# Supplementary material for: TCT-mediated click chemistry for the synthesis of nitrogen-containing functionalities: conversion of carboxylic acids to carbamides, carbamates, carbamothioates, amides and amines
Source: Royal Society of Chemistry journal article supplement (doi:10.1039/d2ob00324d), 2022-01-01
Supplement: d2ob00324d1.pdf [file d2ob00324d1.pdf]

## Supplementary Information

### TCT- Mediated Click Chemistry for the Synthesis of Nitrogen-Containing Functionalities: Conversion of Carboxylic Acids to Carbamides, Carbamates, Carbamothioates, Amides and Amines.

Riyaz Ahmed,<sup>a,b</sup> Ria Gupta,<sup>a,b</sup> Zaheen Akhter,<sup>a,b</sup> Mukesh Kumar<sup>a,b</sup> and Parvinder Pal Singh<sup>a,b,\*</sup>

<sup>a</sup>Natural Product & Medicinal Chemistry Division, CSIR-Indian Institute of Integrative Medicine, Canal Road, Jammu-180001, India.

<sup>b</sup>Academy of Scientific and Innovative Research, (AcSIR), Ghaziabad-201002, India.

| S. No. | Contents                                                                                        | Page No.  |
|--------|-------------------------------------------------------------------------------------------------|-----------|
| 1      | General information                                                                             | S2        |
| 2      | General procedure for one pot conversion of carboxylic acid to carbamides <b>3a-3ao</b> .       | S3        |
| 3      | Spectral data of compounds <b>3a-3ao</b> .                                                      | S3-S15    |
| 4      | General procedure for one pot conversion of carboxylic acid to carbamates <b>4a-4n</b> .        | S16       |
| 5      | Spectral data of compounds <b>4a-4n</b> .                                                       | S16-S20   |
| 6      | Procedure for one pot conversion of carboxylic acid to amides <b>5</b> .                        | S20-S21   |
| 7      | Spectral data of compounds <b>5</b> .                                                           | S21       |
| 8      | Procedure for one pot conversion of carboxylic acid to mono-substituted carbamides <b>6</b> .   | S21-S22   |
| 9      | Spectral data of compounds <b>6</b> .                                                           | S22       |
| 10     | General procedure for one pot conversion of carboxylic acid to amines <b>7a-7e</b> .            | S22       |
| 11     | Spectral data of compounds <b>7a-7e</b> .                                                       | S22-S23   |
| 12     | General procedure for late stage functionalization of natural products and drugs <b>8a-8e</b> . | S24       |
| 13     | Spectral data of compounds <b>8a-8e</b> .                                                       | S24-S26   |
| 14     | Procedure for gram scale reaction.                                                              | S26       |
| 15     | Spectral copies of <sup>1</sup> H-NMR, <sup>13</sup> C-NMR, DEPT of <b>3a-3ao</b> .             | S27-S114  |
| 16     | Spectral copies of <sup>1</sup> H-NMR, <sup>13</sup> C-NMR, DEPT of <b>4a-4n</b> .              | S114-S142 |
| 17     | Spectral copies of <sup>1</sup> H-NMR, <sup>13</sup> C-NMR, DEPT of <b>5</b> .                  | S143-S144 |
| 18     | Spectral copies of <sup>1</sup> H-NMR, <sup>13</sup> C-NMR, DEPT of <b>6</b> .                  | S144-S146 |
| 19     | Spectral copies of <sup>1</sup> H-NMR, <sup>13</sup> C-NMR, DEPT of <b>7a-7e</b> .              | S146-S154 |
| 20     | Spectral copies of <sup>1</sup> H-NMR, <sup>13</sup> C-NMR, DEPT of <b>8a-8e</b> .              | S155-S165 |
| 21     | Controlled experiments.                                                                         | S165-S170 |
| 22     | References.                                                                                     | S171-S172 |

## EXPERIMENTAL SECTION

### General Information

All reactions are carried out in round bottom flask in open atmosphere and reaction mixture was monitored by thin-layer chromatography (TLC). TLC pre-coated silica gel 60 F254 (20 × 20 cm). TLC plates are visualized by exposing UV light. Organic solvents are evaporated on rotary evaporator and all the compounds are purified on flash Column chromatography (230–400 mesh size). Mass spectra are obtained using an Agilent 6540 accurate mass Q-TOF LC/MS (135 eV) spectrometer, using electrospray ionization (ESI). <sup>1</sup>H NMR spectra are recorded on 400 and 500 MHz NMR instruments. Chemical data for protons are reported in parts per million (ppm, scale) downfield from tetramethylsilane as referenced to the residual proton in the NMR solvent (CDCl<sub>3</sub>: δ 7.26, 1.56 CDCl<sub>3</sub> moisture and 1.25 grease peak, DMSO-d<sup>6</sup>: δ 2.51, 3.33 DMSO-d<sup>6</sup> moisture or other solvents as mentioned). All the NMR spectras are processed with MestReNova software. The coupling constant (*J*) are in Hz. ESI-MS and HRMS spectra are recorded on LC-Q-TOF machines. Note: All the care has been taken while performing the reaction, as sodium azide is highly toxic and can react to form potentially explosive compounds. Azides form strong complexes with haemoglobin, and consequently block oxygen transport in the blood.

## General Procedure for one pot conversion of carboxylic acid to carbamides (3a-3aj), (Table 1, Scheme 1 and Scheme 2).

A solution of carboxylic acid **1** (100 mg, 0.500-0.819 mmol) and trichlorotriazine (TCT) (0.33 equiv.) in CH<sub>3</sub>CN (20 ml) was mixed with N-methylmorpholine (NMM) (1.4 equiv.) at room temperature and stirred for 30 minutes and monitored on TLC for the consumption of TCT. To the reaction mixture NaN<sub>3</sub> (1.4 equiv.) and DMAP (10 mol%) were added and reaction mixture stirred for 4-5 hrs at room temperature and observed for the formation of acyl azide **2** and consumption of benzoic acid by TLC. Now, the nitrogen based nucleophile (1.4 equiv.) was added and the reaction mixture was subjected to reflux at 80 °C in an oil bath, facilitating Curtius rearrangement leading to the *in situ* formation of isocyanate and click coupling. The product formation was monitored by TLC. Reaction mixture was subjected to rota vapour to evaporate CH<sub>3</sub>CN and then extraction with ethyl acetate. The organic layer was washed with water and dried over anhydrous Na<sub>2</sub>SO<sub>4</sub>. The organic layer was evaporated under pressure to obtain the crude product which was then purified by flash column chromatography using ethyl acetate and hexane to offered the required products (**3a-3ao**).

### Experimental data:

#### 1,3-Diphenylurea (**3a**):<sup>1</sup>

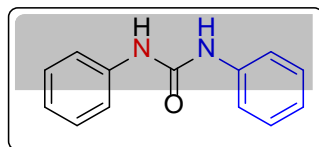

(100 mg, 0.819 mmol of benzoic acid); TLC (Hexane/EtOAc, 6:4) R<sub>f</sub> = 0.4; Yield 92% ; white solid; m.p 236-239 °C.: <sup>1</sup>H NMR (400 MHz, DMSO-d<sub>6</sub>, acquired at 60 °C) δ 8.66 (s, 1H), 7.49 (d, J = 8.5 Hz, 2H), 7.29 (t, J = 7.9 Hz, 2H), 6.97 (t, J = 7.9 Hz, 1H). <sup>13</sup>C NMR (101 MHz, DMSO-d<sub>6</sub>) δ 153.0, 140.1, 129.2, 122.2, 118.6. HRMS (ESI+TOF) calcd. for: C<sub>13</sub>H<sub>13</sub>N<sub>2</sub>O 213.1028 [M+H]<sup>+</sup>, found 213.1033.

#### 1-(4-Methoxyphenyl)-3-phenylurea (**3b**):<sup>2</sup>

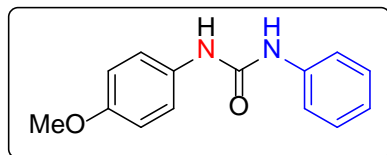

(100 mg, 0.657 mmol of 4-methoxybenzoic acid); TLC (Hexane/EtOAc, 6:4) R<sub>f</sub> = 0.4; Yield 92% ; white solid; m.p.186-190 °C; <sup>1</sup>H NMR (400 MHz, DMSO-d<sub>6</sub>, acquired at 60 °C) δ 8.57 (s, 1H), 8.46 (s, 1H), 7.44 (d, J = 8.1 Hz, 2H), 7.36 (d, J = 8.9 Hz, 2H), 7.27 (t, J = 7.8 Hz, 2H), 6.95 (t, J = 7.3 Hz, 1H), 6.87 (d, J = 8.9 Hz, 2H), 3.72 (s, 3H). <sup>13</sup>C NMR (101 MHz,

DMSO- $d^6$ )  $\delta$  156.4, 154.6, 141.7, 134.6, 130.6, 123.5, 122.0, 120.0, 115.9, 57.1. HRMS (ESI+TOF) calcd. for:  $C_{14}H_{15}N_2O_2$  243.1134  $[M+H]^+$ , found 243.1140.

### 1-(4-Cyanophenyl)-3-phenylurea (3c):<sup>3</sup>

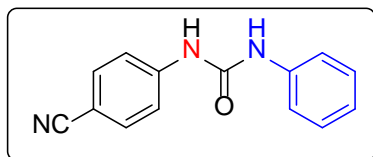

(100 mg, 0.680 mmol of 4-cyanobenzoic acid); TLC (Hexane/EtOAc, 7:3)  $R_f$  = 0.4; Yield 90% ; white solid; m.p. 200-222 °C:  $^1H$  NMR (400 MHz, DMSO- $d^6$ , acquired at 60 °C)  $\delta$  9.15 (s, 1H), 8.80 (s, 1H), 7.76 (dd,  $J$  = 27.2, 8.7 Hz, 4H), 7.55 (d,  $J$  = 7.7 Hz, 2H), 7.39 (t,  $J$  = 7.9 Hz, 2H), 7.11 (t,  $J$  = 7.3 Hz, 1H).  $^{13}C$  NMR (101 MHz, DMSO- $d^6$ )  $\delta$  153.9, 146.1, 141.0, 135.1, 130.7, 124.2, 121.1, 120.4, 119.9, 105.1. HRMS (ESI+TOF) calcd. for:  $C_{14}H_{12}N_3O$  238.0980  $[M+H]^+$ , found 238.0987.

### 1-(4-Chlorophenyl)-3-phenylurea (3d):<sup>4</sup>

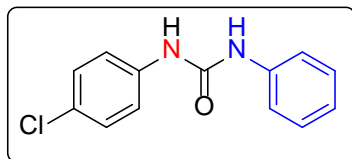

(100 mg, 0.645 mmol of 4-chlorobenzoic acid); TLC (Hexane/EtOAc, 7:3)  $R_f$  = 0.6; Yield 89% ; white solid; m.p. 239-240 °C:  $^1H$  NMR (400 MHz, DMSO- $d^6$ )  $\delta$  8.57 (s, 1H), 8.46 (s, 1H), 7.24 (m, 4H), 7.09 – 7.00 (m, 4H), 6.72 (t,  $J$  = 7.7 Hz, 1H).  $^{13}C$  NMR (101 MHz, DMSO- $d^6$ )  $\delta$  152.9, 140.0, 139.2, 129.1, 125.8, 122.4, 120.1, 118.7. HRMS (ESI+TOF) calcd. for:  $C_{13}H_{12}N_2OCl$  247.0638  $[M+H]^+$ , found 247.0646.

### 1-(4-Methoxyphenyl)-3-(4-(trifluoromethoxy)phenyl)urea (3e):

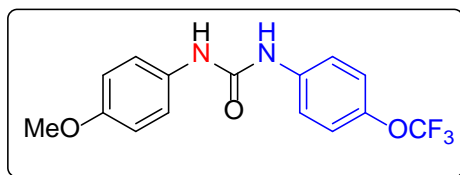

(100 mg, 0.657 mmol of 4-methoxybenzoic acid); TLC (Hexane/EtOAc, 6:4)  $R_f$  = 0.3; Yield 90% ; white solid; m.p. 327-330 °C:  $^1H$  NMR (400 MHz, DMSO- $d^6$ , acquired at 60 °C)  $\delta$  8.63 (s, 1H), 8.35 (s, 1H), 7.42 (d,  $J$  = 8.9 Hz, 2H), 7.23 (d,  $J$  = 8.8 Hz, 2H), 7.07 (d,  $J$  = 8.7 Hz, 2H), 6.70 (d,  $J$  = 8.8 Hz, 2H), 3.53 (s, 3H).  $^{19}F$  NMR (400 MHz, DMSO- $d^6$ )  $\delta$  -57.36 (s).  $^{13}C$  NMR (101 MHz, DMSO- $d^6$ )  $\delta$  156.5, 154.5, 144.3, 141.0, 134.3, 123.4, 122.1, 122.1(q,  $J$  = 256.54 Hz), 121.1, 115.8, 57.0. HRMS (ESI+TOF) calcd. for:  $C_{15}H_{14}N_2O_3F_3$  327.0957  $[M+H]^+$ , found 327.0965.

### 1-(4-Cyanophenyl)-3-(4-(trifluoromethoxy)phenyl)urea (3f):

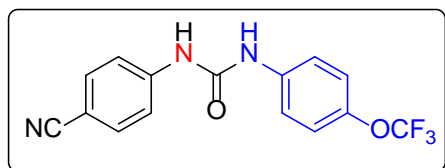

(100 mg, 0.680 mmol of 4-cyanobenzoic acid); TLC (Hexane/EtOAc, 6:4)  $R_f = 0.3$ ; Yield 91% ; white solid; m.p. 272-278 °C:  $^1\text{H}$  NMR (400 MHz, DMSO- $d_6$ , acquired at 60 °C)  $\delta$  9.10 (s, 1H), 8.91 (s, 1H), 7.70 (d,  $J = 8.8$  Hz, 2H), 7.63 (d,  $J = 8.9$  Hz, 2H), 7.56 (d,  $J = 9.1$  Hz, 2H), 7.27 (d,  $J = 8.9$  Hz, 2H).  $^{19}\text{F}$  NMR (376 MHz, DMSO- $d_6$ )  $\delta$  -52.52 (s).  $^{13}\text{C}$  NMR (101 MHz, DMSO- $d_6$ )  $\delta$  153.9, 145.9, 144.9 (d,  $J = 2$  Hz), 140.3, 135.1, 123.5, 122.0 (d,  $J = 256.54$  Hz), 121.7, 120.0, 105.3. HRMS (ESI+TOF) calcd. for:  $\text{C}_{15}\text{H}_{11}\text{N}_3\text{O}_2\text{F}_3$  322.0803  $[\text{M}+\text{H}]^+$ , found 322.0814.

### 1-(4-(tert-Butyl)phenyl)-3-(4-methoxyphenyl)urea (3g):

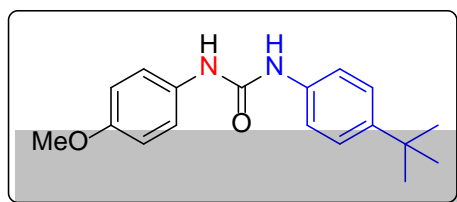

(100 mg, 0.657 mmol of 4-methoxybenzoic acid); TLC (Hexane/EtOAc, 6:4)  $R_f = 0.5$ ; Yield 89% ; white solid; m.p. 239-241 °C:  $^1\text{H}$  NMR (400 MHz, DMSO- $d_6$ )  $\delta$  8.48 (s, 1H), 8.42 (s, 1H), 7.36 (d,  $J = 8.8$  Hz, 4H), 7.28 (d,  $J = 8.7$  Hz, 2H), 6.86 (d,  $J = 9.0$  Hz, 2H), 3.71 (s, 3H), 1.26 (s, 9H).  $^{13}\text{C}$  NMR (101 MHz, DMSO- $d_6$ )  $\delta$  154.9, 153.3, 144.4, 137.7, 133.3, 125.8, 120.4, 118.4, 114.4, 55.6, 34.3, 31.7. HRMS (ESI+TOF) calcd. for:  $\text{C}_{18}\text{H}_{23}\text{N}_2\text{O}_2$  299.1760  $[\text{M}+\text{H}]^+$ , found 299.1770.

### 1-(4-(tert-Butyl)phenyl)-3-(4-cyanophenyl)urea (3h):

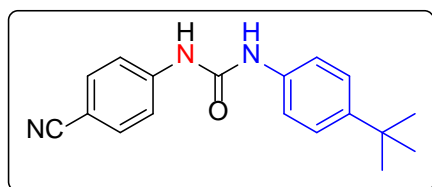

(100 mg, 0.680 mmol of 4-cyanobenzoic acid); TLC (Hexane/EtOAc, 6:4)  $R_f = 0.5$ ; Yield 93% ; white solid; m.p. 283-285 °C:  $^1\text{H}$  NMR (400 MHz, DMSO- $d_6$ , acquired at 60 °C)  $\delta$  9.01 (s, 1H), 8.59 (s, 1H), 7.67 (d,  $J = 8.8$  Hz, 2H), 7.61 (d,  $J = 8.8$  Hz, 2H), 7.35 (d,  $J = 8.7$  Hz, 2H), 7.29 (d,  $J = 8.7$  Hz, 2H), 1.25 (s, 9H).  $^{13}\text{C}$  NMR (101 MHz, DMSO- $d_6$ )  $\delta$  154.0, 146.7, 146.1, 138.2, 135.1, 127.3, 121.2, 120.3, 119.8, 105.0, 35.7, 33.0. HRMS (ESI+TOF) calcd. for:  $\text{C}_{18}\text{H}_{20}\text{N}_3\text{O}$  294.1606  $[\text{M}+\text{H}]^+$ , found 294.1616.

### 1-(4-Methoxyphenethyl)-3-(4-methoxyphenyl)urea (3i):<sup>5</sup>

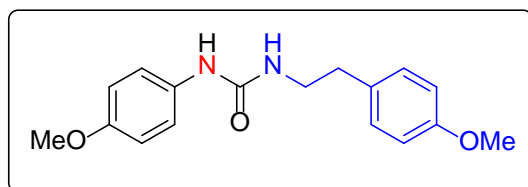

(100 mg, 0.657 mmol of 4-methoxybenzoic acid); TLC (Hexane/EtOAc, 7:3)  $R_f = 0.4$ ; Yield 88% ;

white solid; m.p. 245-249 °C:  $^1\text{H}$  NMR (500 MHz, DMSO- $d_6$ , acquired at 60 °C)  $\delta$  8.22 (s, 1H), 7.82 (d,  $J = 8.7$  Hz, 2H), 7.16 (d,  $J = 8.3$  Hz, 2H), 6.99 (d,  $J = 8.7$  Hz, 2H), 6.87 (d,  $J = 8.4$  Hz, 2H), 3.82 (s, 3H), 3.74 (s, 3H), 3.46 (s, 2H), 2.80 (s, 1H).  $^{13}\text{C}$  NMR (101 MHz, DMSO- $d_6$ )  $\delta$  167.5, 163.3, 159.5, 133.3, 131.4, 130.7, 128.7, 115.6, 115.3, 57.1, 56.8, 42.9, 36.2. MS  $m/z$   $[\text{M}+\text{H}]^+$ , calcd for  $\text{C}_{17}\text{H}_{21}\text{N}_2\text{O}_3$  301.1552; found, 301.17.

### 1-(4-Cyanophenyl)-3-(4-methoxyphenethyl)urea (3j):

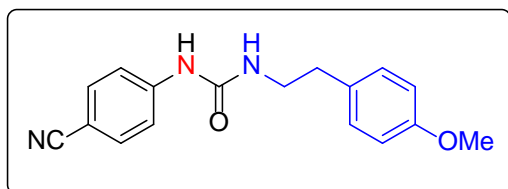

(100 mg, 0.680 mmol of 4-cyanobenzoic acid); TLC (Hexane/EtOAc, 7:3)  $R_f = 0.4$ ; Yield 91% ; white solid; m.p. 287-290 °C:  $^1\text{H}$  NMR (400 MHz, DMSO- $d_6$ , acquired at 60 °C)  $\delta$  8.91 (s, 1H), 7.63 (d,  $J = 8.8$

Hz, 2H), 7.57 (d,  $J = 8.9$  Hz, 2H), 7.16 (d,  $J = 8.6$  Hz, 2H), 6.87 (d,  $J = 8.6$  Hz, 2H), 6.24 (t,  $J = 5.6$  Hz, 1H), 3.73 (s, 3H), 3.36 (m, 2H), 2.72 (t,  $J = 7.1$  Hz, 2H).  $^{13}\text{C}$  NMR (101 MHz, DMSO- $d_6$ )  $\delta$  158.2, 155.0, 145.4, 133.6, 131.6, 130.1, 119.9, 117.9, 114.3, 102.8, 55.4, 41.3, 35.1. HRMS (ESI+TOF) calcd. for:  $\text{C}_{17}\text{H}_{18}\text{N}_3\text{O}_2$  296.1399  $[\text{M}+\text{H}]^+$ , found 296.1409.

### 1-(3,5-Difluorobenzyl)-3-(4-methoxyphenyl)urea (3k):

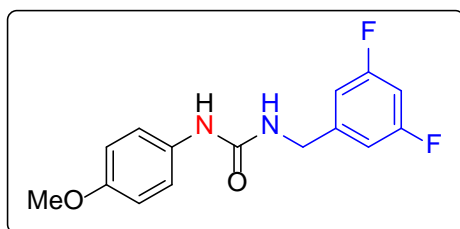

(100 mg, 0.657 mmol of 4-methoxybenzoic acid); TLC (Hexane/EtOAc, 6:4)  $R_f = 0.4$ ; Yield 92% ; white solid; m.p. 215-218 °C:  $^1\text{H}$  NMR (400 MHz, DMSO- $d_6$ , acquired at 60 °C)  $\delta$  8.50 (s, 1H), 7.34 (d,  $J = 9.0$  Hz, 2H), 7.10 (t,  $J = 9.3$  Hz, 1H), 7.03 (d,  $J = 6.6$  Hz, 2H), 6.85 (d,  $J = 9.0$  Hz, 2H), 6.67 (t,  $J = 12$  Hz 1H), 4.34 (d,  $J = 6.0$  Hz, 2H), 3.72 (s, 3H).  $^{13}\text{C}$  NMR (101

MHz, DMSO- $d_6$ )  $\delta$  165.5-165.4 (d,  $J = 13.13$  Hz) , 163.1-162.9 (d,  $J = 16.16$  Hz) , 157.4, 156.0, 147.7-147.5 (t,  $J = 8.08$  Hz, 16.16 Hz), 135.2, 121.6, 115.7, 111.8- 111.6 (m), 104.0- 103.5 (t,  $J = 26.26$  Hz), 57.0, 44.0. HRMS (ESI+TOF) calcd. for:  $\text{C}_{15}\text{H}_{15}\text{N}_2\text{O}_2\text{F}_2$  293.1102  $[\text{M}+\text{H}]^+$ , found 293.1112.

### 1-(4-Cyanophenyl)-3-(3,5-difluorobenzyl)urea (3l):

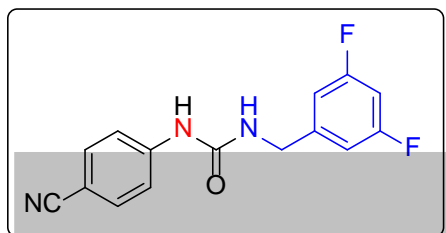

(100 mg, 0.680 mmol of 4-cyanobenzoic acid); TLC (Hexane/EtOAc, 6:4)  $R_f = 0.4$ ; Yield 90% ; white solid;

m.p. 257-260 °C:  $^1\text{H}$  NMR (400 MHz, DMSO- $d_6$ )  $\delta$  9.36 (t,  $J$  = 5.8 Hz, 1H), 8.06 (d,  $J$  = 8.0 Hz, 2H), 7.99 (d,  $J$  = 8.4 Hz, 2H), 7.12 (t,  $J$  = 9.4 Hz, 1H), 7.05 (d,  $J$  = 6.6 Hz, 2H), 4.52 (d,  $J$  = 5.9 Hz, 2H).  $^{13}\text{C}$  NMR (101 MHz, DMSO- $d_6$ )  $\delta$  165.6, 164.1-164.0 (d,  $J$  = 13.13 Hz), 161.6-161.5 (d,  $J$  = 13.13 Hz), 144.5-144.4 (t,  $J$  = 9.09 Hz), 138.4, 132.9, 128.6, 118.7, 114.2, 110.8-110.5(m), 103.0-102.5(t,  $J$  = 25.25), 42.6. HRMS (ESI+TOF) calcd. for:  $\text{C}_{15}\text{H}_{11}\text{N}_3\text{O}_2$  288.0948  $[\text{M}+\text{H}]^+$ , found 288.0962.

### 1-(4-Methoxyphenyl)-3-(4-methylbenzyl)urea (3m):<sup>6</sup>

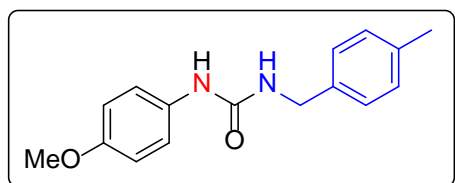

(100 mg, 0.657 mmol of 4-methoxybenzoic acid); TLC (Hexane/EtOAc, 6:4)  $R_f$  = 0.4; Yield 85% ; white solid; m.p. 212-216 °C:  $^1\text{H}$  NMR (400 MHz, DMSO- $d_6$ )  $\delta$  8.86 (t,  $J$  = 5.9 Hz, 1H), 7.87 (d,  $J$  = 8.9 Hz, 2H), 7.20 (d,  $J$  = 8.0 Hz, 2H), 7.13 (d,  $J$  = 7.9 Hz, 2H), 7.00 (d,  $J$  = 8.9 Hz, 2H), 4.42 (d,  $J$  = 6.0 Hz, 2H), 3.81 (s, 3H), 2.27 (s, 3H).  $^{13}\text{C}$  NMR (126 MHz, DMSO- $d_6$ )  $\delta$  166.1, 162.0, 137.2, 136.1, 129.5, 129.2, 127.6, 127.0, 113.9, 55.7, 42.7, 21.1. MS  $m/z$   $[\text{M}+\text{H}]^+$ , calcd for  $\text{C}_{16}\text{H}_{19}\text{N}_2\text{O}_2$  271.3400; found, 271.34.

### 1-(4-Cyanophenyl)-3-(4-methylbenzyl)urea (3n):

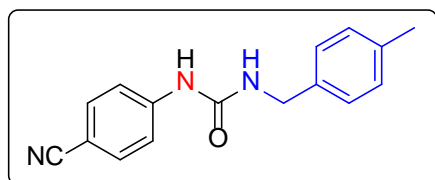

(100 mg, 0.680 mmol of 4-cyanobenzoic acid); TLC (Hexane/EtOAc, 6:4)  $R_f$  = 0.4; Yield 87% ; white solid; m.p. 254-259 °C:  $^1\text{H}$  NMR (400 MHz, DMSO- $d_6$ , acquired at 60 °C)  $\delta$  8.97 (s, 1H), 7.66 (d,  $J$  = 9.0 Hz, 2H), 7.61 (d,  $J$  = 9.0 Hz, 2H), 7.22 (d,  $J$  = 8.1 Hz, 2H), 7.16 (d,  $J$  = 7.9 Hz, 2H), 6.72 (t,  $J$  = 5.8 Hz, 1H), 4.30 (d,  $J$  = 5.9 Hz, 2H), 2.31 (s, 3H).  $^{13}\text{C}$  NMR (101 MHz, DMSO- $d_6$ )  $\delta$  155.0, 145.3, 137.3, 136.3, 133.6, 129.3, 127.6, 119.9, 117.9, 102.8, 42.9, 21.1. MS  $m/z$   $[\text{M}+\text{H}]^+$ , calcd for  $\text{C}_{16}\text{H}_{16}\text{N}_3\text{O}$  266.1293; found, 266.13.

### 1-(6-fluoropyridin-3-yl)-3-(4-methoxyphenyl)urea (3o):

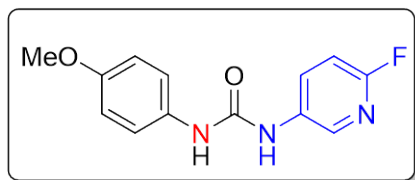

(100 mg, 0.657 mmol of 4-methoxybenzoic acid); TLC (Hexane/EtOAc, 6:4)  $R_f$  = 0.5; Yield 85% ; white solid; m.p. 294-299 °C:  $^1\text{H}$  NMR (400 MHz, DMSO- $d_6$ )  $\delta$  8.83 (s, 1H),

8.64 (s, 1H), 8.27 (s, 1H), 8.10 – 8.03 (m, 1H), 7.37 (d,  $J = 8.9$  Hz, 2H), 7.10 (dd,  $J = 8.8, 3.2$  Hz, 1H), 6.87 (d,  $J = 8.9$  Hz, 2H), 3.71 (s, 3H).  $^{13}\text{C}$  NMR (101 MHz, DMSO- $d_6$ )  $\delta$  159.5, 157.2, 155.1, 153.2, 137.1, 136.9, 135.4, 135.3, 132.8, 132.3, 132.2, 120.8, 114.4, 109.7, 109.3, 55.5. HRMS (ESI+TOF) calcd. for:  $\text{C}_{13}\text{H}_{13}\text{N}_3\text{O}_2\text{F}$  262.0992  $[\text{M}+\text{H}]^+$ , found 262.0995

### 1-(4-Cyanophenyl)-3-(6-fluoropyridin-3-yl)urea (3p):

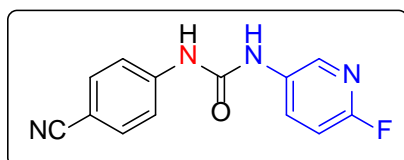

(100 mg, 0.680 mmol of 4-cyanobenzoic acid); TLC (Hexane/EtOAc, 7:3)  $R_f = 0.4$ ; Yield 89% ; white solid; m.p. 292-297 °C:  $^1\text{H}$  NMR (400 MHz, DMSO- $d_6$ )  $\delta$  9.16 (s, 1H), 8.89 (s, 1H), 8.16 (s, 1H), 7.94 (m, 1H), 7.57 (d,  $J = 8.5$  Hz, 2H), 7.51 (d,  $J = 8.6$  Hz, 2H), 6.97 (d,  $J = 8.7$  Hz, 1H).  $^{13}\text{C}$  NMR (101 MHz, DMSO- $d_6$ )  $\delta$  159.9, 157.6, 152.6, 144.3, 137.7-137.5 (d,  $J = 15.15$  Hz), 134.6-134.5 (d,  $J = 5.05$  Hz), 133.6, 132.8-132.7 (d,  $J = 7.07$  Hz), 119.6, 118.6, 109.7, 109.3, 104.0. HRMS (ESI+TOF) calcd. for:  $\text{C}_{13}\text{H}_{10}\text{N}_4\text{OF}$  257.0839  $[\text{M}+\text{H}]^+$ , found 257.0847.

### 1-(4-Methoxyphenyl)-3-pentylurea (3q):<sup>7</sup>

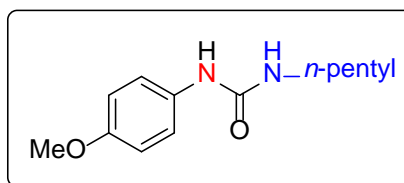

(100 mg, 0.657 mmol of 4-methoxybenzoic acid); TLC (Hexane/EtOAc, 8:2)  $R_f = 0.6$ ; Yield 86% ; white solid; m.p. 293-297 °C:  $^1\text{H}$  NMR (400 MHz,  $\text{CDCl}_3$ , acquired at 60 °C)  $\delta$  7.16 (d,  $J = 8.9$  Hz, 2H), 6.81 (d,  $J = 8.9$  Hz, 2H), 5.13 (t,  $J = 4.7$  Hz, 1H), 3.76 (s, 3H), 3.16 (dd,  $J = 13.2, 6.9$  Hz, 2H), 1.43 (dd,  $J = 14.2, 7.1$  Hz, 2H), 1.30 – 1.22 (m, 4H), 0.86 (t,  $J = 6.9$  Hz, 3H).  $^{13}\text{C}$  NMR (101 MHz,  $\text{CDCl}_3$ )  $\delta$  158.0, 132.8, 125.5, 115.9, 78.7, 78.4, 78.1, 56.9, 41.7, 31.2, 30.4, 23.7, 15.3. HRMS (ESI+TOF) calcd. for:  $\text{C}_{13}\text{H}_{21}\text{N}_2\text{O}_2$  237.1603  $[\text{M}+\text{H}]^+$ , found 237.1610.

### 1-(4-Cyanophenyl)-3-pentylurea (3r):

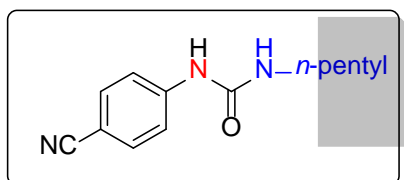

(100 mg, 0.680 mmol of 4-cyanobenzoic acid); TLC (Hexane/EtOAc, 8:2)  $R_f = 0.5$ ; Yield 91% ; white solid; m.p. 94 °C:  $^1\text{H}$  NMR (400 MHz, DMSO- $d_6$ )  $\delta$  8.98 (s, 1H), 7.69 (d,  $J = 8.8$  Hz, 2H), 7.61 (d,  $J = 8.8$  Hz, 2H), 6.38 (t,  $J = 5.5$  Hz, 1H), 3.13 (dd,  $J = 12.8, 6.8$  Hz, 2H), 1.52 – 1.44 (m, 2H), 1.37 – 1.27 (m, 4H), 0.92 (t,  $J = 6.9$



Hz, 3H).  $^{13}\text{C}$  NMR (101 MHz, DMSO- $d_6$ )  $\delta$  155.0, 145.4, 133.6, 119.9, 117.8, 102.6, 29.7, 29.0, 22.3, 14.4. HRMS (ESI+TOF) calcd. for:  $\text{C}_{13}\text{H}_{18}\text{N}_3\text{O}$  232.1450  $[\text{M}+\text{H}]^+$  found 232.1458.

### 1-Hexadecyl-3-(4-methoxyphenyl)urea (3s):

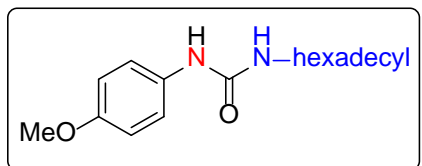

(100 mg, 0.657 mmol of 4-methoxybenzoic acid); TLC (Hexane/EtOAc, 8:2)  $R_f = 0.7$ ; Yield 89% ; white solid; m.p. 132- 137  $^{\circ}\text{C}$  :  $^1\text{H}$  NMR (400 MHz,  $\text{CDCl}_3$ , acquired at 60  $^{\circ}\text{C}$ )  $\delta$  7.70 (d,  $J = 8.9$  Hz, 2H), 7.25 (s, 1H), 6.90 (d,  $J = 8.9$  Hz, 2H), 5.92 (s, 1H), 3.83 (s, 3H), 3.42 (dd,  $J = 12.9, 7.1$  Hz, 2H), 1.59 (d,  $J = 7.0$  Hz, 2H), 1.27 (m, 26H), 0.88 (s, 3H).  $^{13}\text{C}$  NMR (101 MHz,  $\text{CDCl}_3$ )  $\delta$  166.9, 162.2, 128.5, 127.3, 113.7, 55.3, 40.0, 31.9, 29.7, 29.6, 29.5, 29.5, 29.3, 27.0, 22.6, 14.0. HRMS (ESI+TOF) calcd. for:  $\text{C}_{24}\text{H}_{43}\text{N}_2\text{O}_2$  391.3325  $[\text{M}+\text{H}]^+$ , found 391.3326.

### 1-(4-Cyanophenyl)-3-hexadecylurea (3t):

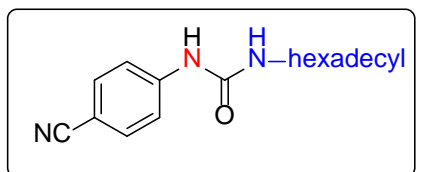

(100 mg, 0.680 mmol of 4-cyanobenzoic acid); TLC (Hexane/EtOAc, 8:2)  $R_f = 0.6$ ; Yield 86% ; white solid; m.p.: 132- 137  $^{\circ}\text{C}$ ;  $^1\text{H}$  NMR (400 MHz,  $\text{CDCl}_3$ , acquired at 60  $^{\circ}\text{C}$ )  $\delta$  8.35 (s, 1H), 7.51 (d,  $J = 8.7$  Hz, 2H), 7.46 (d,  $J = 8.7$  Hz, 2H), 5.84 (s, 1H), 3.20 (dd,  $J = 12.6, 6.9$  Hz, 2H), 1.53 – 1.46 (m, 2H), 1.26 (m, 26H), 0.88 (t,  $J = 6.8$  Hz, 3H).  $^{13}\text{C}$  NMR (101 MHz,  $\text{CDCl}_3$ )  $\delta$  155.3, 144.6, 132.9, 117.7, 103.4, 39.7, 31.81, 30.0, 29.5, 29.5, 29.2, 26.8, 22.5, 14.0. HRMS (ESI+TOF) calcd. for:  $\text{C}_{24}\text{H}_{40}\text{N}_3\text{O}$  386.3171  $[\text{M}+\text{H}]^+$ , found 386.3173.

### 1-(tert-Butyl)-3-(4-methoxyphenyl)urea (3u):<sup>8</sup>

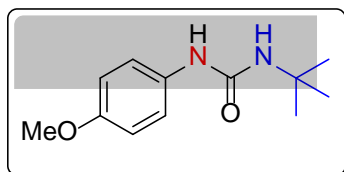

(100 mg, 0.657 mmol of 4-methoxybenzoic acid); TLC (Hexane/EtOAc, 6:4)  $R_f = 0.6$ ; Yield 85% ; white solid; m.p. 203- 208  $^{\circ}\text{C}$ :  $^1\text{H}$  NMR (400 MHz, DMSO- $d_6$ , acquired at 60  $^{\circ}\text{C}$ )  $\delta$  7.91 (s, 1H), 7.24 (d,  $J = 8.9$  Hz, 2H), 6.79 (d,  $J = 8.9$  Hz, 2H), 5.76 (s, 1H), 3.69 (s, 3H), 1.29 (s, 9H).  $^{13}\text{C}$  NMR (101 MHz, DMSO- $d_6$ )  $\delta$  155.2, 154.2, 134.2, 119.6, 114.3, 55.5, 49.8, 29.5. HRMS (ESI+TOF) calcd. for:  $\text{C}_{12}\text{H}_{19}\text{N}_2\text{O}_2$  223.1447  $[\text{M}+\text{H}]^+$ , found 223.1452.

### 1-(*tert*-Butyl)-3-(4-cyanophenyl)urea (3v):

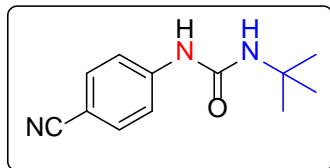

(100 mg, 0.680 mmol of 4-cyanobenzoic acid); TLC (Hexane/EtOAc, 6:4)  $R_f = 0.5$ ; Yield 88% ; white solid; m.p.139-144 °C:  $^1\text{H NMR}$  (400 MHz, DMSO- $d_6$ )  $\delta$  8.72 (s, 1H), 7.61 (d,  $J = 8.5$  Hz, 2H), 7.49 (d,  $J = 8.5$  Hz, 2H), 6.16 (s, 1H), 1.26 (s, 9H).  $^{13}\text{C NMR}$  (101 MHz, DMSO- $d_6$ )  $\delta$  154.1, 145.4, 133.5, 119.9, 117.6, 102.5, 50.1, 29.2. HRMS (ESI+TOF) calcd. for:  $\text{C}_{12}\text{H}_{16}\text{N}_3\text{O}$  218.1293  $[\text{M}+\text{H}]^+$ , found 218.1297.

### 1-Cyclobutyl-3-(4-methoxyphenyl)urea (3w):

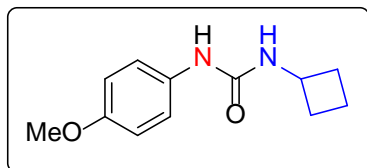

(100 mg, 0.657 mmol of 4-methoxybenzoic acid); TLC (Hexane/EtOAc, 6:4)  $R_f = 0.6$ ; Yield 84% ; white solid; m.p.172-175 °C:  $^1\text{H NMR}$  (500 MHz, DMSO- $d_6$ , acquired at 60 °C)  $\delta$  7.98 (s, 1H), 7.26 (d,  $J = 8.9$  Hz, 2H), 6.81 (d,  $J = 8.8$  Hz, 2H), 6.19 (s, 1H), 4.15 – 4.10 (m, 1H), 3.70 (s, 3H), 2.21 (d,  $J = 8.3$  Hz, 2H), 1.87 – 1.82 (m, 2H), 1.63 (m, 2H).  $^{13}\text{C NMR}$  (101 MHz, DMSO- $d_6$ )  $\delta$  156.2, 155.8, 135.4, 121.3, 115.7, 57.0, 46.4, 33.0, 16.2. HRMS (ESI+TOF) calcd. for:  $\text{C}_{12}\text{H}_{17}\text{N}_2\text{O}_2$  221.1290  $[\text{M}+\text{H}]^+$ , found 221.1293.

### 1-(4-Cyanophenyl)-3-cyclobutylurea (3x):

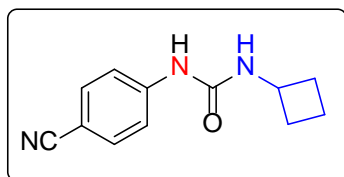

(100 mg, 0.680 mmol of 4-cyanobenzoic acid); TLC (Hexane/EtOAc, 7:3)  $R_f = 0.5$ ; Yield 86% ; white solid; m.p. 142-145 °C:  $^1\text{H NMR}$  (500 MHz, DMSO- $d_6$ , acquired at 60 °C)  $\delta$  8.75 (s, 1H), 7.62 (d,  $J = 8.7$  Hz, 2H), 7.55 (d,  $J = 8.6$  Hz, 2H), 6.53 (d,  $J = 7.0$  Hz, 1H), 4.14 (dd,  $J = 15.7, 7.9$  Hz, 1H), 2.22 (m, 2H), 1.92 – 1.83 (t,  $J = 8$  Hz, 2H), 1.64 (m, 2H).  $^{13}\text{C NMR}$  (101 MHz, DMSO- $d_6$ )  $\delta$  155.4, 146.7, 134.9, 121.2, 119.3, 104.3, 46.4, 32.6, 16.3. HRMS (ESI+TOF) calcd. for:  $\text{C}_{12}\text{H}_{14}\text{N}_3\text{O}$  216.1137  $[\text{M}+\text{H}]^+$ , found 216.1141.

### 1-Cyclopropyl-3-(4-methoxyphenyl)urea (3y):<sup>9</sup>

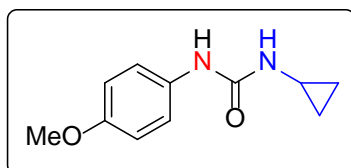

(100 mg, 0.657 mmol of 4-methoxybenzoic acid); TLC (Hexane/EtOAc, 7:3)  $R_f = 0.4$ ; Yield 89% ; white solid; m.p.183-187 °C:  $^1\text{H NMR}$  (400 MHz, DMSO- $d_6$ )  $\delta$  8.12 (s, 1H), 7.32 (d,  $J$

= 8.9 Hz, 2H), 6.83 (d,  $J = 8.9$  Hz, 2H), 6.31 (d,  $J = 1.5$  Hz, 1H), 3.71 (s, 3H), 2.53 (m, 1H), 0.64 (m, 2H), 0.42 – 0.39 (m, 2H).  $^{13}\text{C}$  NMR (101 MHz, DMSO- $d_6$ )  $\delta$  158.1, 155.9, 135.3, 121.6, 115.7, 57.0, 24.2, 8.3. HRMS (ESI+TOF) calcd. for:  $\text{C}_{11}\text{H}_{15}\text{N}_2\text{O}_2$  207.1134  $[\text{M}+\text{H}]^+$ , found 207.1135.

### 1-(4-Cyanophenyl)-3-cyclopropylurea (3z):

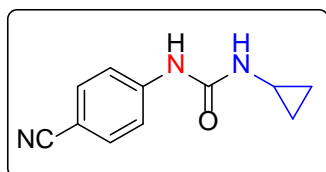

(100 mg, 0.680 mmol of 4-cyanobenzoic acid); TLC (Hexane/EtOAc, 7:3)  $R_f = 0.4$ ; Yield 91% ; white solid; m.p.133 -138 °C:  $^1\text{H}$  NMR (400 MHz, DMSO- $d_6$ , acquired at 60 °C)  $\delta$  8.84 (s, 1H), 7.66 (d,  $J = 8.7$  Hz, 2H), 7.59 (d,  $J = 8.7$  Hz, 2H), 6.61 (s, 1H), 2.56 (dt,  $J = 10.1, 3.3$  Hz, 1H), 0.65 (m, 2H), 0.44 – 0.41 (m, 2H).  $^{13}\text{C}$  NMR (101 MHz, DMSO- $d_6$ )  $\delta$  157.3, 146.6, 134.9, 121.2, 119.5, 104.4, 24.2, 8.2. HRMS (ESI+TOF) calcd. for:  $\text{C}_{11}\text{H}_{12}\text{N}_3\text{O}$  202.0980  $[\text{M}+\text{H}]^+$ , found 202.0988.

### *N*-(4-Methoxyphenyl)piperazine-1-carboxamide (3aa):<sup>10</sup>

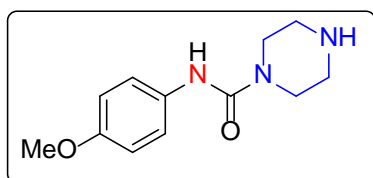

(100 mg, 0.657 mmol of 4-methoxybenzoic acid ); TLC (DCM/MeOH, 8:2)  $R_f = 0.6$ ; Yield 80% ; white solid; m.p. 225-230 °C:  $^1\text{H}$  NMR (400 MHz, DMSO- $d_6$ )  $\delta$  7.34 (d,  $J = 8.8$  Hz, 2H), 6.97 (d,  $J = 8.8$  Hz, 2H), 3.78 (s, 3H), 3.41 (s, 4H), 3.22 (s, 2H), 2.69 (s, 4H);  $^{13}\text{C}$  NMR (101 MHz, DMSO- $d_6$ )  $\delta$  169.5, 160.6, 129.4, 128.1, 114.0, 55.6, 45.4, *aliphatic carbon peak correspond to piperzyl moiety get suppressed*; HRMS (ESI+TOF) calcd. for:  $\text{C}_{12}\text{H}_{17}\text{N}_3\text{O}_2\text{Na}$  258.1218  $[\text{M}+\text{H}]^+$ , found 258.1228.

### *N*-(4-Cyanophenyl)piperazine-1-carboxamide (3ab):

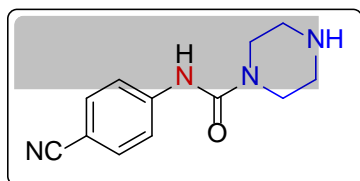

(100 mg, 0.680 mmol of 4-cyanobenzoic acid); TLC (DCM/MeOH, 8:2)  $R_f = 0.4$ ; Yield 77% ; white solid; m.p. 270-275 °C:  $^1\text{H}$  NMR (400 MHz, DMSO- $d_6$ )  $\delta$  7.92 (d,  $J = 8.5$  Hz, 2H), 7.57 (d,  $J = 8.5$  Hz, 2H), 3.56 (s, 2H), 3.17 (s, 2H), 2.75 (s, 2H), 2.63 (s, 2H).  $^{13}\text{C}$  NMR (101 MHz, DMSO- $d_6$ )  $\delta$  141.0, 133.0, 128.1, 118.8, 112.4, 48.6, 46.0, 45.5, 43.0. MS  $m/z$   $[\text{M}+\text{H}]^+$ , calcd for  $\text{C}_{12}\text{H}_{15}\text{N}_4\text{O}$  231.1246; found, 231.13.

#### 4-((4-Methoxyphenyl)carbamoyl)piperazine-1-carboxylate (3ac):<sup>11</sup>

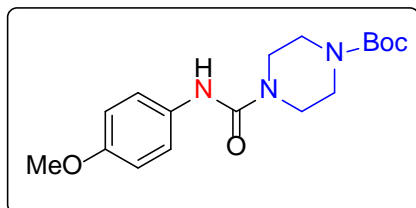

(100 mg, 0.657 mmol of 4-methoxybenzoic acid); TLC (Hexane/EtOAc, 6:4)  $R_f = 0.7$ ; Yield 76% ; white solid; m.p. 260-264 °C:  $^1\text{H NMR}$  (400 MHz, DMSO- $d_6$ )  $\delta$  7.39 (d,  $J = 8.7$  Hz, 2H), 6.98 (d,  $J = 8.7$  Hz, 2H), 3.79 (s, 3H), 3.46 (s, 3H), 3.40 (s, 2H), 3.37 (s, 3H), 1.41 (s, 9H).  $^{13}\text{C NMR}$  (101 MHz, DMSO- $d_6$ )  $\delta$  169.6, 160.7, 154.2, 129.5, 128.0, 114.0, 79.6, 55.6, *aliphatic carbon peak correspond to piperzyl moiety not appeared*, 28.4. MS  $m/z$   $[\text{M}+\text{H}]^+$ , calcd for  $\text{C}_{17}\text{H}_{26}\text{N}_3\text{O}_4$  336.1923; found, 336.20.

#### *N*-(4-Cyanophenyl)-4-methylpiperazine-1-carboxamide (3ad):

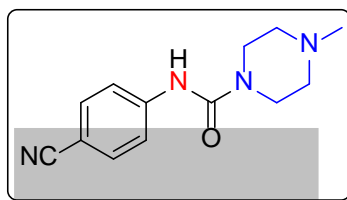

(100 mg, 0.680 mmol of 4-cyanobenzoic acid); TLC (Hexane/EtOAc, 7:3)  $R_f = 0.4$ ; Yield 78% ; white solid; m.p. 210-215 °C:  $^1\text{H NMR}$  (400 MHz, DMSO- $d_6$ , acquired at 60 °C)  $\delta$  8.85 (s, 1H), 7.65 (d,  $J = 5.5$  Hz, 4H), 3.46 (s, 4H), 2.33 (s, 4H), 2.21 (s, 3H).  $^{13}\text{C NMR}$  (101 MHz, DMSO- $d_6$ )  $\delta$  156.1, 147.1, 134.6, 121.2, 120.8, 104.8, 56.3, 47.5, 45.6. HRMS (ESI+TOF) calcd. for:  $\text{C}_{13}\text{H}_{17}\text{N}_4\text{O}$  245.1402  $[\text{M}+\text{H}]^+$ , found 245.1408.

#### 4-Cyclopropyl-*N*-(4-methoxyphenyl)piperazine-1-carboxamide (3ae):

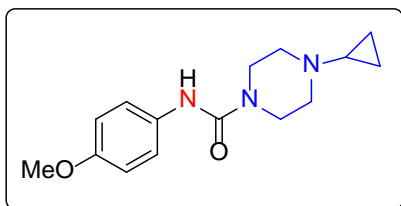

(100 mg, 0.657 mmol of 4-methoxybenzoic acid); TLC (Hexane/EtOAc, 7:3)  $R_f = 0.4$ ; Yield 77% ; white solid; m.p. 213 °C:  $^1\text{H NMR}$  (400 MHz, DMSO- $d_6$ )  $\delta$  7.13 (d,  $J = 8.8$  Hz, 2H), 6.75 (d,  $J = 8.8$  Hz, 2H), 3.57 (s, 3H), 3.18 (d,  $J = 22.7$  Hz, 4H), 2.29 (dd,  $J = 4.8, 2.9$  Hz, 4H), 1.44 – 1.39 (m, 1H), 0.22 – 0.17 (m, 2H), 0.12 – 0.07 (m, 2H).  $^{13}\text{C NMR}$  (101 MHz, DMSO- $d_6$ )  $\delta$  169.4, 160.6, 129.4, 128.2, 114.0, 55.6, 53.1, 38.3, *aliphatic carbon peak correspond to piperzyl moiety get suppressed*, 6.1; MS  $m/z$   $[\text{M}+\text{H}]^+$ , calcd for  $\text{C}_{15}\text{H}_{22}\text{N}_3\text{O}_2$  276.1712; found, 276.18.

#### *N*-(4-Cyanophenyl)-4-cyclopropylpiperazine-1-carboxamide (3af):

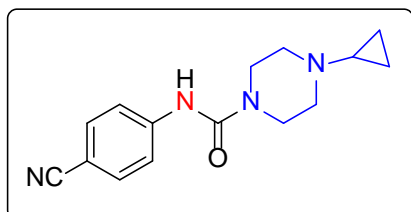

(100 mg, 0.680 mmol of 4-cyanobenzoic acid); TLC (Hexane/EtOAc, 7:3)  $R_f = 0.4$ ; Yield 73% ; white solid; m.p.

253-257 °C:  $^1\text{H}$  NMR (400 MHz, DMSO)  $\delta$  7.93 (d,  $J$  = 8.5 Hz, 2H), 7.58 (d,  $J$  = 8.5 Hz, 2H), 3.59 (s, 2H), 3.35 (s, 1H), 3.21 (s, 2H), 2.60 (s, 2H), 2.48 (s, 2H), 1.77 – 1.55 (m, 1H), 0.43 (dd,  $J$  = 6.4, 2.1 Hz, 2H), 0.38 – 0.22 (m, 2H).  $^{13}\text{C}$  NMR (101 MHz, DMSO)  $\delta$  167.7, 140.9, 133.0, 128.2, 118.8, 112.5, 53.2, 52.7, 47.3, 38.3, 6.1. MS  $m/z$  ( $\text{M}+\text{H}$ ) $^+$ : calcd for  $\text{C}_{15}\text{H}_{19}\text{N}_4\text{O}_1$  271.1559; found, 271.16.

#### 4-Cyclopropyl-*N*-(4-methoxyphenyl)piperazine-1-carboxamide (3ag):

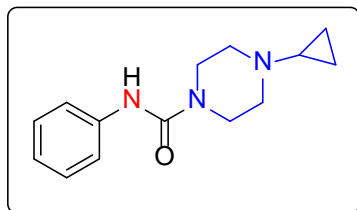

(100 mg, 0.819 mmol of benzoic acid); TLC (Hexane/EtOAc, 7:3)  $R_f$  = 0.4; Yield 78% ; white solid; m.p. 253-257 °C:  $^1\text{H}$  NMR (400 MHz, DMSO- $d_6$ )  $\delta$  7.13 (d,  $J$  = 8.8 Hz, 2H), 6.75 (d,  $J$  = 8.8 Hz, 2H), 3.57 (s, 3H), 3.18 (d,  $J$  = 22.7 Hz, 4H), 2.29 (dd,  $J$  = 4.8, 2.9 Hz, 4H), 1.44 – 1.39 (m, 1H), 0.22 – 0.17 (m, 2H), 0.12 – 0.07 (m, 2H).  $^{13}\text{C}$  NMR (101 MHz, DMSO- $d_6$ )  $\delta$  155.4, 140.8, 128.7, 122.2, 120.1, 53.1, 44.0, 38.5, 6.0. HRMS (ESI+TOF) calcd. for:  $\text{C}_{14}\text{H}_{19}\text{N}_3\text{O}_2$  268.1426 [ $\text{M}+\text{H}$ ] $^+$ , found 268.1433.

#### 1-phenyl-3-(*o*-tolyl)urea (3ah):

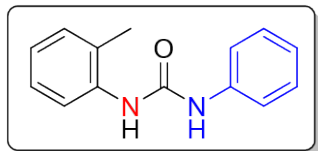

100 mg, 0.735 mmol of 2-methylbenzoic acid); TLC (Hexane/EtOAc, 7:3)  $R_f$  = 0.4; Yield 84% ; white solid; m.p. 233-237 °C:  $^1\text{H}$  NMR (400 MHz, DMSO)  $\delta$  9.05 (s, 1H), 7.94 (s, 1H), 7.88 (d,  $J$  = 8.0 Hz, 1H), 7.50 (d,  $J$  = 8.0 Hz, 2H), 7.30 (t,  $J$  = 7.8 Hz, 2H), 7.16 (dd,  $J$  = 12.5, 7.5 Hz, 2H), 6.96 (dd,  $J$  = 16.2, 7.7 Hz, 2H), 2.26 (s, 3H).  $^{13}\text{C}$  NMR (101 MHz, DMSO)  $\delta$  153.1, 140.3, 137.9, 130.6, 129.3, 127.8, 126.6, 123.0, 122.1, 121.4, 118.4, 18.3. HRMS (ESI+TOF) calcd. for:  $\text{C}_{14}\text{H}_{15}\text{N}_2\text{O}$  227.1184 [ $\text{M}+\text{H}$ ] $^+$ , found 227.1181.

#### 1-phenyl-3-(*m*-tolyl)urea (3ai):

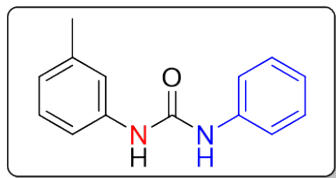

100 mg, 0.735 mmol of 3-methylbenzoic acid); TLC (Hexane/EtOAc, 7:3)  $R_f$  = 0.4; Yield 87% ; white solid; m.p. 230-235 °C:  $^1\text{H}$  NMR (400 MHz, DMSO- $d_6$ )  $\delta$  8.68 (s, 1H), 8.62 (s, 1H), 7.50 (d,  $J$  = 7.9 Hz, 2H), 7.35 (s, 1H), 7.29 (t,  $J$  = 7.8 Hz, 3H), 7.17 (t,  $J$  = 7.8 Hz, 1H), 6.97 (t,  $J$  = 7.3 Hz, 1H), 6.79 (d,  $J$  = 7.4 Hz, 1H), 2.29 (s, 3H).  $^{13}\text{C}$  NMR (101

MHz, DMSO-d<sup>6</sup>)  $\delta$  153.0, 140.2, 140.1, 138.4, 129.2, 129.0, 123.0, 122.2, 119.1, 118.6, 115.8, 40.5, 40.3, 40.1, 39.9, 39.7, 39.5, 39.2, 21.6. HRMS (ESI+TOF) calcd. for: C<sub>14</sub>H<sub>15</sub>N<sub>2</sub>O 227.1184 [M+H]<sup>+</sup>, found 227.1186.

### 1-(5-chloro-2-methoxyphenyl)-3-phenylurea(3aj):

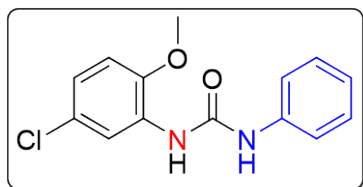

100 mg, 0.537 mmol of 5-chloro-2-methoxybenzoic acid); TLC (Hexane/EtOAc, 7:3) R<sub>f</sub> = 0.4; Yield 79% ; white solid; m.p. 252-257 °C: <sup>1</sup>H NMR (400 MHz, DMSO-d<sup>6</sup>)  $\delta$  9.42 (s, 1H), 8.43 (s, 1H), 8.29 (d, *J* = 2.2 Hz, 1H), 7.49 (d, *J* = 7.9 Hz, 2H), 7.30 (t, *J* = 7.8 Hz, 2H), 6.99 (m, 3H), 3.89 (s, 3H). <sup>13</sup>C NMR (101 MHz, DMSO-d<sup>6</sup>)  $\delta$  152.7, 146.7, 139.9, 130.5, 129.3, 124.8, 122.4, 121.2, 118.5, 117.8, 112.3, 56.5. HRMS (ESI+TOF) calcd. for: C<sub>14</sub>H<sub>14</sub>N<sub>2</sub>O<sub>2</sub>Cl 277.0744 [M+H]<sup>+</sup>, found 277.0747.

### 1-Phenyl-3-undecylurea (3ak)<sup>12</sup>:

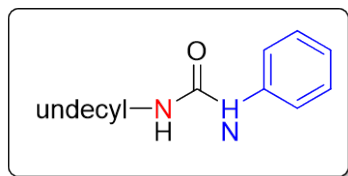

( 100 mg, 0.500 mg of dodecanoic acid); TLC (Hexane/EtOAc, 7:3) R<sub>f</sub> = 0.4; Yield 91% ; white solid; m.p. 160- 165 °C: <sup>1</sup>H NMR (400 MHz, CDCl<sub>3</sub>)  $\delta$  7.51 (d, *J* = 7.9 Hz, 2H), 7.29 (t, *J* = 7.9 Hz, 2H), 7.08 (t, *J* = 7.4 Hz, 1H), 2.34 (t, *J* = 8 Hz, 2H), 1.74 – 1.67 (m, 2H), 1.62 (m, 2H), 1.26 (m, 16H), 0.88 (t, *J* = 8 Hz, 3H). <sup>13</sup>C NMR (101 MHz, CDCl<sub>3</sub>)  $\delta$  154.0, 129.1, 124.6, 119.2, 41.1, 31.9, 29.6, 29.5, 29.3, 26.7, 22.7, 14.1. HRMS (ESI+TOF) calcd. for: C<sub>18</sub>H<sub>31</sub>N<sub>2</sub>O 291.2436 [M+H]<sup>+</sup>, found 291.2446.

### 1-(3-bromo-4-methylphenyl)-3-undecylurea (3al):

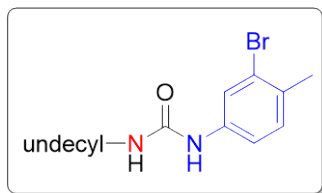

( 100 mg, 0.500 mg of dodecanoic acid); TLC (Hexane/EtOAc, 7:3) R<sub>f</sub> = 0.4; Yield 91% ; white solid; m.p. 160- 165 °C: <sup>1</sup>H NMR (400 MHz, DMSO-d<sup>6</sup>)  $\delta$  8.40 (s, 1H), 7.87 (d, *J* = 1.6 Hz, 1H), 7.25 – 7.18 (m, 2H), 6.10 (t, *J* = 5.5 Hz, 1H), 3.15 (dd, *J* = 12.8, 6.7 Hz, 2H), 2.33 (s, 3H), 1.54 – 1.46 (m, 2H), 1.32 (s, 16H), 0.93 (t, *J* = 6.8 Hz, 3H). <sup>13</sup>C NMR (101 MHz, DMSO-d<sup>6</sup>)  $\delta$  174.8, 171.7, 138.9, 131.5, 131.1, 124.1, 122.5, 118.5, 36.8, 34.1, 31.8, 29.58,

29.56, 29.4, 29.36, 29.33, 29.2, 29.17, 29.11, 25.5, 24.9, 22.6, 22.0, 14.3. MS  $m/z$   $[M+H]^+$ , calcd for  $C_{19}H_{31}N_2OBr$  383.16; found, 383.35.

**(E)-1-Phenyl-3-styrylurea (3am):<sup>13</sup>**

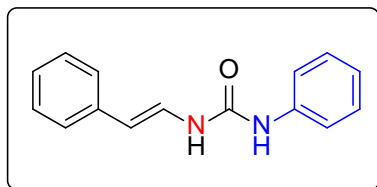

(100 mg, 0.675 mmol of cinnamic acid); TLC (Hexane/EtOAc, 7:3)  $R_f = 0.4$ ; Yield 83% ; white solid; m.p. 230-234 °C:  $^1H$  NMR (400 MHz, DMSO- $d_6$ , acquired at 60 °C)  $\delta$  8.69 (d,  $J = 10.8$  Hz, 4H), 7.37 (m, 6H), 6.99 (t,  $J = 7.1$  Hz, 1H), 6.87 (t,  $J = 8$  Hz, 1H), 5.94 (d,  $J = 14.6$  Hz, 2H).  $^{13}C$  NMR (101 MHz, DMSO- $d_6$ )  $\delta$  153.8, 141.3, 139.1, 130.6, 130.4, 127.2, 126.7, 126.5, 123.9, 120.3, 109.8. HRMS (ESI+TOF) calcd. for:  $C_{15}H_{15}N_2O$  239.1184  $[M+H]^+$ , found 239.1194.

**(E)-1-Hexadecyl-3-styrylurea (3an):<sup>14</sup>**

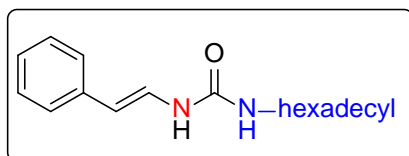

(100 mg, 0.675 mmol of cinnamic acid); TLC (Hexane/EtOAc, 7:3)  $R_f = 0.4$ ; Yield 76% ; white solid; m.p. 235-238 °C:  $^1H$  NMR (400 MHz,  $CDCl_3$ , acquired at 60 °C)  $\delta$  7.55 (d,  $J = 15.6$  Hz, 1H), 7.40 (dd,  $J = 6.8, 2.8$  Hz, 2H), 7.28 – 7.22 (m, 3H), 6.38 (d,  $J = 15.6$  Hz, 1H), 6.02 (s, 1H), 3.30 (dd,  $J = 13.1, 7.0$  Hz, 2H), 1.48 (m, 2H), 1.17 (m, 26H), 0.80 (t,  $J = 6.9$  Hz, 3H).  $^{13}C$  NMR (101 MHz,  $CDCl_3$ )  $\delta$  165.9, 140.7, 134.9, 129.5, 128.7, 127.7, 120.8, 39.8, 31.9, 29.7, 29.7, 29.6, 29.6, 29.5, 29.3, 29.3, 27.0, 22.7, 14.1. MS  $m/z$   $[M+H]^+$ , calcd for  $C_{25}H_{43}N_2O$  387.3375; found, 387.34.

**(E)-1-(Pyrimidin-2-yl)-3-styrylurea (3ao):**

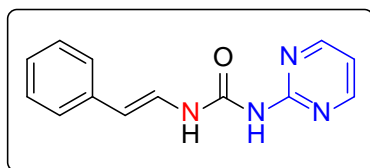

(100mg, 0.675 mmol of cinnamic acid); TLC (Hexane/EtOAc, 7:3)  $R_f = 0.4$ ; Yield 83% ; white solid; m.p. 270-273 °C:  $^1H$  NMR (400 MHz, DMSO- $d_6$ )  $\delta$  11.21 (d,  $J = 10.4$  Hz, 1H), 10.30 (s, 1H), 8.66 (d,  $J = 4.9$  Hz, 2H), 7.48 (dd,  $J = 14.7, 10.4$  Hz, 1H), 7.36 (d,  $J = 7.3$  Hz, 2H), 7.29 (t,  $J = 7.7$  Hz, 2H), 7.15 (m, 2H), 6.32 (d,  $J = 14.8$  Hz, 1H).  $^{13}C$  NMR (101 MHz, DMSO- $d_6$ )  $\delta$  158.6, 158.1, 151.9, 137.1, 129.1, 126.4, 125.4, 124.0, 115.6, 111.7. HRMS (ESI+TOF) calcd. for:  $C_{13}H_{13}N_4O$  241.1089  $[M+H]^+$ , found 241.1099.

### General Procedure for one pot conversion of carboxylic acid to carbamates and carbamothioates (4a-4n), (Scheme 3).

A solution of carboxylic acid **1** (0.500-0.819 mmol) and trichlorotriazine (TCT) (0.33 equiv.) in CH<sub>3</sub>CN (20 ml) was mixed with N-methylmorpholine (NMM) (1.4 equiv.) at room temperature and stirred for 30 minutes and monitored on TLC for the consumption of TCT. To the reaction mixture NaN<sub>3</sub> (1.4 equiv.) and DMAP (10 mol%) were added and reaction mixture stirred for 4-5 hrs at room temperature and observed for the formation of acyl azide **2** and consumption of benzoic acid by TLC. Now, the oxygen or sulphur based nucleophile (1.4 equiv.) was added and the reaction mixture was subjected to reflux at 80 °C in an oil bath, facilitating Curtius rearrangement leading to the *in situ* formation of isocyanate and click coupling. The product formation was monitored by TLC. Reaction mixture was subjected to rota vapour to evaporate CH<sub>3</sub>CN and then extraction with ethyl acetate. The organic layer was washed with water and dried over anhydrous Na<sub>2</sub>SO<sub>4</sub>. The organic layer was evaporated under pressure to obtain the crude product which was then purified by flash column chromatography using ethyl acetate and hexane to offerd the required products (**4a-4n**).

#### Phenyl (4-cyanophenyl)carbamate (**4a**):<sup>15</sup>

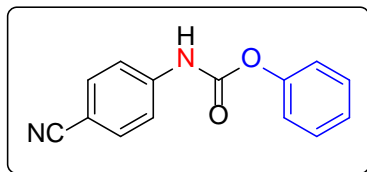

(100 mg, 0.680 mmol of 4-cyanobenzoic acid); TLC (Hexane/EtOAc, 7:3)  $R_f = 0.4$ ; Yield 62% ; white solid; m.p. 197-200 °C:  $^1\text{H NMR}$  (400 MHz, DMSO- $d_6$ )  $\delta$  10.78 (s, 1H), 7.79 (d,  $J = 8.7$  Hz, 2H), 7.70 (d,  $J = 8.7$  Hz, 2H), 7.44 (t,  $J = 7.9$  Hz, 2H), 7.28 (m, 3H).  $^{13}\text{C NMR}$  (101 MHz, DMSO- $d_6$ )  $\delta$  153.4, 152.2, 144.1, 133.9, 133.7, 119.6, 118.8, 113.9, 104.2. MS  $m/z$   $[\text{M}+\text{H}]^+$ , calcd for C<sub>14</sub>H<sub>11</sub>N<sub>2</sub>O<sub>2</sub> 239.0821; found, 239.09.

#### 4-(Trifluoromethoxy)phenyl (4-methoxyphenyl)carbamate (**4b**):

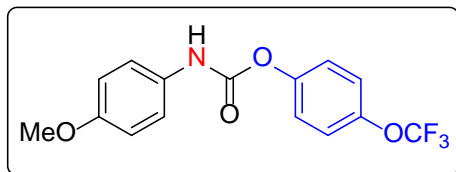

(100 mg, 0.657 mmol of 4-methoxybenzoic acid); TLC (Hexane/EtOAc, 7:3)  $R_f = 0.4$ ; Yield 68% ; white solid; m.p. 200-205 °C:  $^1\text{H NMR}$  (500 MHz, CDCl<sub>3</sub>, acquired at 60 °C)  $\delta$  7.36 (d,  $J = 8.2$  Hz, 2H), 7.25 (m, 4H), 6.92 (d,  $J = 8.6$  Hz, 2H), 6.80 (s, 1H), 3.83 (s, 3H).  $^{13}\text{C NMR}$  (101 MHz, CDCl<sub>3</sub>)  $\delta$  156.6, 151.5, 149.0,



146.4, 130.1, 122.8, 121.9, 120.9, 120.4 (d,  $J = 257.55$  Hz), 114.4, 55.5. HRMS (ESI+TOF) calcd. for:  $C_{15}H_{13}NO_4F_3$  328.0797  $[M+H]^+$ , found 328.0804.

#### 4-(Trifluoromethoxy)phenyl (4-cyanophenyl)carbamate (4c):

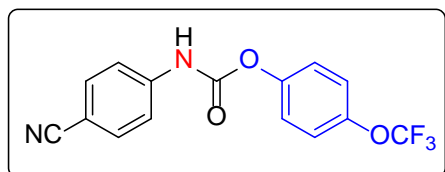

(100 mg, 0.680 mmol of 4-cyanobenzoic acid); TLC (Hexane/EtOAc, 7:3)  $R_f = 0.4$ ; Yield 65% ; white solid; m.p. 245-250 °C:  $^1H$  NMR (400 MHz, DMSO- $d_6$ )  $\delta$  10.82 (s, 1H), 7.78 – 7.67 (m, 4H), 7.41 (m, 4H).  $^{13}C$  NMR (101 MHz, DMSO- $d_6$ )  $\delta$  156.9, 152.2, 144.1, 140.9, 133.7, 122.8, 118.8, 118.7 (q,  $J = 233.31$  Hz), 116.6, 104.3. MS  $m/z$   $[M+H]^+$ , calcd for  $C_{15}H_{10}F_3N_2O_3$  323.0644; found, 323.08.

#### 4-Isopropylphenyl (4-methoxyphenyl)carbamate (4d):

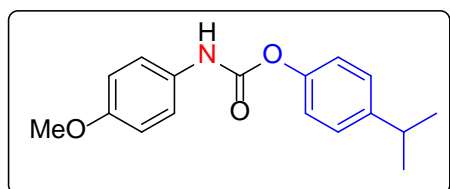

(100 mg, 0.657 mmol of 4-methoxybenzoic acid); TLC (Hexane/EtOAc, 7:3)  $R_f = 0.4$ ; Yield 65% ; white solid; m.p. 185-190 °C:  $^1H$  NMR (400 MHz, DMSO- $d_6$ , acquired at 60 °C)  $\delta$  9.82 (s, 1H), 7.51 (d,  $J = 9.0$  Hz, 2H), 7.27 (d,  $J = 8.5$  Hz, 2H), 7.14 (d,  $J = 8.5$  Hz, 2H), 6.92 (d,  $J = 9.0$  Hz, 2H), 3.74 (s, 3H), 2.92 (m, 1H), 1.25 (s, 3H), 1.23 (s, 3H).  $^{13}C$  NMR (101 MHz, DMSO- $d_6$ )  $\delta$  155.7, 152.5, 149.1, 145.8, 132.2, 127.5, 122.1, 120.5, 114.5, 55.5, 33.4, 24.3. HRMS (ESI+TOF) calcd. for:  $C_{17}H_{20}NO_3$  286.1443  $[M+H]^+$ , found 286.1454.

#### Butyl (4-methoxyphenyl)carbamate (4e):<sup>16</sup>

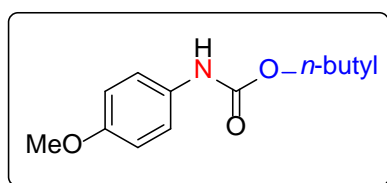

(100 mg, 0.657 mmol of 4-methoxybenzoic acid); TLC (Hexane/EtOAc, 7:3)  $R_f = 0.4$ ; Yield 70% ; white solid; m.p. 47-50 °C:  $^1H$  NMR (400 MHz, DMSO- $d_6$ )  $\delta$  9.21 (s, 1H), 7.27 (d,  $J = 8.1$  Hz, 2H), 6.67 (d,  $J = 9.1$  Hz, 2H), 3.89 (t,  $J = 6.6$  Hz, 2H), 3.51 (s, 3H), 1.44 – 1.37 (m, 2H), 1.20 (dt,  $J = 9.2, 7.4$  Hz, 2H), 0.72 (t,  $J = 7.4$  Hz, 3H).  $^{13}C$  NMR (101 MHz, DMSO- $d_6$ )  $\delta$  155.1, 154.3, 132.8, 120.1, 114.1, 64.1, 55.3, 31.1, 19.1, 13.8. HRMS (ESI+TOF) calcd. for:  $C_{12}H_{18}NO_3$  224.1287  $[M+H]^+$ , found 224.1286.

#### Butyl (4-cyanophenyl)carbamate (4f):<sup>17</sup>

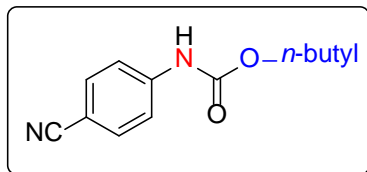

(100 mg, 0.680 mmol of 4-cyanobenzoic acid); TLC (Hexane/EtOAc, 7:3)  $R_f = 0.4$ ; Yield 67% ; white solid; m.p.: 55-60 °C:  $^1\text{H}$  NMR (400 MHz, DMSO- $d_6$ )  $\delta$  10.09 (s, 1H), 7.69 (d,  $J = 8.7$  Hz, 2H), 7.64 (d,  $J = 8.7$  Hz, 2H), 4.09 (t,  $J = 6.6$  Hz, 2H), 1.61 – 1.57 (m, 2H), 1.36 (m, 2H), 0.89 (t,  $J = 7.3$  Hz, 3H).  $^{13}\text{C}$  NMR (101 MHz, DMSO- $d_6$ )  $\delta$  153.7, 144.1, 133.5, 119.5, 118.4, 104.4, 64.7, 30.8, 18.9, 13.8. HRMS (ESI+TOF) calcd. for:  $\text{C}_{12}\text{H}_{15}\text{N}_2\text{O}_2$  219.1134  $[\text{M}+\text{H}]^+$ , found 219.1134.

#### Isopropyl (4-cyanophenyl)carbamate (4g):<sup>17</sup>

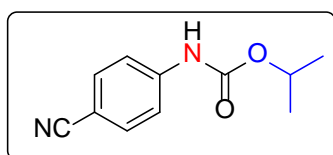

(100 mg, 0.680 mmol of 4-cyanobenzoic acid); TLC (Hexane/EtOAc, 7:3)  $R_f = 0.4$ ; Yield 65% ; white solid; m.p.: 120-125 °C:  $^1\text{H}$  NMR (400 MHz, DMSO- $d_6$ )  $\delta$  8.06 (d,  $J = 7.3$  Hz, 2H), 7.97 (d,  $J = 7.7$  Hz, 2H), 5.15 (dt,  $J = 12.4, 6.2$  Hz, 1H), 1.32 (d,  $J = 6.2$  Hz, 6H).  $^{13}\text{C}$  NMR (101 MHz, DMSO- $d_6$ )  $\delta$  164.4, 134.5, 133.1, 130.1, 118.5, 115.7, 69.6, 21.9. MS  $m/z$   $[\text{M}+\text{H}]^+$ , calcd for  $\text{C}_{11}\text{H}_{13}\text{N}_2\text{O}_2$  205.0977; found, 205.10.

#### S-Phenyl (4-methoxyphenyl)carbamothioate (4h):<sup>18</sup>

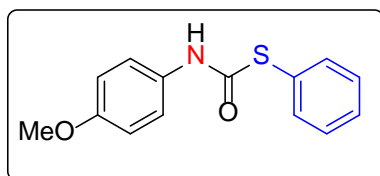

(100 mg, 0.657 mmol of 4-methoxybenzoic acid); TLC (Hexane/EtOAc, 7:3)  $R_f = 0.4$ ; Yield 82% ; white solid; m.p.160-165 °C:  $^1\text{H}$  NMR (400 MHz,  $\text{CDCl}_3$ , acquired at 60 °C)  $\delta$  7.57 (m, 2H), 7.42 (s, 1H), 7.39 – 7.36 (m, 3H), 7.24 (d,  $J = 9.0$  Hz, 2H), 6.78 (d,  $J = 9.0$  Hz, 2H), 3.72 (s, 3H).  $^{13}\text{C}$  NMR (101 MHz,  $\text{CDCl}_3$ )  $\delta$  136.9, 131.1, 130.8, 129.7, 115.6, 56.9. . HRMS (ESI+TOF) calcd. for:  $\text{C}_{14}\text{H}_{14}\text{NO}_2\text{S}$  260.0745  $[\text{M}+\text{H}]^+$ , found 260.0757.

#### S-Phenyl (4-cyanophenyl)carbamothioate (4i):

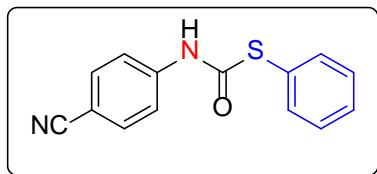

(100 mg, 0.680 mmol of 4-cyanobenzoic acid); TLC (Hexane/EtOAc, 7:3)  $R_f = 0.4$ ; Yield 85% ; white solid; m.p.200-205 °C:  $^1\text{H}$  NMR (400 MHz, DMSO- $d_6$ )  $\delta$  11.00 (s, 1H), 7.78 (d,  $J = 8.7$  Hz, 2H), 7.68 (d,  $J = 8.7$  Hz, 2H), 7.58 – 7.52 (m, 2H), 7.47 (d,  $J = 6.4$  Hz, 3H).  $^{13}\text{C}$  NMR (101 MHz, DMSO- $d_6$ )  $\delta$  153.4, 136.2, 133.9, 133.7, 129.9,

128.0, 127.6, 118.8, 113.9, 96.0. HRMS (ESI+TOF) calcd. for: C<sub>14</sub>H<sub>11</sub>N<sub>2</sub>OS 255.0592 [M+H]<sup>+</sup>, found 255.0604.

**S-Dodecyl (4-methoxyphenyl)carbamothioate (4j):**

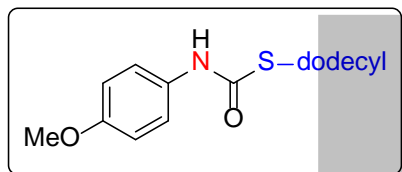

(100 mg, 0.657 mmol of 4-methoxybenzoic acid); TLC (Hexane/EtOAc, 7:3) R<sub>f</sub> = 0.4; Yield 92% ; white solid; m.p.200-205 °C: <sup>1</sup>H NMR (400 MHz, CDCl<sub>3</sub>) δ 7.32 (d, *J* = 8.6 Hz, 2H), 6.83 (d, *J* = 8.5 Hz, 2H), 3.77 (s, 3H), 3.02 – 2.85 (m, 2H), 1.69 – 1.59 (m, 2H), 1.36 (s, 2H), 1.27 (m, 16H), 0.88 (m, 3H). <sup>13</sup>C NMR (101 MHz, CDCl<sub>3</sub>) δ 114.2, 55.4, 31.9, 30.3, 30.2, 29.6, 29.6, 29.6, 29.5, 29.3, 29.1, 28.8, 22.7, 14.1. HRMS (ESI+TOF) calcd. for: C<sub>20</sub>H<sub>34</sub>NO<sub>2</sub>S 352.2310 [M+H]<sup>+</sup>, found 352.2317.

**S-Dodecyl (4-cyanophenyl)carbamothioate (4k):**

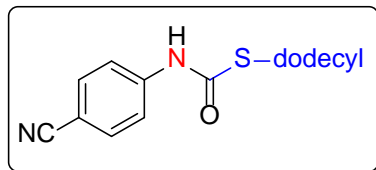

(100 mg, 0.680 mmol of 4-cyanobenzoic acid); TLC (Hexane/EtOAc, 7:3) R<sub>f</sub> = 0.4; Yield 89% ; white solid; m.p.200-205 °C: <sup>1</sup>H NMR (400 MHz, DMSO-d<sub>6</sub>) δ 10.72 (s, 1H), 7.74 (d, *J* = 8.7 Hz, 2H), 7.68 (d, *J* = 8.9 Hz, 2H), 2.89 (t, *J* = 7.2 Hz, 2H), 1.60 – 1.52 (m, 2H), 1.33 (m, 2H), 1.21 (m, 16H), 0.83 (t, *J* = 6.8 Hz, 3H). <sup>13</sup>C NMR (101 MHz, DMSO-d<sub>6</sub>) δ 166.3, 143.4, 133.7, 119.1, 105.3, 31.7, 30.2, 29.5, 29.5, 29.4, 29.3, 29.2, 28.9, 28.5, 22.5, 14.3. HRMS (ESI+TOF) calcd. for: C<sub>20</sub>H<sub>31</sub>N<sub>2</sub>OS 347.2157 [M+H]<sup>+</sup>, found 347.2159.

**S-Hexadecyl (4-methoxyphenyl)carbamothioate (4l):**

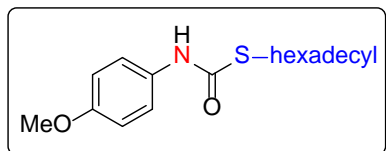

(100 mg, 0.657 mmol of 4-methoxybenzoic acid); TLC (Hexane/EtOAc, 7:3) R<sub>f</sub> = 0.4; Yield 92% ; white solid; m.p.233-237 °C: <sup>1</sup>H NMR (400 MHz, CDCl<sub>3</sub>) δ 7.31 (d, *J* = 8.6 Hz, 2H), 7.03 (s, 1H), 6.85 (d, *J* = 8.8 Hz, 2H), 3.79 (s, 3H), 2.95 (t, *J* = 7.3 Hz, 2H), 1.67 – 1.62 (m, 2H), 1.39 (m, 2H), 1.26 (m, 24H), 0.89 (t, *J* = 6.5 Hz, 3H). <sup>13</sup>C NMR (101 MHz, CDCl<sub>3</sub>) δ 114.2, 55.4, 31.9, 30.3, 29.7, 29.6, 29.6, 29.6, 29.5, 29.38, 29.1, 28.8, 22.7, 14.1. HRMS (ESI+TOF) calcd. for: C<sub>24</sub>H<sub>42</sub>NO<sub>2</sub>S 408.2936 [M+H]<sup>+</sup>, found 408.2938.

#### Phenyl (*E*)-styrylcarbamate (**4m**):

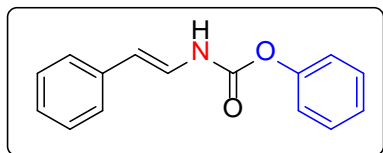

(100 mg, 0.675 mmol of cinnamic acid); TLC (Hexane/EtOAc, 7:3)  $R_f = 0.4$ ; Yield 64% ; white solid; m.p.157-160 °C:  $^1\text{H}$  NMR (400 MHz, DMSO- $d_6$ )  $\delta$  10.34 (d,  $J = 10.0$  Hz, 1H), 7.45 – 7.41 (m, 2H), 7.35 (d,  $J = 7.4$  Hz, 2H), 7.29 (t,  $J = 7.3$  Hz, 3H), 7.21 (m, 3H), 7.15 (m, 1H), 6.18 (d,  $J = 14.7$  Hz, 1H).  $^{13}\text{C}$  NMR (101 MHz, DMSO- $d_6$ )  $\delta$  157.7, 136.8, 129.9, 129.8, 129.1, 126.5, 126.0, 125.5, 125.1, 122.2, 119.2, 115.6. HRMS (ESI+TOF) calcd. for:  $\text{C}_{15}\text{H}_{14}\text{NO}_2$  240.1025  $[\text{M}+\text{H}]^+$ , found 240.1030.

#### S-Hexadecyl (*E*)-styrylcarbamothioate (**4n**):

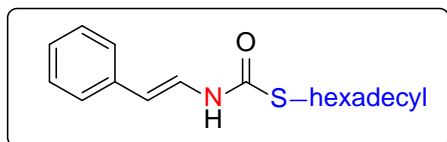

(100 mg, 0.675 mmol of cinnamic acid); TLC (Hexane/EtOAc, 7:3)  $R_f = 0.4$ ; Yield 84% ; white solid; m.p.290-295 °C:  $^1\text{H}$  NMR (400 MHz,  $\text{CDCl}_3$ , acquired at 60 °C)  $\delta$  7.33 (m, 1H), 7.26 (m, 3H), 7.13 (m, 2H), 6.03 (d,  $J = 14.2$  Hz, 1H), 2.98 (t,  $J = 5.5$  Hz, 2H), 1.64 (d,  $J = 5.7$  Hz, 2H), 1.39 (s, 2H), 1.27 (m, 24H), 0.88 (s, 3H).  $^{13}\text{C}$  NMR (101 MHz,  $\text{CDCl}_3$ )  $\delta$  166.0, 135.9, 128.6, 126.6, 125.5, 122.7, 112.1, 31.9, 30.2, 30.1, 29.6, 29.5, 29.4, 29.3, 29.1, 28.7, 22.6, 14.0. HRMS (ESI+TOF) calcd. for:  $\text{C}_{25}\text{H}_{42}\text{NOS}$  404.2987  $[\text{M}+\text{H}]^+$ , found 404.2992.

#### Procedure for one pot conversion of carboxylic acid to amides (**5**), (Scheme 4).

A solution of carboxylic acid **1** (0.500-0.819 mmol) and trichlorotriazine (TCT) (0.33 equiv.) in  $\text{CH}_3\text{CN}$  (20 ml) was mixed with N-methylmorpholine (NMM) (, 1.4 equiv.) at room temperature and stirred for 30 minutes and monitored on TLC for the consumption of TCT. To the reaction mixture  $\text{NaN}_3$  (1.4 equiv.) and DMAP (10 mol%) were added and reaction mixture stirred for 4-5 hrs at room temperature and observed for the formation of acyl azide **2** and consumption of benzoic acid by TLC. Now, the carboxylic acid (1.4 equiv.) was added and the reaction mixture was subjected to reflux at 80 °C in an oil bath, facilitating Curtius rearrangement leading to the *in situ* formation of isocyanate and click coupling. The product formation was monitored by TLC. Reaction mixture was subjected to rota vapour to evaporate  $\text{CH}_3\text{CN}$  and then extraction with ethyl acetate. The organic layer was washed with water and dried over anhydrous  $\text{Na}_2\text{SO}_4$ . The organic layer was evaporated under pressure to obtain the

crude product which was then purified by flash column chromatography using ethyl acetate and hexane to offerd the required products (5).

#### 4-Methoxy-N-undecylbenzamide (5):<sup>19</sup>

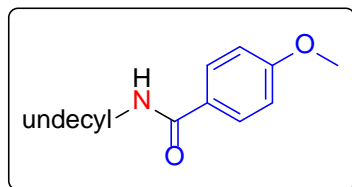

(100 mg, 0.500 mmol of dodecanoic acid ); TLC (Hexane/EtOAc, 7:3)  $R_f = 0.4$ ; Yield 54% ; white solid; m.p.250-260 °C:  $^1\text{H NMR}$  (400 MHz, DMSO- $d_6$ )  $\delta$  7.93 (d,  $J = 8.5$  Hz, 2H), 7.02 (d,  $J = 8.5$  Hz, 2H), 3.85 (s, 3H), 2.20 (t,  $J = 8\text{Hz}$  , 2H), 1.52 (m, 2H), 1.25 (m, 16H), 0.87 (t,  $J = 8\text{Hz}$  3H).  $^{13}\text{C NMR}$  (101 MHz, DMSO- $d_6$ )  $\delta$  174.9, 167.5, 163.2, 131.8, 123.7, 114.1, 55.8, 34.1, 31.8, 29.5, 29.4, 29.3, 29.2, 29.1, 25.0, 22.6, 14.3. MS  $m/z$   $[\text{M}+\text{H}]^+$ , calcd for  $\text{C}_{19}\text{H}_{32}\text{NO}_2$  306.2433; found, 306.24.

#### Procedure for one pot conversion of carboxylic acid to mono-substituted carbamides (6), (Scheme 4).

A solution of carboxylic acid **1** (0.500-0.819 mmol) and trichlorotriazine (TCT) (0.33 equiv.) in  $\text{CH}_3\text{CN}$  (20 ml) was mixed with N-methylmorpholine (NMM) (1.4 equiv.) at room temperature and stirred for 30 minutes and monitored on TLC for the consumption of TCT. To the reaction mixture  $\text{NaN}_3$  (1.4 equiv.) and DMAP (10 mol%) were added and reaction mixture stirred for 4-5 hrs at room temperature and observed for the formation of acyl azide **2** and consumption of benzoic acid by TLC. Now, the aq.  $\text{NH}_4\text{OH}$  (1.4 equiv.) was added and the reaction mixture was subjected to reflux at 80 °C in an oil bath, facilitating Curtius rearrangement leading to the *in situ* formation of isocyanate and click coupling. The product formation was monitored by TLC. Reaction mixture was subjected to rota vapour to evaporate  $\text{CH}_3\text{CN}$  and then extraction with ethyl acetate. The organic layer was washed with water and dried over anhydrous  $\text{Na}_2\text{SO}_4$ . The organic layer was evaporated under pressure to obtain the crude product which was then purified by flash column chromatography using ethyl acetate and hexane to offerd the required products (6).

#### 1-(4-Cyanophenyl)urea (6):<sup>20</sup>

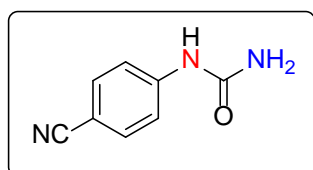

(100 mg, 0.680 mmol of 4-cyanobenzoic acid); TLC (Hexane/EtOAc, 7:3)  $R_f = 0.4$ ; Yield 57% ; white solid; m.p. 206-209 °C:  $^1\text{H NMR}$  (400 MHz, DMSO- $d_6$ ,)  $\delta$  8.19 (s, 1H), 6.81 (d,  $J = 8.6$  Hz, 2H), 6.74

(d,  $J = 8.6$  Hz, 2H), 5.24 (s, 2H).  $^{13}\text{C}$  NMR (101 MHz, DMSO- $d_6$ )  $\delta$  166.9, 138.7, 132.8, 128.7, 118.8, 114.1. HRMS (ESI+TOF) calcd. for:  $\text{C}_8\text{H}_8\text{N}_3\text{O}$  162.0667  $[\text{M}+\text{H}]^+$ , found 162.0670.

#### General Procedure for one pot conversion of carboxylic acid to amines (7a-7e), (Scheme 4).

A solution of carboxylic acid **1** (0.500-0.819 mmol) and trichlorotriazine (TCT) (0.33 equiv.) in  $\text{CH}_3\text{CN}$  (20 ml) was mixed with N-methylmorpholine (NMM) (1.4 equiv.) at room temperature and stirred for 30 minutes and monitored on TLC for the consumption of TCT. To the reaction mixture  $\text{NaN}_3$  (11.4 equiv.) and DMAP (10 mol%) were added and reaction mixture stirred for 4-5 hrs at room temperature and observed for the formation of acyl azide **2** and consumption of benzoic acid by TLC. Now,  $\text{H}_2\text{O}$  (1.4 equiv.) was added and the reaction mixture was subjected to reflux at  $80^\circ\text{C}$  in an oil bath, facilitating Curtius rearrangement leading to the *in situ* formation of isocyanate and click coupling. The product formation was monitored by TLC. Reaction mixture was subjected to rota vapour to evaporate  $\text{CH}_3\text{CN}$  and then extraction with ethyl acetate. The organic layer was washed with water and dried over anhydrous  $\text{Na}_2\text{SO}_4$ . The organic layer was evaporated under pressure to obtain the crude product which was then purified by flash column chromatography using ethyl acetate and hexane to offerd the required products (7a-7e).

#### 4-Aminobenzonitrile (7a)<sup>21</sup>:

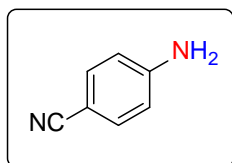

(100 mg, 0.680 mmol of 4-cyanobenzoic acid); TLC (Hexane/EtOAc, 7:3)  $R_f = 0.4$ ; Yield 95% ; white solid; m.p.  $83-85^\circ\text{C}$ :  $^1\text{H}$  NMR (400 MHz, DMSO- $d_6$ )  $\delta$  7.26 (d,  $J = 8.3$  Hz, 2H), 6.51 (d,  $J = 8.3$  Hz, 2H), 5.95 (s, 2H).  $^{13}\text{C}$  NMR (101 MHz, DMSO- $d_6$ )  $\delta$  153.4, 133.8, 121.1, 114.0, 96.2. HRMS (ESI+TOF) calcd. for:  $\text{C}_7\text{H}_7\text{N}_2$  119.0609  $[\text{M}+\text{H}]^+$ , found 119.0603.

#### 4-Chloroaniline (7b)<sup>22</sup>:

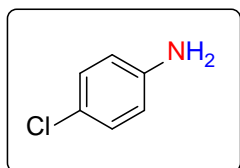

(100 mg, 0.645 mmol of 4-chlorobenzoic acid); TLC (Hexane/EtOAc, 7:3)  $R_f = 0.6$ ; Yield 92% ; white solid; m.p.  $70-75^\circ\text{C}$ :  $^1\text{H}$  NMR (400 MHz, DMSO- $d_6$ )  $\delta$  8.81 (s, 1H), 7.58 (d,  $J = 8.9$  Hz, 2H), 7.41 (d,  $J = 8.8$  Hz, 2H).  $^{13}\text{C}$  NMR (101 MHz, DMSO- $d_6$ )  $\delta$  152.8, 139.0, 129.0, 126.0, 120.3. MS  $m/z$  (M+H)<sup>+</sup>: calcd for  $\text{C}_6\text{H}_7\text{ClN}$  128.0267; found, 128.02.

**Aniline (7c)**<sup>23</sup>: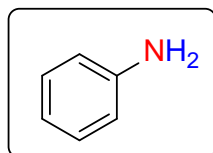

(100 mg, 0.819 mmol of benzoic acid); TLC (Hexane/EtOAc, 7:3)  $R_f = 0.7$ ; Yield 93% ;  $^1\text{H NMR}$  (400 MHz, DMSO)  $\delta$  7.04 (m, 2H), 6.61 (m, 2H), 6.54 (td,  $J = 7.3, 3.7$  Hz, 1H), 5.00 (s, 2H).  $^{13}\text{C NMR}$  (101 MHz, DMSO)  $\delta$  149.0, 129.3, 116.2, 114.4. MS  $m/z$  (M+H)<sup>+</sup>: calcd for C<sub>6</sub>H<sub>8</sub>N 94.0657; found, 94.06.

**4-Methoxyaniline (7d)**<sup>23</sup>: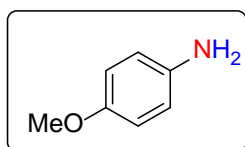

(100 mg, 0.657 mmol of 4-methoxybenzoic acid); TLC (Hexane/EtOAc, 7:3)  $R_f = 0.4$ ; Yield 94% ; white solid; m.p. 55-60 °C:  $^1\text{H NMR}$  (400 MHz, DMSO-d<sub>6</sub>)  $\delta$  6.68 (d,  $J = 8$  Hz, 2H), 6.57 (d,  $J = 8$  Hz, 2H), 4.60 (s, 2H), 3.64 (s, 3H).  $^{13}\text{C NMR}$  (101 MHz, DMSO)  $\delta$  151.2, 142.7, 115.5, 114.9, 55.6. HRMS (ESI+TOF) calcd. for: C<sub>7</sub>H<sub>10</sub>NO 124.0762 [M+H]<sup>+</sup>, found 124.0762.

**Undecan-1-amine (7e)**<sup>24</sup>: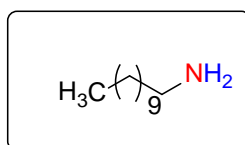

(100 mg, 0.500 mmol of dodecanoic acid); TLC (Hexane/EtOAc, 8:2)  $R_f = 0.8$ ; Yield 87% ; white solid; m.p. 15-20 °C:  $^1\text{H NMR}$  (400 MHz, DMSO-d<sub>6</sub>)  $\delta$  2.16 (t,  $J = 7.1$  Hz, 2H), 1.46 (m, 2H), 1.22 (m, 16H), 0.83 (t,  $J = 8$  Hz, 3H).  $^{13}\text{C NMR}$  (101 MHz, CDCl<sub>3</sub>)  $\delta$  40.8, 31.9, 30.0, 29.6, 29.5, 29.4, 29.3, 29.2, 29.1, 26.9, 24.8, 22.7, 14.1. MS  $m/z$  (M+H)<sup>+</sup>: calcd for C<sub>11</sub>H<sub>26</sub>N 172.2065; found, 172.21.

**General Procedure for late stage functionalization of natural products and drugs (8a-8e), (Scheme 5).**

A solution of carboxylic acid **1** (0.500-0.819 mmol) and trichlorotriazine (TCT) (0.33 equiv.) in CH<sub>3</sub>CN (20 ml) was mixed with N-methylmorpholine (NMM) (1.4 equiv.) at room temperature and stirred for 30 minutes and monitored on TLC for the consumption of TCT. To the reaction mixture NaN<sub>3</sub> (1.4 equiv.) and DMAP (10 mol%) were added and reaction mixture stirred for 4-5 hrs at room temperature and observed for the formation of acyl azide **2** and consumption of benzoic acid by TLC. Now, the natural products (podophyllotoxin, eugenol, diosgenin, geraniol) and drug (fluvoxamine) (1.4 equiv.) was added and the reaction mixture was subjected to reflux at 80 °C in an oil bath, facilitating Curtius rearrangement leading to the *in situ*

formation of isocyanate and click coupling. The product formation was monitored by TLC. Reaction mixture was subjected to rota vapour to evaporate CH<sub>3</sub>CN and then extraction with ethyl acetate. The organic layer was washed with water and dried over anhydrous Na<sub>2</sub>SO<sub>4</sub>. The organic layer was evaporated under pressure to obtain the crude product which was then purified by flash column chromatography using ethyl acetate and hexane to offerd the required products (8a-8e).

**8-Oxo-9-(3,4,5-trimethoxyphenyl)-5,5a,6,8,8a,9-hexahydrofuro[3',4':6,7]naphtho[2,3-d][1,3]dioxol-5-yl (4-cyanophenyl)carbamate (8a):**

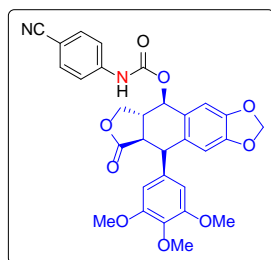

(100 mg, 0.680 mmol of 4-cyanobenzoic acid); TLC (Hexane/EtOAc, 7:3)  $R_f = 0.4$ ; Yield 68% ; white solid; m.p.323-327 °C:  $^1\text{H NMR}$  (400 MHz, CDCl<sub>3</sub>)  $\delta$  7.63 (d,  $J = 8.8$  Hz, 2H), 7.56 (d,  $J = 8.8$  Hz, 2H), 7.29 (s, 1H), 6.89 (s, 1H), 6.55 (s, 1H), 6.40 (s, 2H), 5.99 (dd,  $J = 5.8, 1.2$  Hz, 2H), 5.93 (d,  $J = 8.6$  Hz, 1H), 4.63 (d,  $J = 3.8$  Hz, 1H), 4.46 (dd,  $J = 9.2, 6.4$  Hz, 1H), 4.26 (t,  $J = 9.8$  Hz, 1H), 3.81 (s, 3H), 3.75 (s, 6H), 2.96 (d,  $J = 4.1$  Hz, 1H).  $^{13}\text{C NMR}$  (101 MHz, CDCl<sub>3</sub>)  $\delta$  173.9, 153.2, 152.5, 148.1, 147.6, 142.1, 136.9, 135.1, 133.3, 132.2, 128.2, 118.9, 118.5, 109.7, 108.1, 106.9, 106.1, 101.6, 74.8, 71.3, 60.7, 56.0, 45.2, 43.6, 38.5. HRMS (ESI+TOF) calcd. for: C<sub>30</sub>H<sub>26</sub>N<sub>2</sub>O<sub>9</sub>Na 581.1536 [M+Na]<sup>+</sup>, found 581.1536.

**4-Allyl-2-methoxyphenyl (4-cyanophenyl)carbamate (8b):**

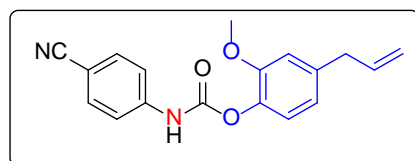

(100 mg, 0.680 mmol of 4-cyanobenzoic acid); TLC (Hexane/EtOAc, 7:3)  $R_f = 0.4$ ; Yield 65% ; white solid; m.p.285-290 °C:  $^1\text{H NMR}$  (500 MHz, DMSO-d<sub>6</sub>, acquired at 60 °C)  $\delta$  10.59 (s, 1H), 7.76 (d,  $J = 8.7$  Hz, 2H), 7.70 (d,  $J = 8.5$  Hz, 2H), 7.12 (d,  $J = 8.0$  Hz, 1H), 6.99 (s, 1H), 6.81 (d,  $J = 8.0$  Hz, 1H), 6.01 (td,  $J = 16.8, 6.8$  Hz, 1H), 5.11 (dd,  $J = 25.3, 13.5$  Hz, 2H), 3.80 (s, 3H), 3.40 (d,  $J = 6.6$  Hz, 2H).  $^{13}\text{C NMR}$  (101 MHz, DMSO-d<sub>6</sub>)  $\delta$  151.7, 151.6, 143.7, 139.3, 137.8, 137.7, 133.8, 123.4, 120.7, 119.4, 118.8, 116.4, 113.5, 105.2, 56.2, 39.8. HRMS (ESI+TOF) calcd. for: C<sub>18</sub>H<sub>17</sub>N<sub>2</sub>O<sub>3</sub> 309.1239 [M+H]<sup>+</sup>, found 309.1248.



**5',6a,9-Trimethyl-1,3,3',4,4',5,5',6,6a,6b,6',7,8,8a,8b,9,11a,12,12a,12b-icosahydrospiro[naphtho[2',1':4,5]indeno[2,1-b]furan-10,2'-pyran]-4-yl(4-methoxyphenyl)carbamate (8c):**

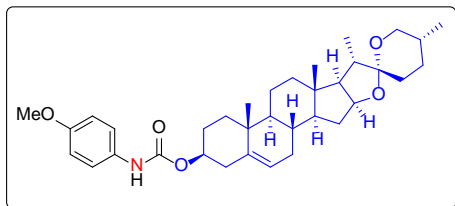

(100 mg, 0.657 mmol of 4-methoxybenzoic acid); TLC (Hexane/EtOAc, 7:3)  $R_f = 0.4$ ; Yield 59% ; white solid; m.p.325-330 °C:  $^1\text{H NMR}$  (400 MHz,  $\text{CDCl}_3$ )  $\delta$  7.30 (d,  $J = 10.0$  Hz, 2H), 6.86 (d,  $J = 8.9$  Hz, 2H), 6.53 (s, 1H), 5.41 (d,  $J = 4.9$  Hz, 1H), 4.66 – 4.55 (m, 1H), 4.44 (dd,  $J = 14.9, 7.4$  Hz, 1H), 3.80 (s, 3H), 3.54 – 3.46 (m, 1H), 3.40 (t,  $J = 10.9$  Hz, 1H), 2.45 (dd,  $J = 13.0, 3.1$  Hz, 1H), 2.34 (t,  $J = 11.4$  Hz, 1H), 2.00 (d,  $J = 5.0$  Hz, 2H), 1.92 – 1.85 (m, 2H), 1.82 – 1.78 (m, 1H), 1.74 (s, 1H), 1.70 (d,  $J = 4.6$  Hz, 1H), 1.67 – 1.57 (m, 6H), 1.55 – 1.44 (m, 4H), 1.22 (m, 7H), 1.06 (s, 3H), 1.00 (d,  $J = 6.9$  Hz, 3H), 0.81 (d,  $J = 4$  Hz, 3H).  $^{13}\text{C NMR}$  (101 MHz,  $\text{CDCl}_3$ )  $\delta$  155.8, 153.4, 139.6, 131.1, 122.4, 120.4, 114.2, 109.3, 80.8, 66.8, 62.0, 56.4, 55.5, 49.9, 41.6, 40.2, 39.7, 38.4, 36.9, 36.7, 32.0, 31.8, 31.4, 30.3, 29.7, 28.8, 28.0, 20.8, 19.3, 17.1, 16.3, 14.5. HRMS (ESI+TOF) calcd. for:  $\text{C}_{35}\text{H}_{50}\text{NO}_5$  564.3689  $[\text{M}+\text{H}]^+$ , found 564.3689.

**(E)-1-(4-Cyanophenyl)-3-(2-(((5-methoxy-1-(4-(trifluoromethyl)phenyl)pentylidene)amino)oxy)ethyl)urea (8d):**

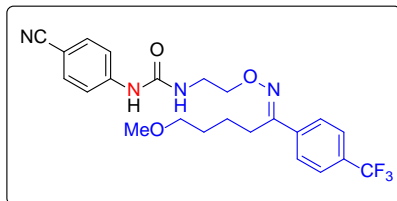

(100 mg, 0.680 mmol of 4-cyanobenzoic acid); TLC (Hexane/EtOAc, 7:3)  $R_f = 0.4$ ; Yield 77% ; white solid; m.p.120-123 °C:  $^1\text{H NMR}$  (500 MHz,  $\text{DMSO-d}_6$ , acquired at 60 °C)  $\delta$  9.01 (s, 1H), 7.86 (d,  $J = 7.6$  Hz, 2H), 7.72 (d,  $J = 7.7$  Hz, 2H), 7.61 (dt,  $J = 8.7, 7.2$  Hz, 4H), 6.38 (t,  $J = 5.1$  Hz, 1H), 4.26 (s, 2H), 3.50 (s, 2H), 3.27 (s, 2H), 3.17 (s, 3H), 2.81 (s, 2H), 1.52 (s, 4H).  $^{19}\text{F NMR}$  (376 MHz,  $\text{DMSO-d}_6$ )  $\delta$  -61.37.  $^{13}\text{C NMR}$  (101 MHz,  $\text{DMSO-d}_6$ )  $\delta$  157.7, 155.1, 145.3, 139.5, 133.51, 127.3, 127.2 (q,  $J = 31.31$  Hz), 125.79-125.76 (d,  $J = 3.03$  Hz), 119.8, 117.9, 103.0, 73.3, 71.8, 58.1, 39.3, 29.3, 25.8, 23.1. HRMS (ESI+TOF) calcd. for:  $\text{C}_{23}\text{H}_{26}\text{N}_4\text{O}_3\text{F}_3$  463.1957  $[\text{M}+\text{H}]^+$ , found 463.1961.

**(E)-3,7-Dimethylocta-2,6-dien-1-yl phenylcarbamate (8e):<sup>25</sup>**

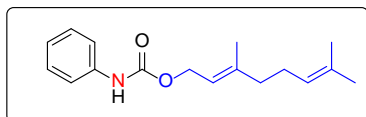

(100 mg, 0.819 mmol of benzoic acid); TLC (Hexane/EtOAc, 7:3)  $R_f = 0.4$ ; Yield 61% ; white solid; m.p.80-85 °C:  $^1\text{H NMR}$

(400 MHz, CDCl<sub>3</sub>)  $\delta$  7.30 (d,  $J$  = 7.9 Hz, 2H), 7.22 (t,  $J$  = 7.7 Hz, 2H), 6.97 (t,  $J$  = 7.2 Hz, 1H), 6.57 (s, 1H), 5.33 (t,  $J$  = 6.9 Hz, 1H), 5.02 (m, 1H), 4.62 (d,  $J$  = 7.1 Hz, 2H), 2.06 – 1.96 (m, 4H), 1.67 (s, 3H), 1.61 (s, 3H), 1.53 (s, 3H). <sup>13</sup>C NMR (101 MHz, CDCl<sub>3</sub>)  $\delta$  153.6, 142.6, 138.0, 131.9, 129.0, 123.7, 123.3, 118.6, 118.4, 62.0, 39.5, 26.3, 25.7, 22.7, 17.7, 16.5. HRMS (ESI+TOF) calcd. for: C<sub>17</sub>H<sub>23</sub>NO<sub>2</sub>Na 296.1626 [M+H]<sup>+</sup>, found 296.1634.

### General Procedure for gram scale reaction

A solution of benzoic acid **1a** (5 g, 40.98 mmol) and trichlorotriazine (TCT) (2.48 g, 13.52 mmol) in CH<sub>3</sub>CN (50 ml) was mixed with *N*-methylmorpholine (NMM) (5.79 g, 57.37 mmol) at room temperature and stirred for 30 minutes and monitored on TLC for the consumption of TCT. To the reaction mixture NaN<sub>3</sub> (3.9 g, 57.37 mmol) and DMAP (10 mol%) were added and reaction mixture stirred for 4-5 hrs at room temperature and observed for the formation of acyl azide **2** and consumption of benzoic acid by TLC. Then, the aniline (5.3 g, 57.37 mmol) was added and the reaction mixture was

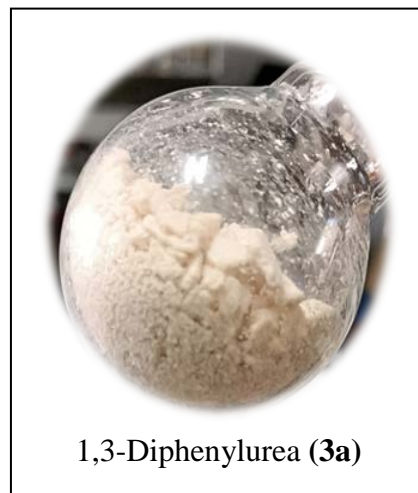

subjected to reflux at 80 °C in an oil bath, facilitating Curtius rearrangement leading to the *in situ* formation of isocyanate and click coupling. The product formation was monitored by TLC. Reaction mixture was subjected to rota vapour to evaporate CH<sub>3</sub>CN and then extraction with ethyl acetate. The organic layer was washed with water and dried over anhydrous Na<sub>2</sub>SO<sub>4</sub>. The organic layer was evaporated under pressure to obtain the crude product which was then purified by flash column chromatography using ethyl acetate and hexane to offered the required product **3a** (yield 7.4 g, 86 %).

## Spectral copies of synthesized compounds

### <sup>1</sup>H-NMR of 1,3-diphenylurea (3a)

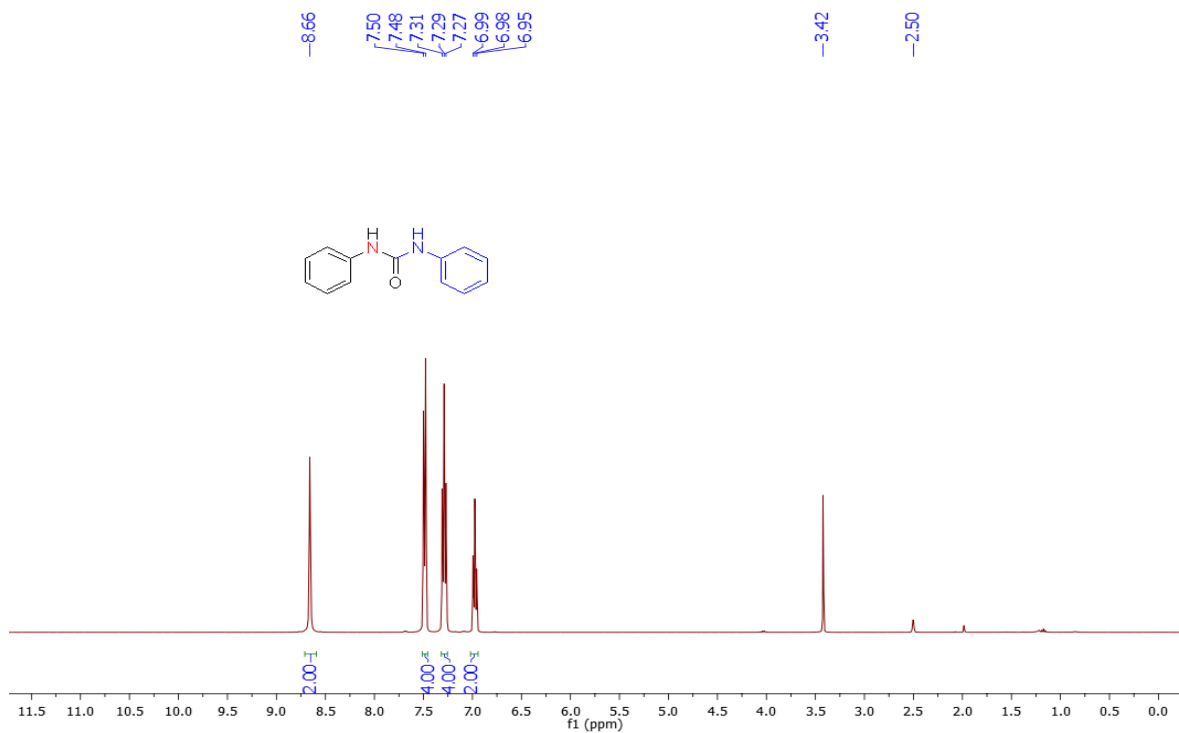

### <sup>13</sup>C-NMR of 1,3-diphenylurea (3a)

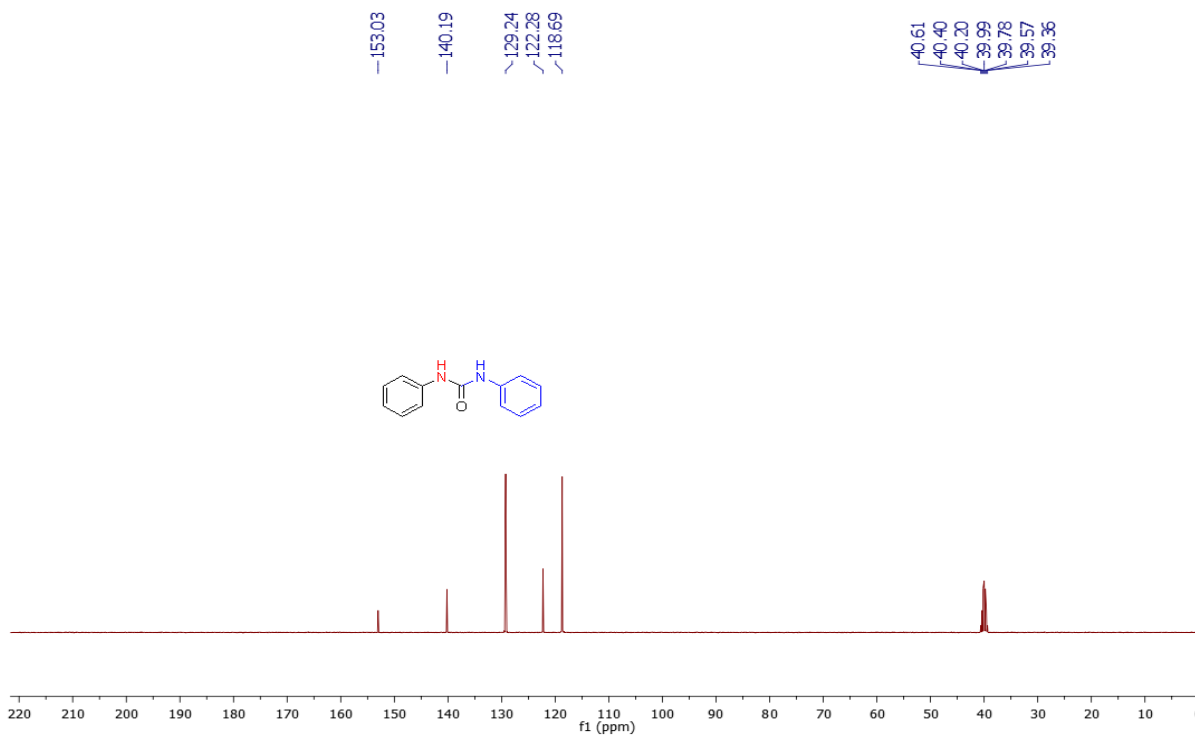

## DEPT of 1,3-diphenylurea (3a)

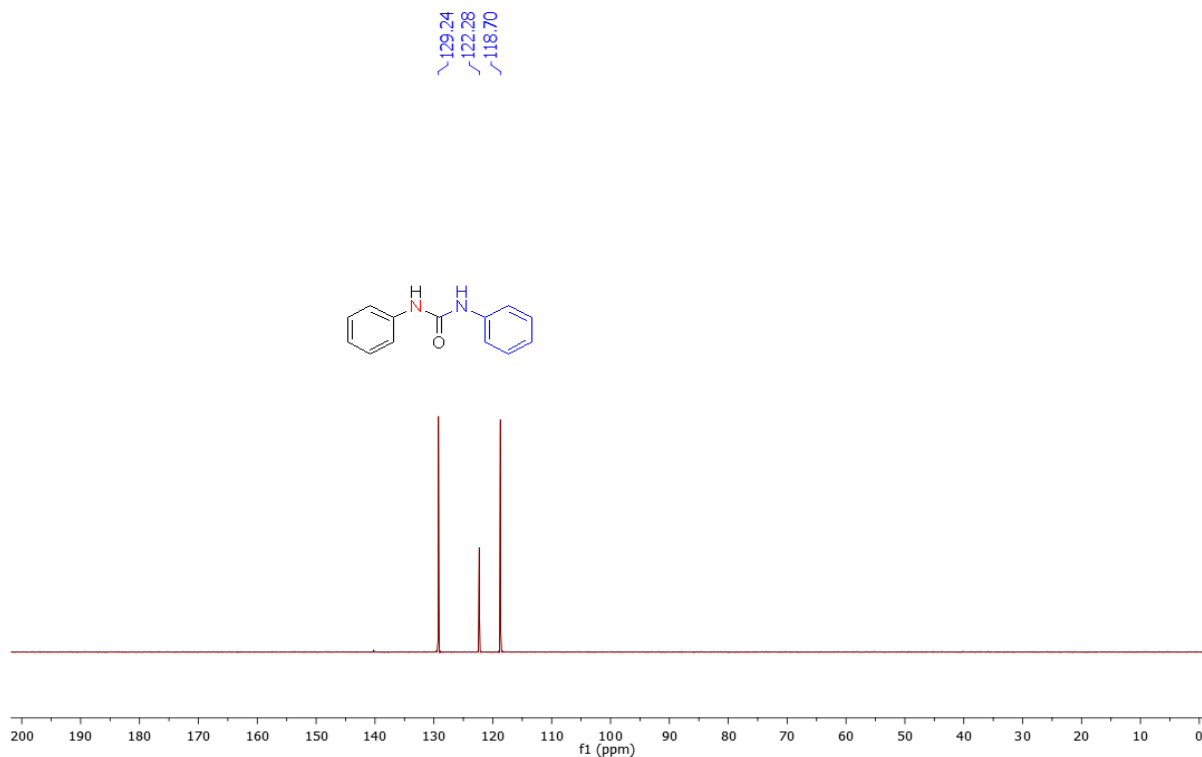

## HRMS (ESI-TOF) of compound (3a)

### Elemental Composition Report

Page 1

### Single Mass Analysis

Tolerance = 3.0 PPM / DBE: min = -1.5, max = 50.0

Element prediction: Off

Number of isotope peaks used for i-FIT = 3

Monoisotopic Mass, Even Electron Ions

14 formula(e) evaluated with 1 results within limits (up to 3 closest results for each mass)

Elements Used:

C: 0-15 H: 0-200 N: 0-2 O: 0-1

F-206

200921\_09 32 (0.637) Cm (32)

QMI DIVISION, CSIR-IIIM JAMMU  
Xevo G2-XS QTOF YFC2015

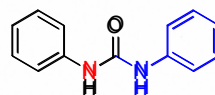

20-Sep-2021  
12:19:42  
1: TOF MS ES+  
1.24e+006

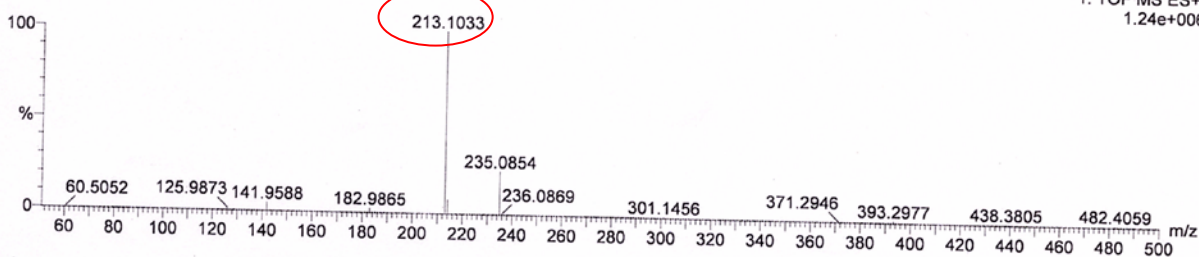

Minimum:

Maximum: 2.0 3.0 -1.5

| Mass     | Calc. Mass | mDa | PPM | DBE | i-FIT | Norm | Conf(%) | Formula      |
|----------|------------|-----|-----|-----|-------|------|---------|--------------|
| 213.1033 | 213.1028   | 0.5 | 2.3 | 8.5 | 43.6  | n/a  | n/a     | C13 H13 N2 O |

### <sup>1</sup>H-NMR of 1-(4-methoxyphenyl)-3-phenylurea (3b)

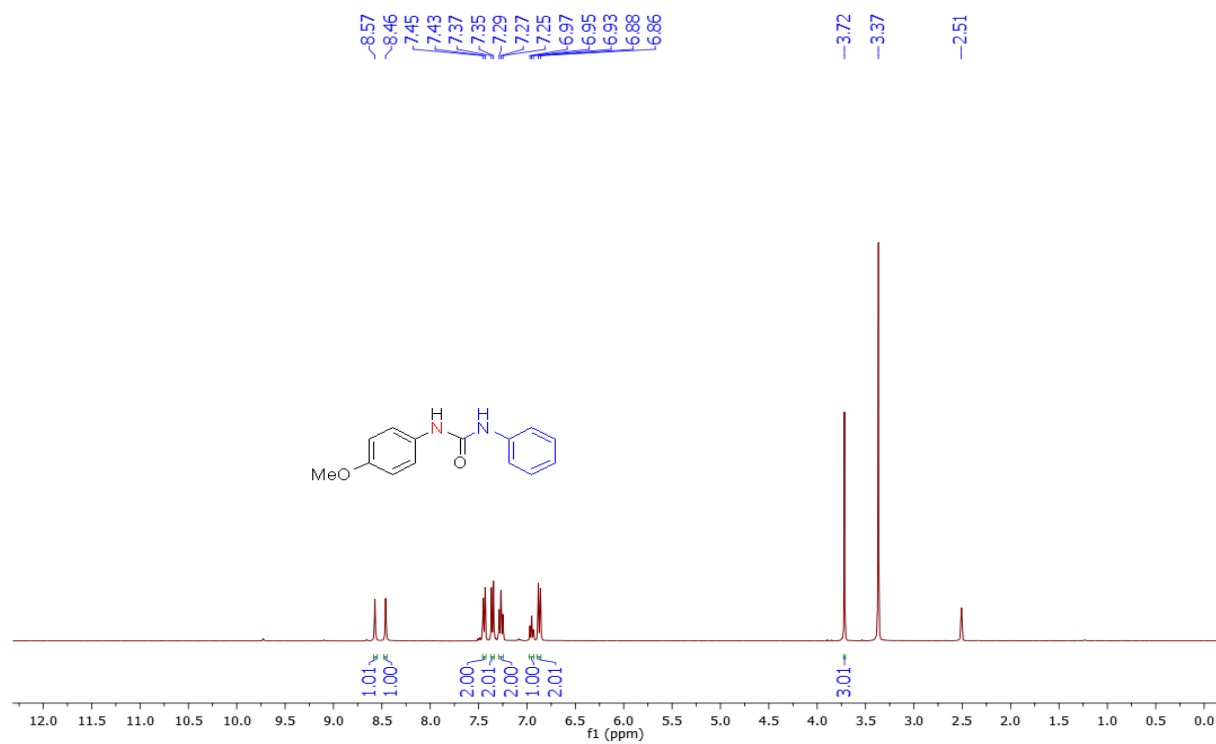

### <sup>13</sup>C-NMR of 1-(4-methoxyphenyl)-3-phenylurea (3b)

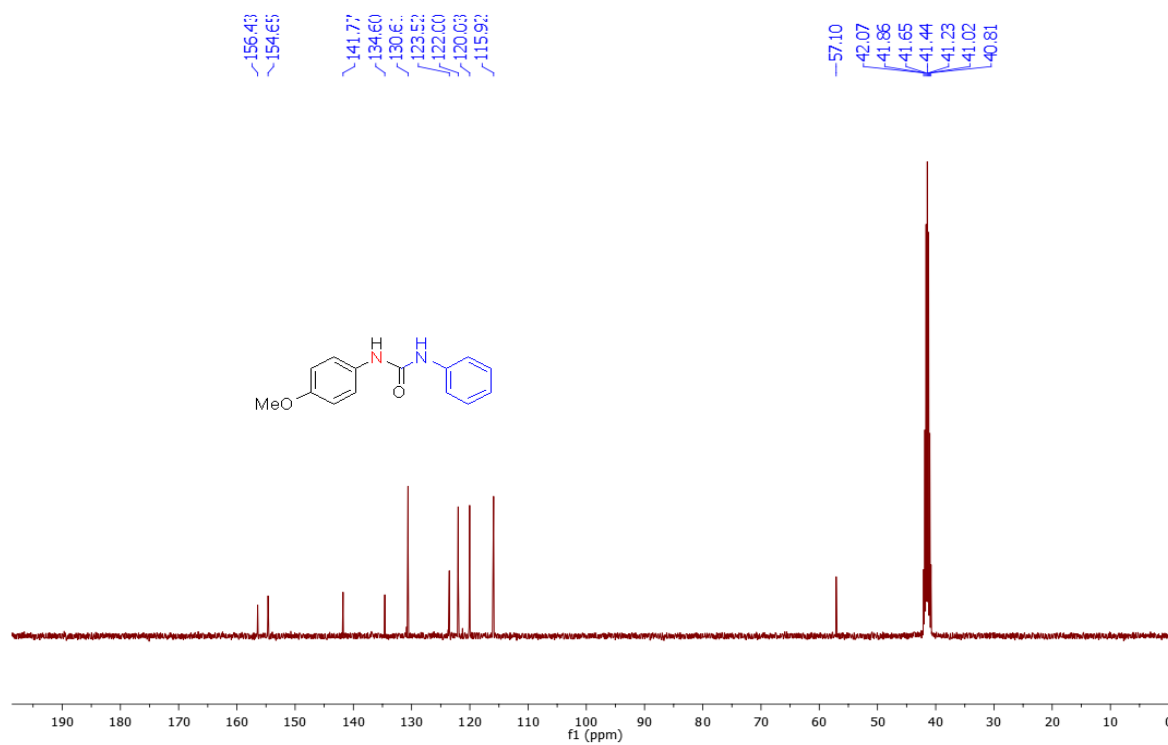

## DEPT of 1-(4-methoxyphenyl)-3-phenylurea (3b)

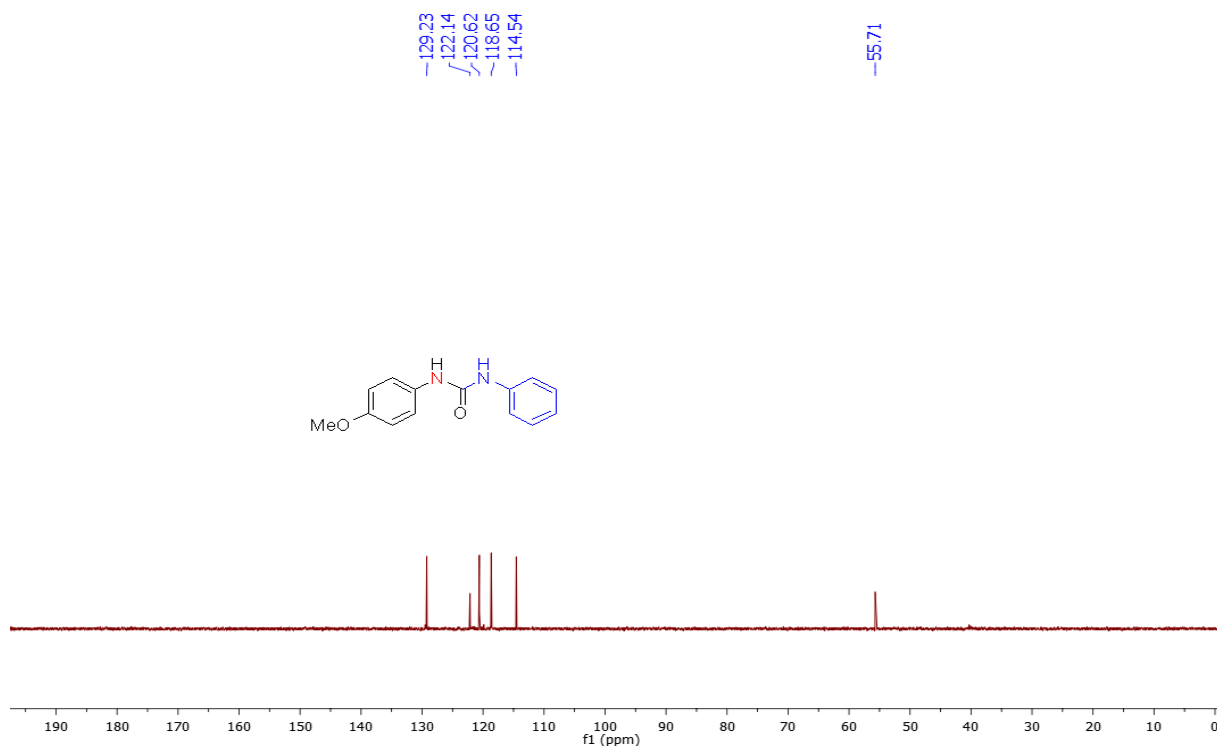

## HRMS (ESI-TOF) of compound (3b)

### Elemental Composition Report

Page 1

#### Single Mass Analysis

Tolerance = 3.0 PPM / DBE: min = -1.5, max = 50.0

Element prediction: Off

Number of isotope peaks used for i-FIT = 3

Monoisotopic Mass, Even Electron Ions

10 formula(e) evaluated with 1 results within limits (up to 3 closest results for each mass)

Elements Used:

C: 0-14 H: 0-200 N: 0-2 O: 0-2

F-141

200921\_03 22 (0.448) Cm (22:23)

QMI DIVISION, CSIR-IIIM JAMMU  
Xevo G2-XS QTOF YFC2015

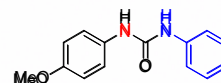

20-Sep-2021  
12:03:37  
1: TOF MS ES+  
1.19e+006

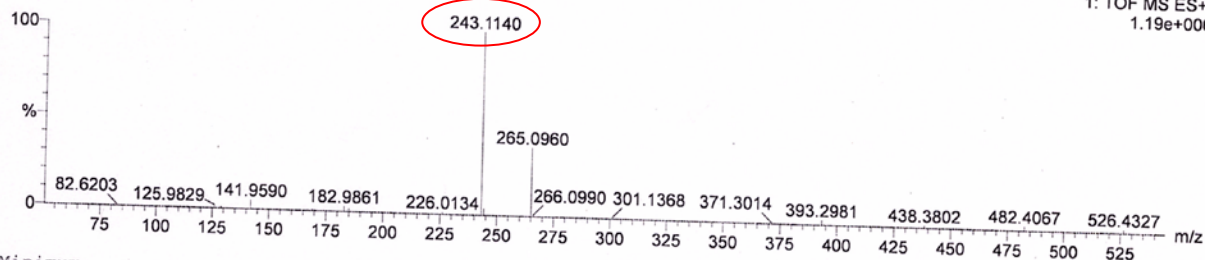

Minimum: -1.5  
Maximum: 2.0 3.0 50.0

| Mass     | Calc. Mass | mDa | PPM | DBE | i-FIT | Norm | Conf (%) | Formula       |
|----------|------------|-----|-----|-----|-------|------|----------|---------------|
| 243.1140 | 243.1134   | 0.6 | 2.5 | 8.5 | 44.9  | n/a  | n/a      | C14 H15 N2 O2 |

### <sup>1</sup>H-NMR of 1-(4-cyanophenyl)-3-phenylurea (3c)

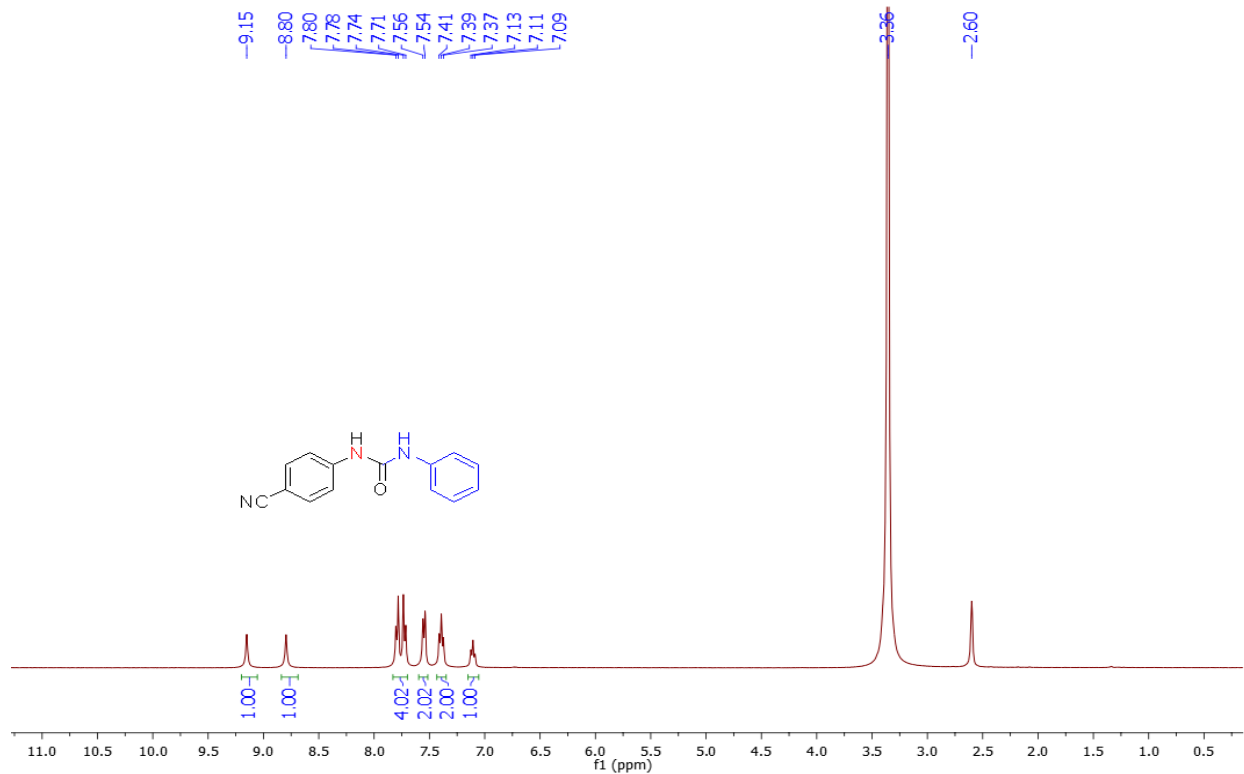

### <sup>13</sup>C-NMR of 1-(4-cyanophenyl)-3-phenylurea (3c)

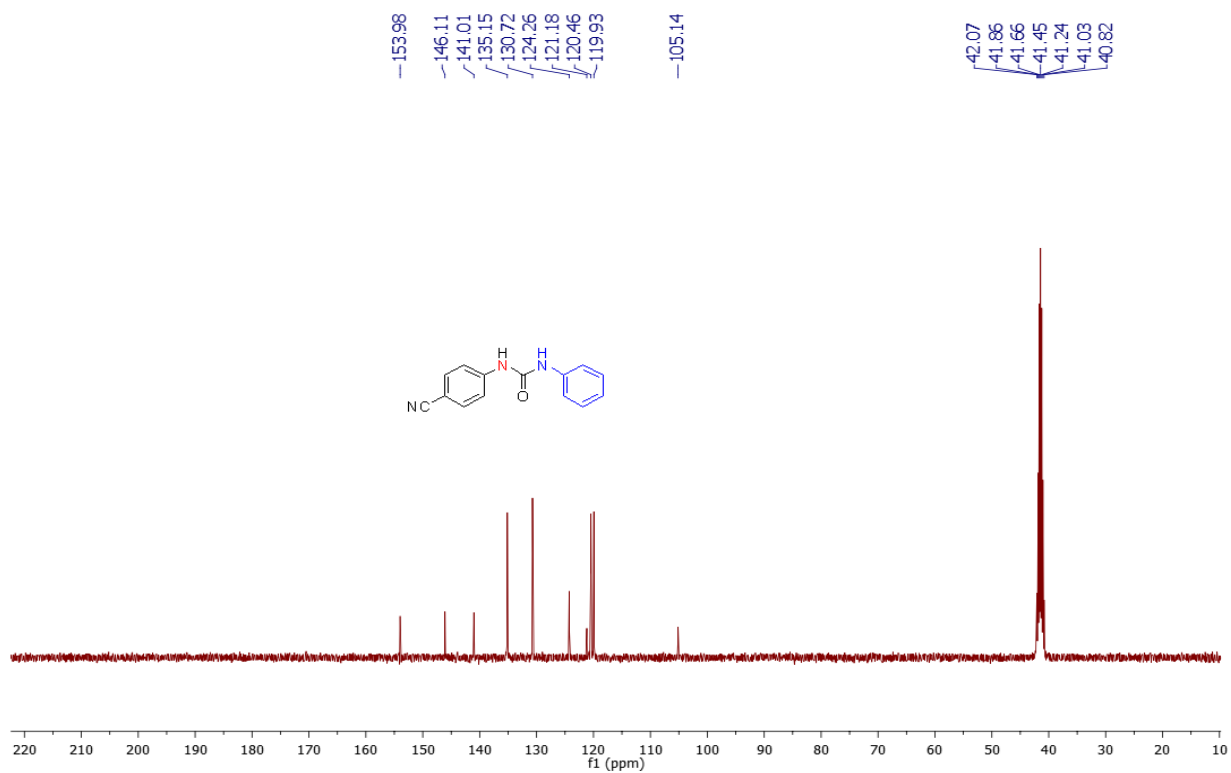

# DEPT of 1-(4-cyanophenyl)-3-phenylurea (3c)

133.87  
129.44  
122.88  
119.16  
118.55

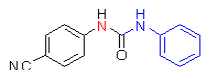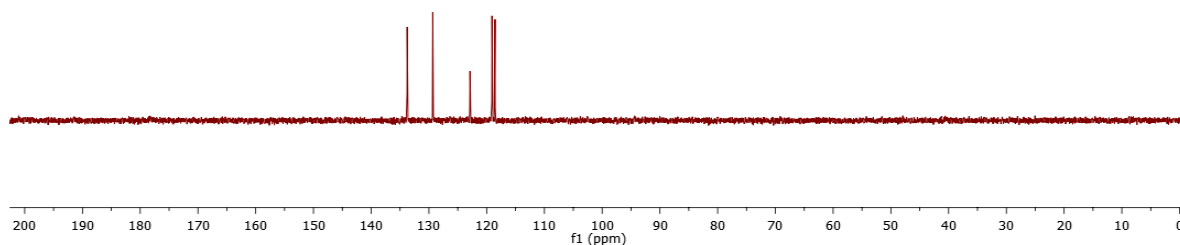

## HRMS (ESI-TOF) of compound (3c)

### Elemental Composition Report

Page 1

#### Single Mass Analysis

Tolerance = 3.0 PPM / DBE: min = -1.5, max = 50.0

Element prediction: Off

Number of isotope peaks used for i-FIT = 3

Monoisotopic Mass, Even Electron Ions

28 formula(e) evaluated with 1 results within limits (up to 3 closest results for each mass)

Elements Used:

C: 0-14 H: 0-200 N: 0-3 O: 0-1 Na: 0-1

Z: 8

200921\_06 9 (0.208) Cm (9)

QMI DIVISION, CSIR-IIIM JAMMU  
Xevo G2-XS QTOF YFC2015

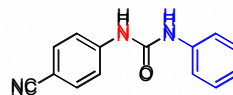

20-Sep-2021  
12:11:52  
1: TOF MS ES+  
9.99e+005

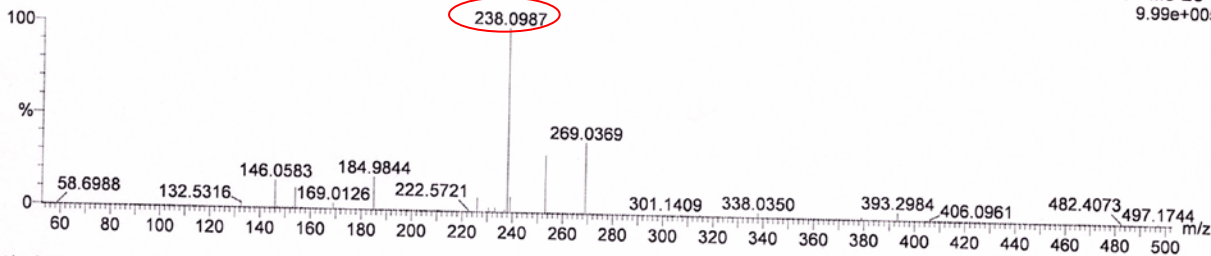

Minimum:

Maximum: 2.0 3.0 -1.5

| Mass     | Calc. Mass | mDa | PPM | DBE  | i-FIT | Norm | Conf (%) | Formula      |
|----------|------------|-----|-----|------|-------|------|----------|--------------|
| 238.0987 | 238.0980   | 0.7 | 2.9 | 10.5 | 43.5  | n/a  | n/a      | C14 H12 N3 O |



### <sup>1</sup>H-NMR of 1-(4-chlorophenyl)-3-phenylurea (3d)

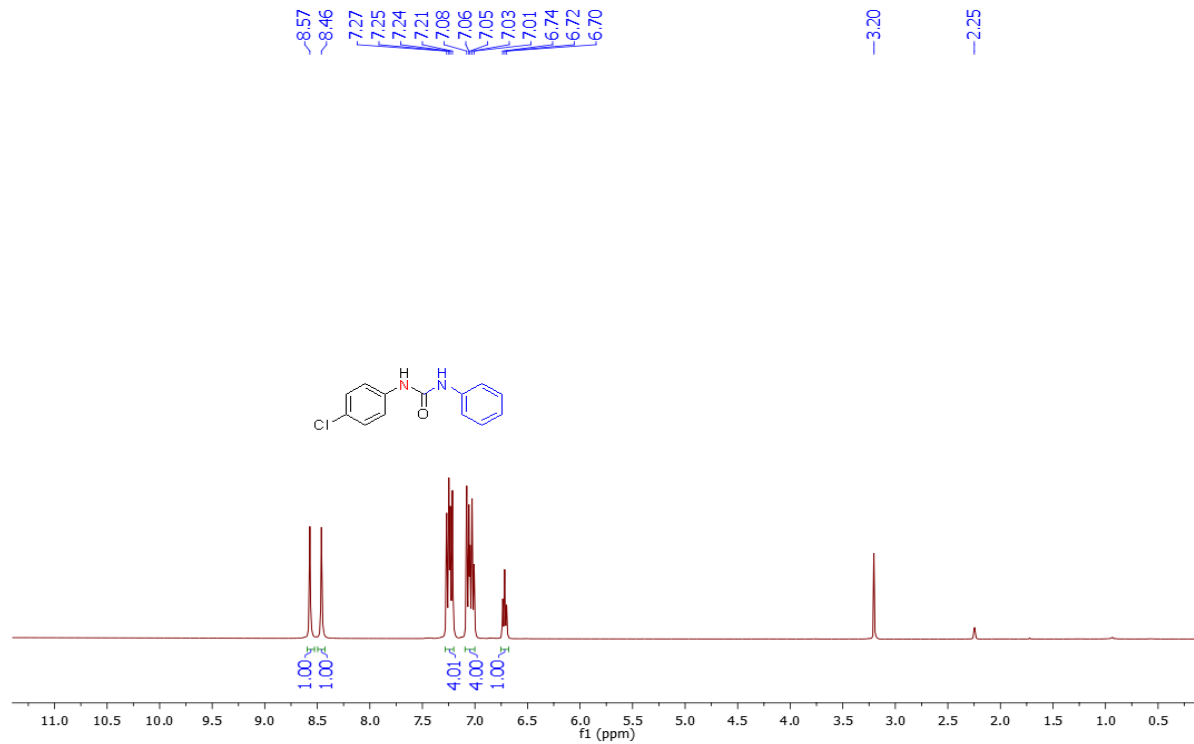

### <sup>13</sup>C-NMR of 1-(4-chlorophenyl)-3-phenylurea (3d)

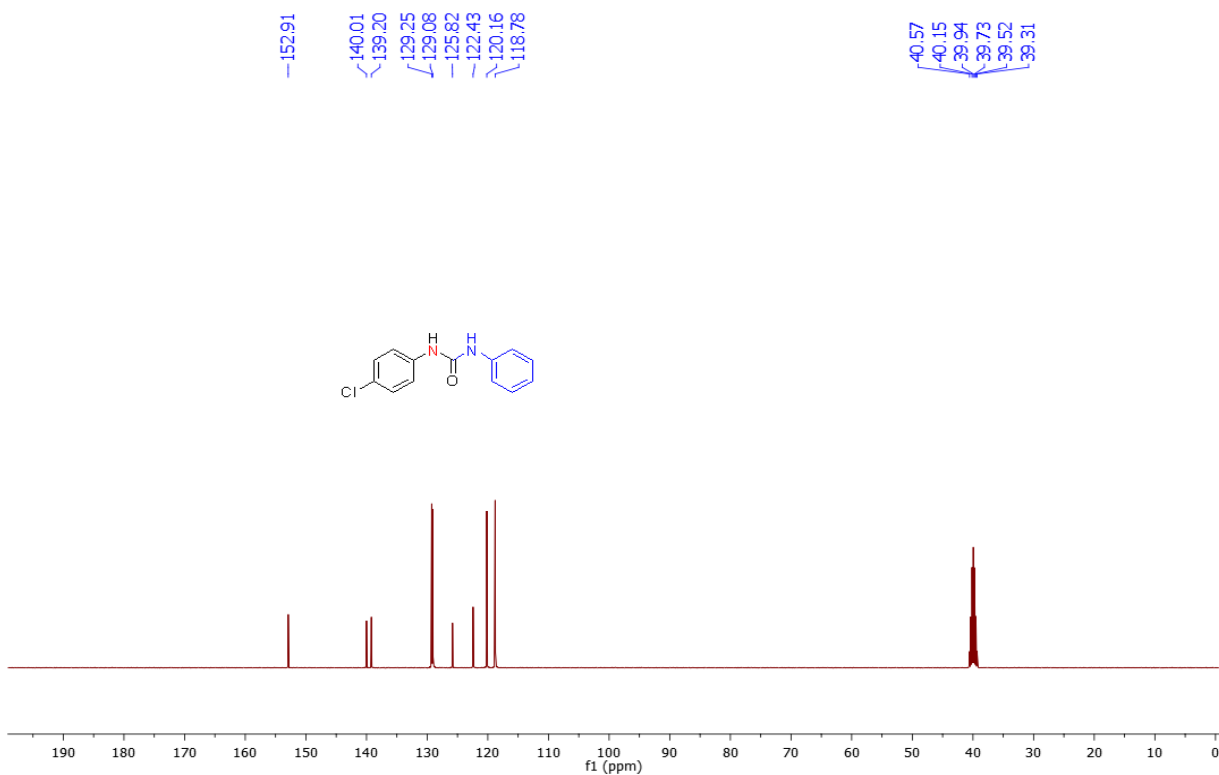

## DEPT of 1-(4-chlorophenyl)-3-phenylurea (3d)

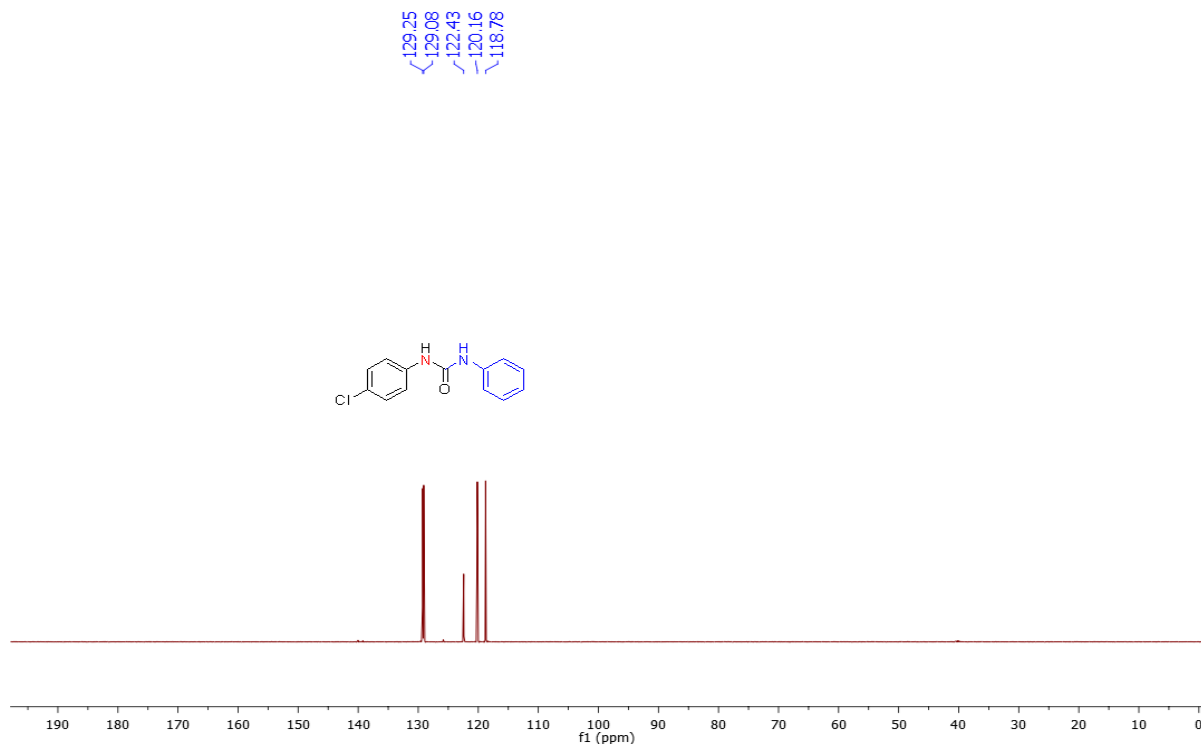

## HRMS (ESI-TOF) of compound (3d)

### Elemental Composition Report

Page 1

#### Single Mass Analysis

Tolerance = 5.0 PPM / DBE: min = -1.5, max = 50.0

Element prediction: Off

Number of isotope peaks used for i-FIT = 3

Monoisotopic Mass, Even Electron Ions

13 formula(e) evaluated with 1 results within limits (up to 3 closest results for each mass)

Elements Used:

C: 0-13 H: 0-200 N: 0-2 O: 0-1 Cl: 0-1

F-208

210921\_23 9 (0.208) Cm (8:10)

QMI DIVISION, CSIR-IIIM JAMMU  
Xevo G2-XS QTOF YFC2015

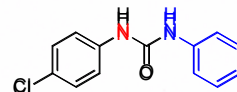

21-Sep-2021  
13:05:19  
1: TOF MS ES+  
1.35e+006

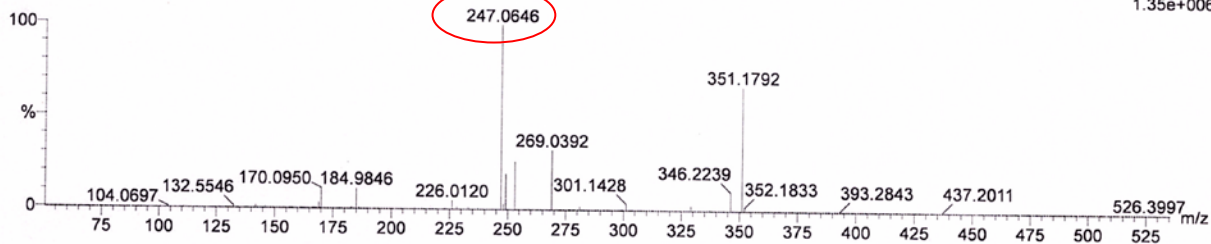

Minimum: -1.5  
Maximum: 2.0 5.0 50.0

| Mass     | Calc. Mass | mDa | PPM | DBE | i-FIT | Norm | Conf(%) | Formula         |
|----------|------------|-----|-----|-----|-------|------|---------|-----------------|
| 247.0646 | 247.0638   | 0.8 | 3.2 | 8.5 | 33.8  | n/a  | n/a     | C13 H12 N2 O Cl |

### <sup>1</sup>H-NMR of 1-(4-methoxyphenyl)-3-(4-(trifluoromethoxy)phenyl)urea (3e)

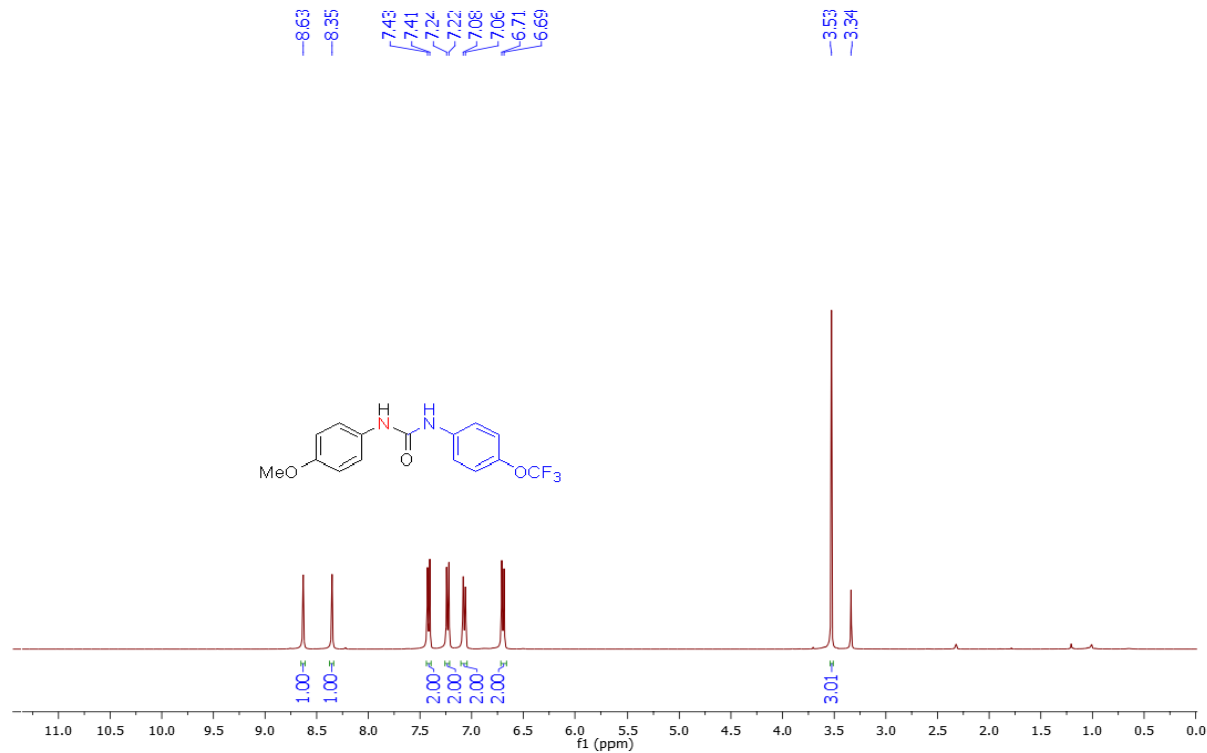

### <sup>19</sup>F-NMR of 1-(4-methoxyphenyl)-3-(4-(trifluoromethoxy)phenyl)urea (3e)

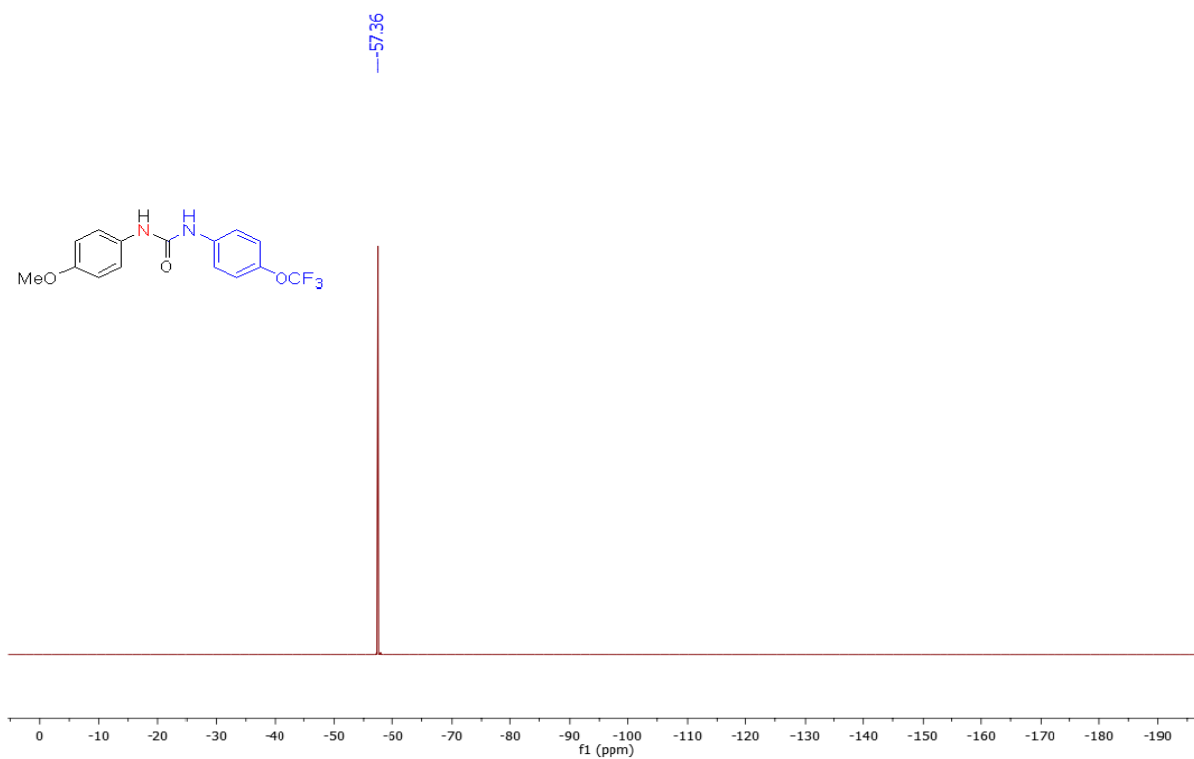

### <sup>13</sup>C-NMR of 1-(4-methoxyphenyl)-3-(4-(trifluoromethoxy)phenyl)urea (3e)

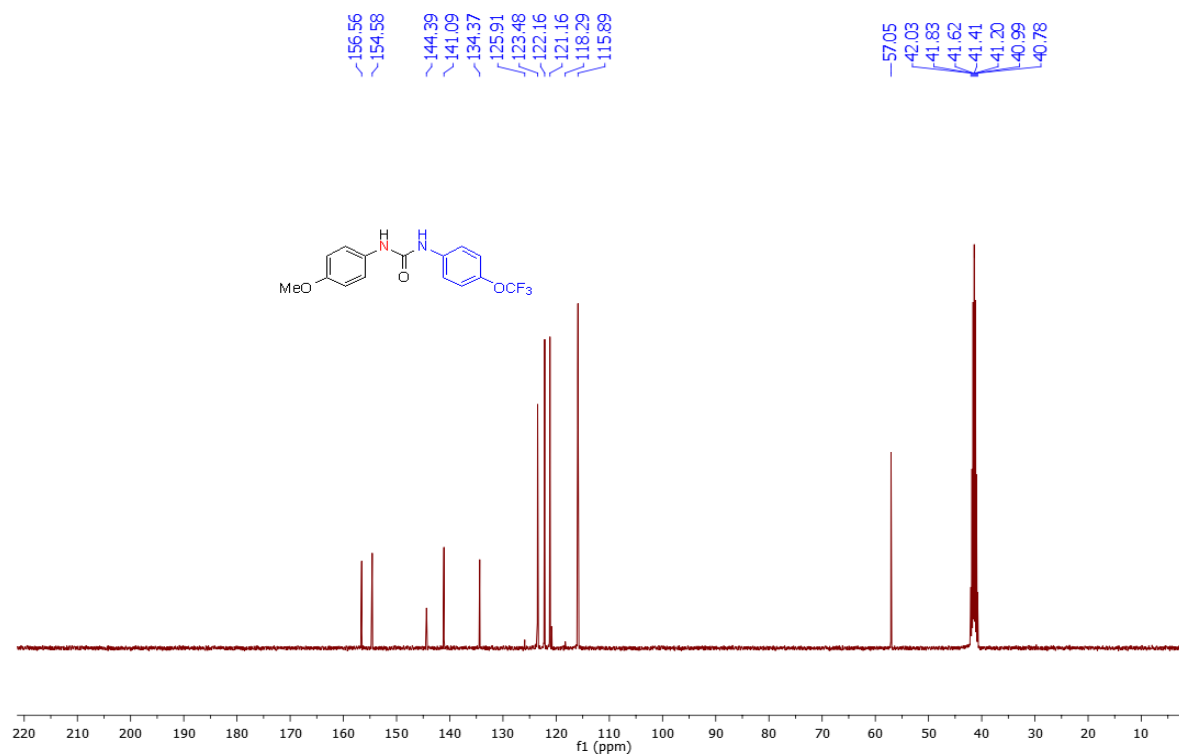

### DEPT of 1-(4-methoxyphenyl)-3-(4-(trifluoromethoxy)phenyl)urea (3e)

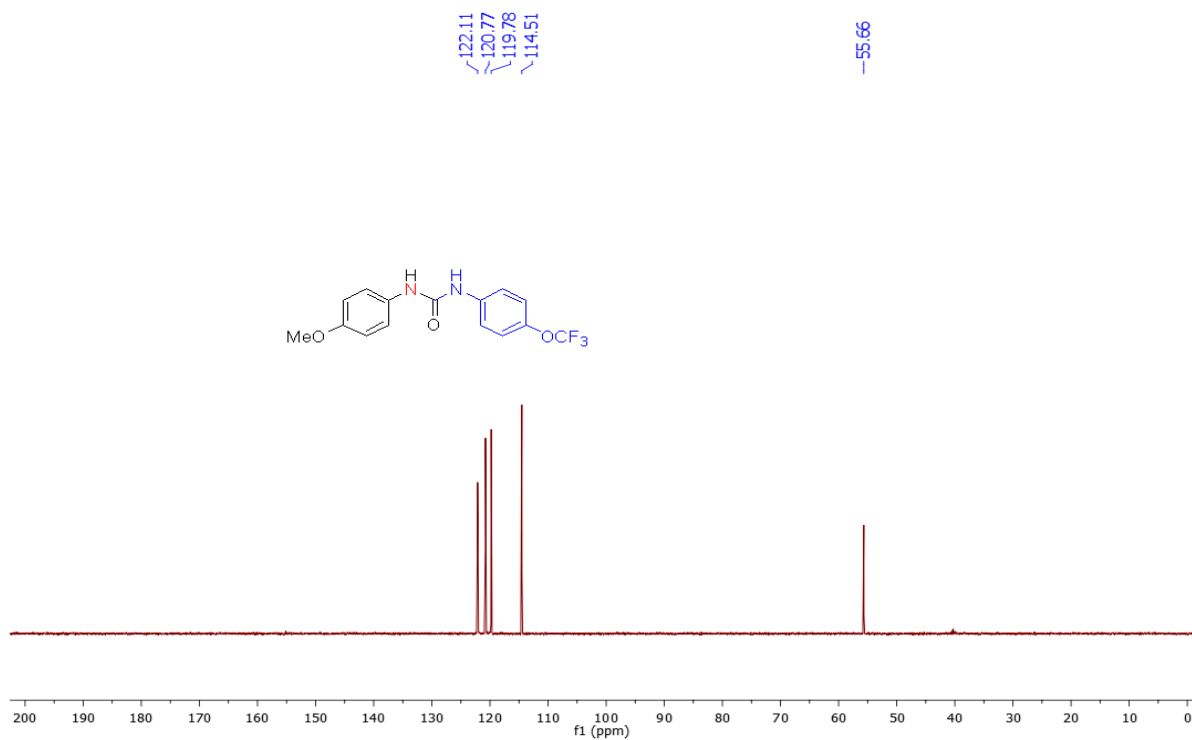

# HRMS (ESI-TOF) of compound (3e)

## Elemental Composition Report

Page 1

### Single Mass Analysis

Tolerance = 5.0 PPM / DBE: min = -1.5, max = 50.0

Element prediction: Off

Number of isotope peaks used for i-FIT = 3

Monoisotopic Mass, Even Electron Ions

49 formula(e) evaluated with 1 results within limits (up to 3 closest results for each mass)

Elements Used:

C: 0-15 H: 0-200 N: 0-2 O: 0-3 F: 0-3

F-412

210921\_16 29 (0.586) Cm (28:29)

QMI DIVISION, CSIR-IIIM JAMMU  
Xevo G2-XS QTOF YFC2015

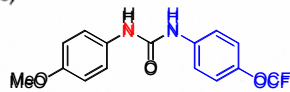

21-Sep-2021  
12:47:19  
1: TOF MS ES+  
9.56e+005

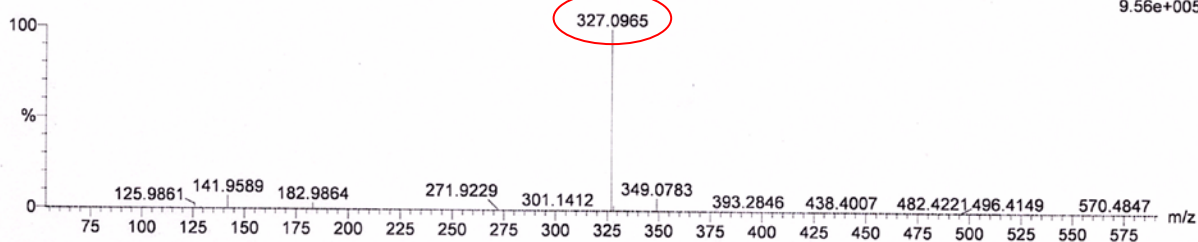

Minimum: -1.5  
Maximum: 2.0 5.0 50.0

| Mass     | Calc. Mass | mDa | PPM | DBE | i-FIT | Norm | Conf(%) | Formula          |
|----------|------------|-----|-----|-----|-------|------|---------|------------------|
| 327.0965 | 327.0957   | 0.8 | 2.4 | 8.5 | 38.9  | n/a  | n/a     | C15 H14 N2 O3 F3 |

# <sup>1</sup>H-NMR of-3-(4-(1-(4-cyanophenyl trifluoromethoxy)phenyl)urea (3f)

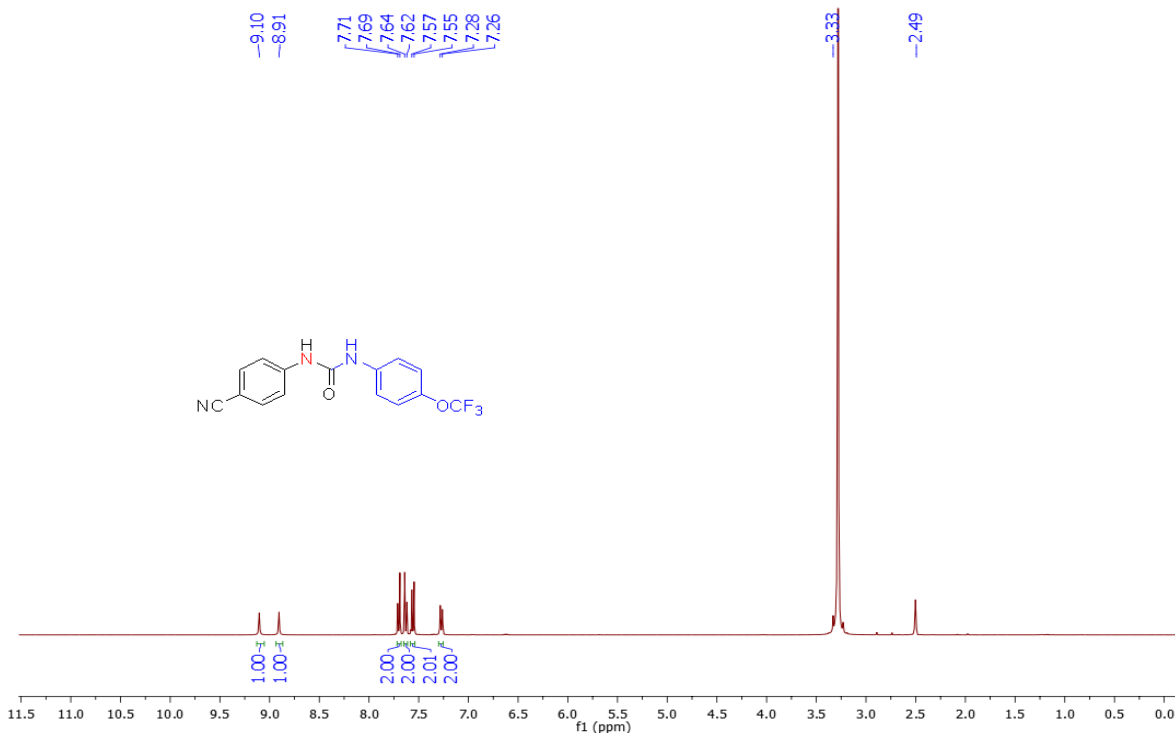

### <sup>19</sup>F-NMR of-3-(4-(1-(4-cyanophenyl trifluoromethoxy)phenyl)urea (3f)

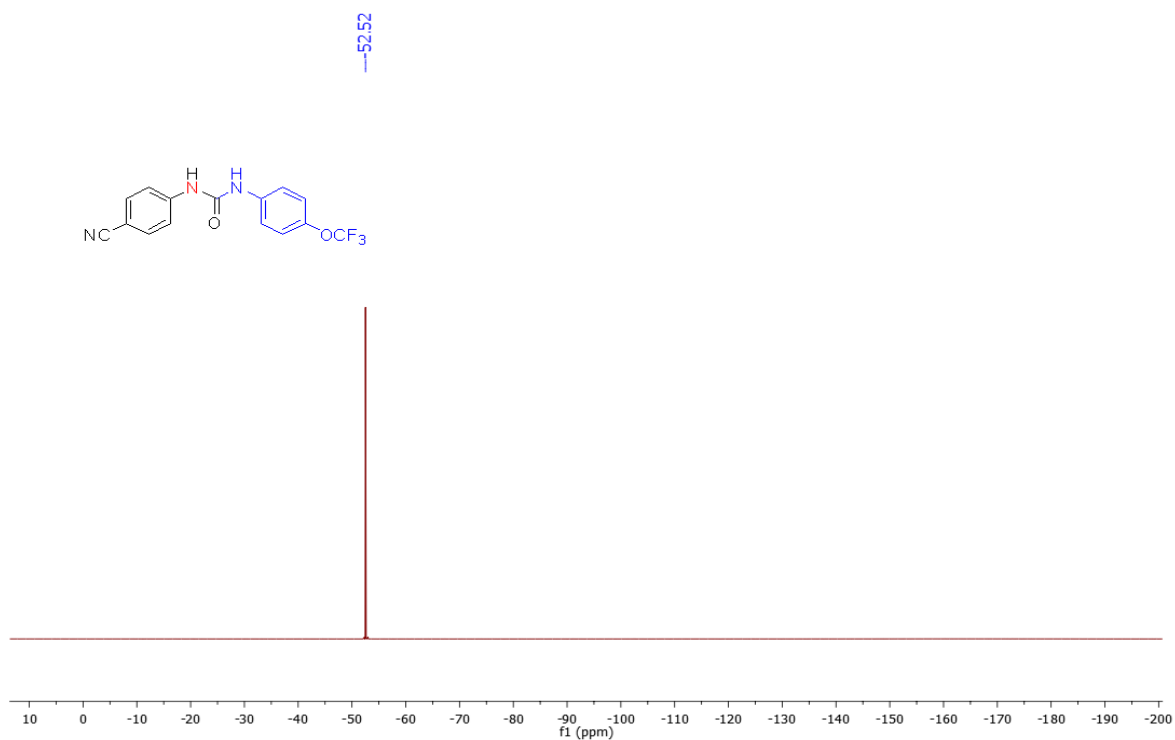

### <sup>13</sup>C-NMR of-3-(4-(1-(4-cyanophenyl trifluoromethoxy)phenyl)urea (3f)

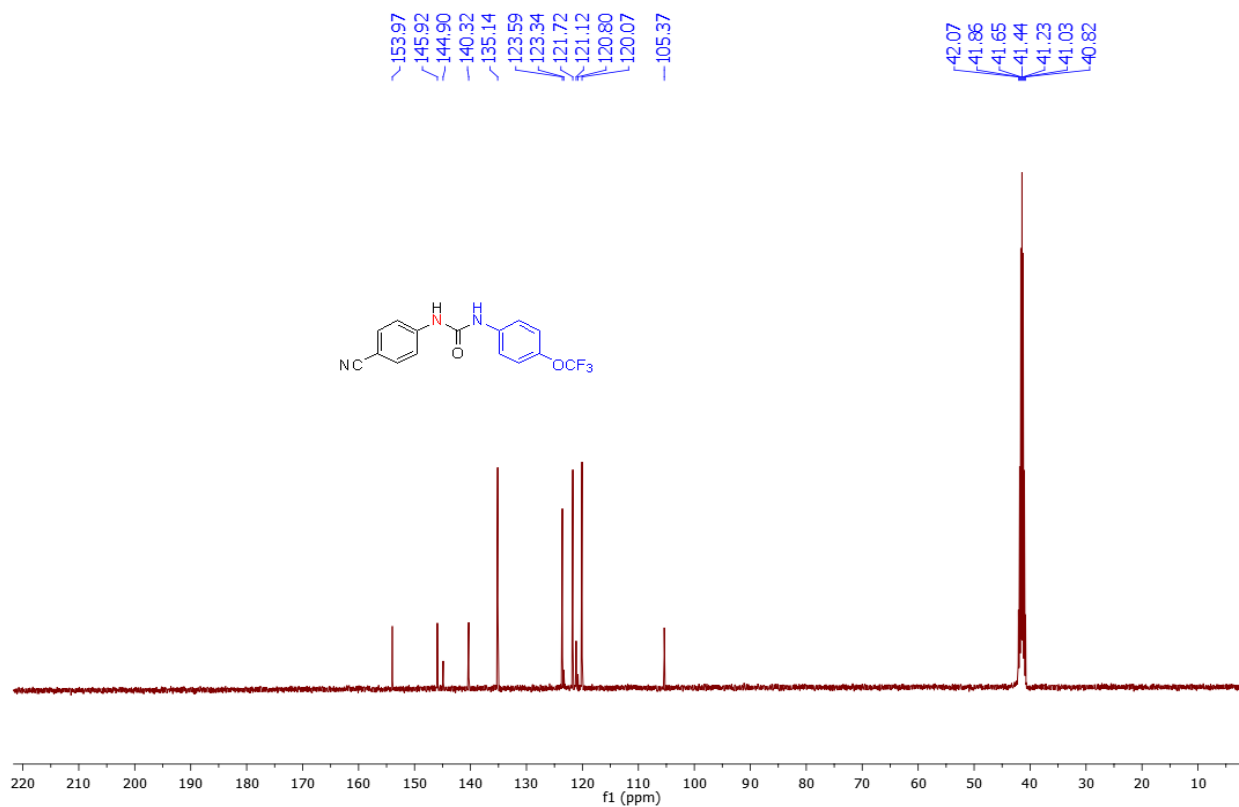

# DEPT of-3-(4-(1-(4-cyanophenyl trifluoromethoxy)phenyl)urea (3f)

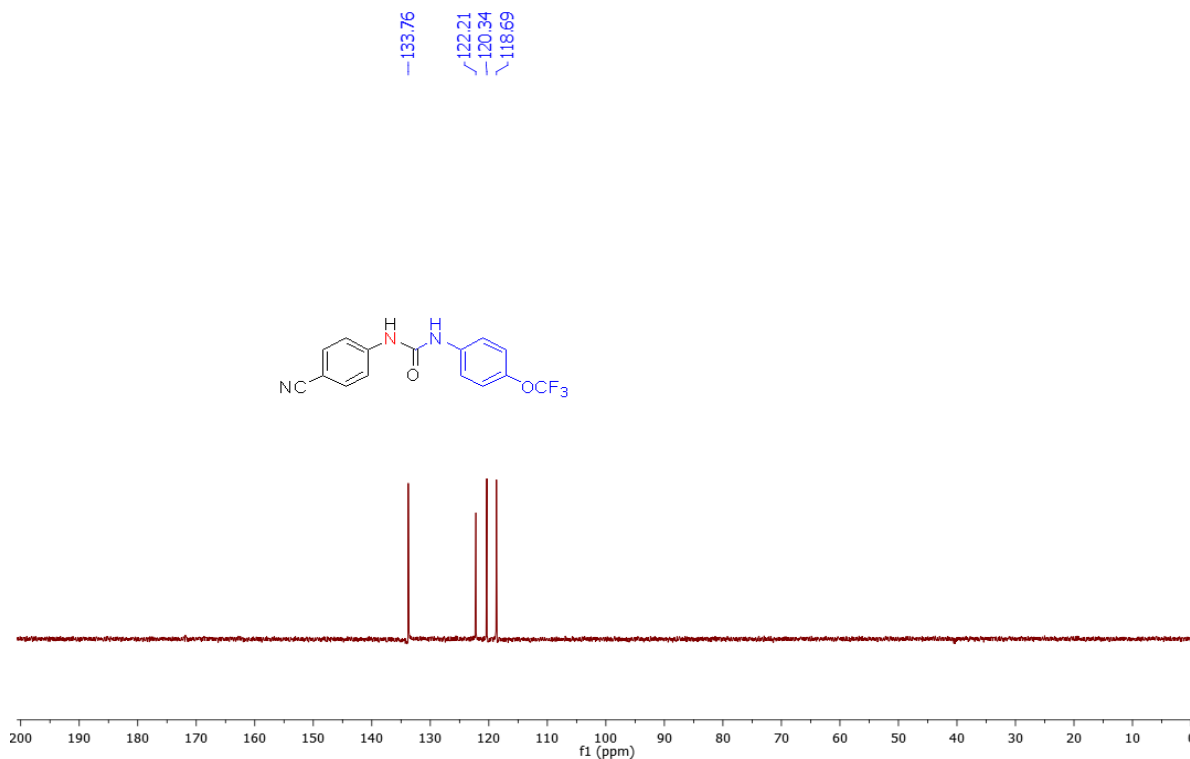

## HRMS (ESI-TOF) of compound (3f)

### Elemental Composition Report

Page 1

#### Single Mass Analysis

Tolerance = 5.0 PPM / DBE: min = -1.5, max = 50.0  
 Element prediction: Off  
 Number of isotope peaks used for i-FIT = 3

#### Monoisotopic Mass, Even Electron Ions

52 formula(e) evaluated with 1 results within limits (up to 3 closest results for each mass)

Elements Used:

C: 0-15 H: 0-200 N: 0-3 O: 0-2 F: 0-3

F-160

210921\_11 12 (0.259) Cm (12)

QMI DIVISION, CSIR-IIIM JAMMU  
 Xevo G2-XS QTOF YFC2015

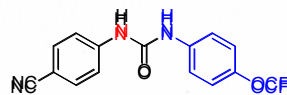

21-Sep-2021  
 12:34:28  
 1: TOF MS ES+  
 2.89e+005

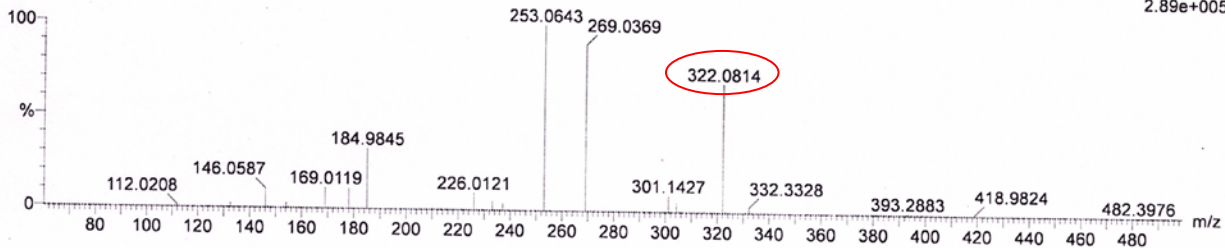

Minimum: -1.5  
 Maximum: 2.0 5.0 50.0

| Mass     | Calc. Mass | mDa | PPM | DBE  | i-FIT | Norm | Conf (%) | Formula          |
|----------|------------|-----|-----|------|-------|------|----------|------------------|
| 322.0814 | 322.0803   | 1.1 | 3.4 | 10.5 | 35.4  | n/a  | n/a      | C15 H11 N3 O2 F3 |

### <sup>1</sup>H-NMR of 1-(4-(tert-butyl)phenyl)-3-(4-methoxyphenyl)urea (3g)

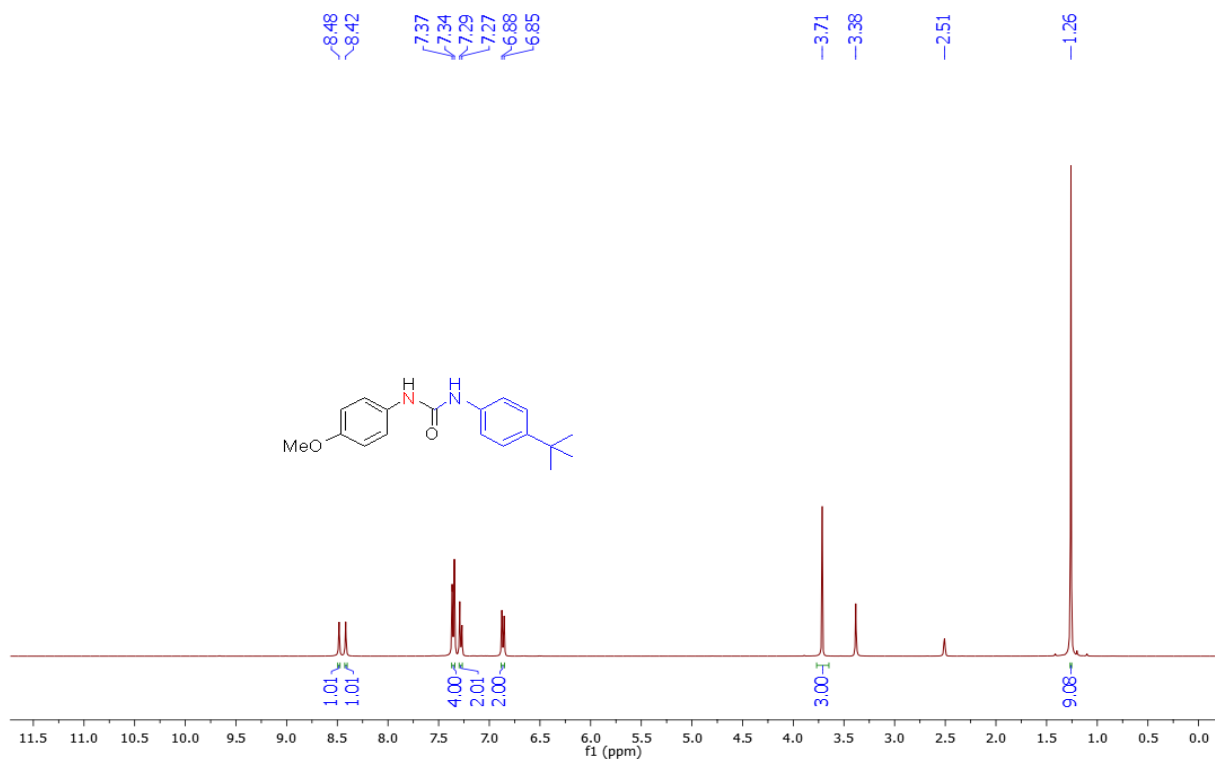

### <sup>13</sup>C-NMR of 1-(4-(tert-butyl)phenyl)-3-(4-methoxyphenyl)urea (3g)

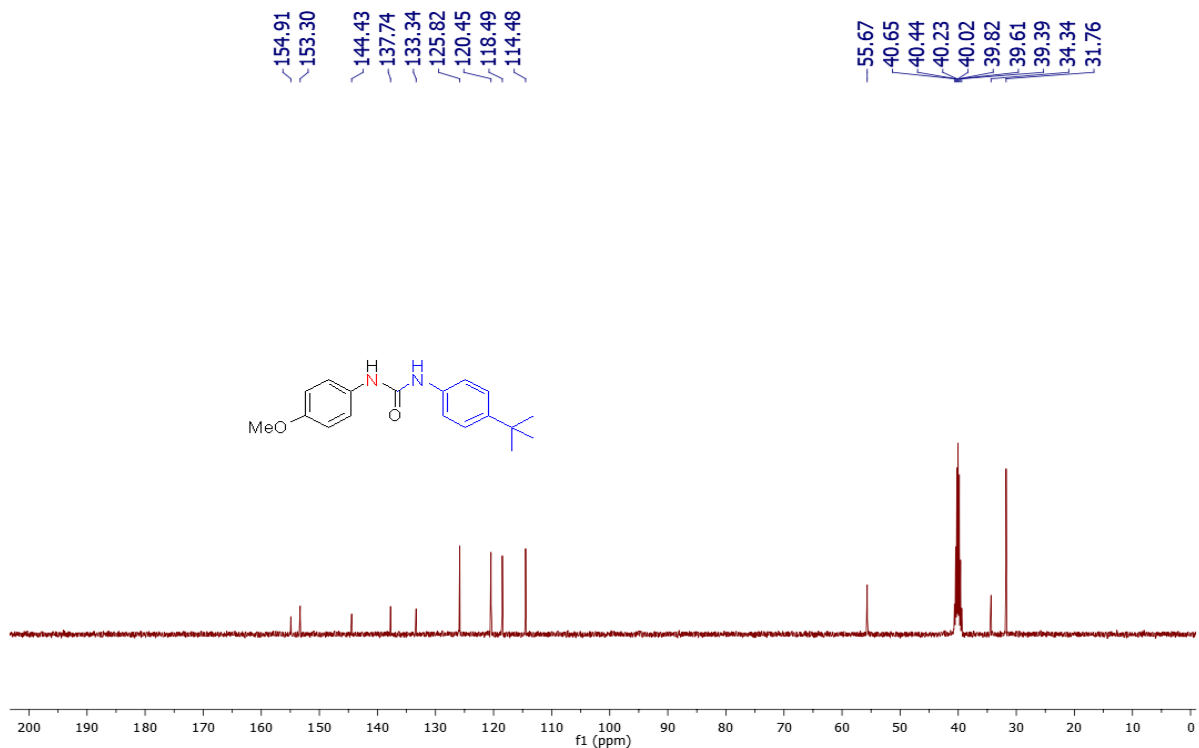



## DEPT of 1-(4-(tert-butyl)phenyl)-3-(4-methoxyphenyl)urea (3g)

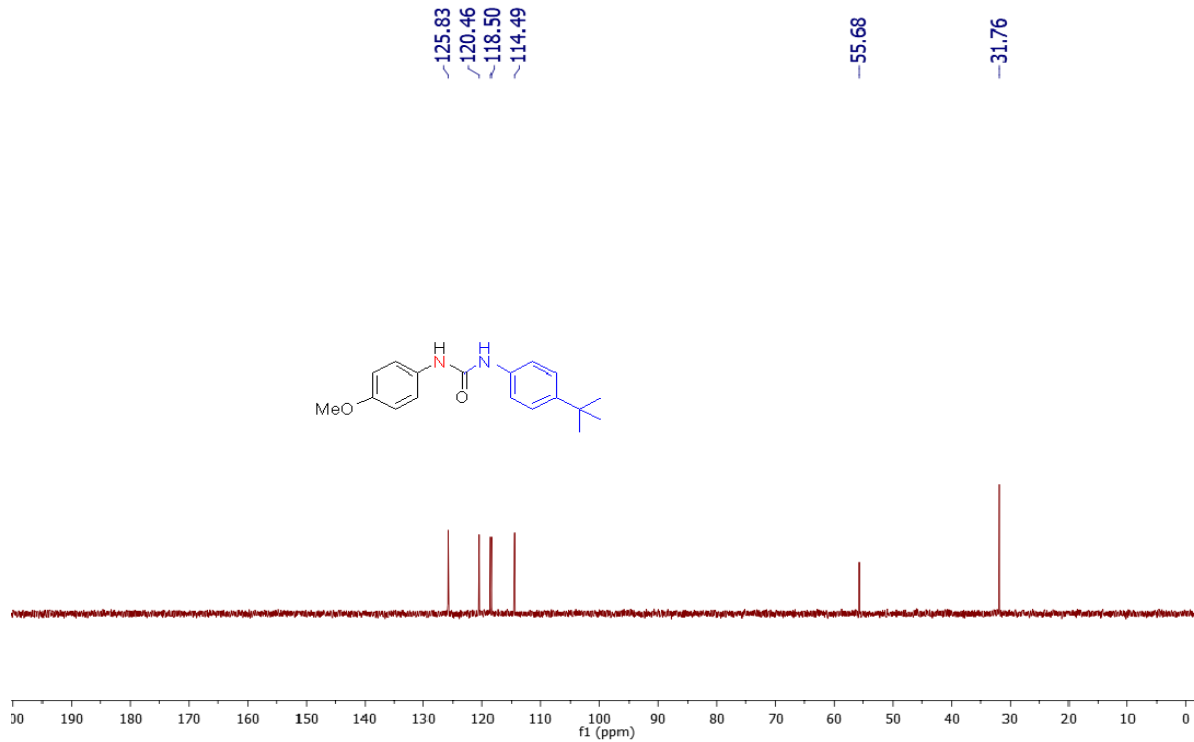

## HRMS of 1-(4-(tert-butyl)phenyl)-3-(4-methoxyphenyl)urea (3g)

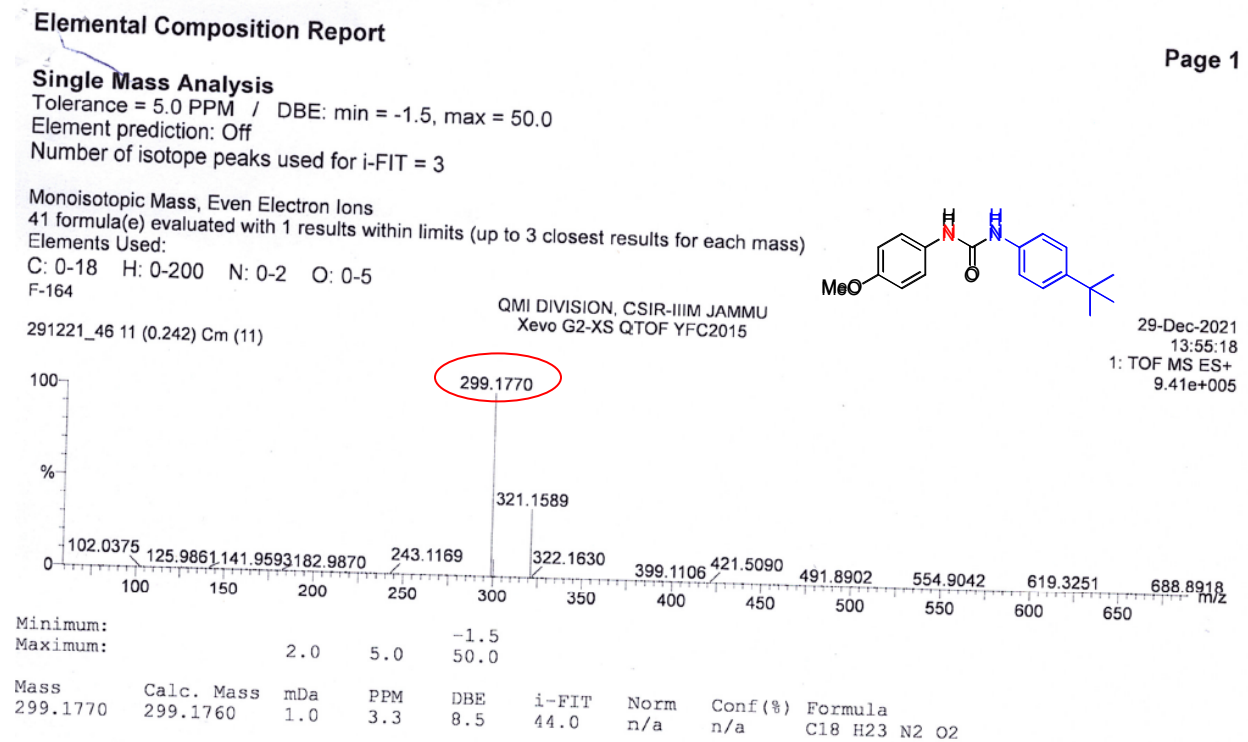

### <sup>1</sup>H-NMR of 1-(4-(tert-butyl)phenyl)-3-(4-cyanophenyl)urea (3h)

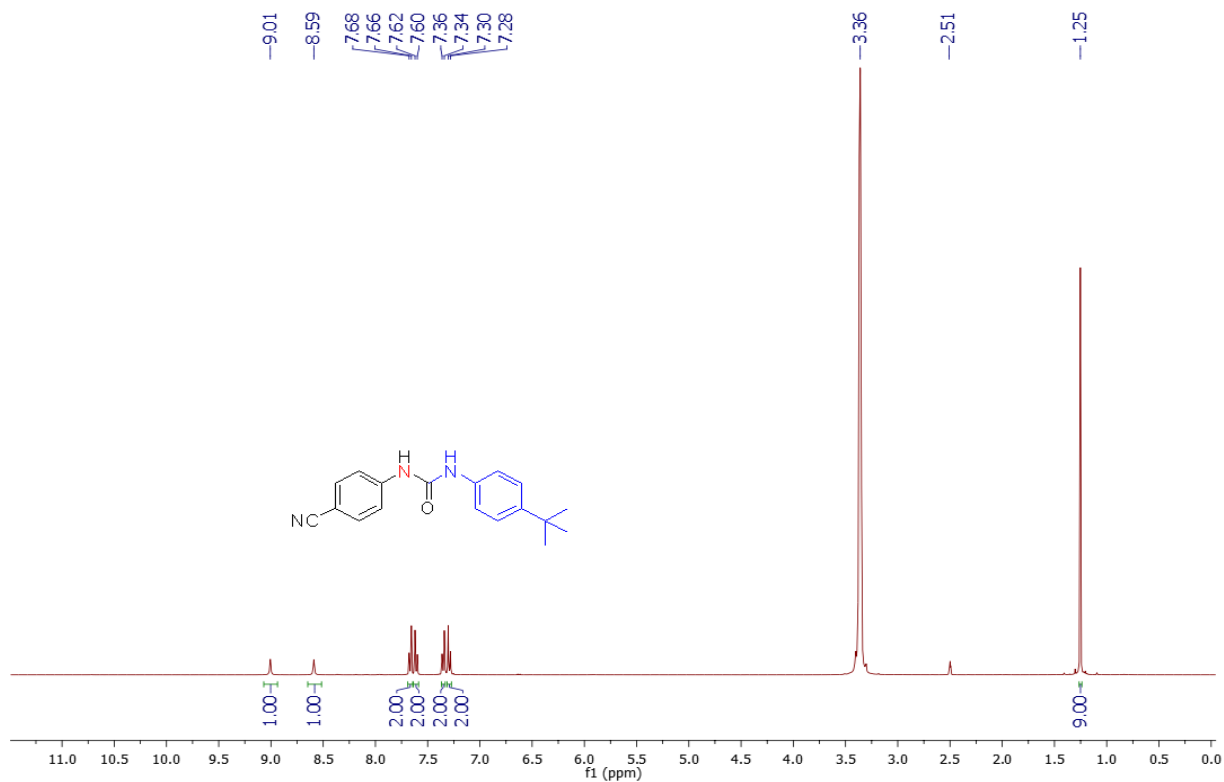

### <sup>13</sup>C-NMR of 1-(4-(tert-butyl)phenyl)-3-(4-cyanophenyl)urea (3h)

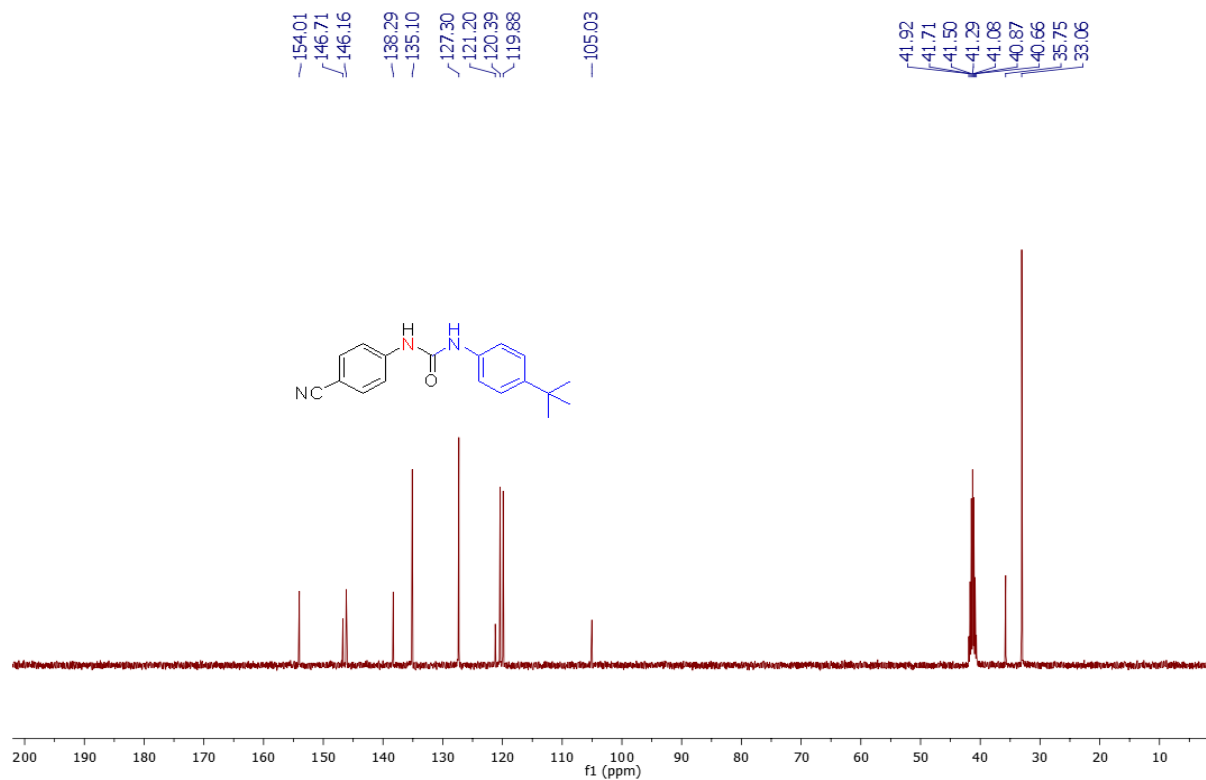

## DEPT of 1-(4-(tert-butyl)phenyl)-3-(4-cyanophenyl)urea (3h)

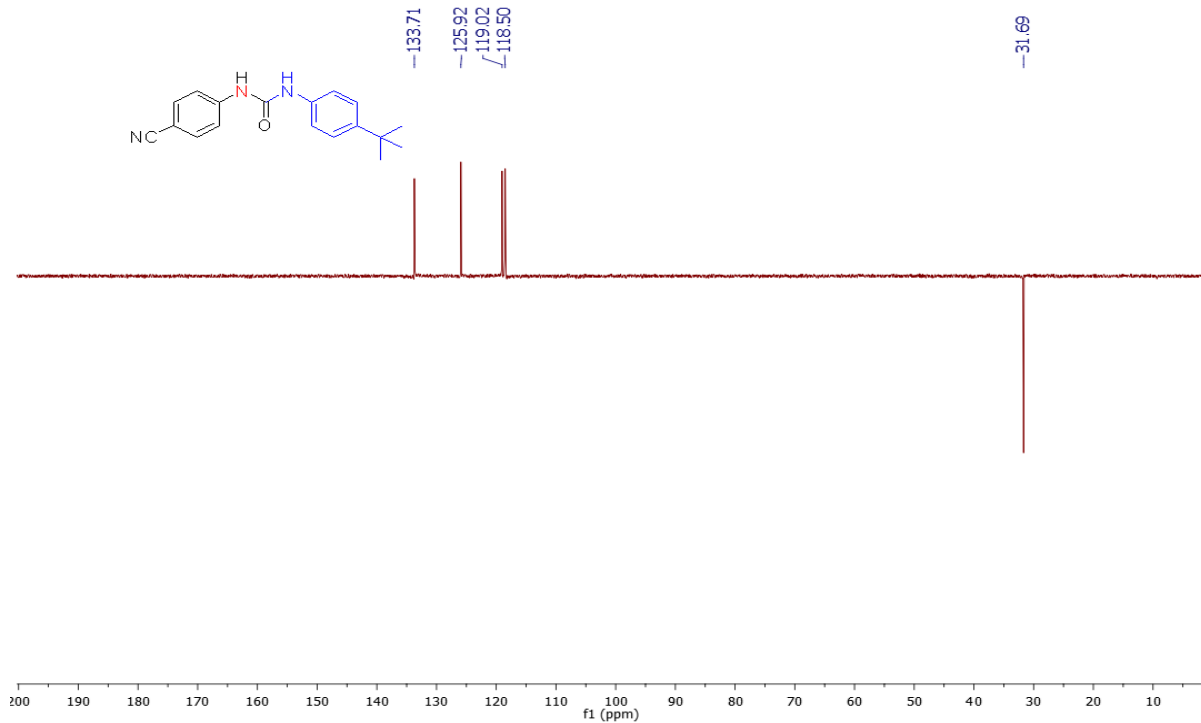

## HRMS of 1-(4-(tert-butyl)phenyl)-3-(4-cyanophenyl)urea (3h)

### Elemental Composition Report

Page 1

#### Single Mass Analysis

Tolerance = 5.0 PPM / DBE: min = -1.5, max = 50.0

Element prediction: Off

Number of isotope peaks used for i-FIT = 3

Monoisotopic Mass, Even Electron Ions

12 formula(e) evaluated with 1 results within limits (up to 3 closest results for each mass)

Elements Used:

C: 0-18 H: 0-200 N: 0-3 O: 0-1

F-162

QMI DIVISION, CSIR-IIIM JAMMU  
Xevo G2-XS QTOF YFC2015

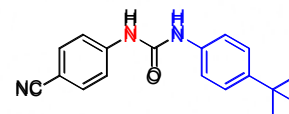

28-Dec-2021  
13:40:55  
1: TOF MS ES+  
6.19e+005

281221\_31 12 (0.259) Cm (12:14)

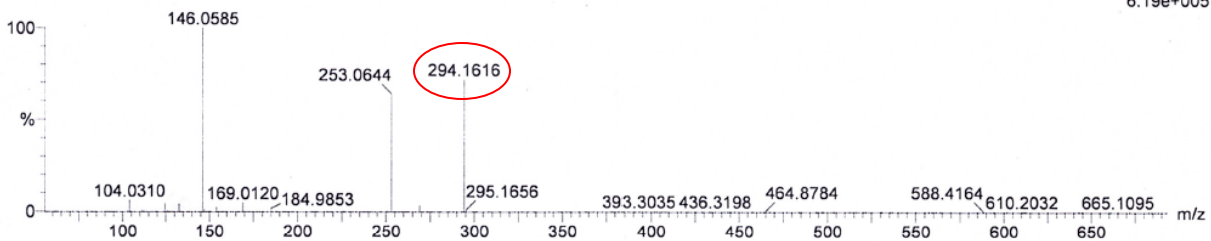

Minimum: -1.5  
Maximum: 50.0

| Mass     | Calc. Mass | mDa | PPM | DBE  | i-FIT | Norm | Conf(%) | Formula      |
|----------|------------|-----|-----|------|-------|------|---------|--------------|
| 294.1616 | 294.1606   | 1.0 | 3.4 | 10.5 | 37.0  | n/a  | n/a     | C18 H20 N3 O |

### <sup>1</sup>H-NMR of 1-(4-methoxyphenethyl)-3-(4-methoxyphenyl)urea (3i)

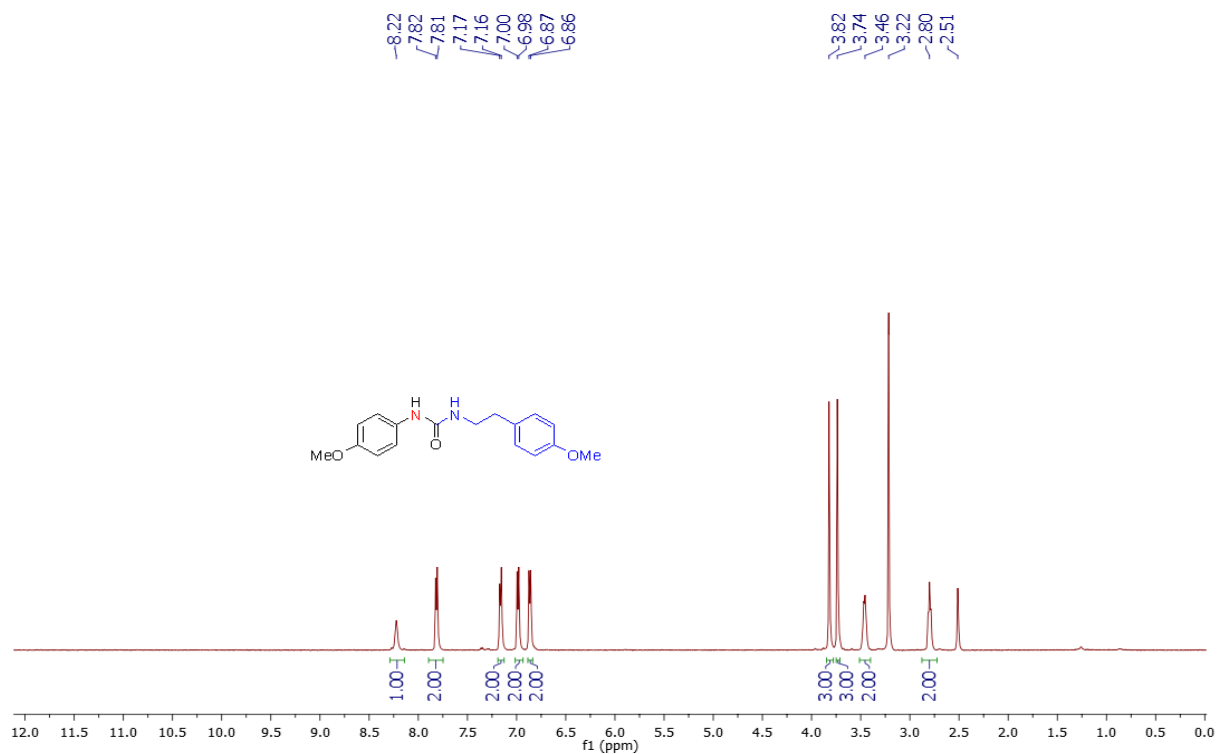

### <sup>13</sup>C-NMR of 1-(4-methoxyphenethyl)-3-(4-methoxyphenyl)urea (3i)

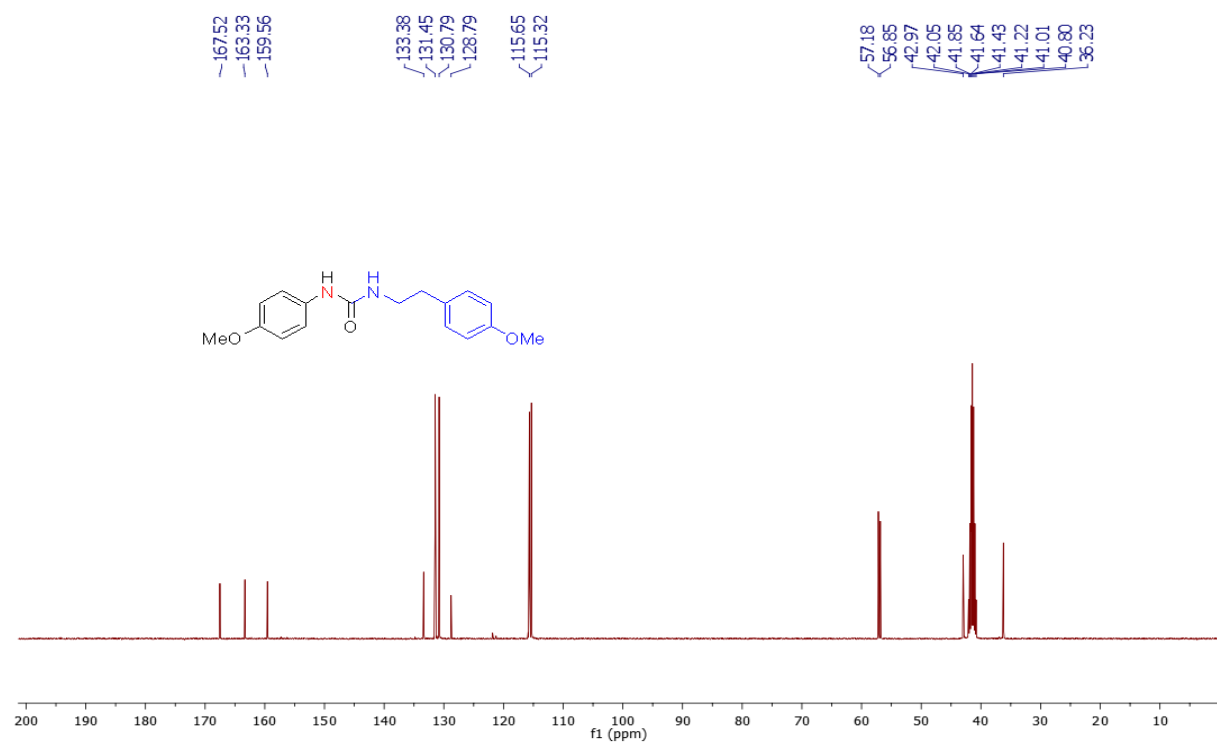

### DEPT of 1-(4-methoxyphenethyl)-3-(4-methoxyphenyl)urea (3i)

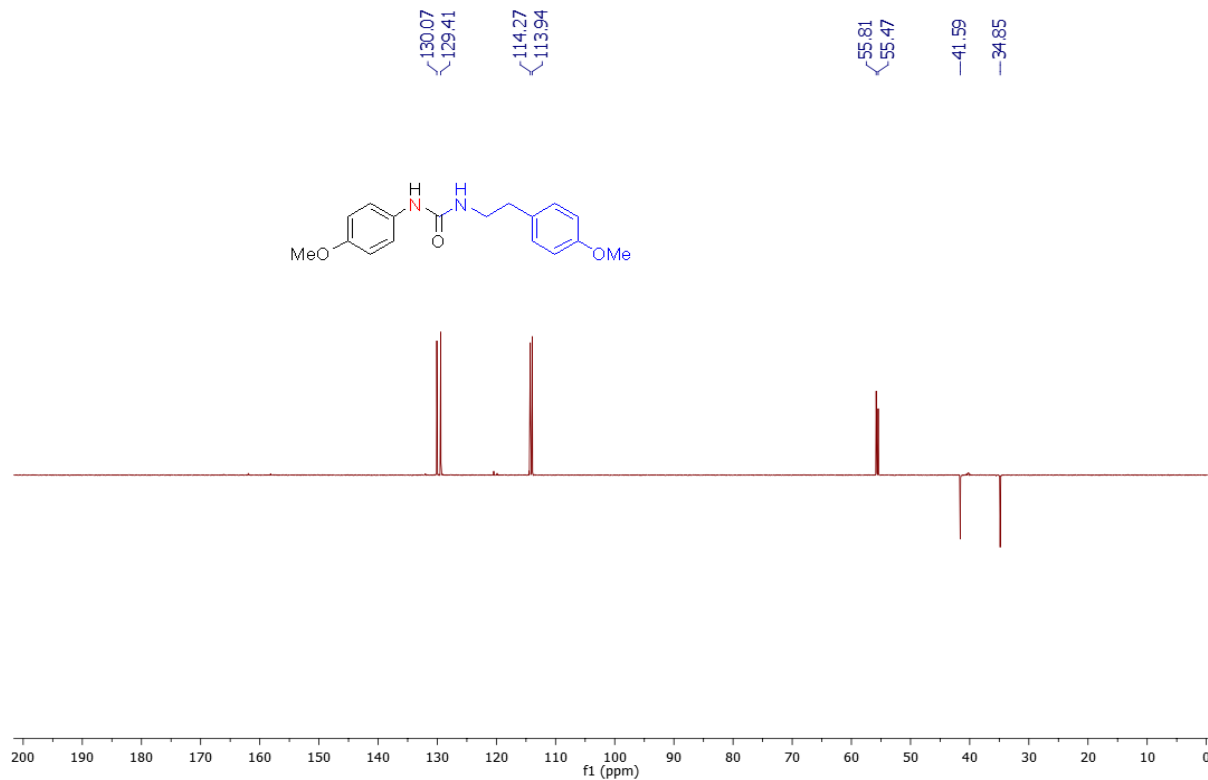

### <sup>1</sup>H-NMR of 1-(4-cyanophenyl)-3-(4-methoxyphenethyl)urea (3j)

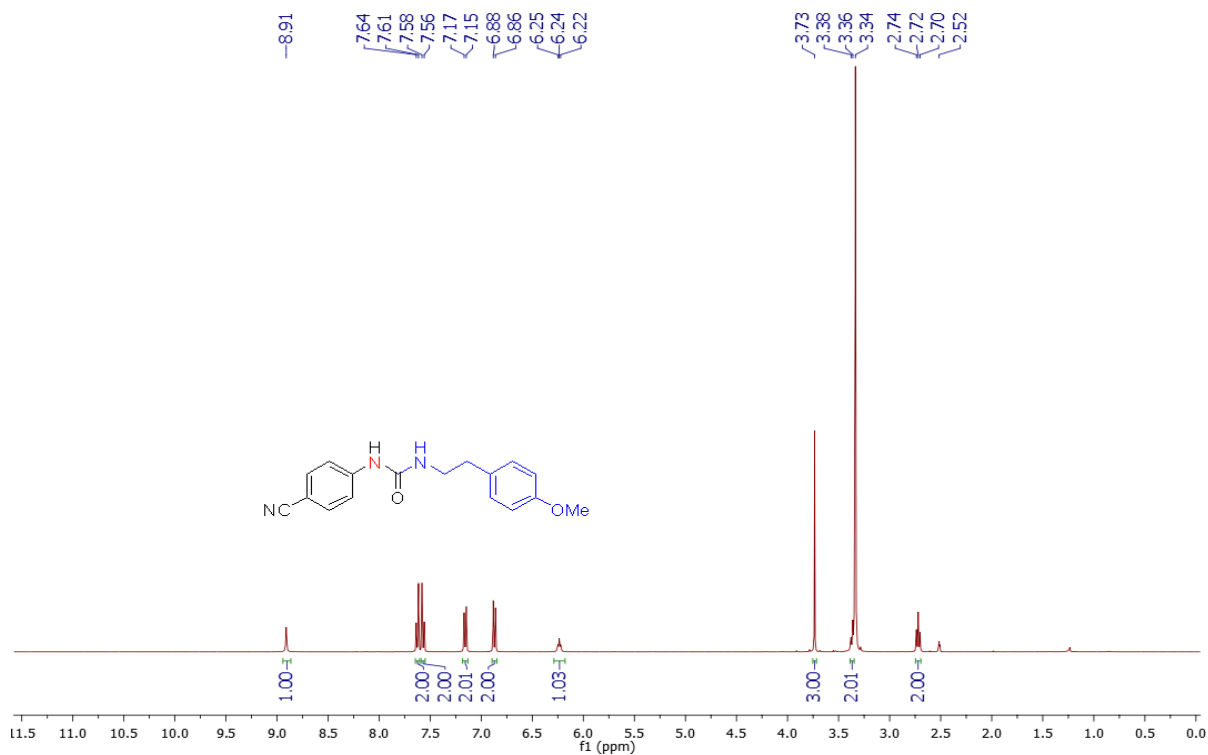

### <sup>13</sup>C-NMR of 1-(4-cyanophenyl)-3-(4-methoxyphenethyl)urea (3j)

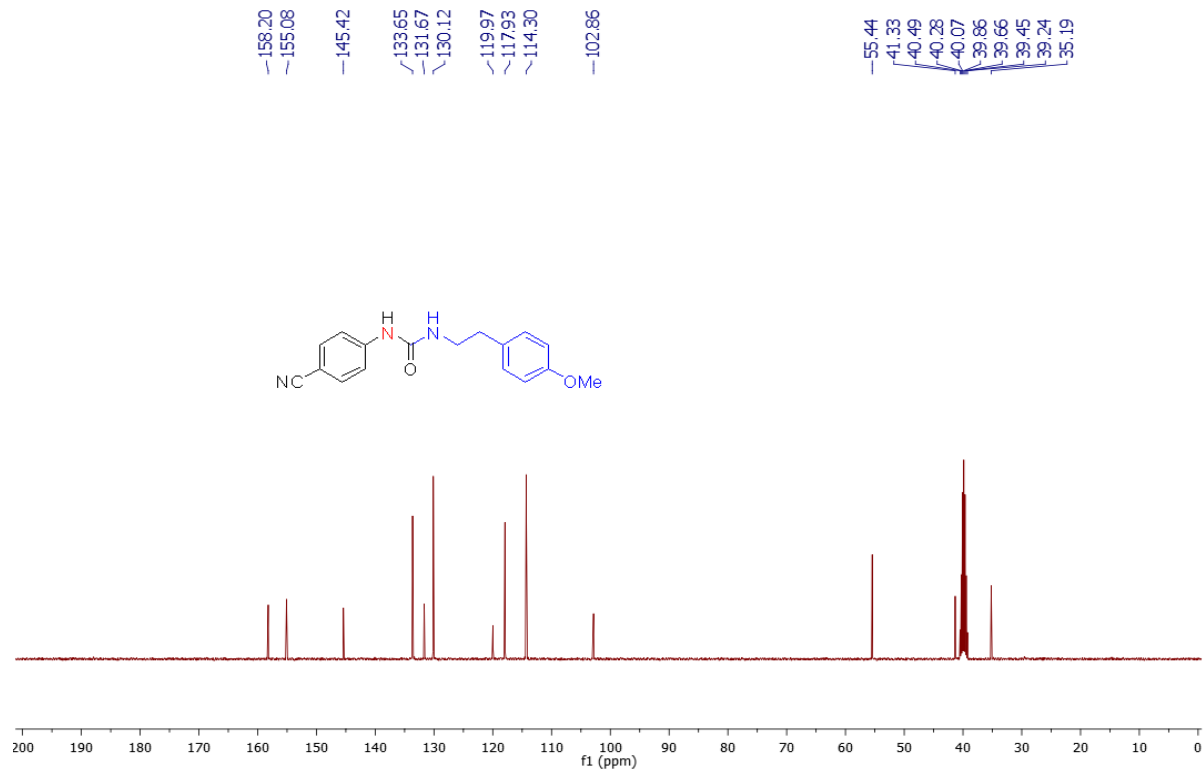

### DEPT of 1-(4-cyanophenyl)-3-(4-methoxyphenethyl)urea (3j)

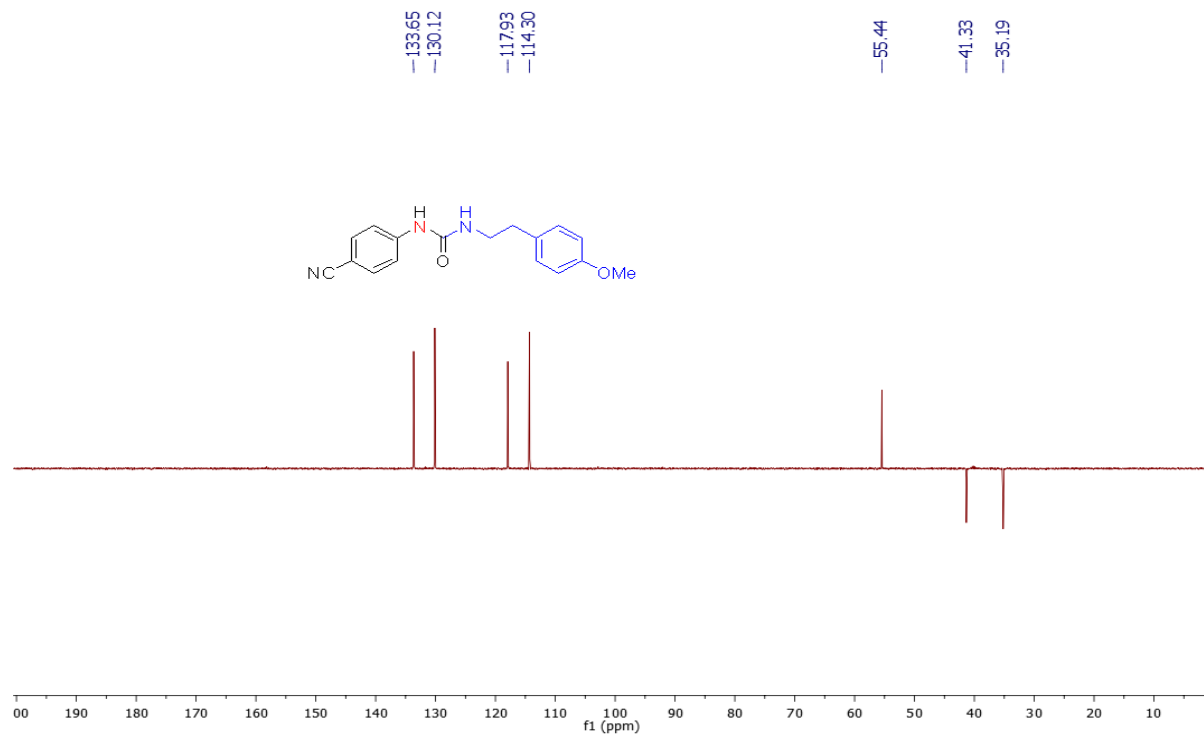

# HRMS (ESI-TOF) of compound (3j)

## Elemental Composition Report

### Single Mass Analysis

Tolerance = 5.0 PPM / DBE: min = -1.5, max = 50.0

Element prediction: Off

Number of isotope peaks used for i-FIT = 3

Monoisotopic Mass, Even Electron Ions

16 formula(e) evaluated with 1 results within limits (up to 3 closest results for each mass)

Elements Used:

C: 0-17 H: 0-200 N: 0-3 O: 0-2

RR-104

210921\_17 23 (0.465) Cm (23)

QMI DIVISION, CSIR-IIIM JAMMU  
Xevo G2-XS QTOF YFC2015

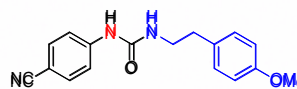

21-Sep-2021  
12:49:53  
1: TOF MS ES+  
8.05e+005

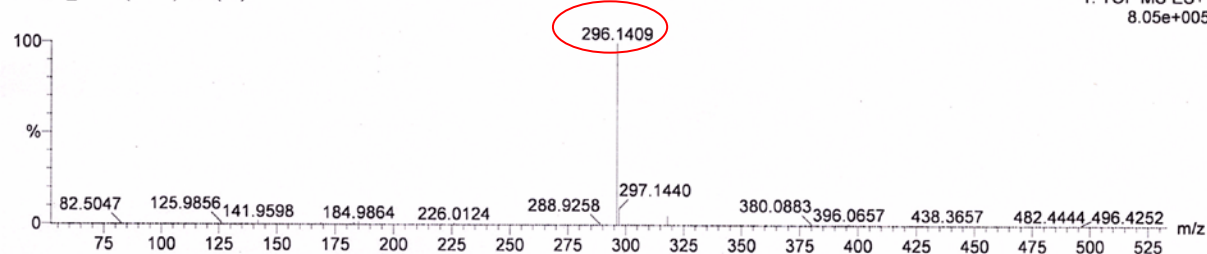

Minimum: -1.5  
Maximum: 2.0 5.0 50.0

| Mass     | Calc. Mass | mDa | PPM | DBE  | i-FIT | Norm | Conf(%) | Formula       |
|----------|------------|-----|-----|------|-------|------|---------|---------------|
| 296.1409 | 296.1399   | 1.0 | 3.4 | 10.5 | 46.3  | n/a  | n/a     | C17 H18 N3 O2 |

# <sup>1</sup>H-NMR of 1-(3,5-difluorobenzyl)-3-(4-methoxyphenyl)urea (3k)

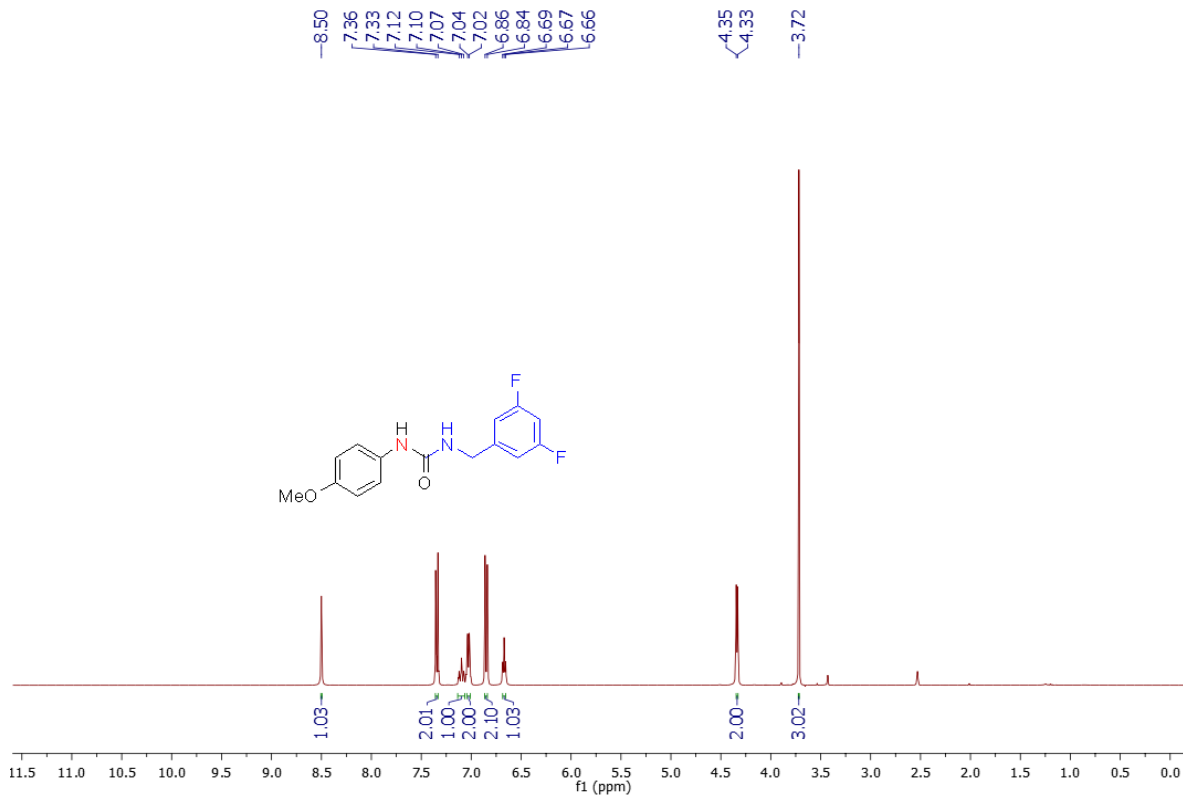

### <sup>19</sup>F-NMR of 1-(3,5-difluorobenzyl)-3-(4-methoxyphenyl)urea (3k)

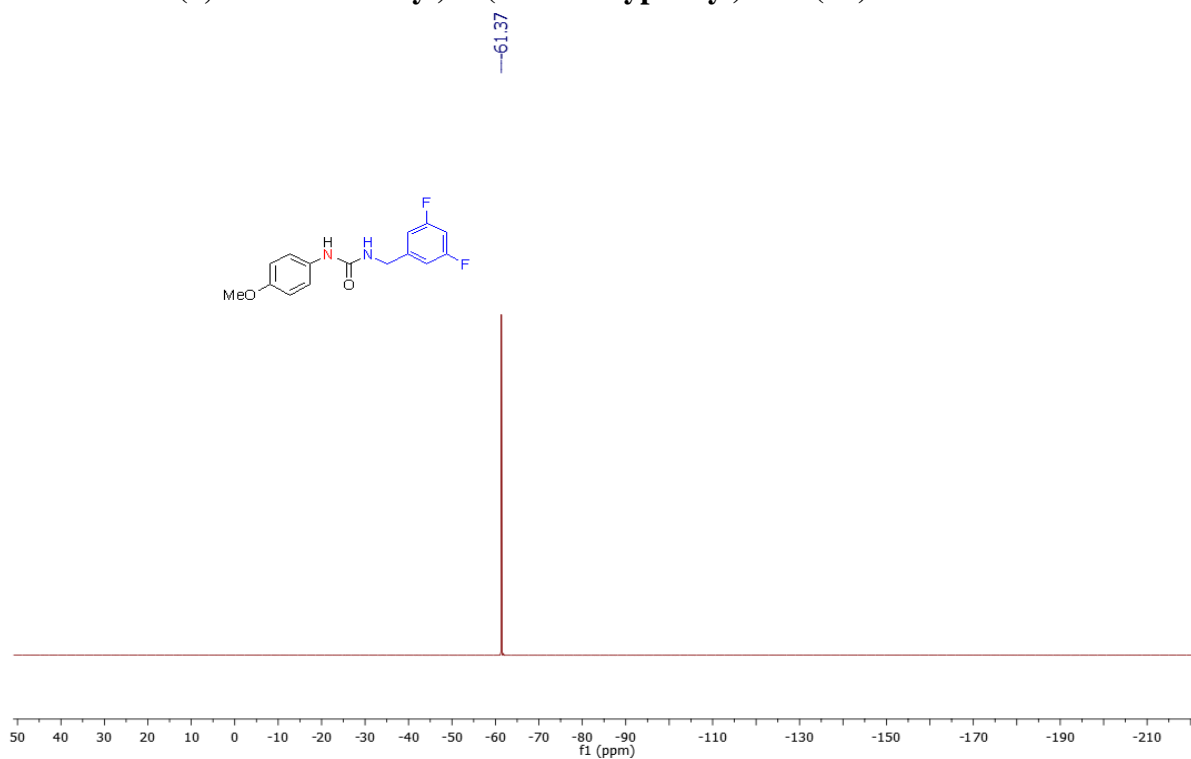

### <sup>13</sup>C-NMR of 1-(3,5-difluorobenzyl)-3-(4-methoxyphenyl)urea (3k)

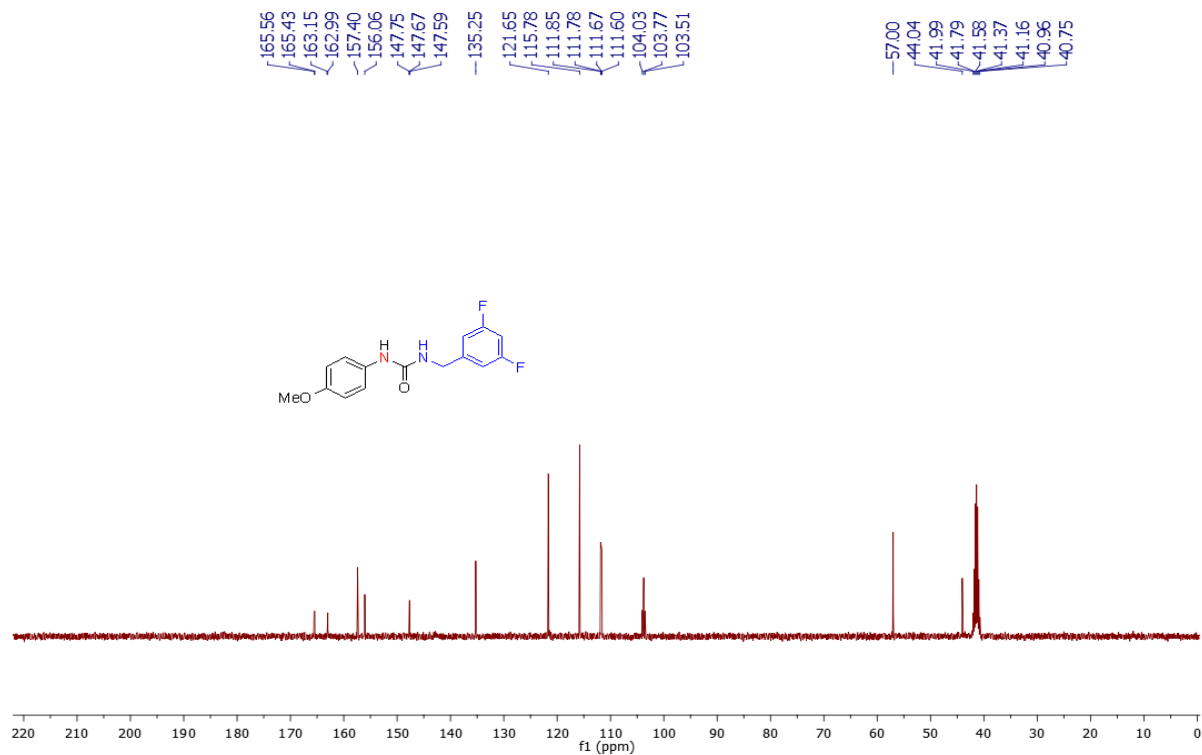



# DEPT of 1-(3,5-difluorobenzyl)-3-(4-methoxyphenyl)urea (3k)

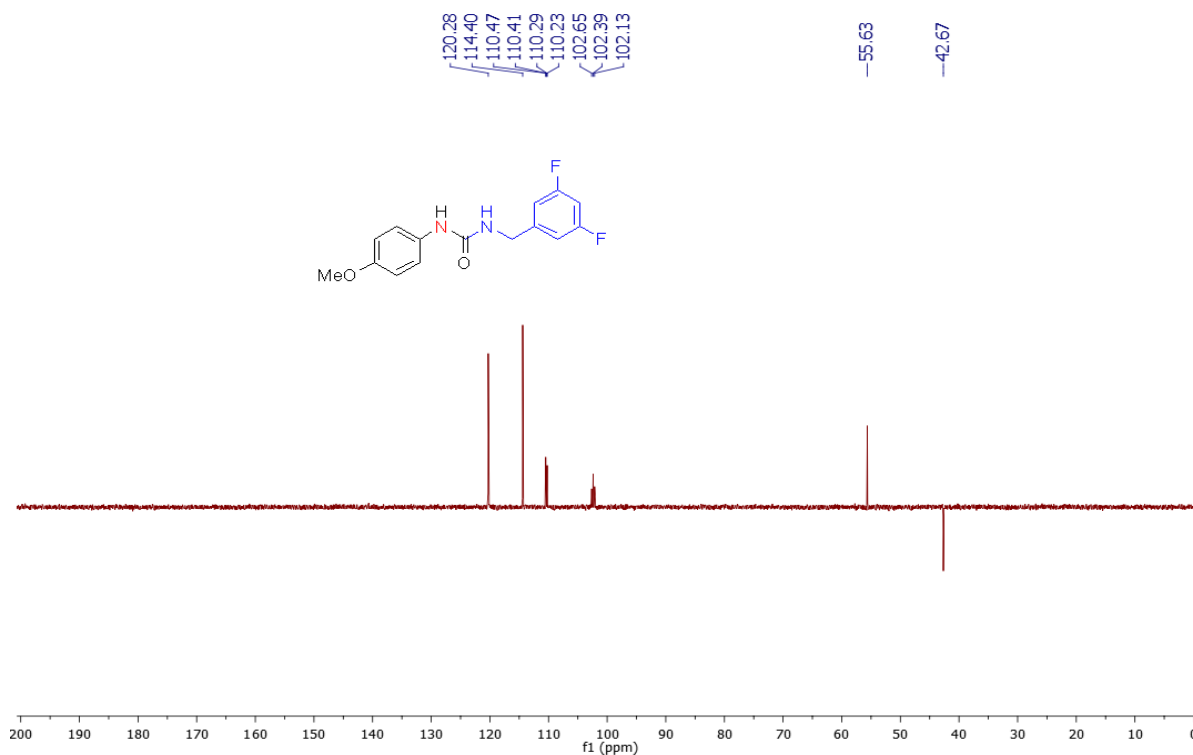

## HRMS (ESI-TOF) of compound (3k)

### Elemental Composition Report

Page 1

#### Single Mass Analysis

Tolerance = 5.0 PPM / DBE: min = -1.5, max = 50.0  
 Element prediction: Off  
 Number of isotope peaks used for i-FIT = 3

Monoisotopic Mass, Even Electron Ions

28 formula(e) evaluated with 1 results within limits (up to 3 closest results for each mass)

Elements Used:

C: 0-15 H: 0-200 N: 0-2 O: 0-2 F: 0-2

F-146

200921\_17 38 (0.758) Cm (38:39)

QMI DIVISION, CSIR-IIIM JAMMU  
 Xevo G2-XS QTOF YFC2015

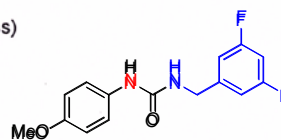

20-Sep-2021  
 12:40:15  
 1: TOF MS ES+  
 1.25e+006

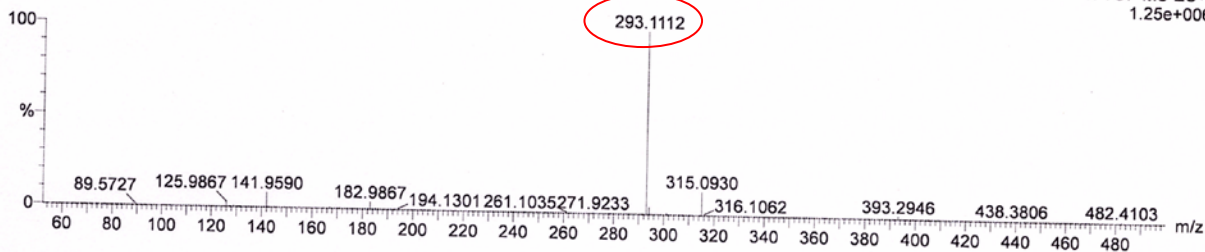

Minimum: -1.5  
 Maximum: 2.0 5.0 50.0

| Mass     | Calc. Mass | mDa | PPM | DBE | i-FIT | Norm | Conf (%) | Formula          |
|----------|------------|-----|-----|-----|-------|------|----------|------------------|
| 293.1112 | 293.1102   | 1.0 | 3.4 | 8.5 | 42.4  | n/a  | n/a      | C15 H15 N2 O2 F2 |

### <sup>1</sup>H-NMR of 1-(4-cyanophenyl)-3-(3,5-difluorobenzyl)urea (3l)

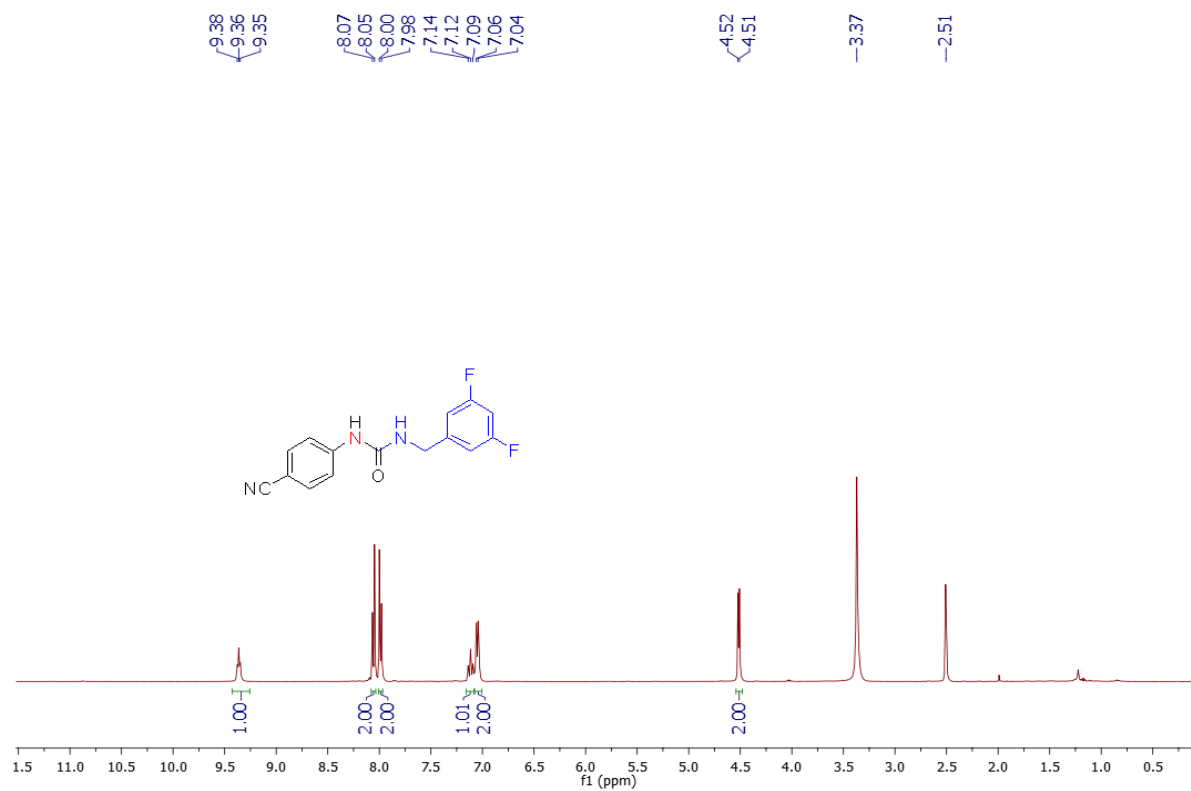

### <sup>19</sup>F-NMR of 1-(4-cyanophenyl)-3-(3,5-difluorobenzyl)urea (3l)

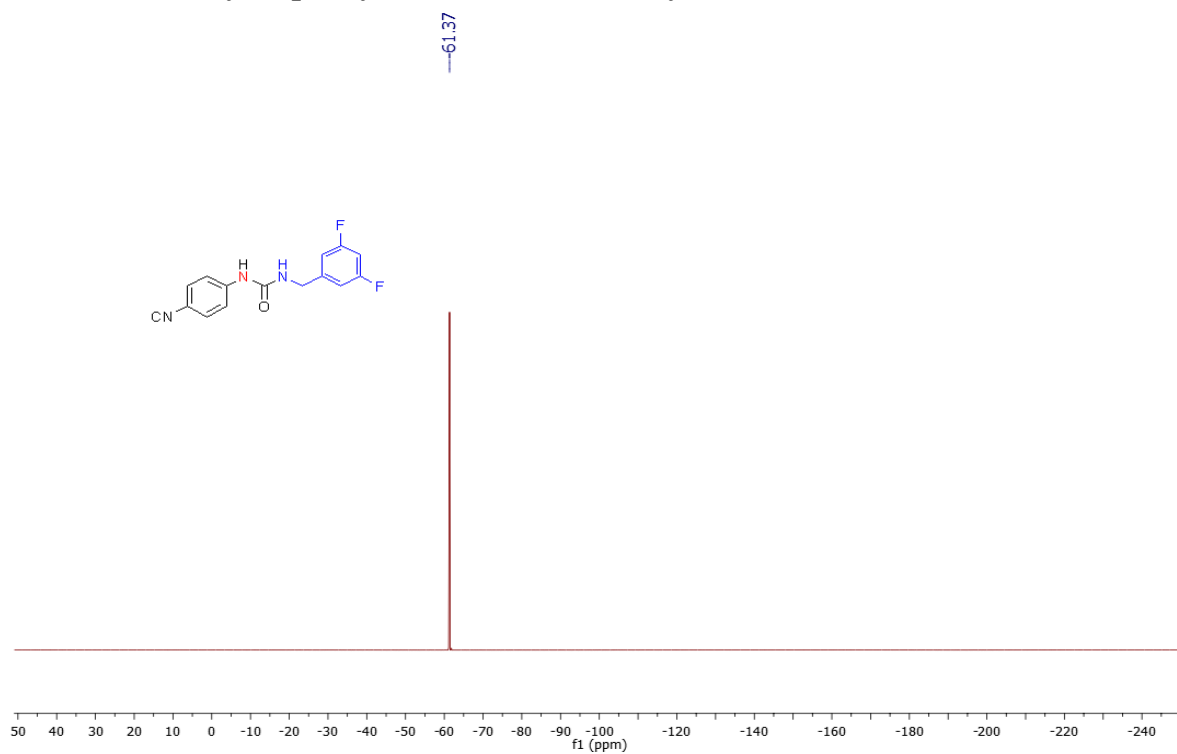

### <sup>13</sup>C-NMR of 1-(4-cyanophenyl)-3-(3,5-difluorobenzyl)urea (3l)

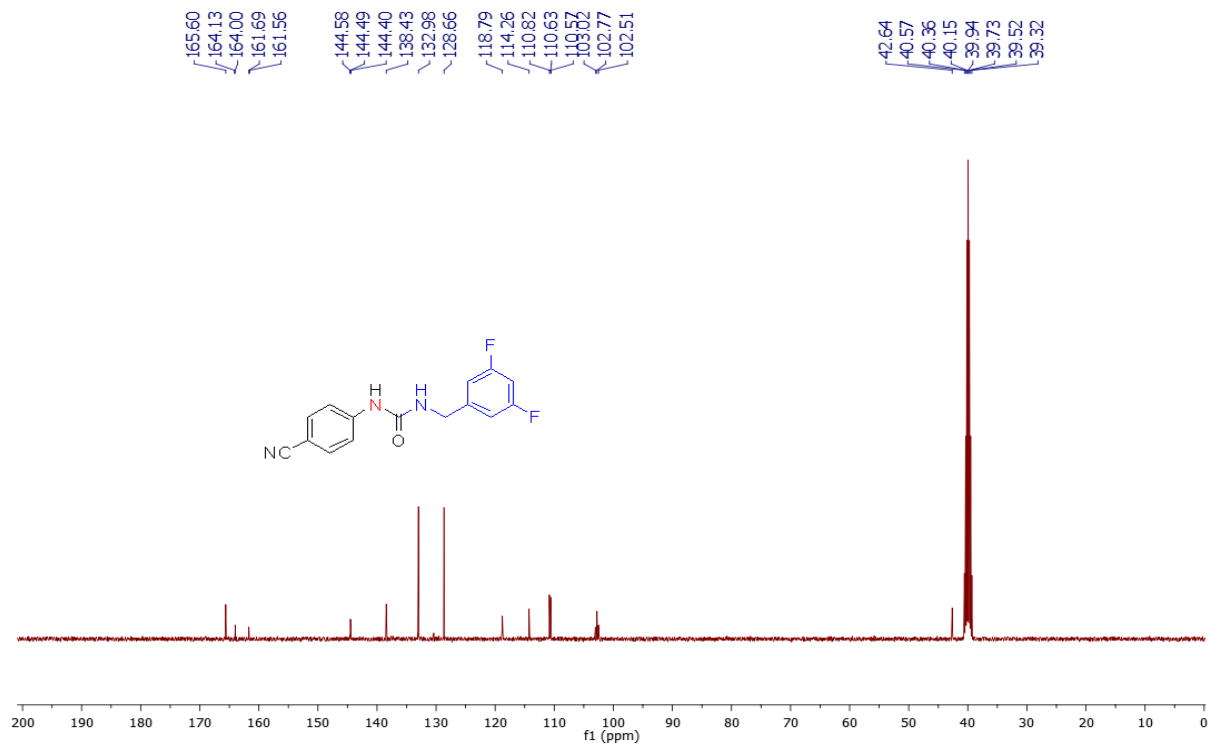

### DEPT of 1-(4-cyanophenyl)-3-(3,5-difluorobenzyl)urea (3l)

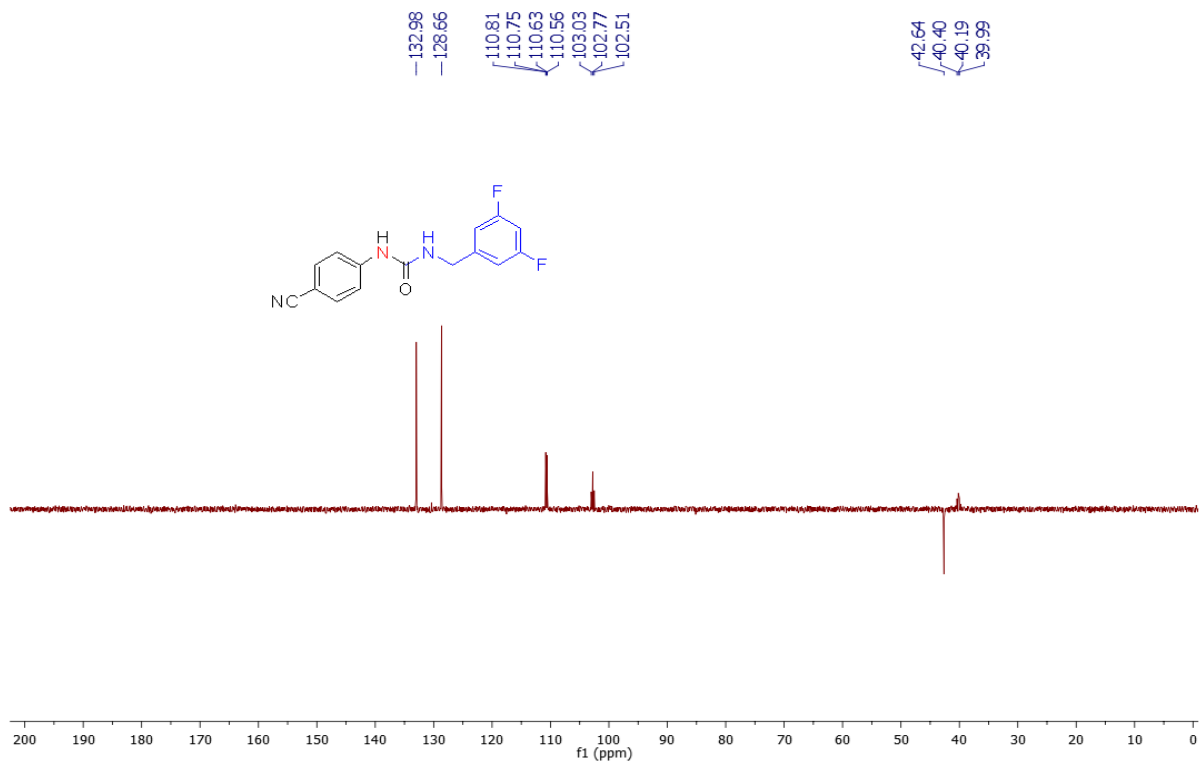

# HRMS of 1-(4-cyanophenyl)-3-(3,5-difluorobenzyl)urea (3l)

## Elemental Composition Report

Page 1

### Single Mass Analysis

Tolerance = 5.0 PPM / DBE: min = -1.5, max = 50.0

Element prediction: Off

Number of isotope peaks used for i-FIT = 3

Monoisotopic Mass, Even Electron Ions

28 formula(e) evaluated with 1 results within limits (up to 3 closest results for each mass)

Elements Used:

C: 0-15 H: 0-200 N: 0-3 O: 0-1 F: 0-2

3L

310122\_07 8 (0.172) Cm (8)

QMI DIVISION, CSIR-IIIM JAMMU  
Xevo G2-XS QTOF YFC2015

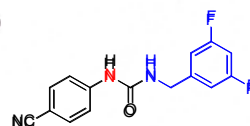

31-Jan-2022  
12:30:07  
1: TOF MS AP+  
1.73e+006

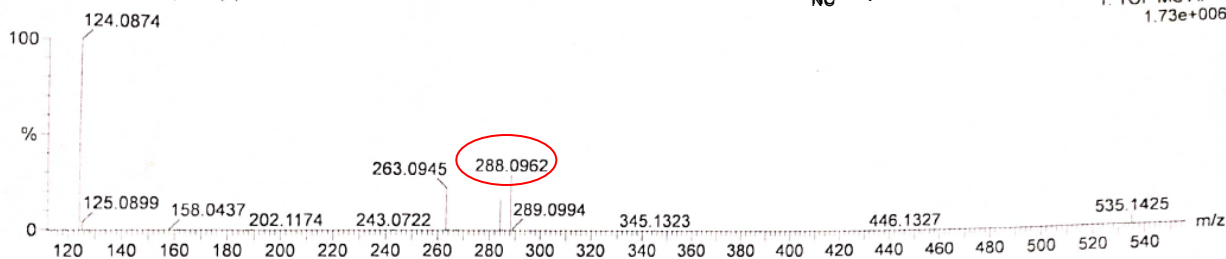

Minimum: -1.5  
Maximum: 2.0 5.0 50.0

| Mass     | Calc. Mass | mDa | PPM | DBE  | i-FIT | Norm | Conf (%) | Formula         |
|----------|------------|-----|-----|------|-------|------|----------|-----------------|
| 288.0962 | 288.0948   | 1.4 | 4.9 | 10.5 | 37.1  | n/a  | n/a      | C15 H12 N3 O F2 |

# <sup>1</sup>H-NMR of 1-(4-methoxyphenyl)-3-(4-methylbenzyl)urea (3m)

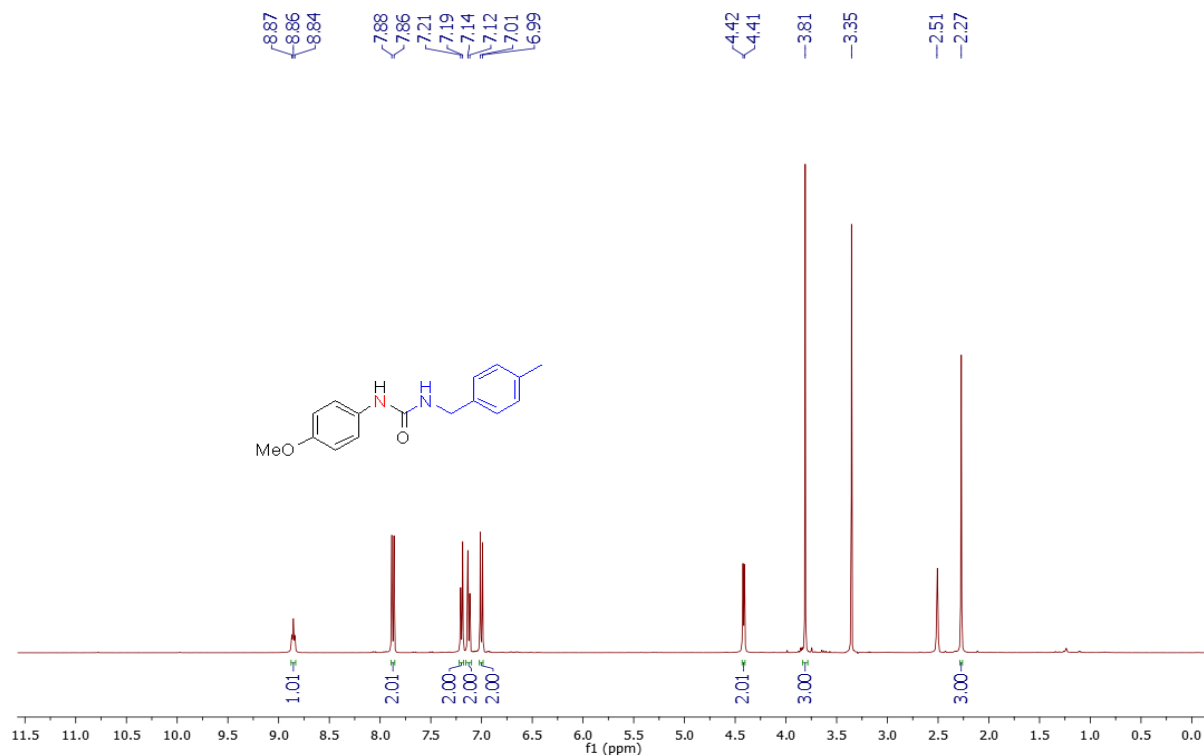

### <sup>13</sup>C-NMR of 1-(4-methoxyphenyl)-3-(4-methylbenzyl)urea (3m)

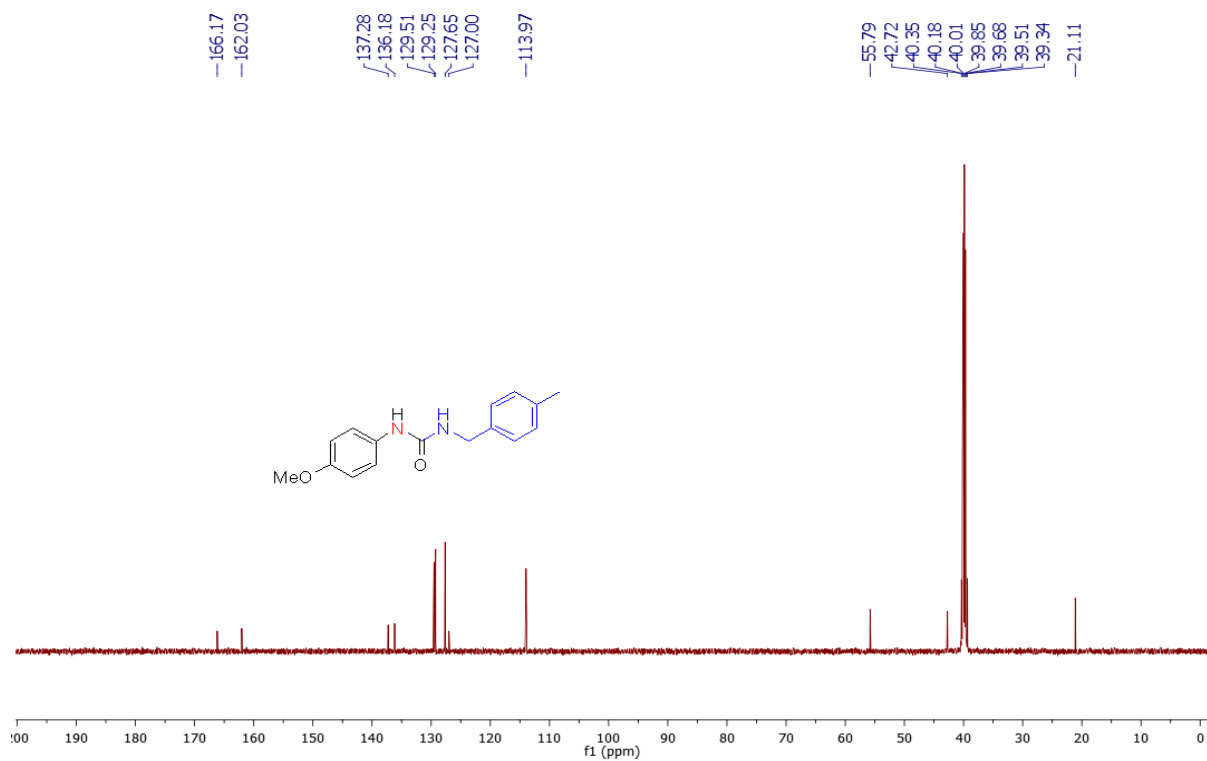

### DEPT of 1-(4-methoxyphenyl)-3-(4-methylbenzyl)urea (3m)

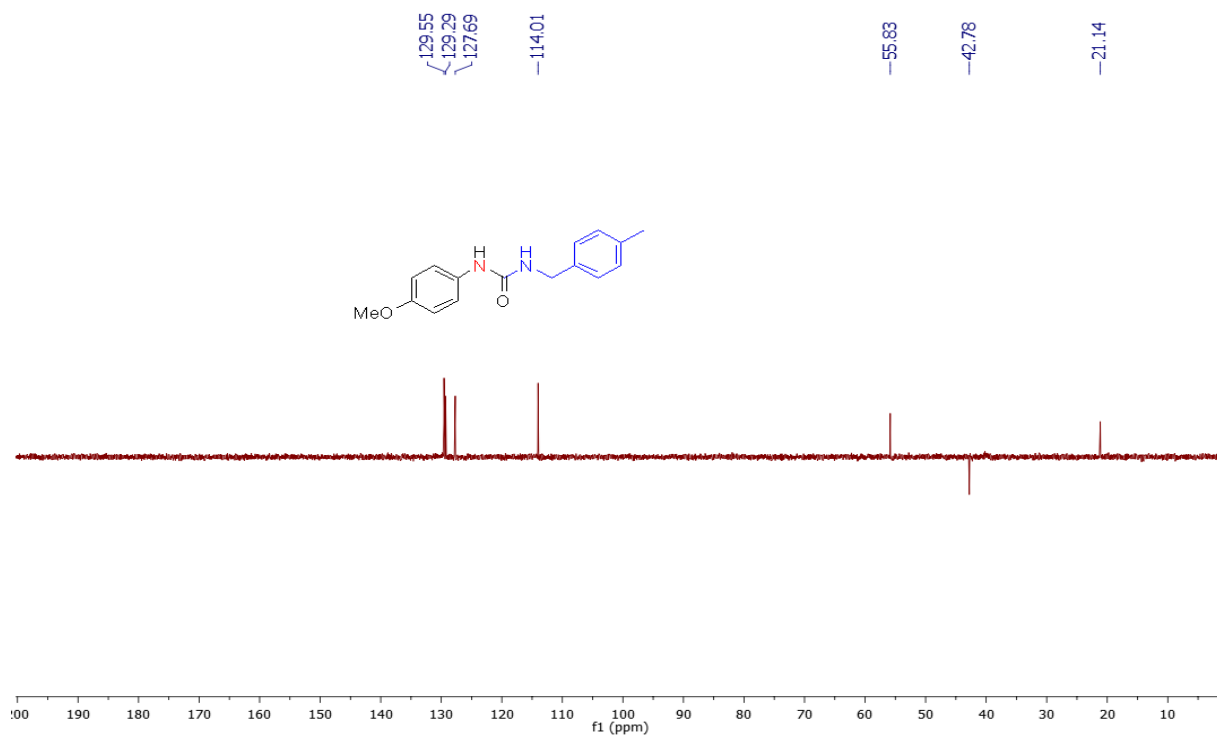

### <sup>1</sup>H-NMR of 1-(4-cyanophenyl)-3-(4-methylbenzyl)urea (3n)

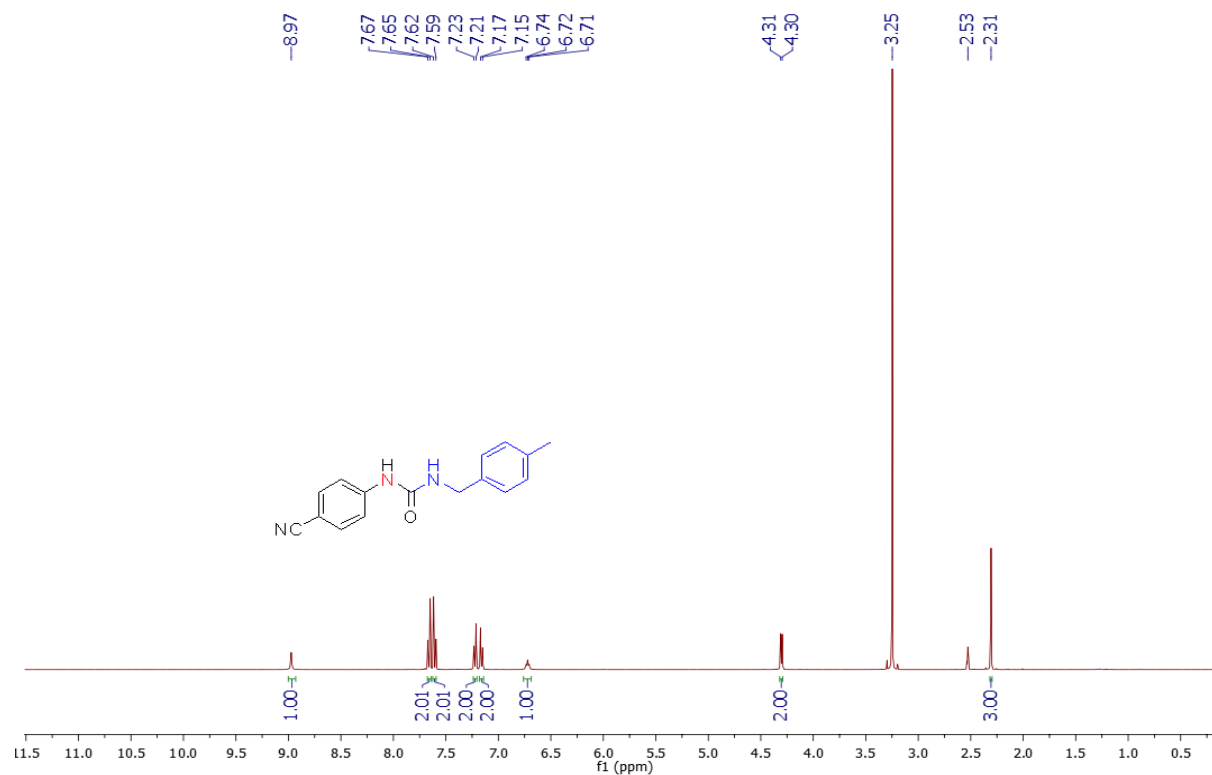

### <sup>13</sup>C-NMR of 1-(4-cyanophenyl)-3-(4-methylbenzyl)urea (3n)

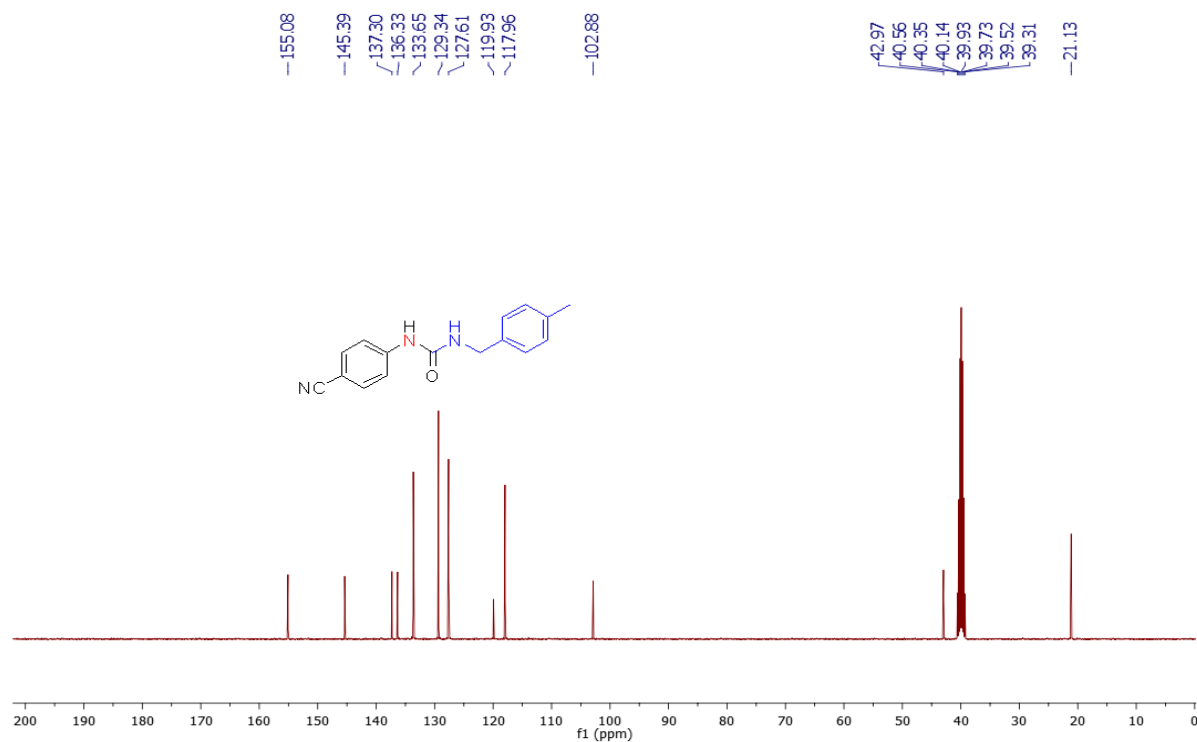

# DEPT of 1-(4-cyanophenyl)-3-(4-methylbenzyl)urea (3n)

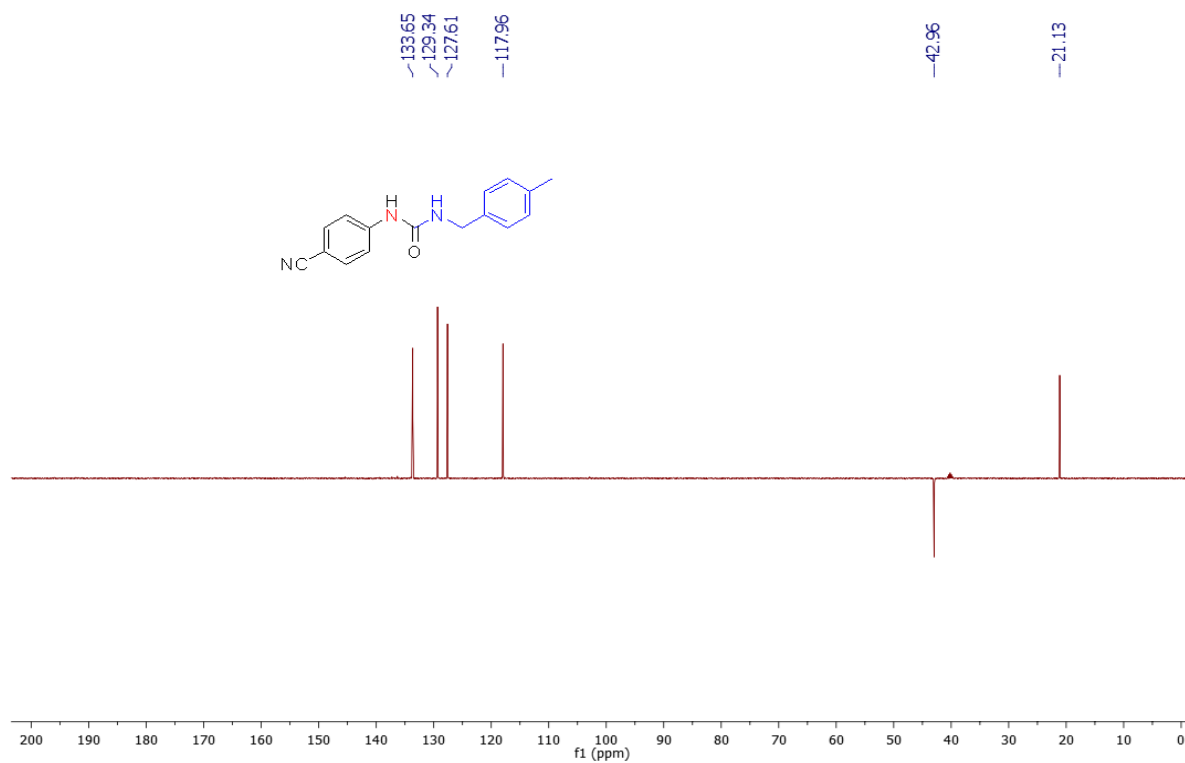

# Mass spectra of 1-(4-cyanophenyl)-3-(4-methylbenzyl)urea (3n)

## Sample Information

|                  |                              |              |                        |
|------------------|------------------------------|--------------|------------------------|
| Sample Name      | : 3N                         | Sample ID    | :                      |
| Tray#            | : 1                          | Vial#        | : 78                   |
| Injection Volume | : 0.5                        | Data File    | : 28-JAN-22-50.lcd     |
| Method File      | : MASS SCANN 13APRIL2021.lcm | Processed by | : System Administrator |
| Date Processed   | : 1/28/2022 5:39:17 PM       |              |                        |

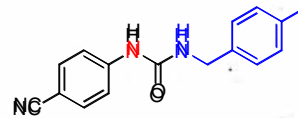

MS Spectrum

BG Mode:None \$Endf\$ Segment 1 - Event 1  
Product Ion Scan Precursor:266.0000 CE:-10.0

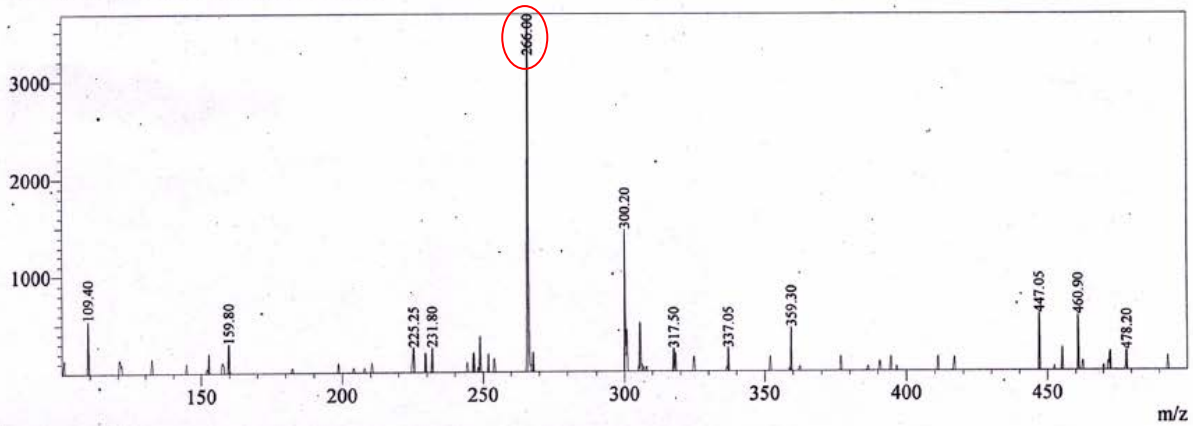

BG Mode:None \$Endf\$ Segment 1 - Event 2  
Product Ion Scan Precursor:265.0000 CE:10.0

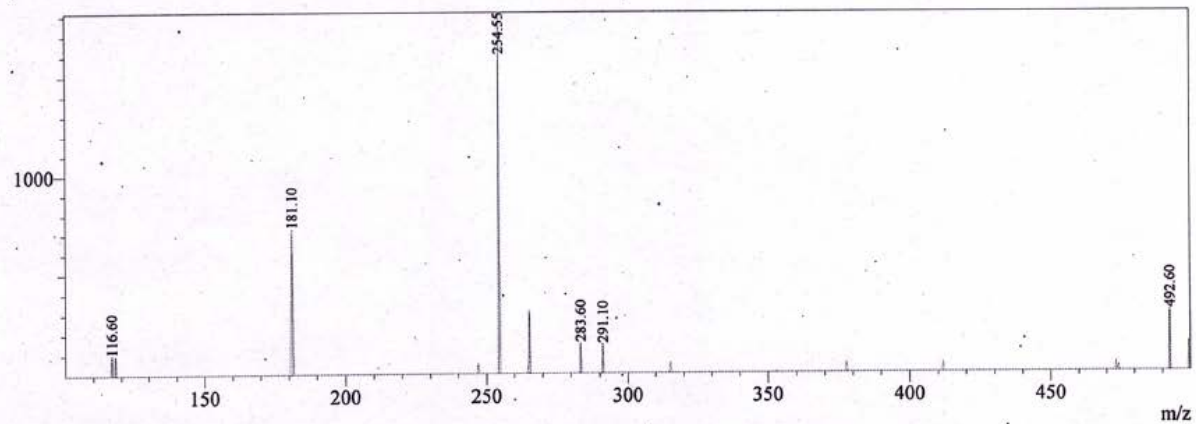



### <sup>1</sup>H-NMR of 1-(6-fluoropyridin-3-yl)-3-(4-methoxyphenyl)urea (3o)

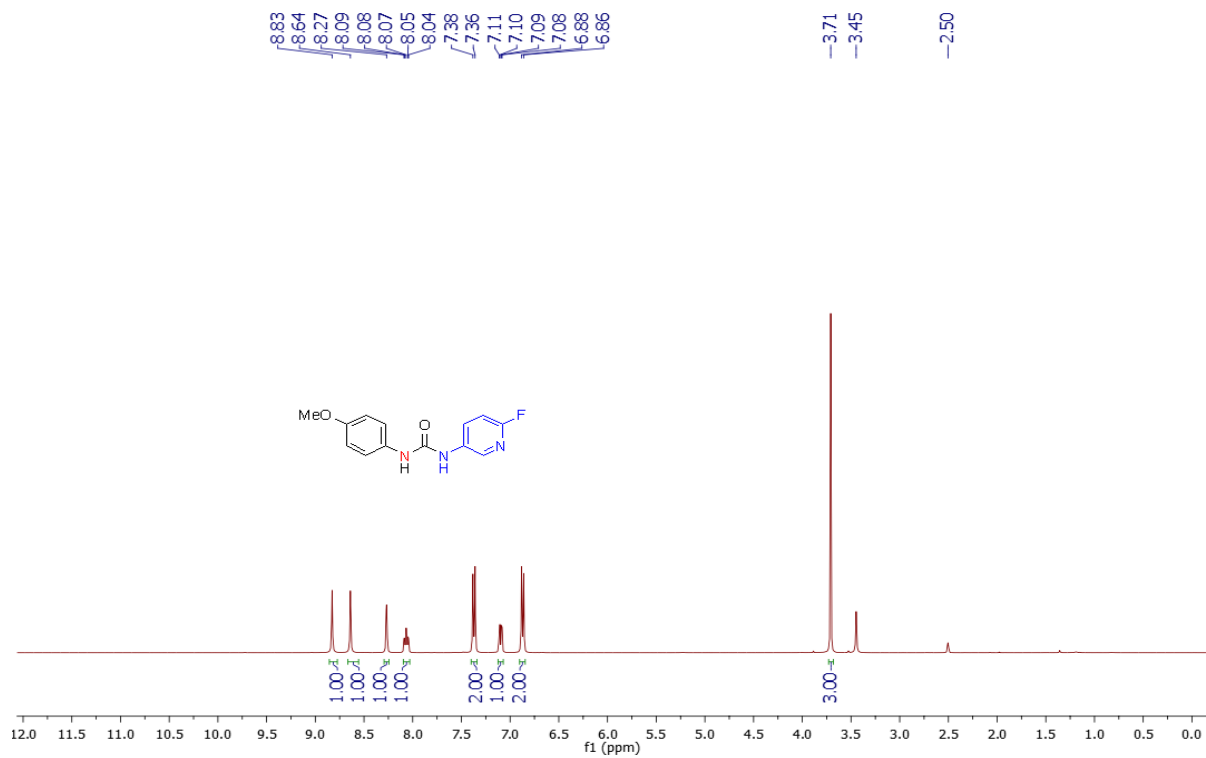

### <sup>19</sup>F-NMR of 1-(6-fluoropyridin-3-yl)-3-(4-methoxyphenyl)urea (3o)

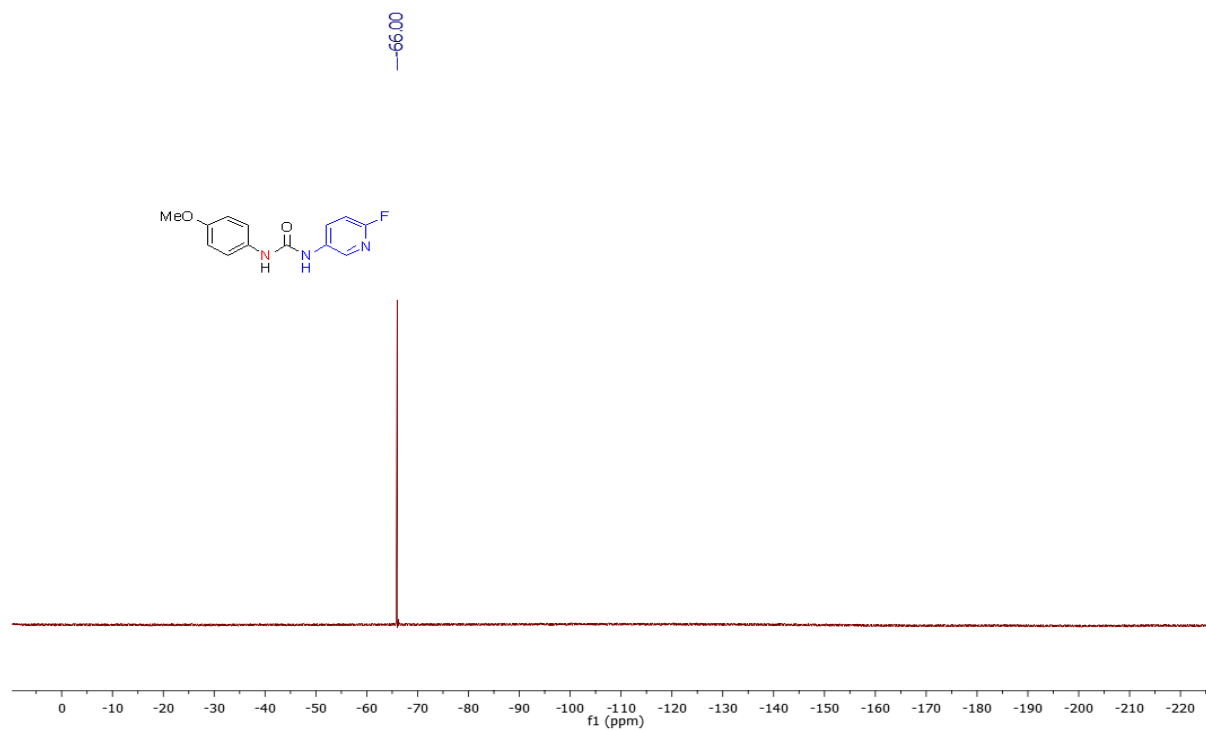

### <sup>13</sup>C-NMR of 1-(6-fluoropyridin-3-yl)-3-(4-methoxyphenyl)urea (3o)

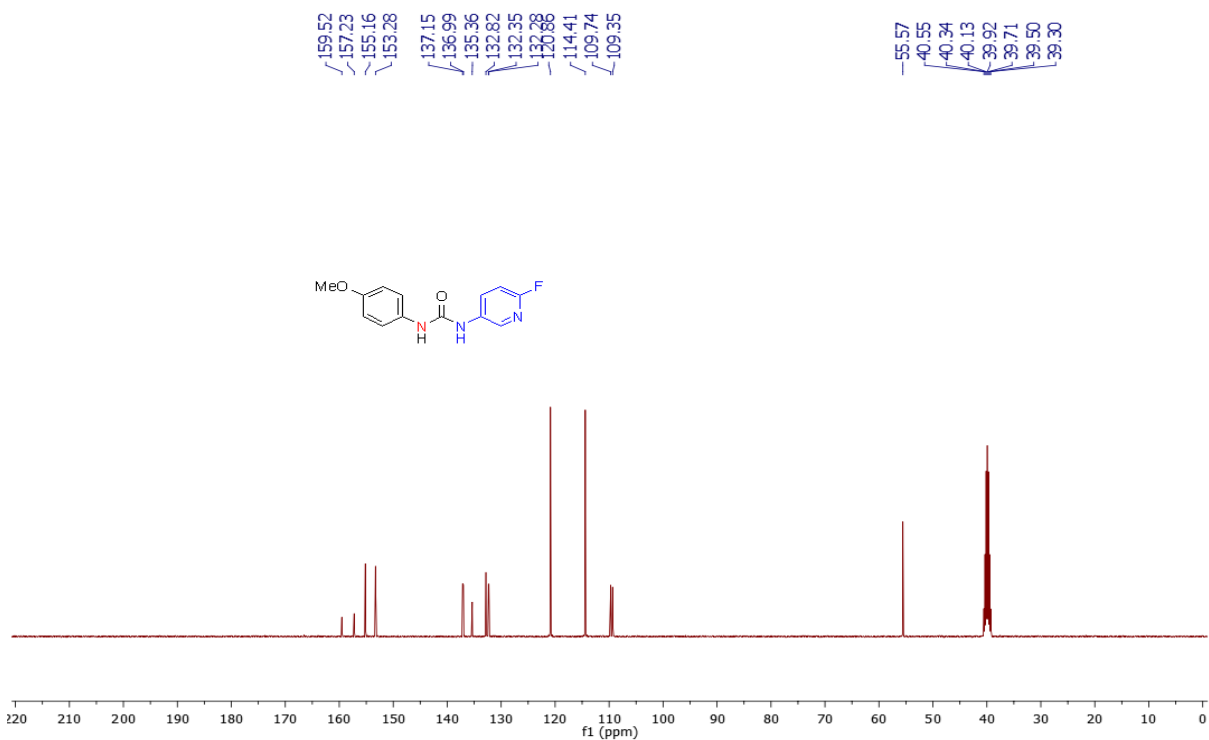

### DEPT of 1-(6-fluoropyridin-3-yl)-3-(4-methoxyphenyl)urea (3o)

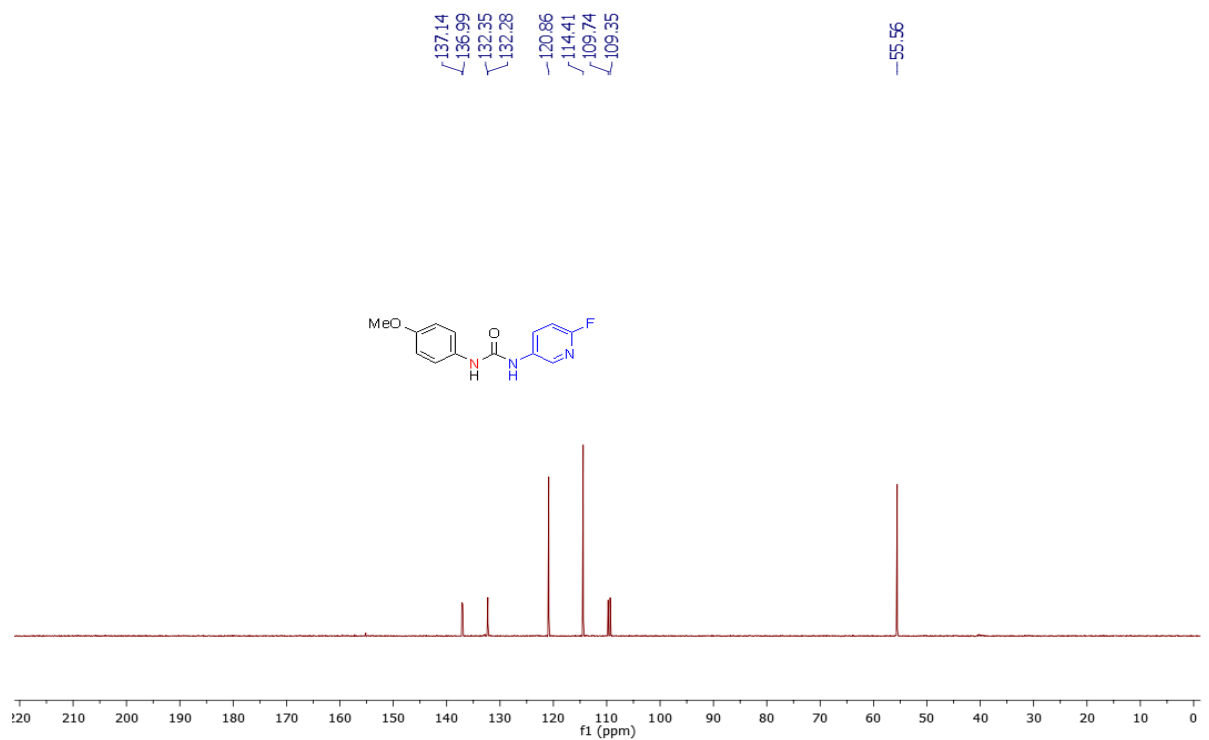

# HRMS of 1-(6-fluoropyridin-3-yl)-3-(4-methoxyphenyl)urea (3o)

## Elemental Composition Report

Page 1

### Single Mass Analysis

Tolerance = 50.0 PPM / DBE: min = -1.5, max = 50.0

Element prediction: Off

Number of isotope peaks used for i-FIT = 3

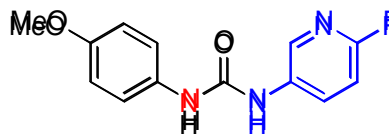

Monoisotopic Mass, Even Electron Ions

25 formula(e) evaluated with 1 results within limits (up to 3 closest results for each mass)

Elements Used:

C: 0-13 H: 0-100 N: 0-3 O: 0-2 F: 0-1

F-4

QMI DIVISION, CSIR-IIIM JAMMU  
Xevo G2-XS QTOF YFC2015

08-Apr-2022

13:02:56

1: TOF MS ES+

2.64e+006

080422\_16 17 (0.363) Cm (17)

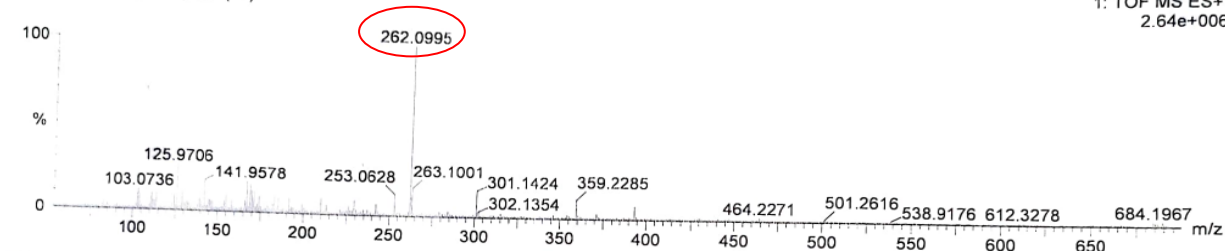

Minimum: -1.5  
Maximum: 2.0 50.0 50.0

| Mass     | Calc. Mass | mDa | PPM | DBE | i-FIT | Norm | Conf (%) | Formula         |
|----------|------------|-----|-----|-----|-------|------|----------|-----------------|
| 262.0995 | 262.0992   | 0.3 | 1.1 | 8.5 | 38.6  | n/a  | n/a      | C13 H13 N3 O2 F |

# <sup>1</sup>H-NMR of 1-(4-cyanophenyl)-3-(6-fluoropyridin-3-yl)urea (3p)

9.16  
8.89  
8.16  
7.94  
7.92  
7.58  
7.56  
7.53  
7.50  
6.96  
3.31

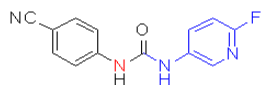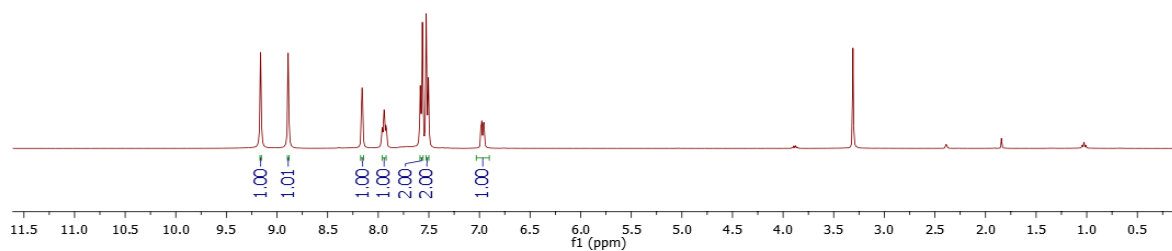

### $^{19}\text{F}$ -NMR of 1-(4-cyanophenyl)-3-(6-fluoropyridin-3-yl)urea (3p)

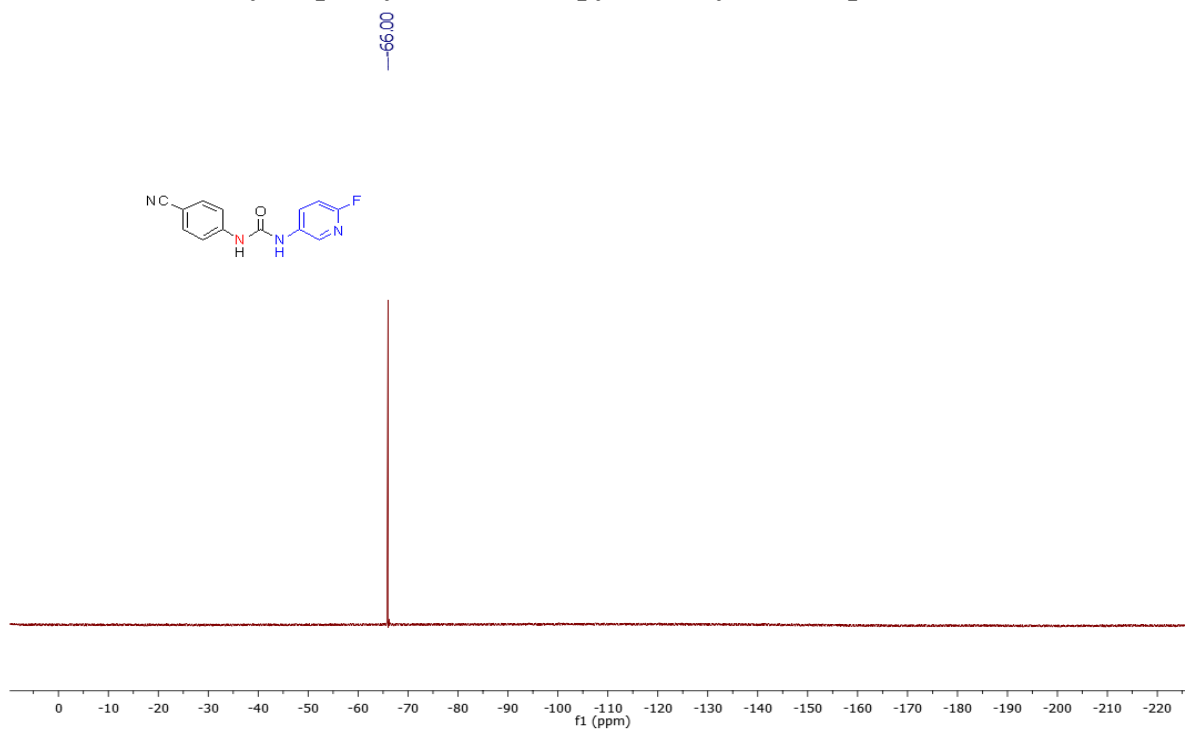

### $^{13}\text{C}$ -NMR of 1-(4-cyanophenyl)-3-(6-fluoropyridin-3-yl)urea (3p)

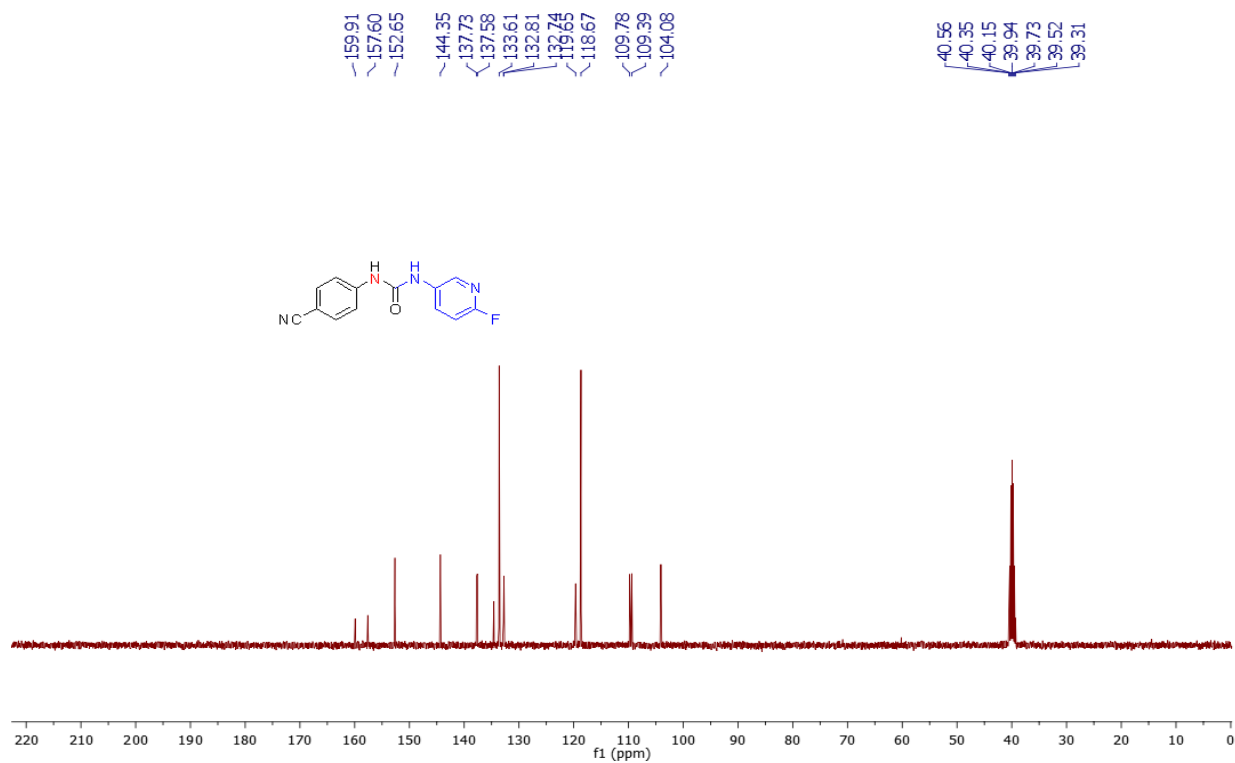

# DEPT of 1-(4-cyanophenyl)-3-(6-fluoropyridin-3-yl)urea (3p)

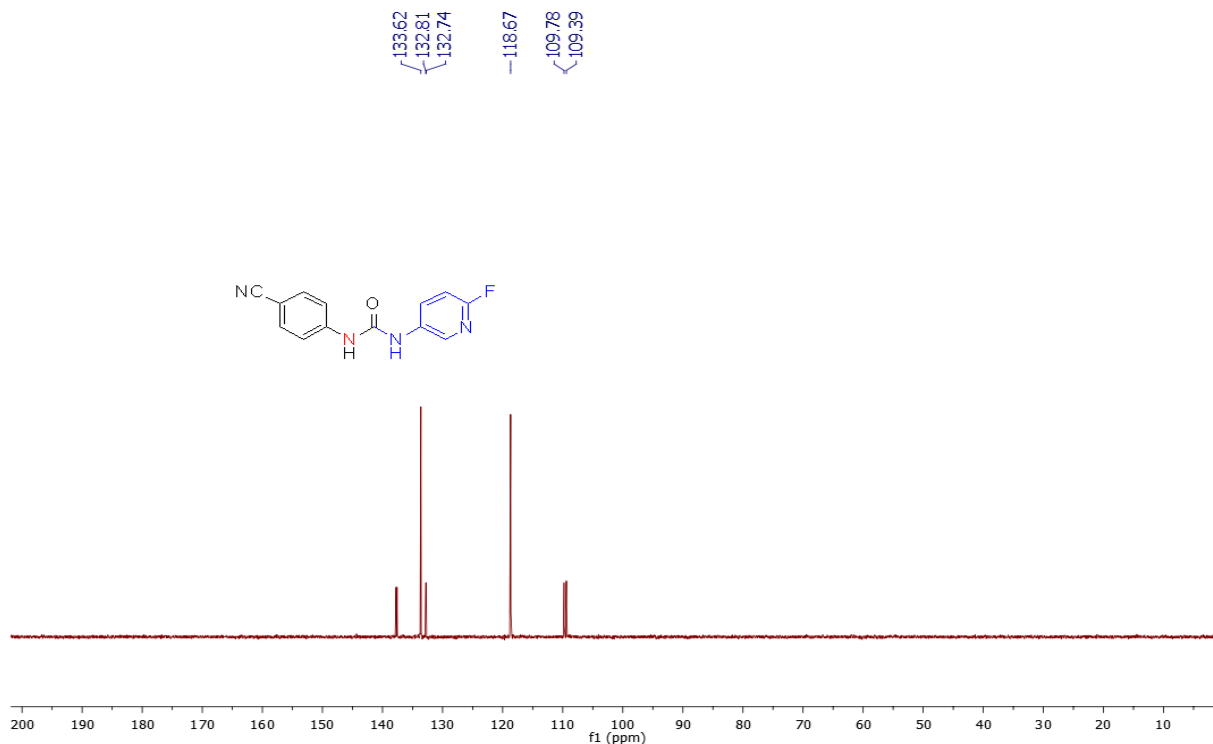

## HRMS (ESI-TOF) of compound (3p)

### Elemental Composition Report

Page 1

#### Single Mass Analysis

Tolerance = 5.0 PPM / DBE: min = -1.5, max = 50.0

Element prediction: Off

Number of isotope peaks used for i-FIT = 3

Monoisotopic Mass, Even Electron Ions

24 formula(e) evaluated with 1 results within limits (up to 3 closest results for each mass)

Elements Used:

C: 0-13 H: 0-200 N: 0-4 O: 0-1 F: 0-1

F-198

210921\_15 13 (0.276) Cm (13:14)

QMI DIVISION, CSIR-IIIM JAMMU  
Xevo G2-XS QTOF YFC2015

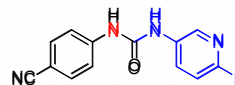

21-Sep-2021  
12:44:45  
1: TOF MS ES+  
4.75e+005

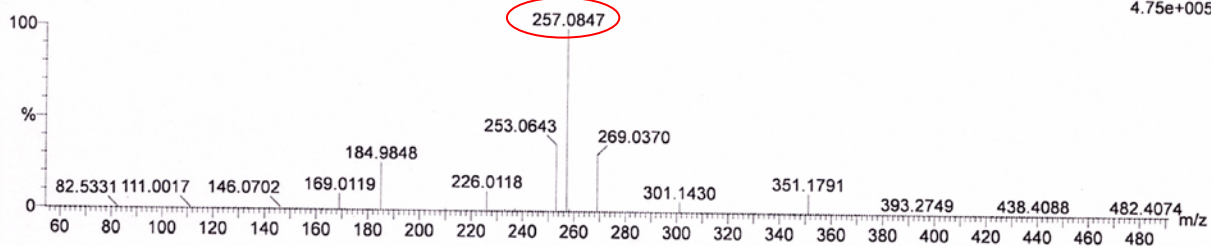

Minimum:

Maximum: 2.0 5.0 -1.5 50.0

| Mass     | Calc. Mass | mDa | PPM | DBE  | i-FIT | Norm | Conf(%) | Formula        |
|----------|------------|-----|-----|------|-------|------|---------|----------------|
| 257.0847 | 257.0839   | 0.8 | 3.1 | 10.5 | 40.9  | n/a  | n/a     | C13 H10 N4 O F |

### <sup>1</sup>H-NMR of 1-(4-methoxyphenyl)-3-pentylurea (3q)

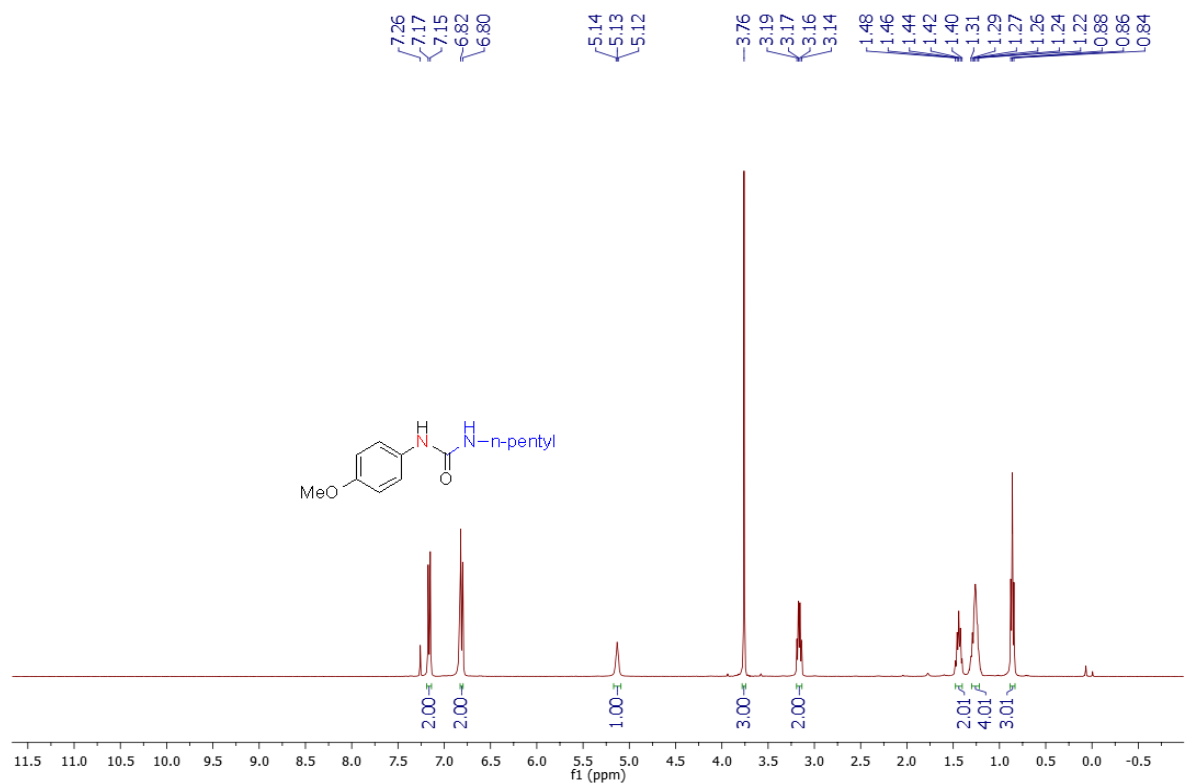

### <sup>13</sup>C-NMR of 1-(4-methoxyphenyl)-3-pentylurea (3q)

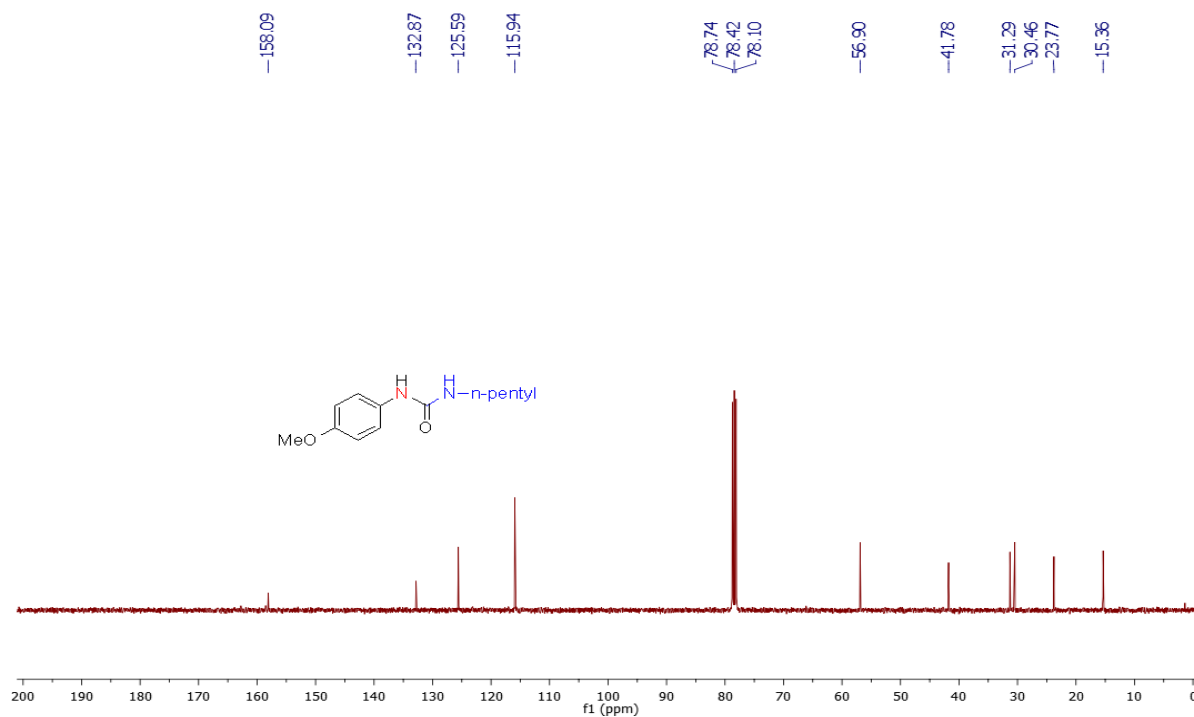

## DEPT of 1-(4-methoxyphenyl)-3-pentylurea (3q)

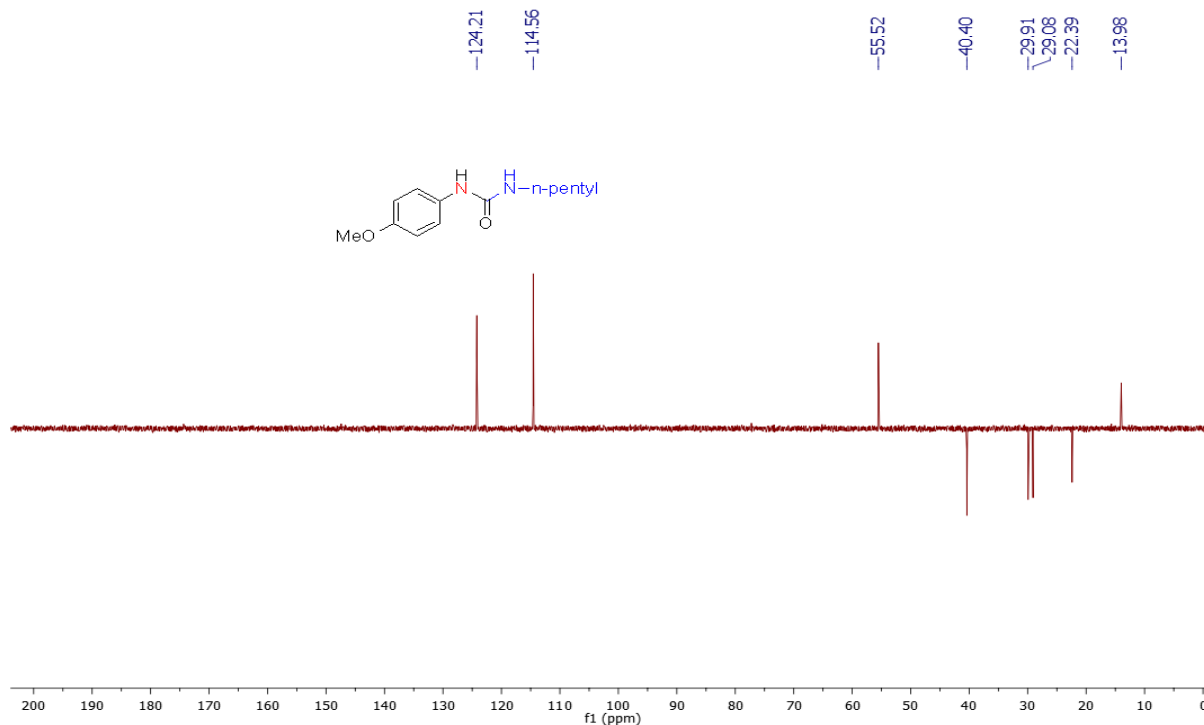

## HRMS (ESI-TOF) of compound (3q)

### Elemental Composition Report

Page 1

#### Single Mass Analysis

Tolerance = 3.0 PPM / DBE: min = -1.5, max = 50.0

Element prediction: Off

Number of isotope peaks used for i-FIT = 3

Monoisotopic Mass, Even Electron Ions

10 formula(e) evaluated with 1 results within limits (up to 3 closest results for each mass)

Elements Used:

C: 0-13 H: 0-200 N: 0-2 O: 0-2

F-151

200921\_02 22 (0.448) Cm (22)

QMI DIVISION, CSIR-IIIM JAMMU  
Xevo G2-XS QTOF YFC2015

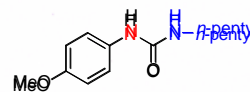

20-Sep-2021  
12:01:04  
1: TOF MS ES+  
1.49e+006

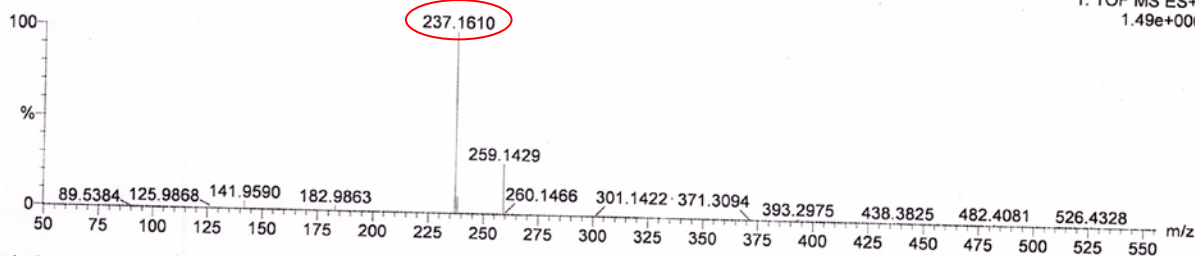

Minimum:

Maximum: 2.0 3.0 -1.5 50.0

| Mass     | Calc. Mass | mDa | PPM | DBE | i-FIT | Norm | Conf (%) | Formula       |
|----------|------------|-----|-----|-----|-------|------|----------|---------------|
| 237.1610 | 237.1603   | 0.7 | 3.0 | 4.5 | 40.3  | n/a  | n/a      | C13 H21 N2 O2 |

### <sup>1</sup>H-NMR of 1-(4-cyanophenyl)-3-pentylurea (3r)

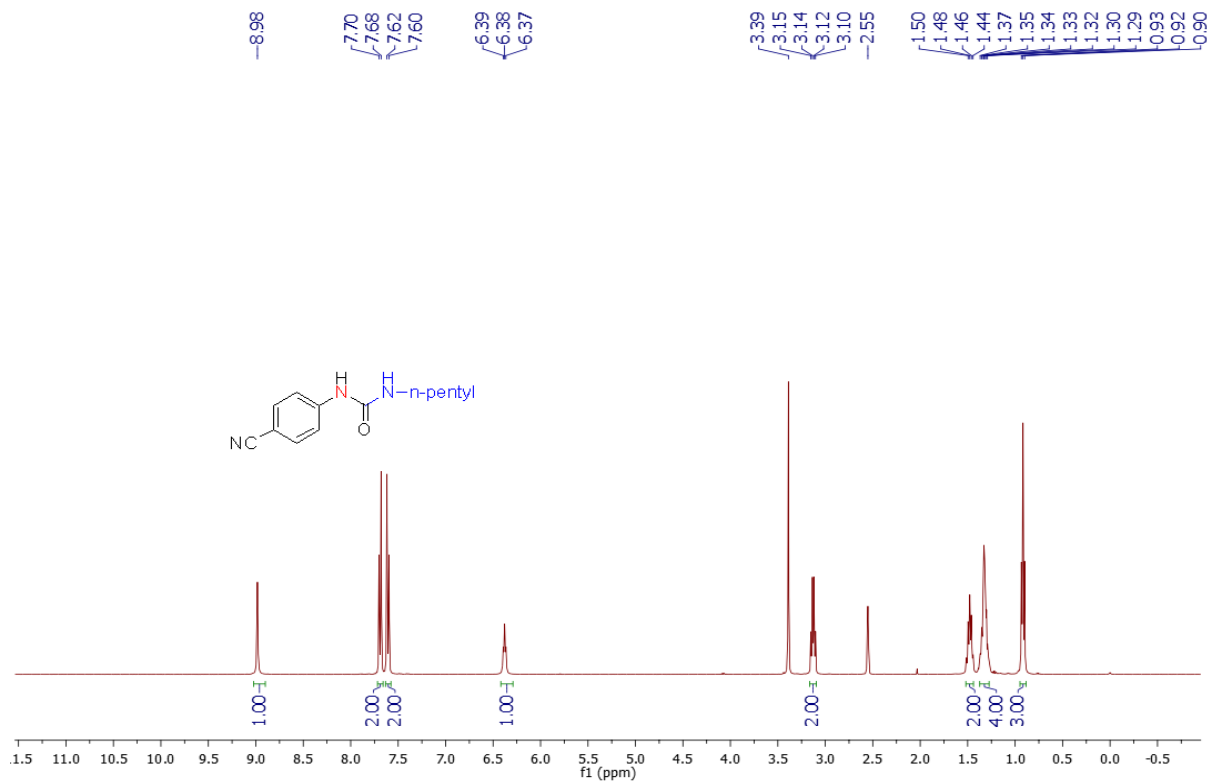

### <sup>13</sup>C-NMR of 1-(4-cyanophenyl)-3-pentylurea (3r)

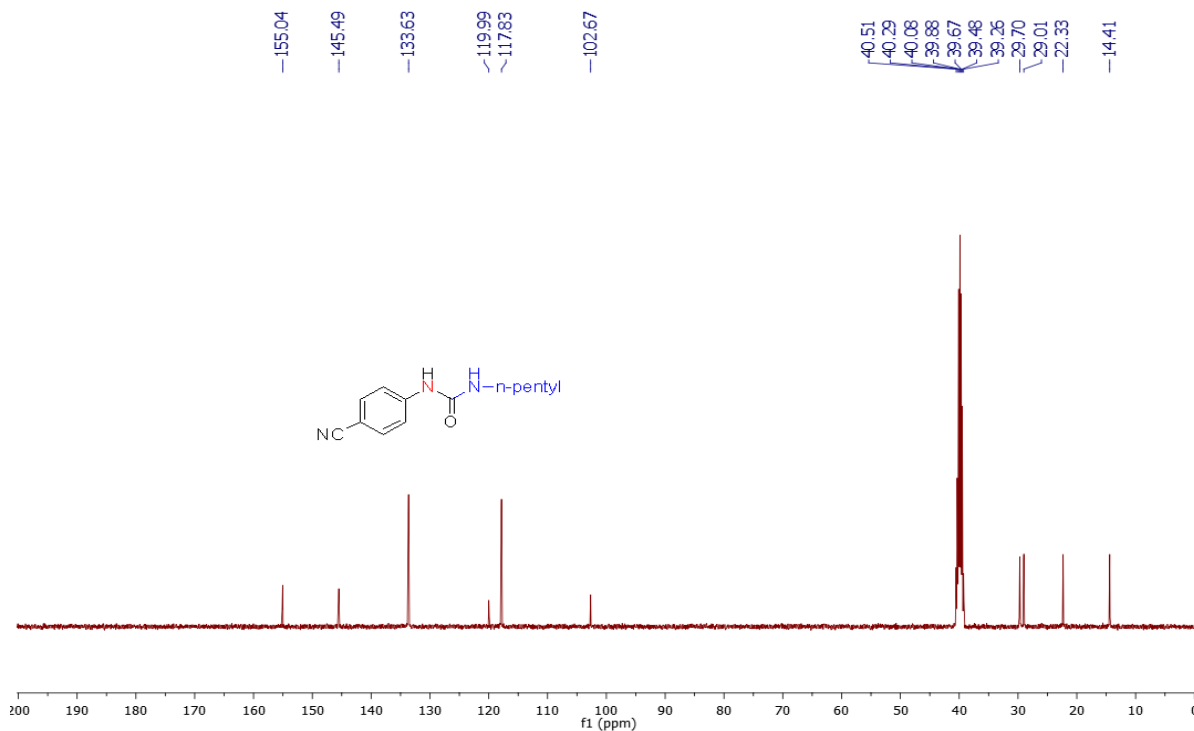



## DEPT of 1-(4-cyanophenyl)-3-pentylurea (3r)

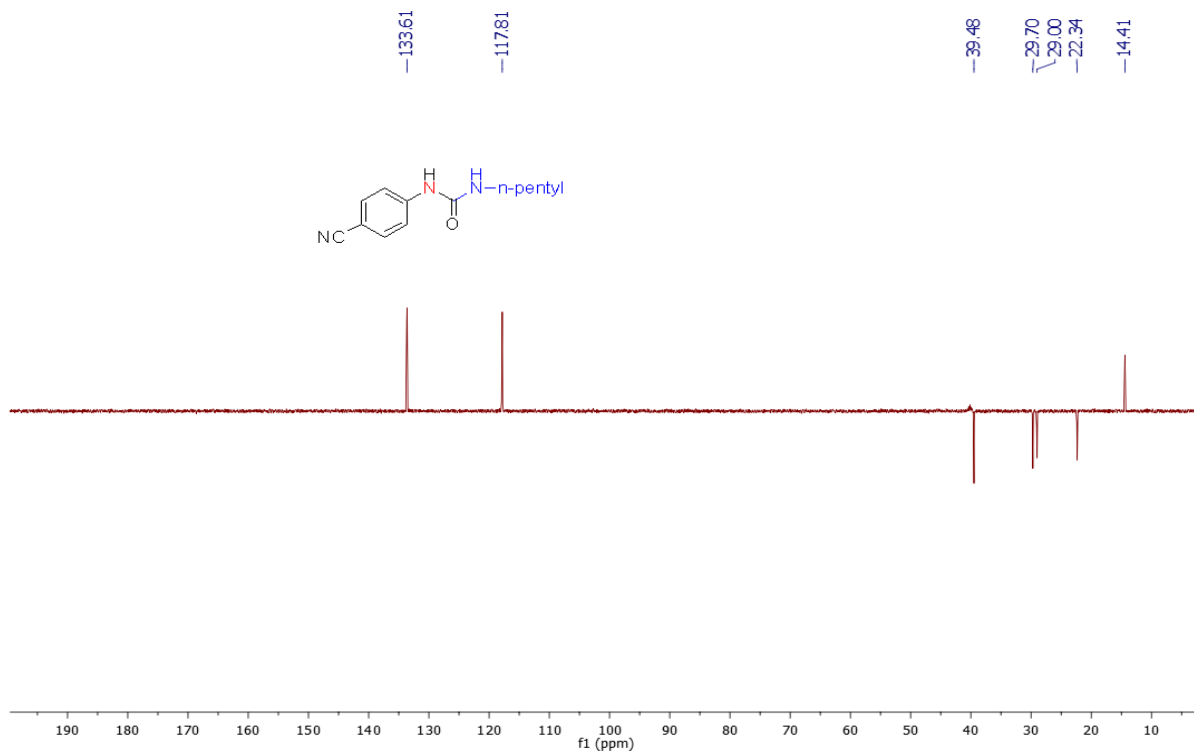

## HRMS of 1-(4-cyanophenyl)-3-pentylurea (3r)

### Elemental Composition Report

Page 1

#### Single Mass Analysis

Tolerance = 5.0 PPM / DBE: min = -1.5, max = 50.0

Element prediction: Off

Number of isotope peaks used for i-FIT = 3

Monoisotopic Mass, Even Electron Ions

14 formula(e) evaluated with 1 results within limits (up to 3 closest results for each mass)

Elements Used:

C: 0-13 H: 0-200 N: 0-4 O: 0-1

F-PA

281221\_34 8 (0.172) Cm (8)

QMI DIVISION, CSIR-IIIM JAMMU  
Xevo G2-XS QTOF YFC2015

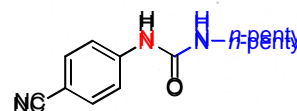

28-Dec-2021  
13:48:37  
1: TOF MS ES+  
1.38e+006

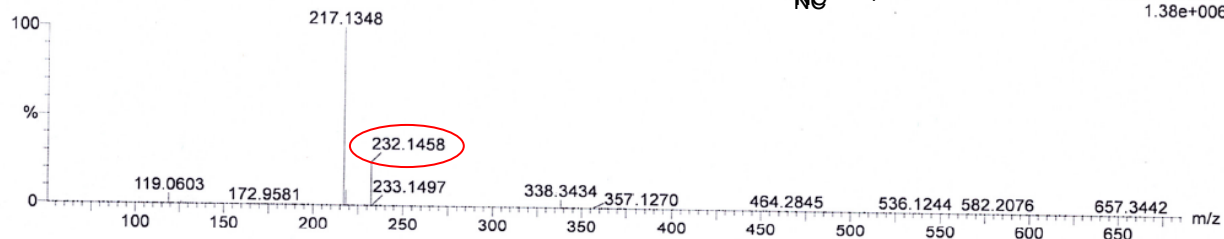

Minimum: -1.5  
Maximum: 2.0 5.0 50.0

| Mass     | Calc. Mass | mDa | PPM | DBE | i-FIT | Norm | Conf (%) | Formula      |
|----------|------------|-----|-----|-----|-------|------|----------|--------------|
| 232.1458 | 232.1450   | 0.8 | 3.4 | 6.5 | 41.8  | n/a  | n/a      | C13 H18 N3 O |

### <sup>1</sup>H-NMR of 1-hexadecyl-3-(4-methoxyphenyl)urea (3s)

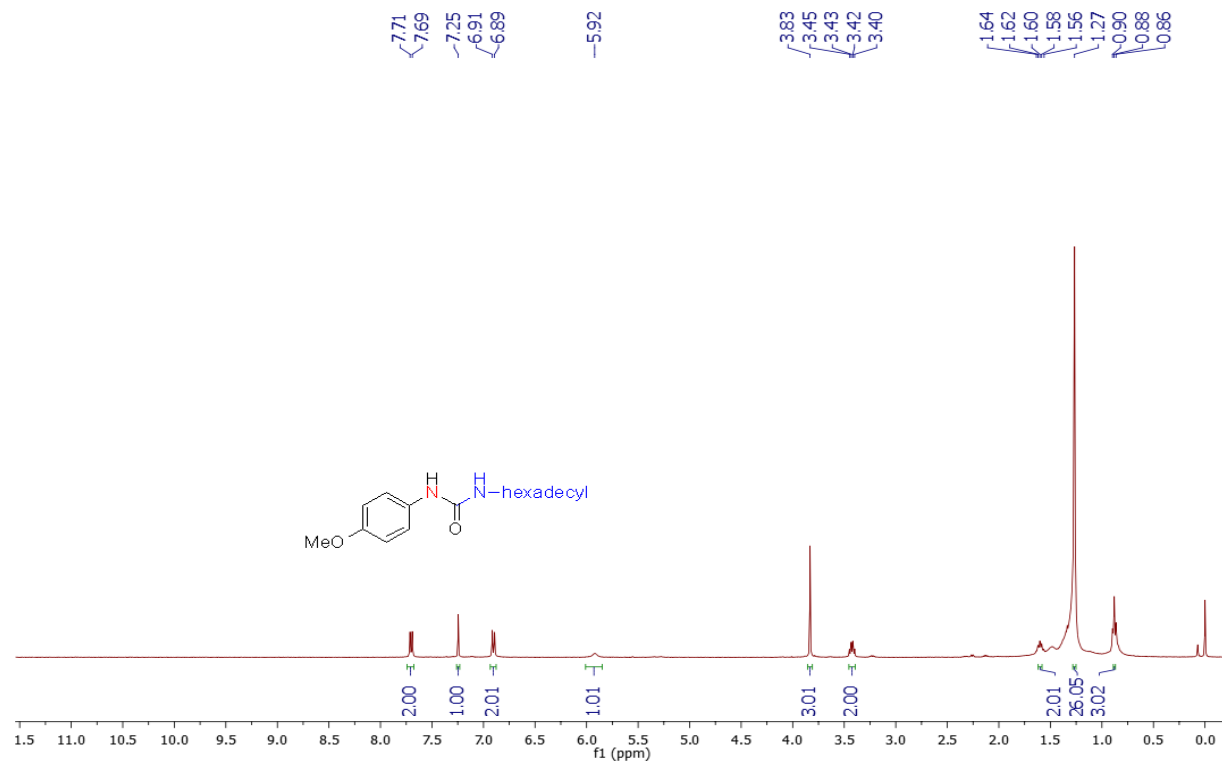

### <sup>13</sup>C-NMR of 1-hexadecyl-3-(4-methoxyphenyl)urea (3s)

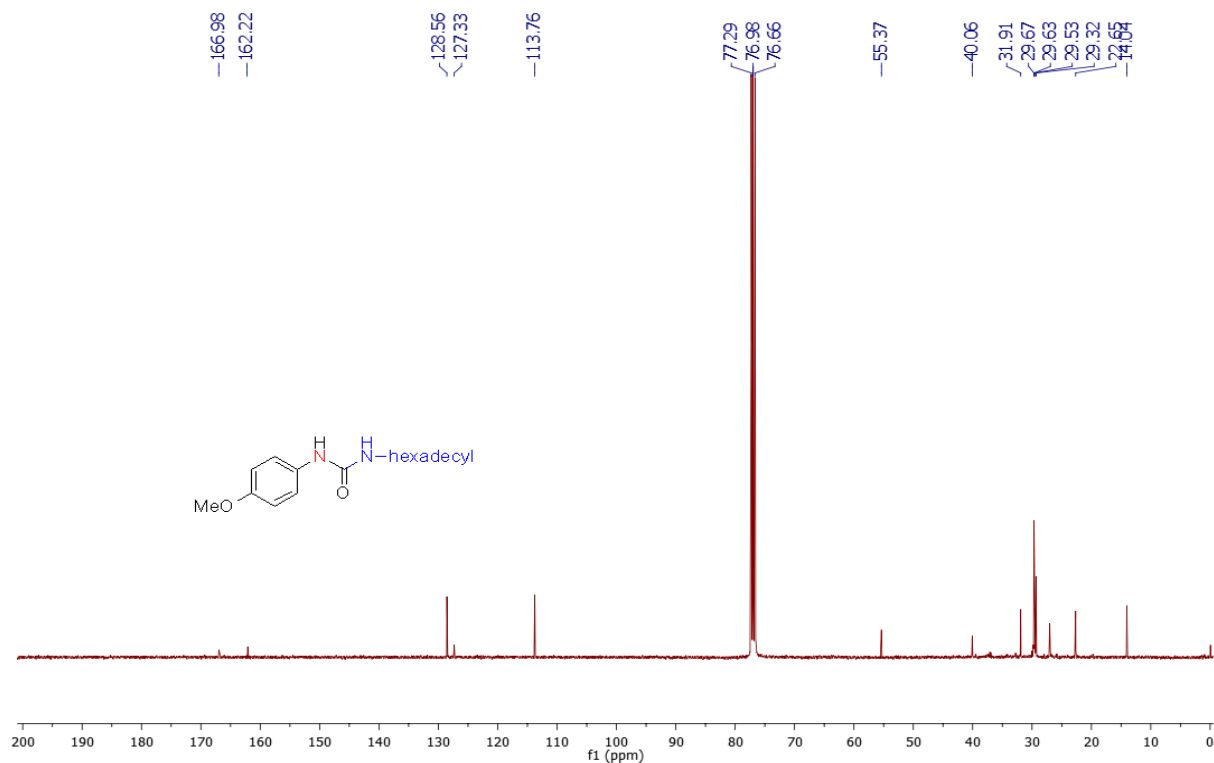

## DEPT of 1-hexadecyl-3-(4-methoxyphenyl)urea (3s)

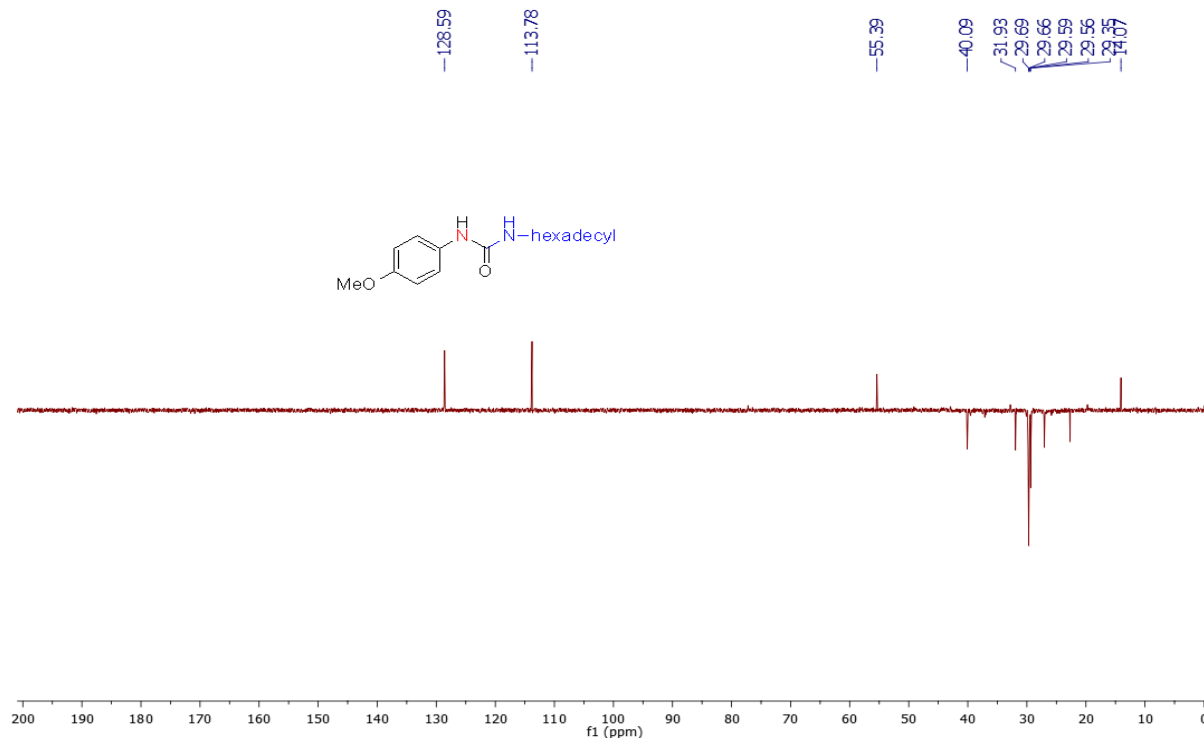

## HRMS of 1-hexadecyl-3-(4-methoxyphenyl)urea (3s)

### Elemental Composition Report

Page 1

#### Single Mass Analysis

Tolerance = 5.0 PPM / DBE: min = -1.5, max = 50.0

Element prediction: Off

Number of isotope peaks used for i-FIT = 3

Monoisotopic Mass, Even Electron Ions

10 formula(e) evaluated with 1 results within limits (up to 3 closest results for each mass)

Elements Used:

C: 0-24 H: 0-200 N: 0-2 O: 0-2

A1

281221\_26 17 (0.363) Cm (17)

QMI DIVISION, CSIR-IIIM JAMMU  
Xevo G2-XS QTOF YFC2015

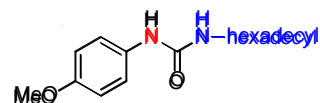

28-Dec-2021  
13:28:05  
1: TOF MS ES+  
5.27e+005

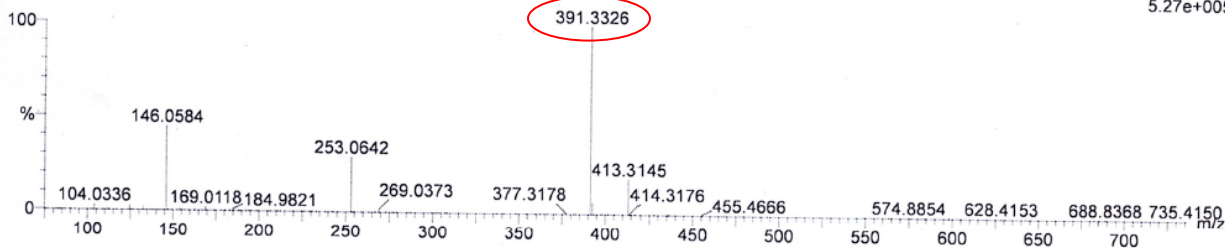

Minimum: -1.5  
Maximum: 2.0 5.0 50.0

| Mass     | Calc. Mass | mDa | PPM | DBE | i-FIT | Norm | Conf(%) | Formula       |
|----------|------------|-----|-----|-----|-------|------|---------|---------------|
| 391.3326 | 391.3325   | 0.1 | 0.3 | 4.5 | 41.1  | n/a  | n/a     | C24 H43 N2 O2 |

### <sup>1</sup>H-NMR of 1-(4-cyanophenyl)-3-hexadecylurea (3t)

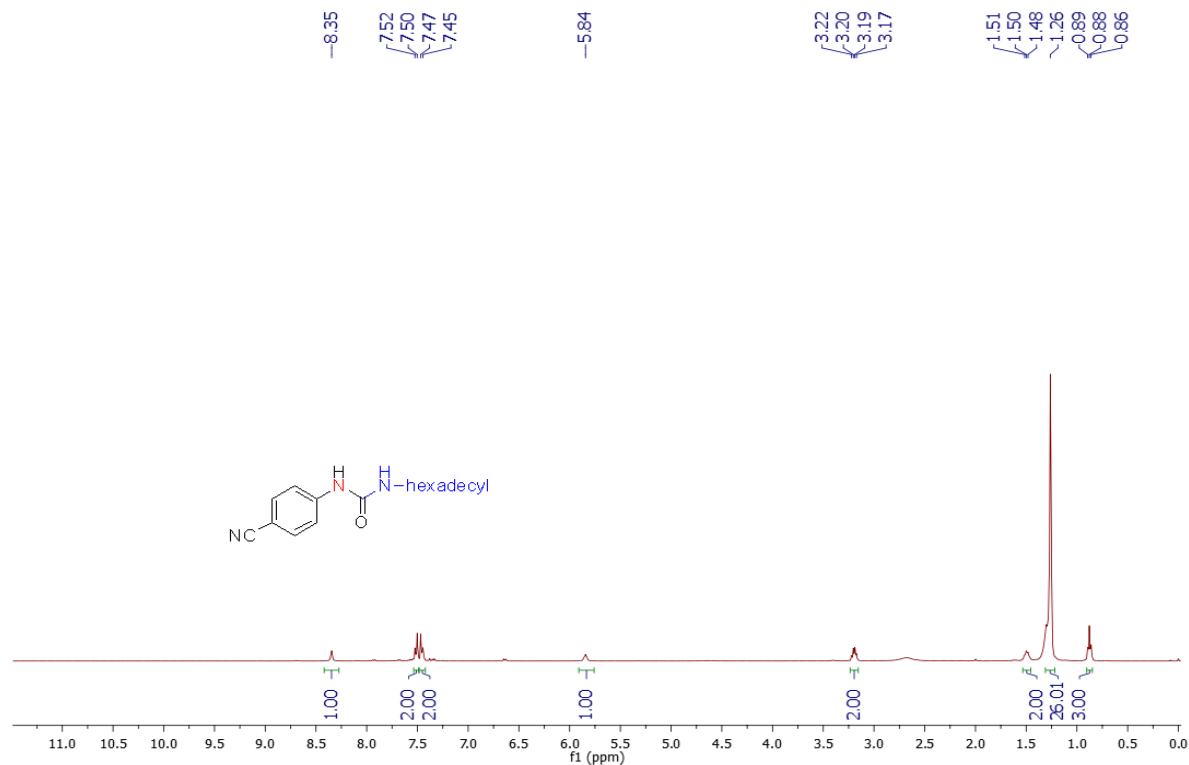

### <sup>13</sup>C-NMR of 1-(4-cyanophenyl)-3-hexadecylurea (3t)

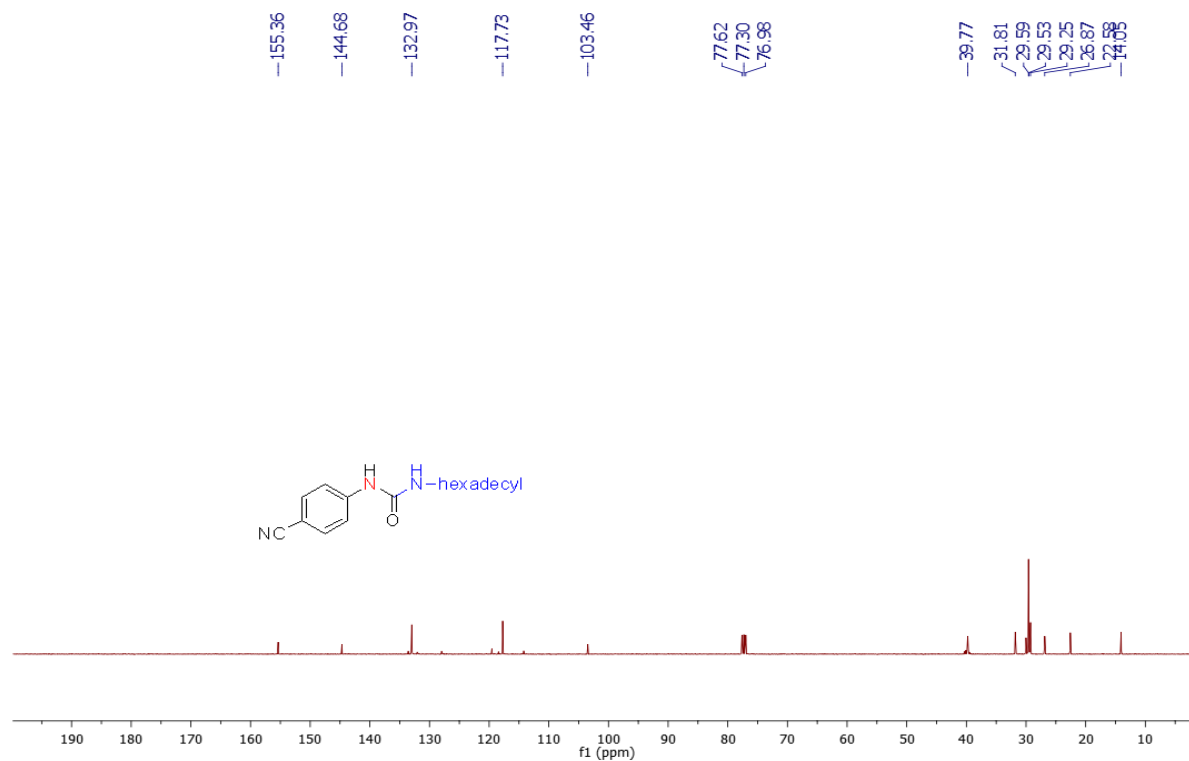

# DEPT of 1-(4-cyanophenyl)-3-hexadecylurea (3t)

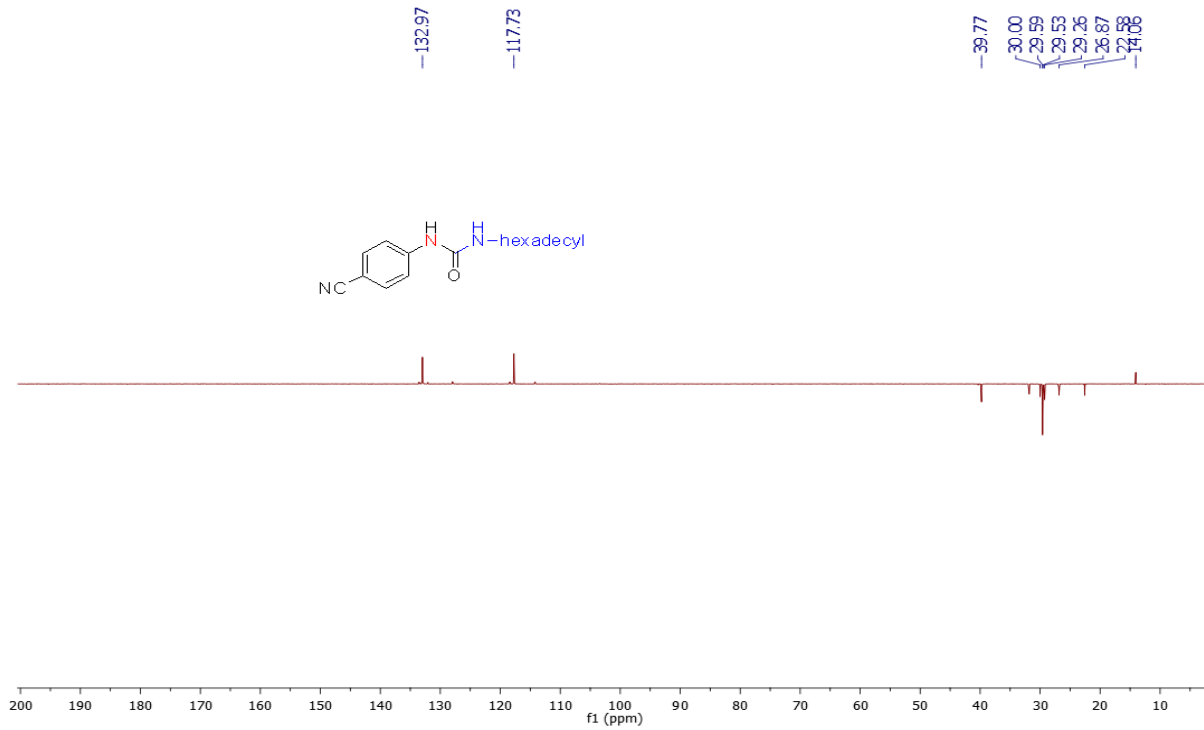

## HRMS (ESI-TOF) of compound (3t)

### Elemental Composition Report

Page 1

#### Single Mass Analysis

Tolerance = 3.0 PPM / DBE: min = -1.5, max = 50.0

Element prediction: Off

Number of isotope peaks used for i-FIT = 3

Monoisotopic Mass, Even Electron Ions

9 formula(e) evaluated with 1 results within limits (up to 3 closest results for each mass)

Elements Used:

C: 0-24 H: 0-200 N: 0-3 O: 0-1

RR-105

291021\_02 15 (0.310) Cm (15:16)

QMI DIVISION, CSIR-IIIM JAMMU  
Xevo G2-XS QTOF YFC2015

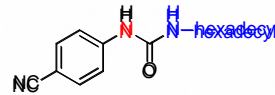

29-Oct-2021

12:01:23

1: TOF MS ES+

1.57e+006

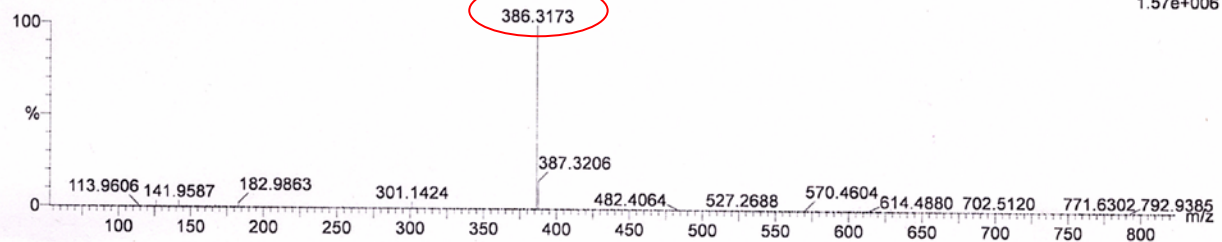

Minimum:

Maximum: 2.0 3.0 -1.5 50.0

| Mass     | Calc. Mass | mDa | PPM | DBE | i-FIT | Norm | Conf (%) | Formula                                          |
|----------|------------|-----|-----|-----|-------|------|----------|--------------------------------------------------|
| 386.3173 | 386.3171   | 0.2 | 0.5 | 6.5 | 37.1  | n/a  | n/a      | C <sub>24</sub> H <sub>40</sub> N <sub>3</sub> O |

### <sup>1</sup>H-NMR of 1-(tert-butyl)-3-(4-methoxyphenyl)urea (3u)

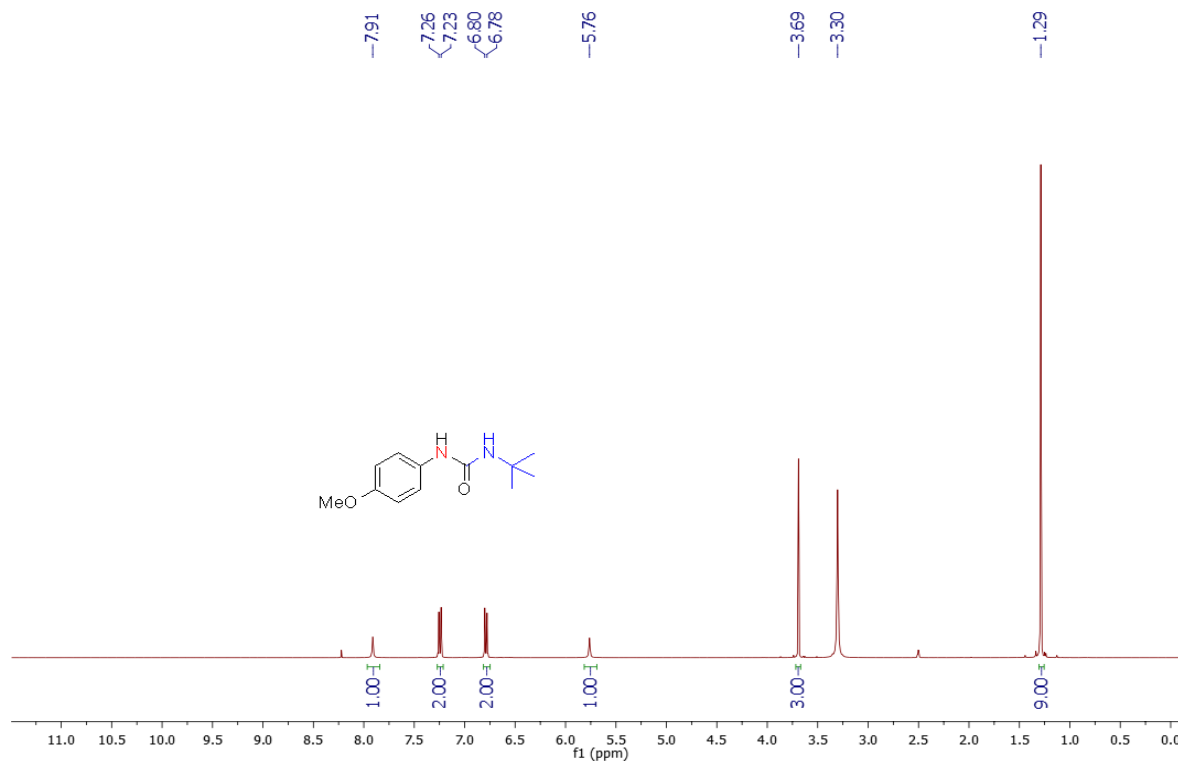

### <sup>13</sup>C-NMR of 1-(tert-butyl)-3-(4-methoxyphenyl)urea (3u)

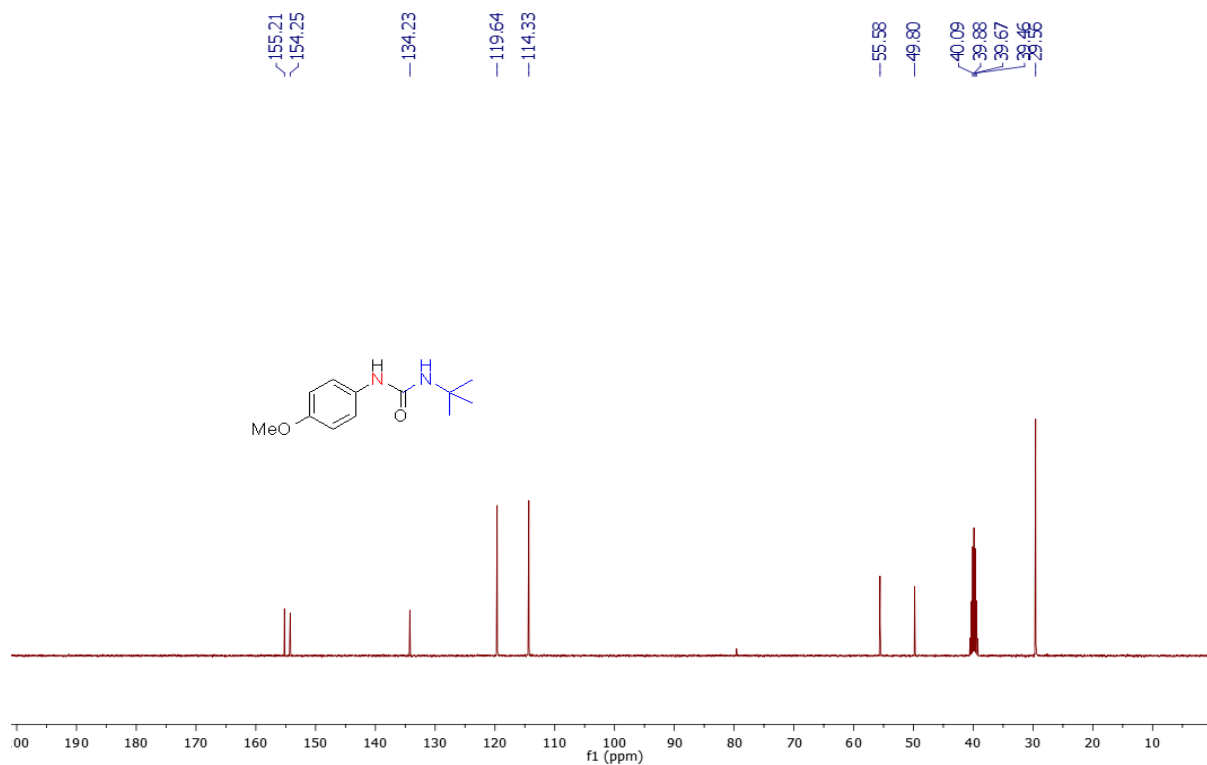

## DEPT of 1-(tert-butyl)-3-(4-methoxyphenyl)urea (3u)

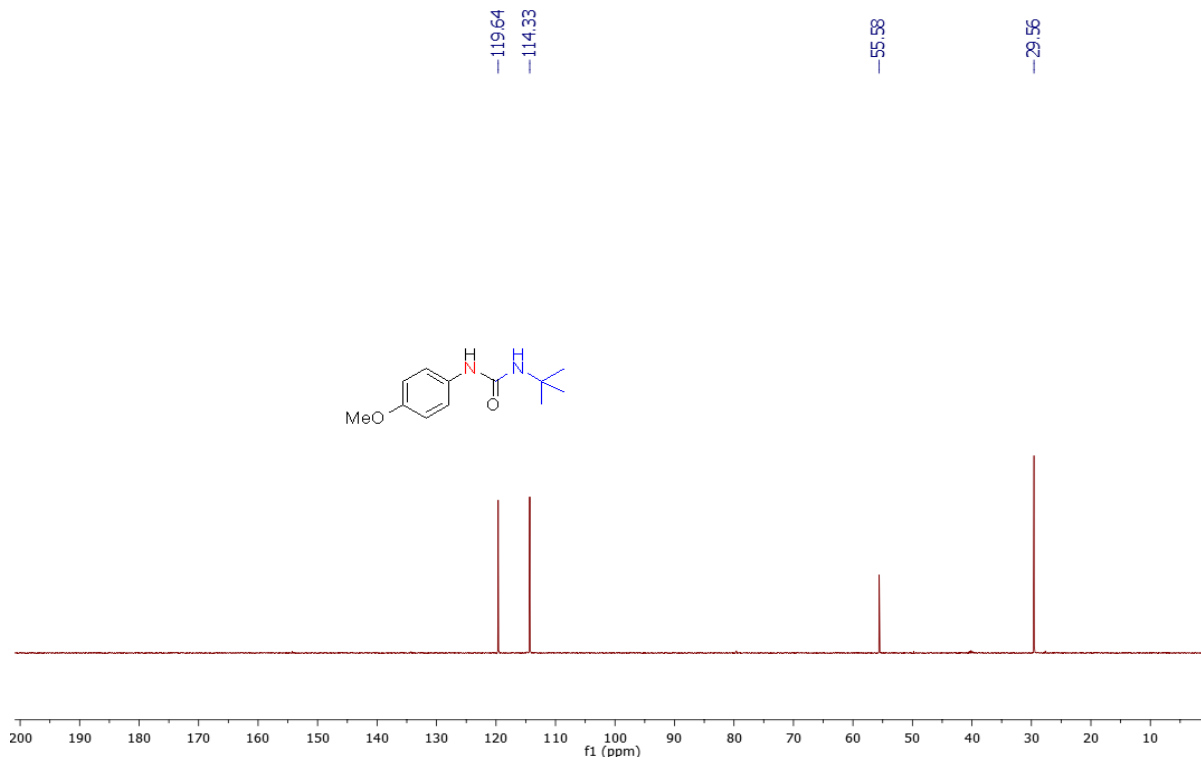

## HRMS (ESI-TOF) of compound (3u)

### Elemental Composition Report

Page 1

### Single Mass Analysis

Tolerance = 3.0 PPM / DBE: min = -1.5, max = 50.0

Element prediction: Off

Number of isotope peaks used for i-FIT = 3

Monoisotopic Mass, Even Electron Ions

10 formula(e) evaluated with 1 results within limits (up to 3 closest results for each mass)

Elements Used:

C: 0-12 H: 0-200 N: 0-2 O: 0-2

RR-103

210921\_22 33 (0.674) Cm (33:34)

QMI DIVISION, CSIR-IIIM JAMMU  
Xevo G2-XS QTOF YFC2015

21-Sep-2021  
13:02:44  
1: TOF MS ES+  
1.81e+006

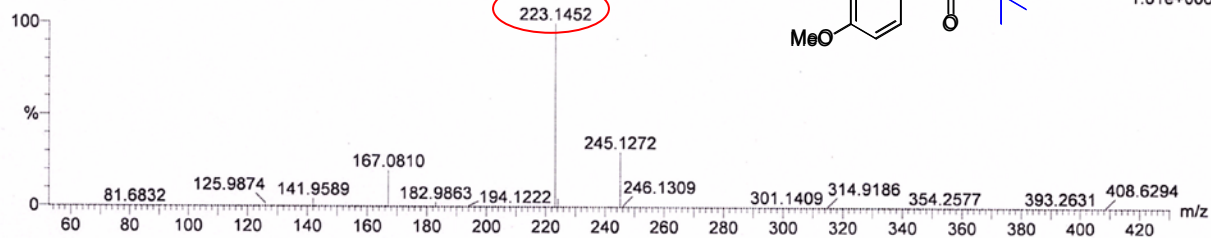

Minimum: -1.5  
Maximum: 2.0 3.0 50.0

| Mass     | Calc. Mass | mDa | PPM | DBE | i-FIT | Norm | Conf (%) | Formula       |
|----------|------------|-----|-----|-----|-------|------|----------|---------------|
| 223.1452 | 223.1447   | 0.5 | 2.2 | 4.5 | 41.8  | n/a  | n/a      | C12 H19 N2 O2 |

### <sup>1</sup>H-NMR of 1-(tert-butyl)-3-(4-cyanophenyl)urea (3v)

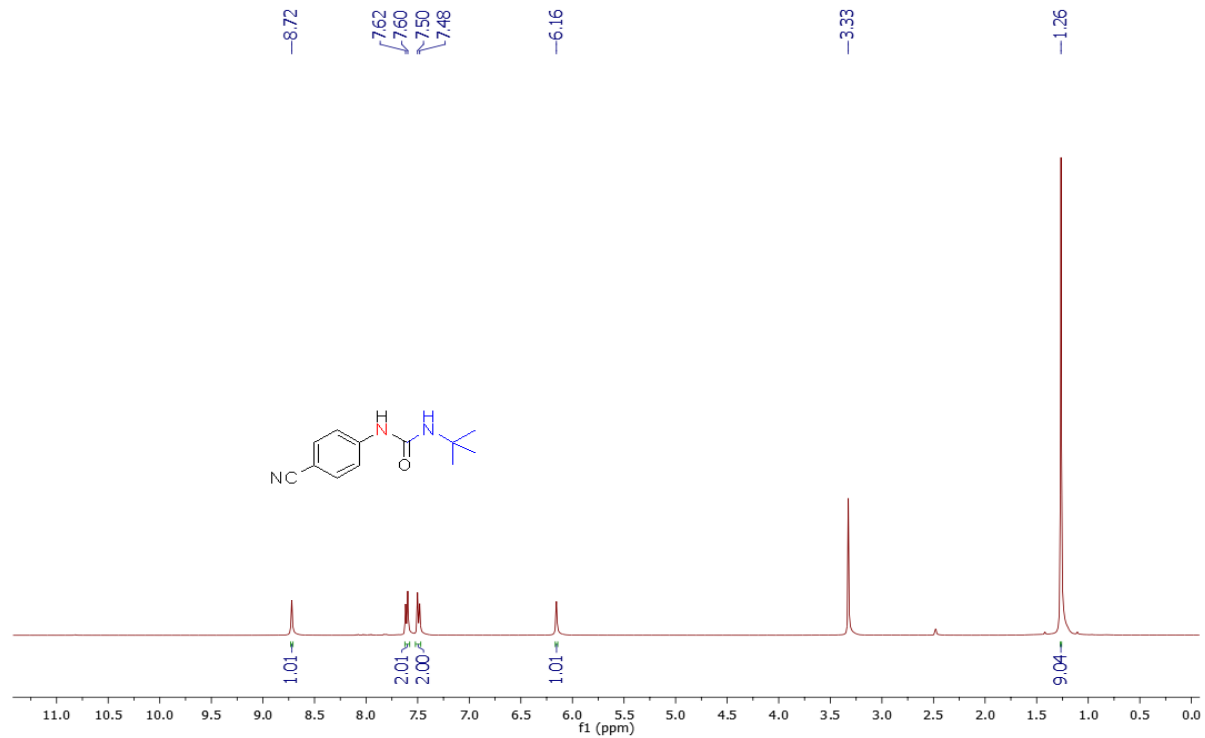

### <sup>13</sup>C-NMR of 1-(tert-butyl)-3-(4-cyanophenyl)urea (3v)

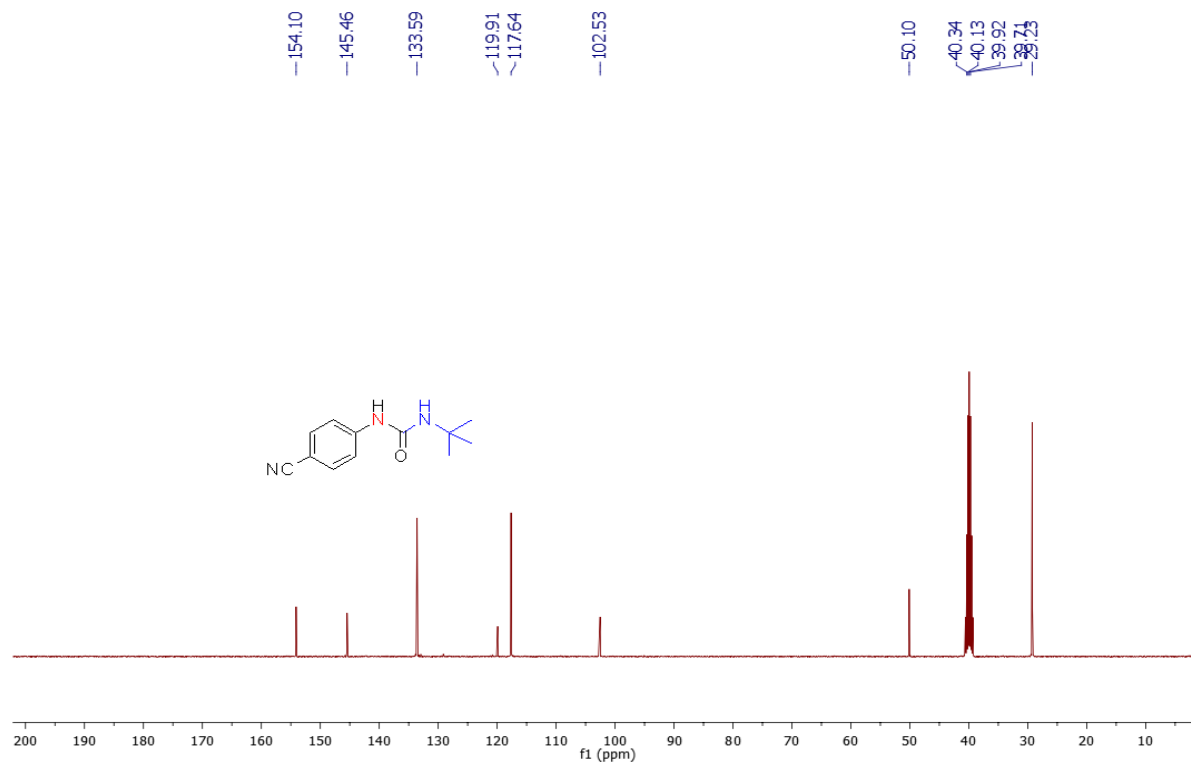



## DEPT of 1-(tert-butyl)-3-(4-cyanophenyl)urea (3v)

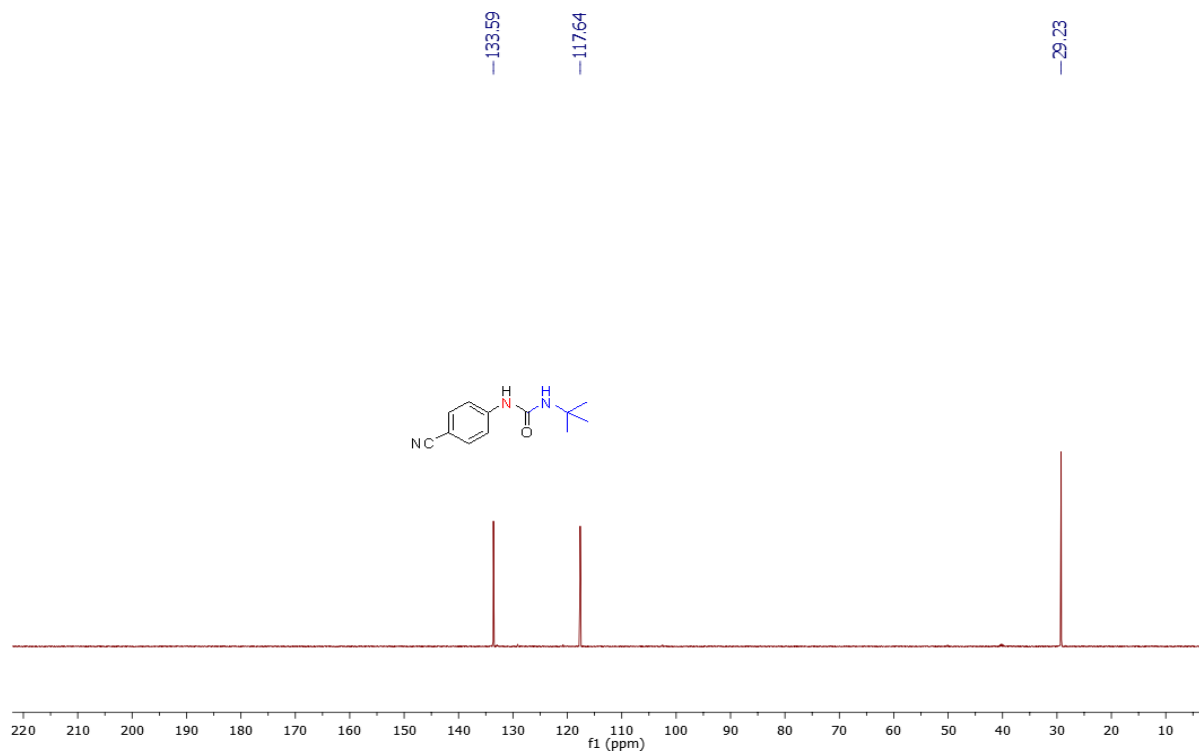

## HRMS (ESI-TOF) of compound (3v)

### Elemental Composition Report

Page 1

#### Single Mass Analysis

Tolerance = 3.0 PPM / DBE: min = -1.5, max = 50.0

Element prediction: Off

Number of isotope peaks used for i-FIT = 3

Monoisotopic Mass, Even Electron Ions

9 formula(e) evaluated with 1 results within limits (up to 3 closest results for each mass)

Elements Used:

C: 0-12 H: 0-200 N: 0-3 O: 0-1

Z: 9

QMI DIVISION, CSIR-IIIM JAMMU  
Xevo G2-XS QTOF YFC2015

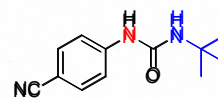

22-Sep-2021  
13:04:55  
1: TOF MS ES+  
1.66e+006

220921\_26 11 (0.242) Cm (11:12)

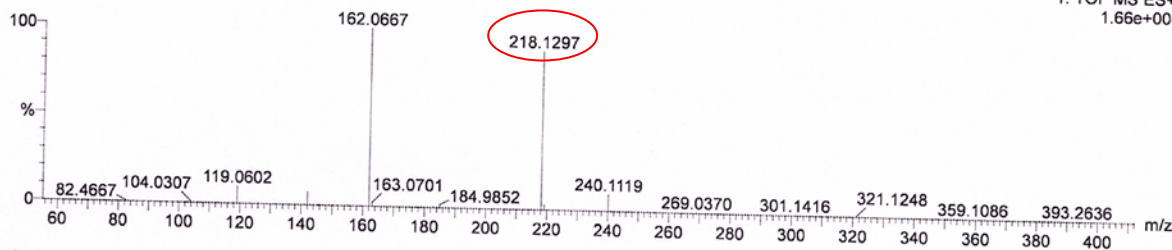

Minimum: -1.5  
Maximum: 2.0 3.0 50.0

| Mass     | Calc. Mass | mDa | PPM | DBE | i-FIT | Norm | Conf (%) | Formula      |
|----------|------------|-----|-----|-----|-------|------|----------|--------------|
| 218.1297 | 218.1293   | 0.4 | 1.8 | 6.5 | 38.1  | n/a  | n/a      | C12 H16 N3 O |

### <sup>1</sup>H-NMR of 1-cyclobutyl-3-(4-methoxyphenyl)urea (3w)

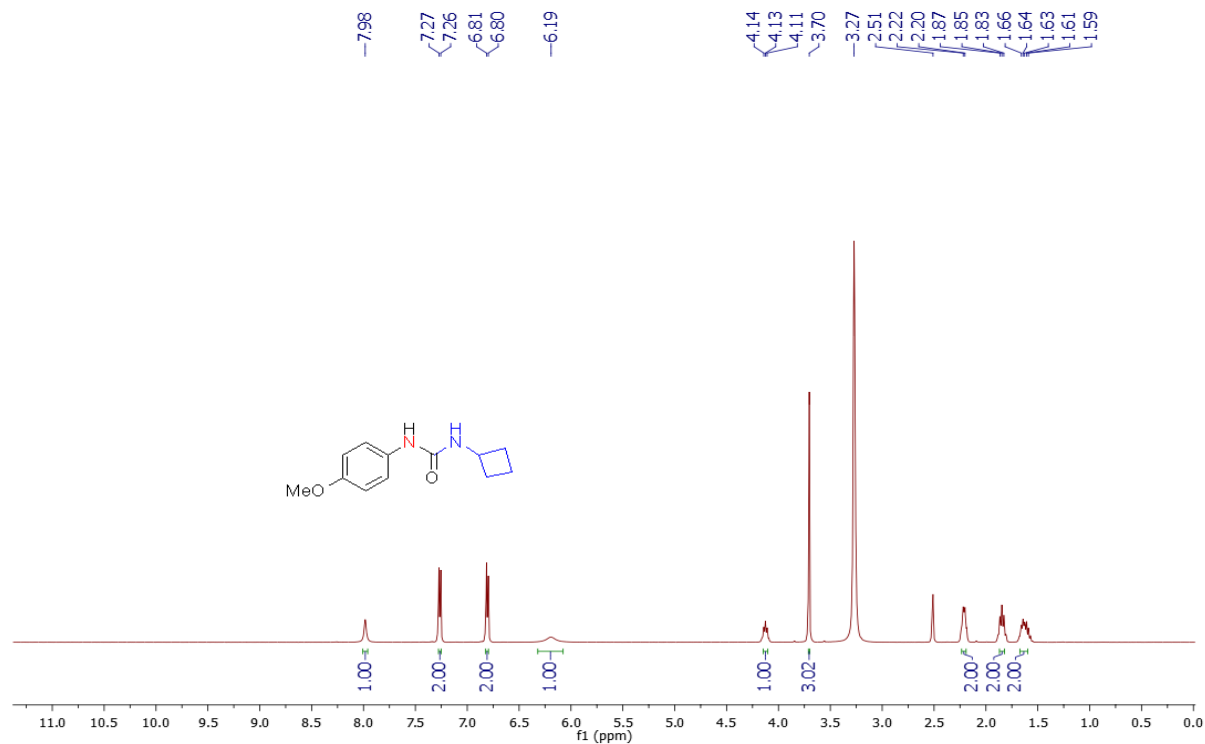

### <sup>13</sup>C-NMR of 1-cyclobutyl-3-(4-methoxyphenyl)urea (3w)

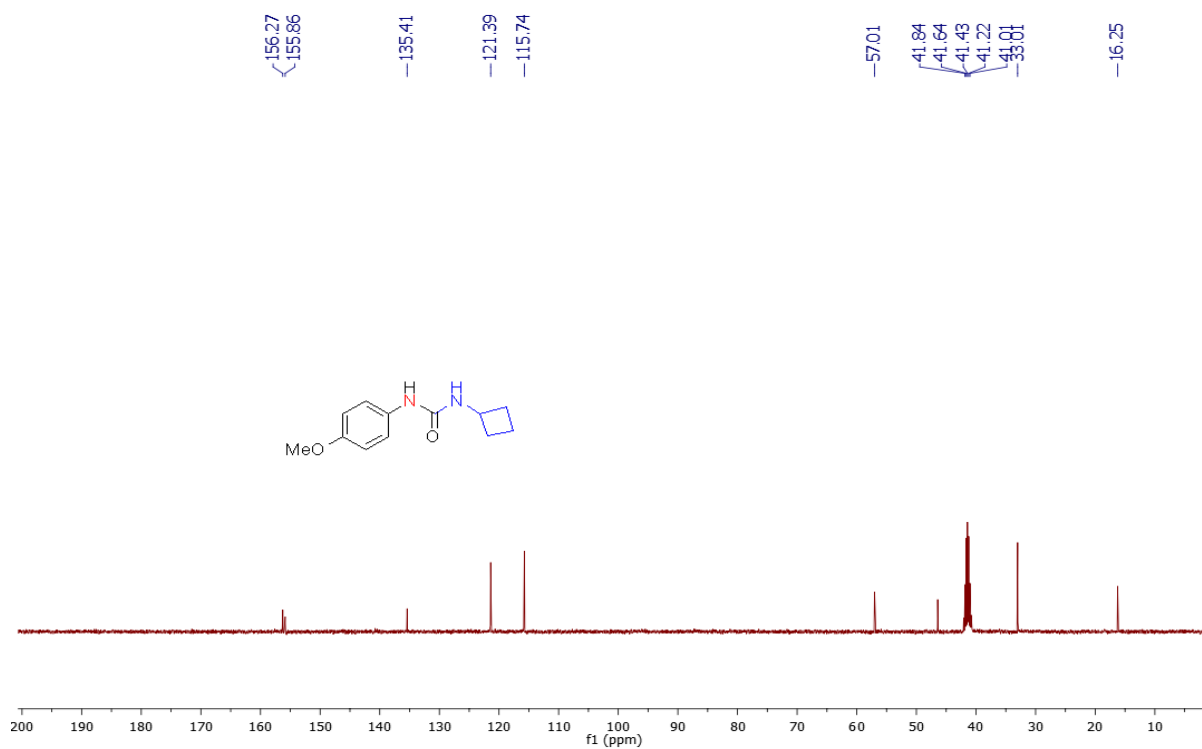

# DEPT of 1-cyclobutyl-3-(4-methoxyphenyl)urea (3w)

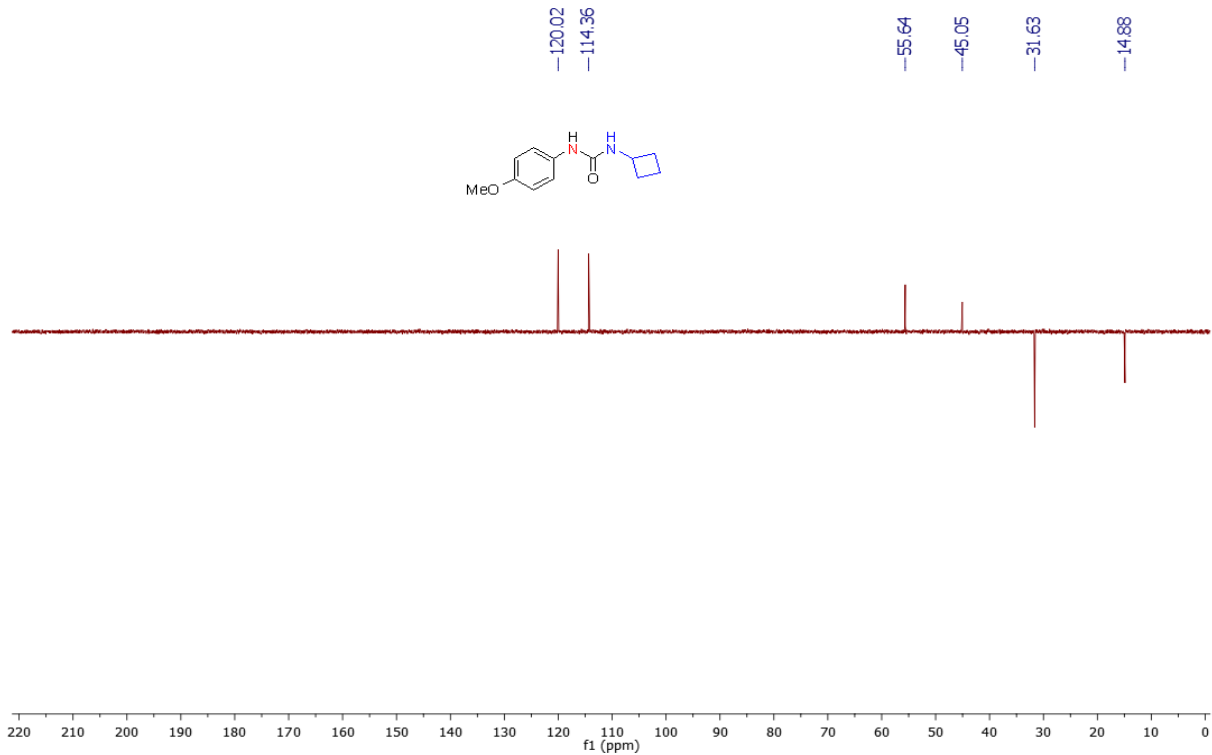

## HRMS (ESI-TOF) of compound (3w)

### Elemental Composition Report

Page 1

#### Single Mass Analysis

Tolerance = 3.0 PPM / DBE: min = -1.5, max = 50.0

Element prediction: Off

Number of isotope peaks used for i-FIT = 3

Monoisotopic Mass, Even Electron Ions

149 formula(e) evaluated with 1 results within limits (up to 3 closest results for each mass)

Elements Used:

C: 0-30 H: 0-200 N: 0-2 O: 0-9 Na: 0-1

F-148

200921\_11 23 (0.465) Cm (23:24)

QMI DIVISION, CSIR-IIIM JAMMU  
Xevo G2-XS QTOF YFC2015

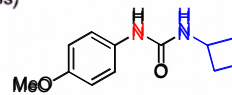

20-Sep-2021  
12:24:50  
1: TOF MS ES+  
2.32e+006

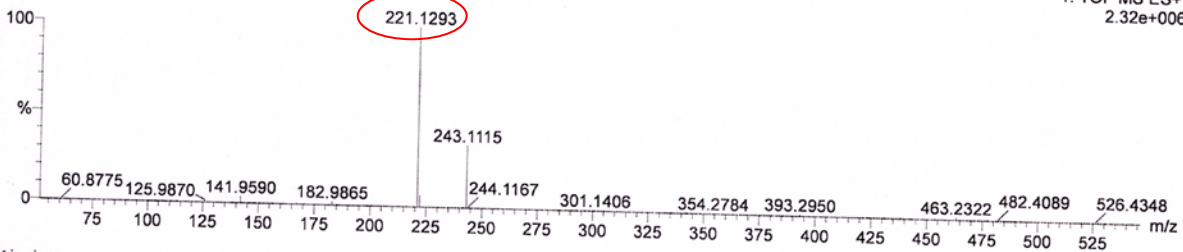

Minimum:

Maximum: 2.0 3.0 -1.5 50.0

| Mass     | Calc. Mass | mDa | PPM | DBE | i-FIT | Norm | Conf (%) | Formula       |
|----------|------------|-----|-----|-----|-------|------|----------|---------------|
| 221.1293 | 221.1290   | 0.3 | 1.4 | 5.5 | 39.7  | n/a  | n/a      | C12 H17 N2 O2 |

### <sup>1</sup>H-NMR of 1-(4-cyanophenyl)-3-cyclobutylurea (3x)

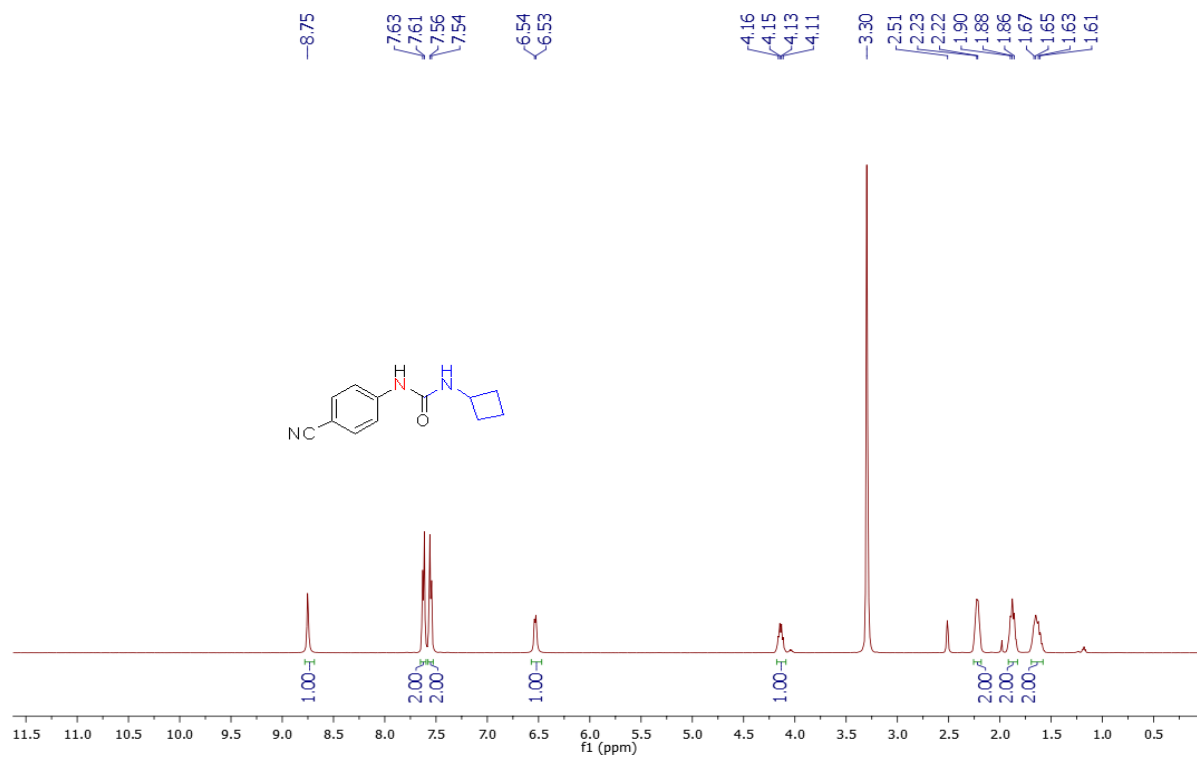

### <sup>13</sup>C-NMR of 1-(4-cyanophenyl)-3-cyclobutylurea (3x)

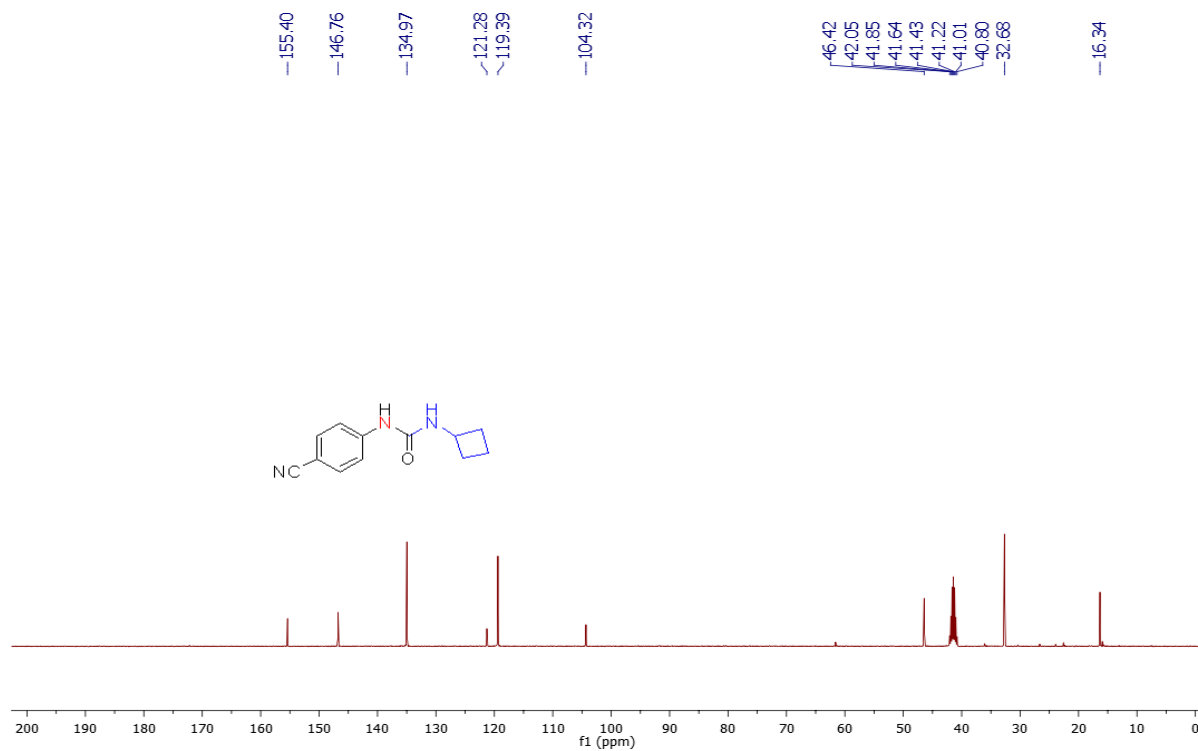

## DEPT of 1-(4-cyanophenyl)-3-cyclobutylurea (3x)

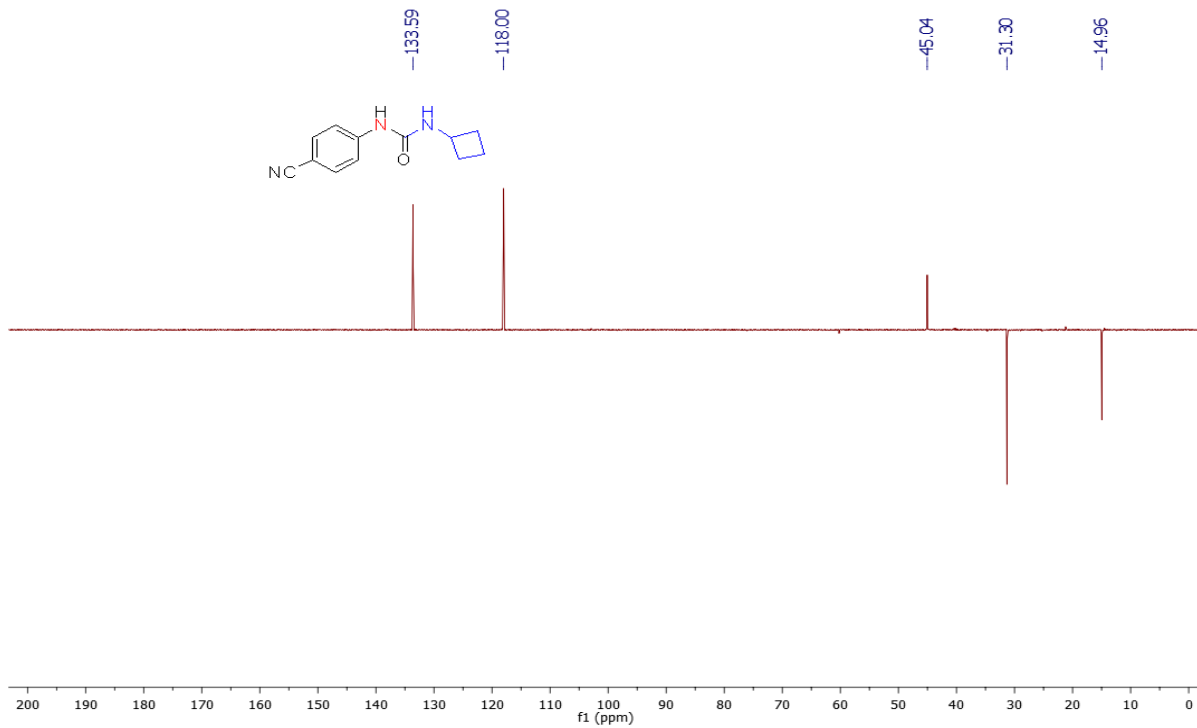

## HRMS (ESI-TOF) of compound (3x)

### Elemental Composition Report

Page 1

#### Single Mass Analysis

Tolerance = 3.0 PPM / DBE: min = -1.5, max = 50.0

Element prediction: Off

Number of isotope peaks used for i-FIT = 3

Monoisotopic Mass, Even Electron Ions

9 formula(e) evaluated with 1 results within limits (up to 3 closest results for each mass)

Elements Used:

C: 0-12 H: 0-200 N: 0-3 O: 0-1

F-165

200921\_04 14 (0.293) Cm (14:15)

QMI DIVISION, CSIR-IIIM JAMMU  
Xevo G2-XS QTOF YFC2015

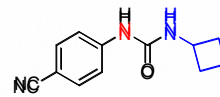

20-Sep-2021  
12:06:11  
1: TOF MS ES+  
2.49e+006

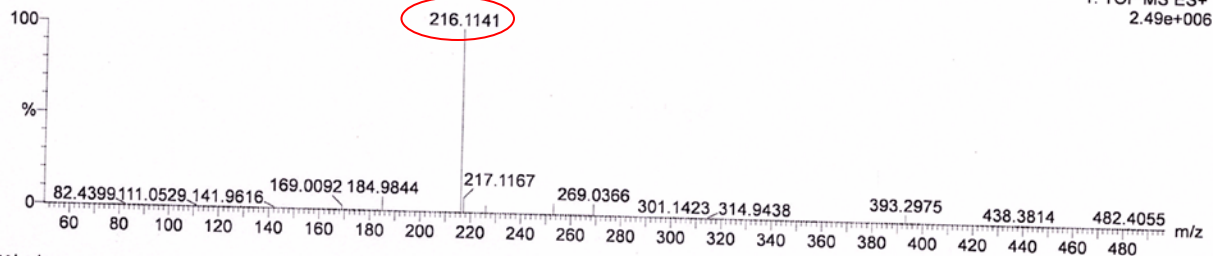

Minimum:

Maximum: 2.0 3.0 -1.5 50.0

| Mass     | Calc. Mass | mDa | PPM | DBE | i-FIT | Norm | Conf (%) | Formula      |
|----------|------------|-----|-----|-----|-------|------|----------|--------------|
| 216.1141 | 216.1137   | 0.4 | 1.9 | 7.5 | 44.2  | n/a  | n/a      | C12 H14 N3 O |

### <sup>1</sup>H-NMR of 1-cyclopropyl-3-(4-methoxyphenyl)urea (3y)

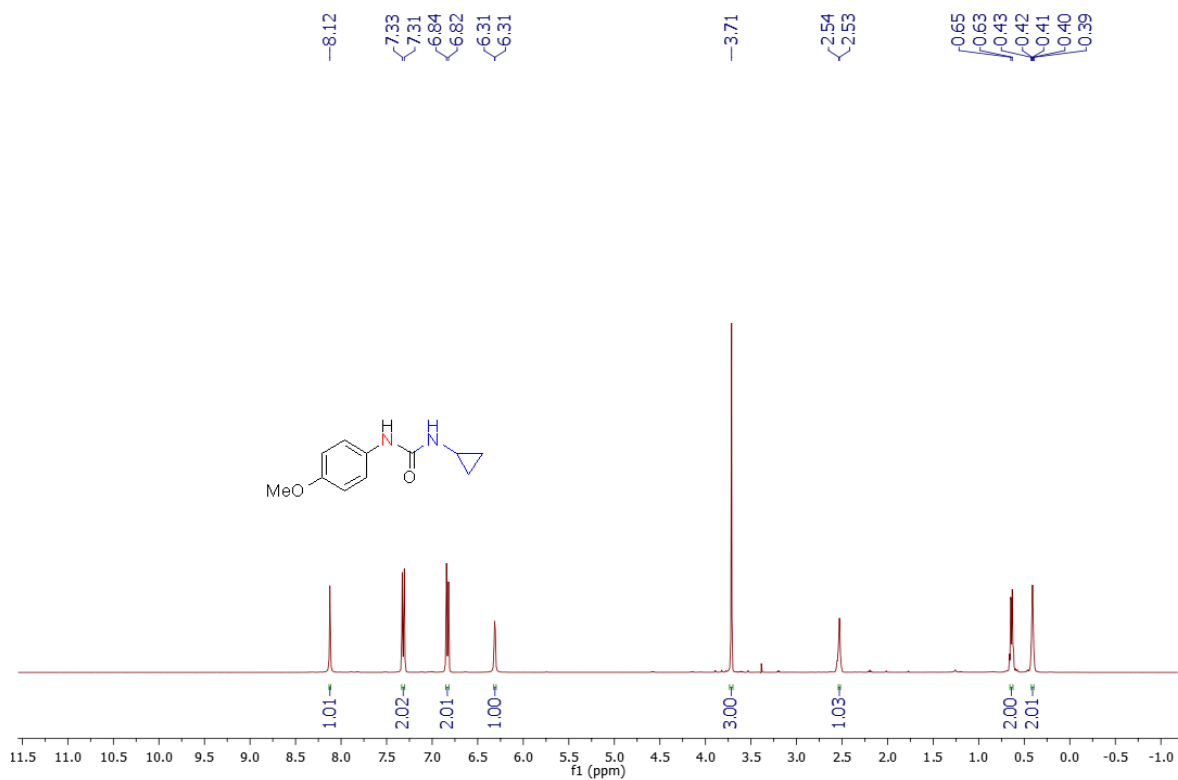

### <sup>13</sup>C-NMR of 1-cyclopropyl-3-(4-methoxyphenyl)urea (3y)

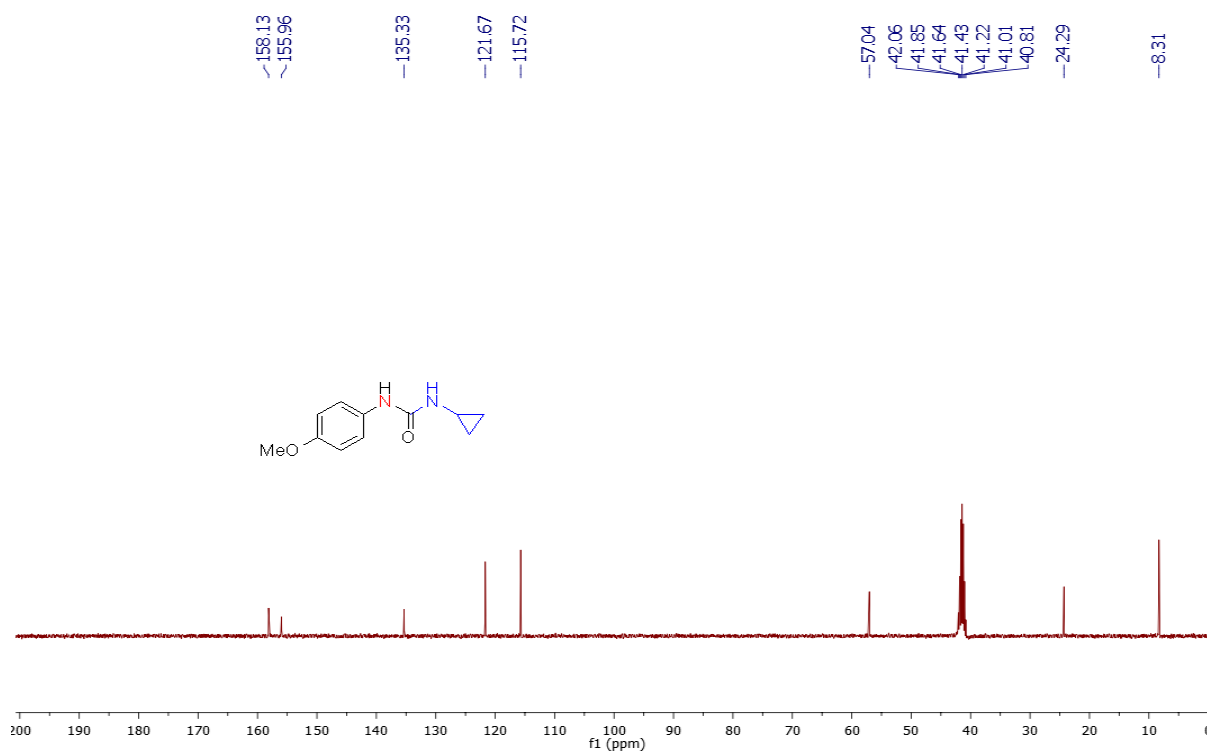

## DEPT of 1-cyclopropyl-3-(4-methoxyphenyl)urea (3y)

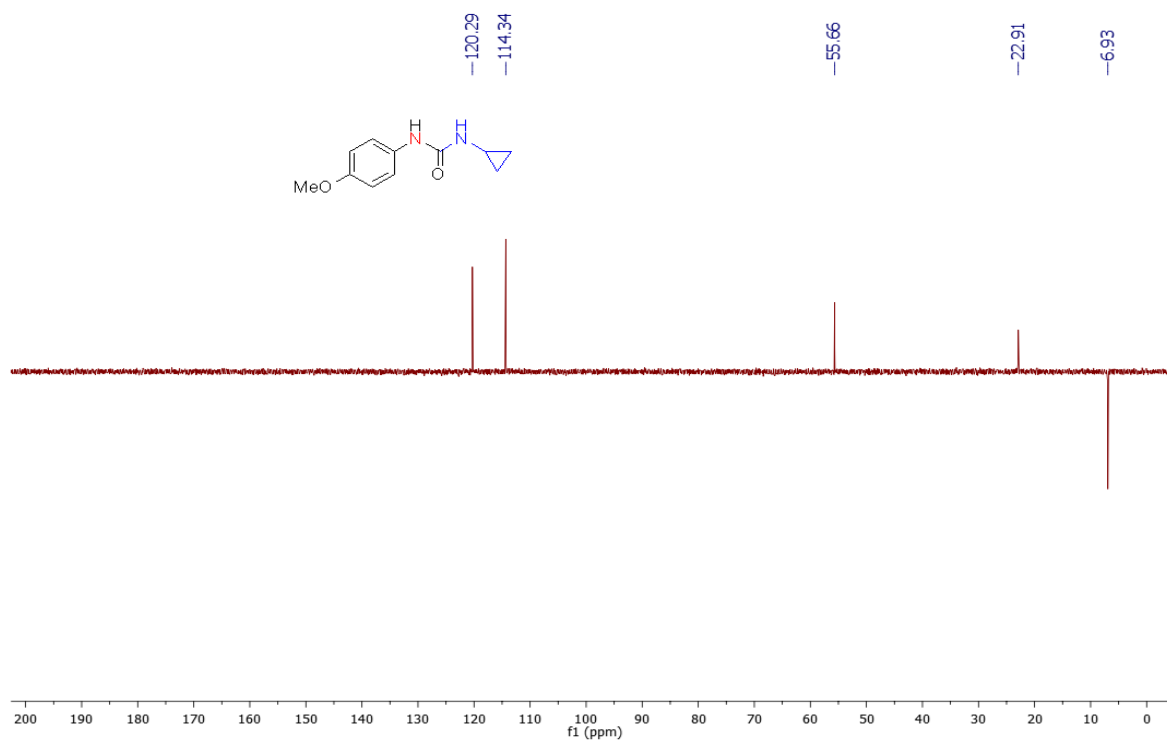

## HRMS (ESI-TOF) of compound (3y)

### Elemental Composition Report

Page 1

### Single Mass Analysis

Tolerance = 5.0 PPM / DBE: min = -1.5, max = 50.0

Element prediction: Off

Number of isotope peaks used for i-FIT = 3

Monoisotopic Mass, Even Electron Ions

10 formula(e) evaluated with 1 results within limits (up to 3 closest results for each mass)

Elements Used:

C: 0-11 H: 0-200 N: 0-2 O: 0-2

Z: 5

220921\_25 11 (0.242) Cm (11:12)

QMI DIVISION, CSIR-IIIM JAMMU  
Xevo G2-XS QTOF YFC2015

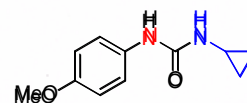

22-Sep-2021  
13:02:21  
1: TOF MS ES+  
1.39e+006

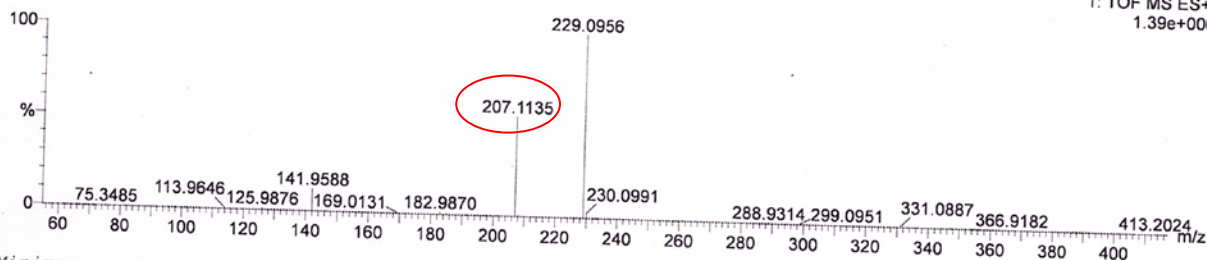

Minimum:

Maximum:

2.0 5.0 -1.5  
50.0

| Mass     | Calc. Mass | mDa | PPM | DBE | i-FIT | Norm | Conf (%) | Formula       |
|----------|------------|-----|-----|-----|-------|------|----------|---------------|
| 207.1135 | 207.1134   | 0.1 | 0.5 | 5.5 | 43.7  | n/a  | n/a      | C11 H15 N2 O2 |

### <sup>1</sup>H-NMR of 1-(4-cyanophenyl)-3-cyclopropylurea (3z)

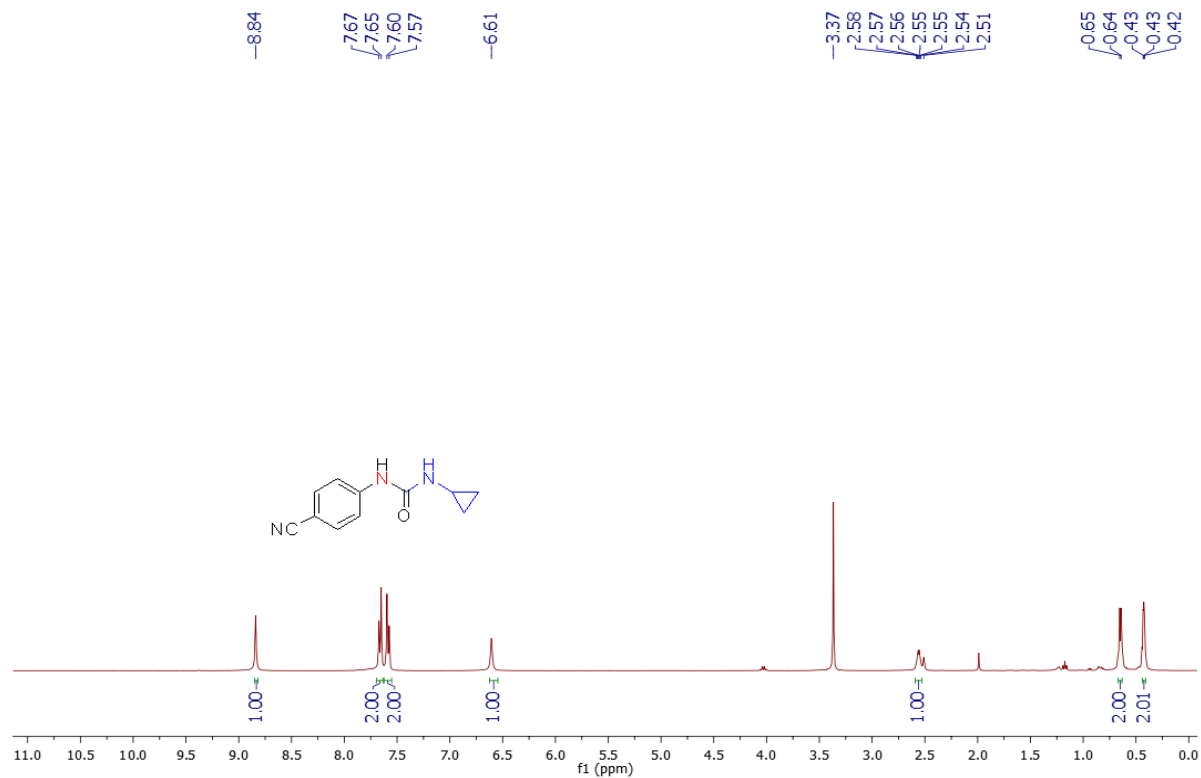

### <sup>13</sup>C-NMR of 1-(4-cyanophenyl)-3-cyclopropylurea (3z)

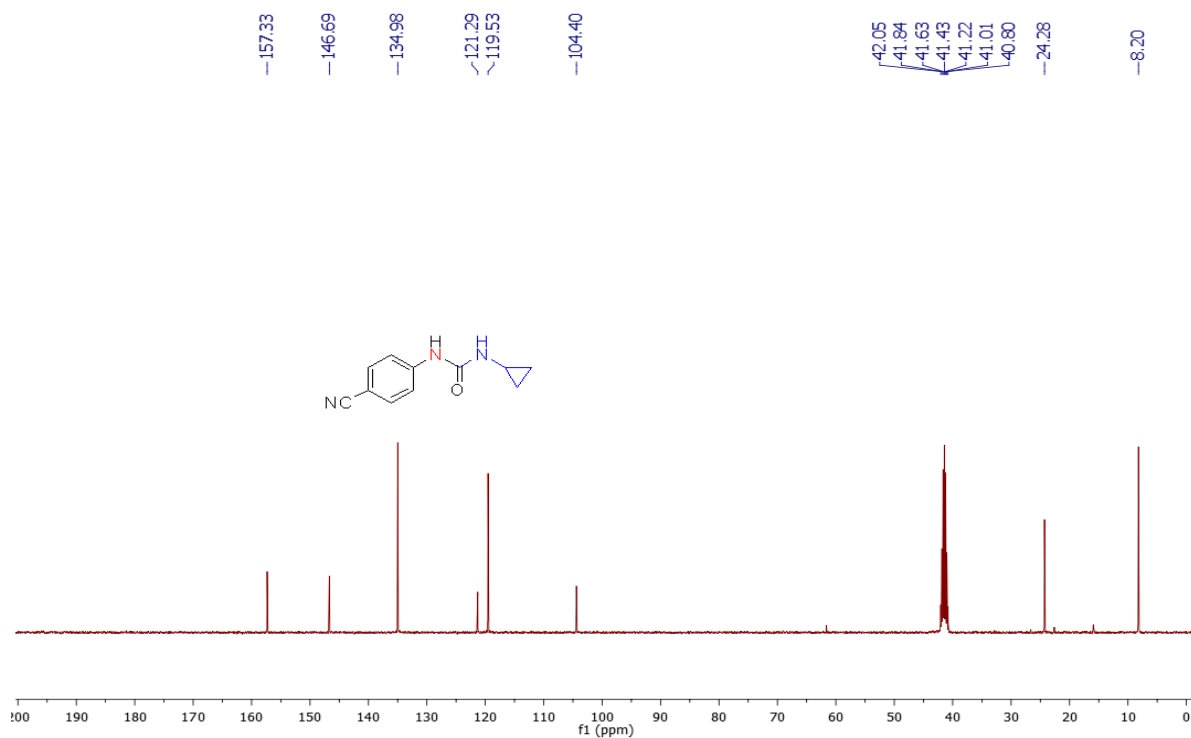



## DEPT of 1-(4-cyanophenyl)-3-cyclopropylurea (3z)

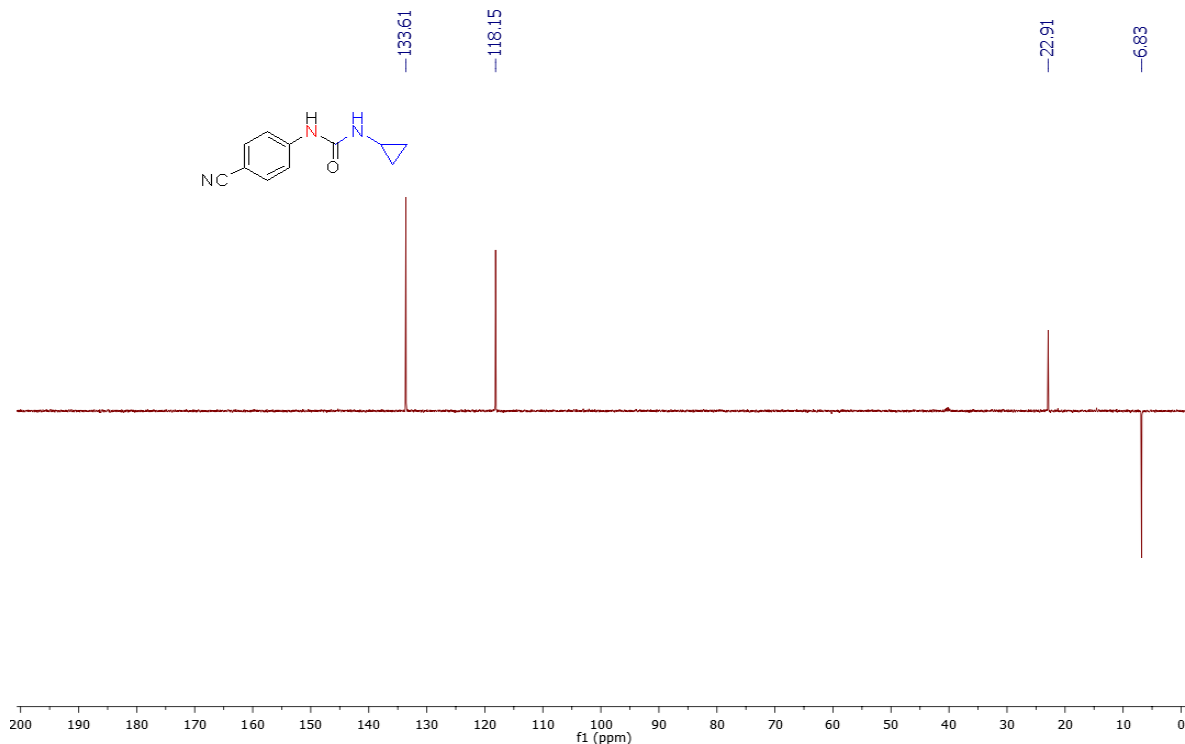

## HRMS of 1-(4-cyanophenyl)-3-cyclopropylurea (3z)

### Elemental Composition Report

Page 1

#### Single Mass Analysis

Tolerance = 5.0 PPM / DBE: min = -1.5, max = 50.0

Element prediction: Off

Number of isotope peaks used for i-FIT = 3

Monoisotopic Mass, Even Electron Ions

21 formula(e) evaluated with 1 results within limits (up to 3 closest results for each mass)

Elements Used:

C: 0-13 H: 0-200 N: 0-4 O: 0-1

F-166

281221\_35 8 (0.172) Cm (8:9)

QMI DIVISION, CSIR-IIIM JAMMU  
Xevo G2-XS QTOF YFC2015

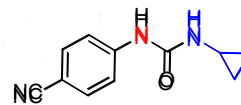

28-Dec-2021  
13:51:11  
1: TOF MS ES+  
4.66e+005

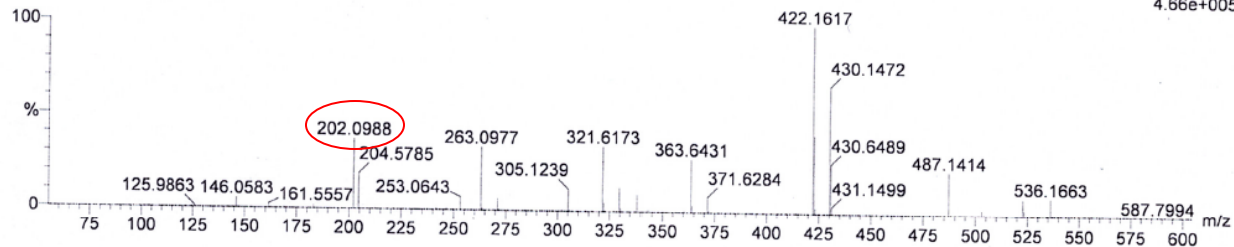

Minimum:

Maximum: 2.0 5.0 50.0

| Mass     | Calc. Mass | mDa | PPM | DBE | i-FIT | Norm | Conf (%) | Formula      |
|----------|------------|-----|-----|-----|-------|------|----------|--------------|
| 202.0988 | 202.0980   | 0.8 | 4.0 | 7.5 | 56.2  | n/a  | n/a      | C11 H12 N3 O |

### <sup>1</sup>H-NMR of N-(4-methoxyphenyl)piperazine-1-carboxamide (3aa)

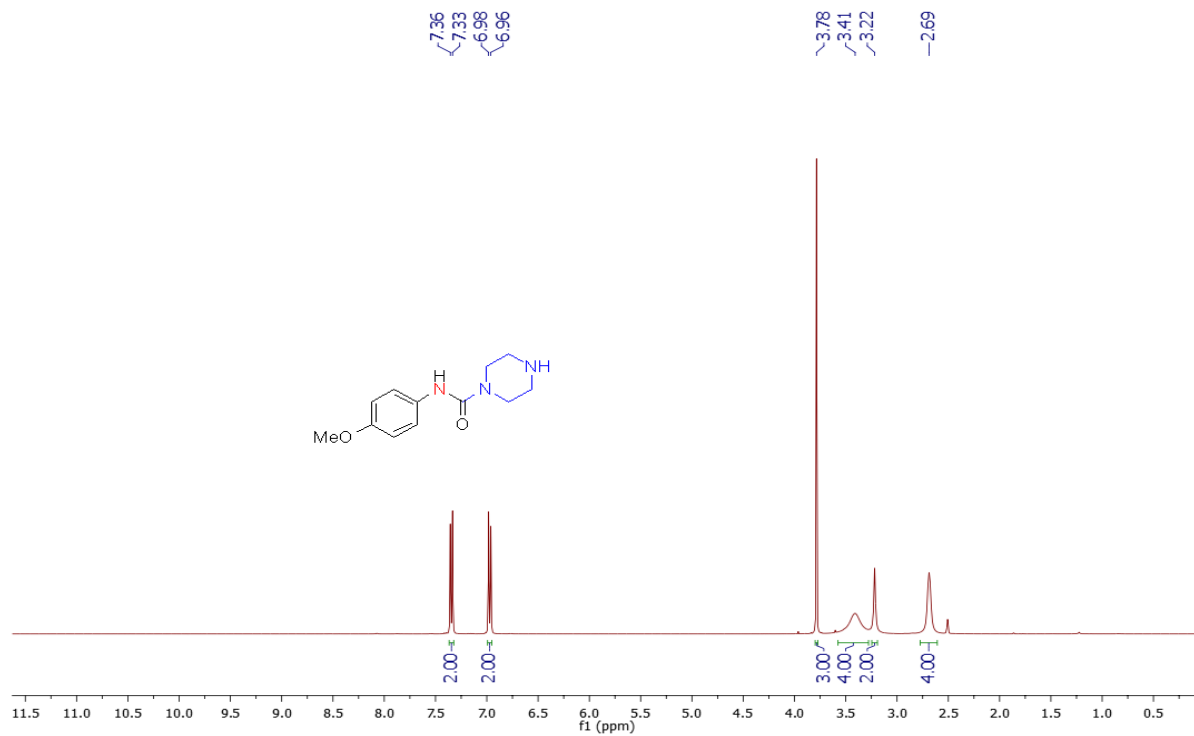

### <sup>13</sup>C-NMR of N-(4-methoxyphenyl)piperazine-1-carboxamide (3aa)

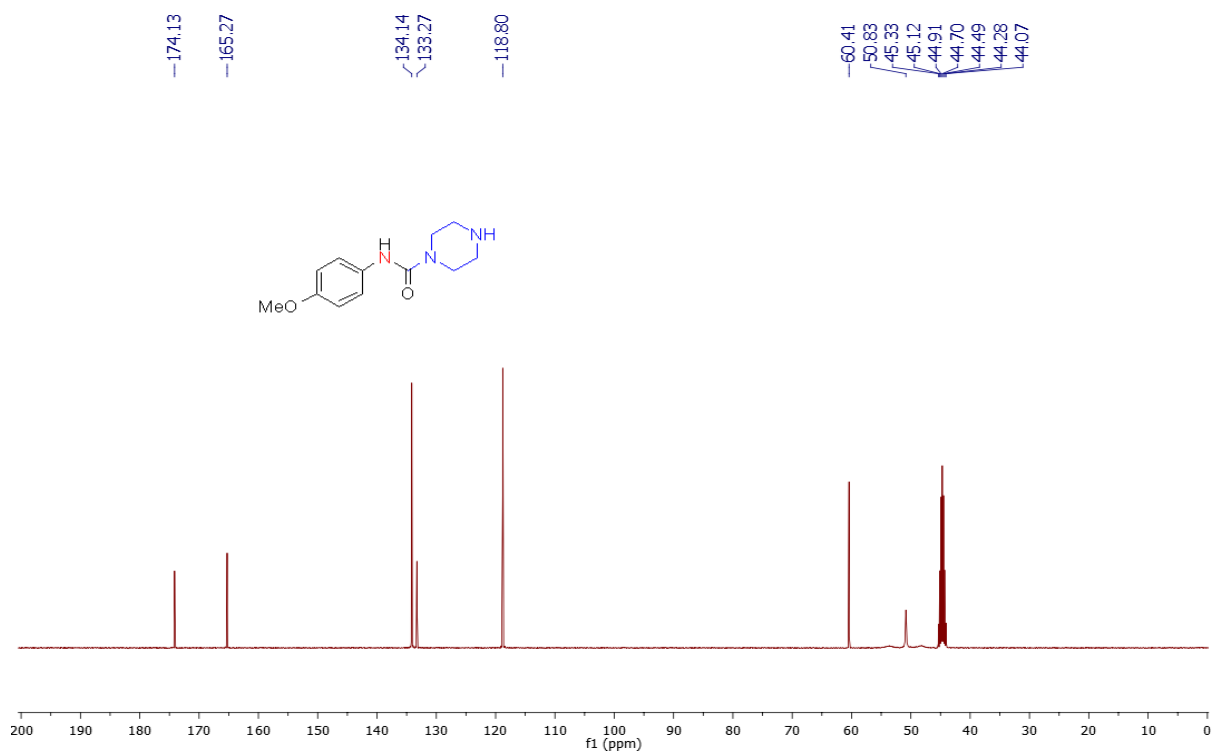

## DEPT of *N*-(4-methoxyphenyl)piperazine-1-carboxamide (3aa)

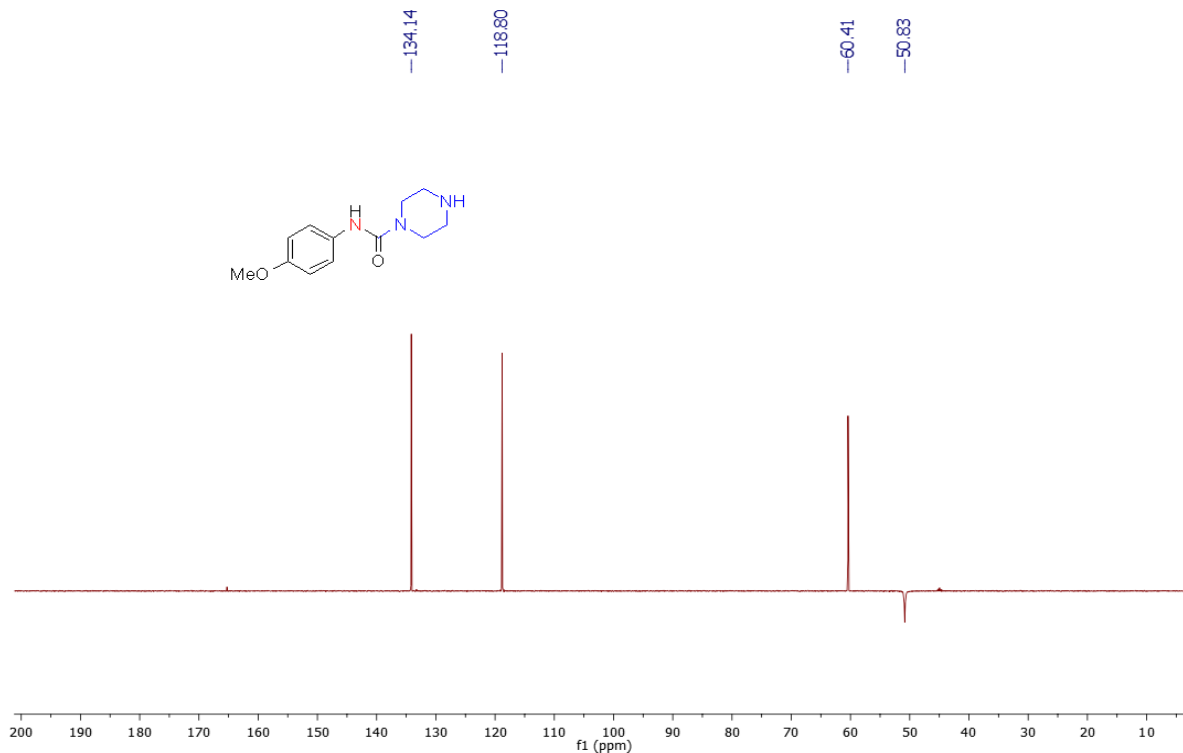

## HRMS of *N*-(4-methoxyphenyl)piperazine-1-carboxamide (3aa)

### Elemental Composition Report

Page 1

#### Single Mass Analysis

Tolerance = 5.0 PPM / DBE: min = -1.5, max = 50.0

Element prediction: Off

Number of isotope peaks used for i-FIT = 3

Monoisotopic Mass, Even Electron Ions

25 formula(e) evaluated with 1 results within limits (up to 3 closest results for each mass)

Elements Used:

C: 0-12 H: 0-200 N: 0-3 O: 0-2 Na: 0-1

MK1

281221\_27 16 (0.327) Cm (16)

QMI DIVISION, CSIR-IIIM JAMMU  
Xevo G2-XS QTOF YFC2015

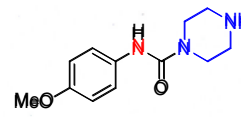

28-Dec-2021  
13:30:39  
1: TOF MS ES+  
2.03e+005

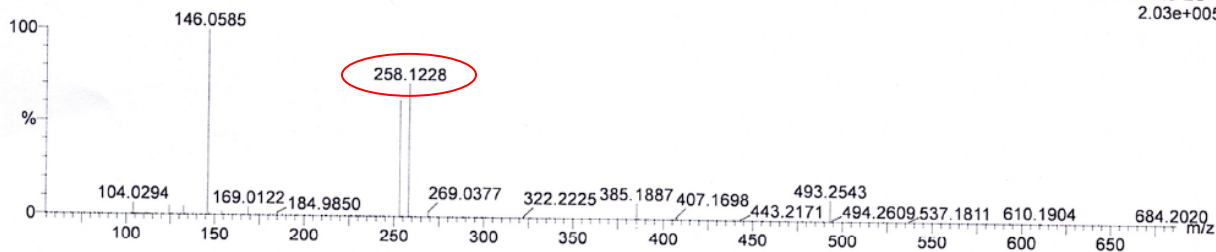

Minimum: -1.5  
Maximum: 2.0 5.0 50.0

| Mass     | Calc. Mass | mDa | PPM | DBE | i-FIT | Norm | Conf (%) | Formula          |
|----------|------------|-----|-----|-----|-------|------|----------|------------------|
| 258.1228 | 258.1218   | 1.0 | 3.9 | 5.5 | 33.8  | n/a  | n/a      | C12 H17 N3 O2 Na |

### <sup>1</sup>H-NMR of *N*-(4-cyanophenyl)piperazine-1-carboxamide (3ab)

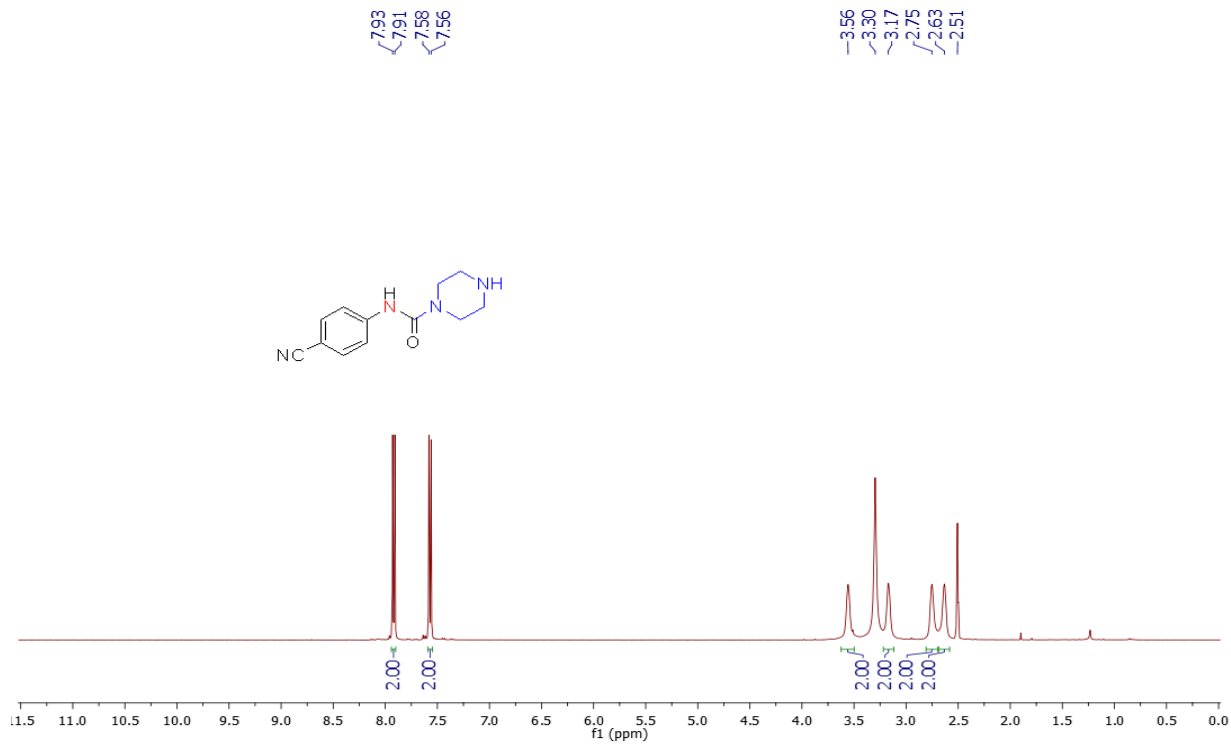

### <sup>13</sup>C-NMR of *N*-(4-cyanophenyl)piperazine-1-carboxamide (3ab)

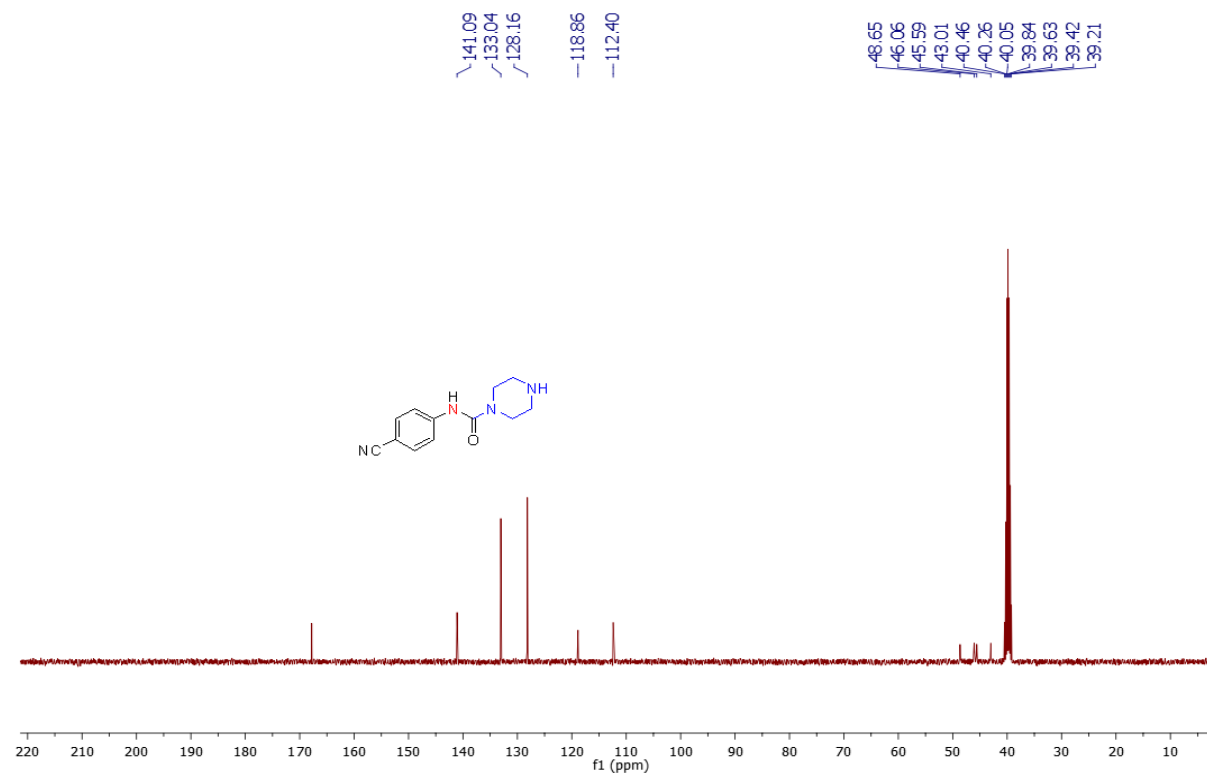

# DEPT of *N*-(4-cyanophenyl)piperazine-1-carboxamide (3ab)

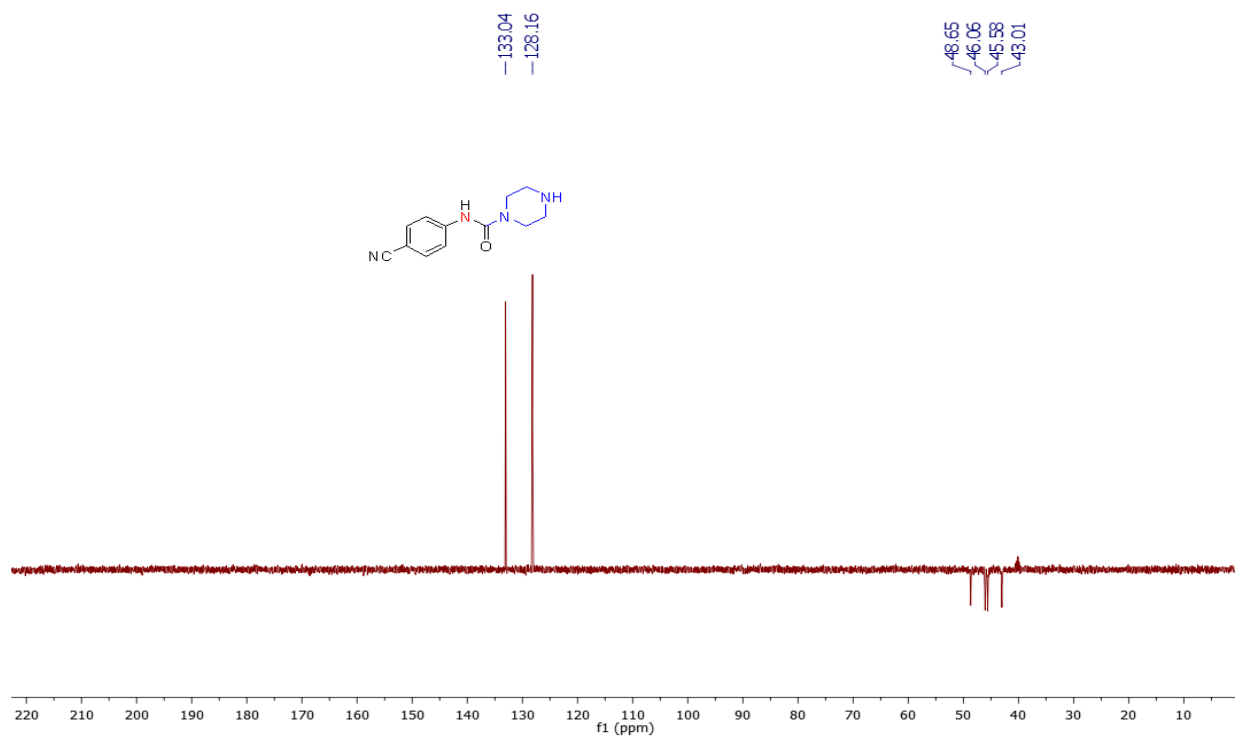

# Mass spectra of *N*-(4-cyanophenyl)piperazine-1-carboxamide (3ab)

## Sample Information

Sample Name : F 263  
Tray# : 1  
Injection Volume : 0.5  
Method File : MASS SCANN 13APRIL2021.lcm  
Date Processed : 1/28/2022 6:11:18 PM

Sample ID :  
Vial# : 70  
Data File : 28-JAN-22-58.lcd

Processed by : System Administrator

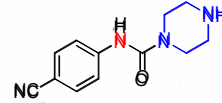

## MS Spectrum

BG Mode:None \$Endf\$ Segment 1 - Event 1  
Product Ion Scan Precursor:231.0000 CE:-5.0

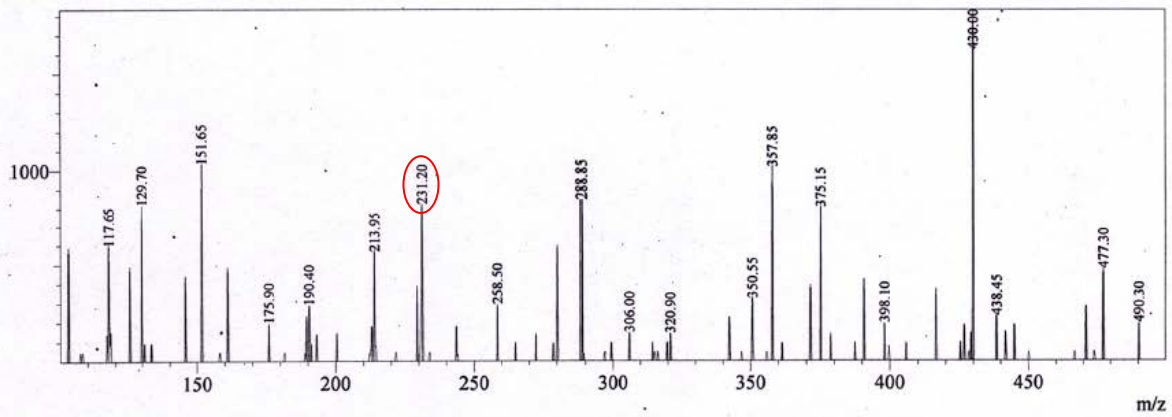

BG Mode:None \$Endf\$ Segment 1 - Event 2  
Product Ion Scan Precursor:229.0000 CE:5.0

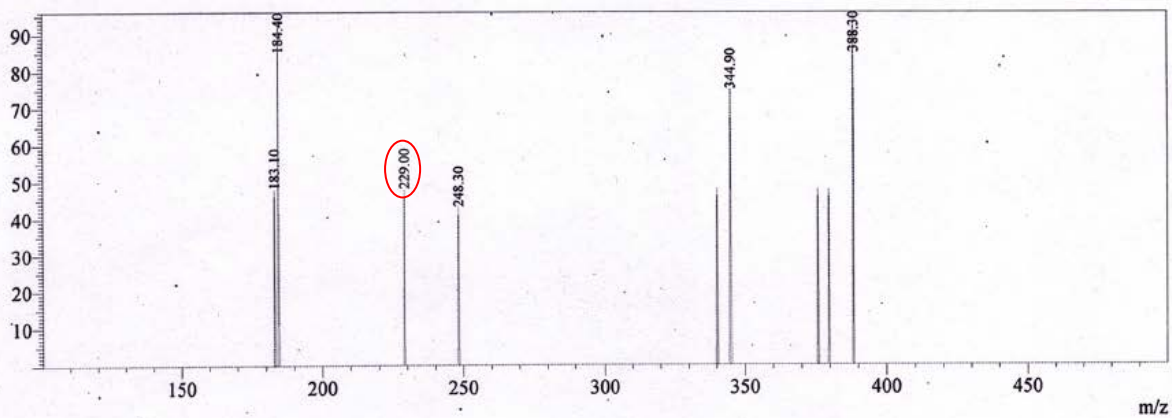

### <sup>1</sup>H-NMR of tert-butyl 4-((4-methoxyphenyl)carbamoyl)piperazine-1-carboxylate (3ac)

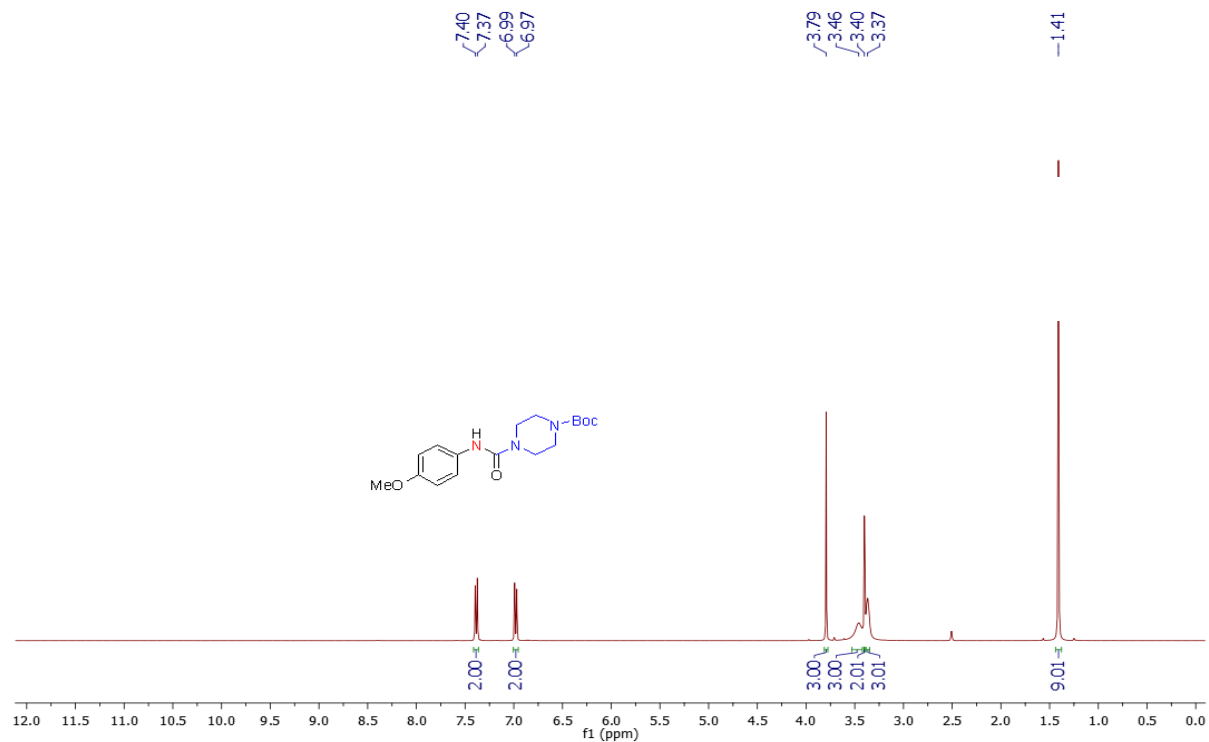

### <sup>13</sup>C-NMR of tert-butyl 4-((4-methoxyphenyl)carbamoyl)piperazine-1-carboxylate (3ac)

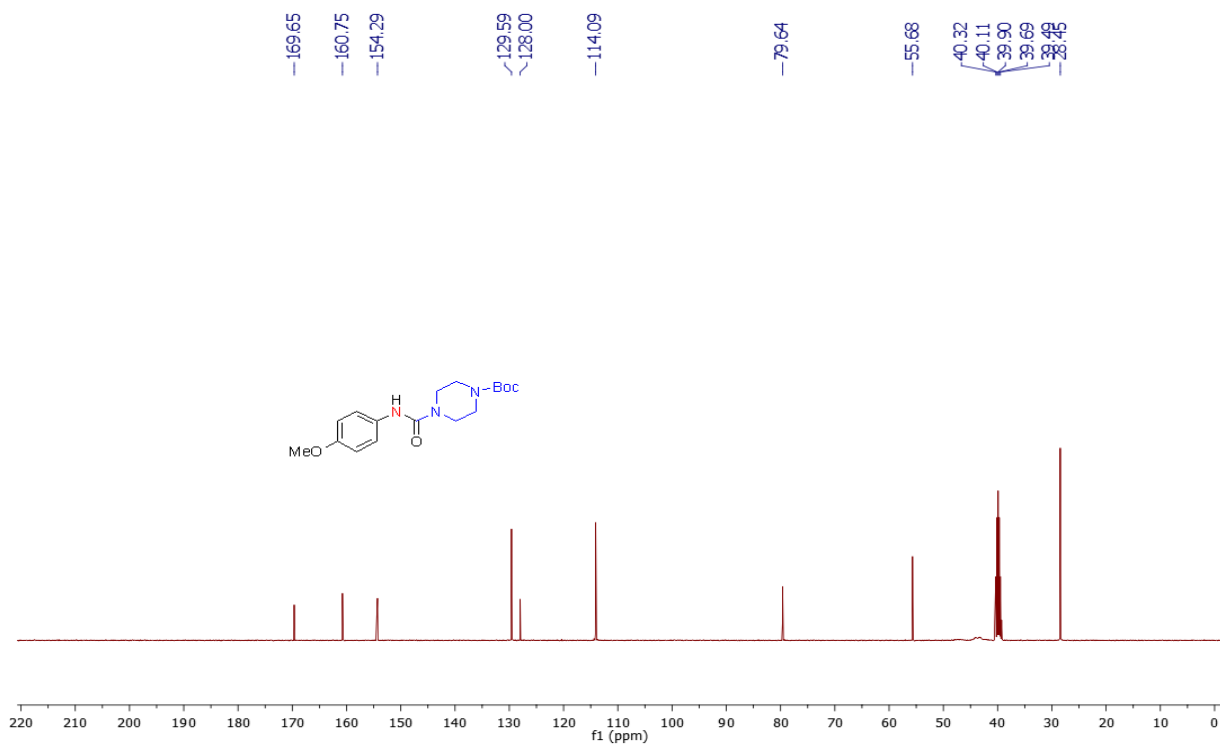

### DEPT of tert-butyl 4-((4-methoxyphenyl)carbamoyl)piperazine-1-carboxylate (3ac)

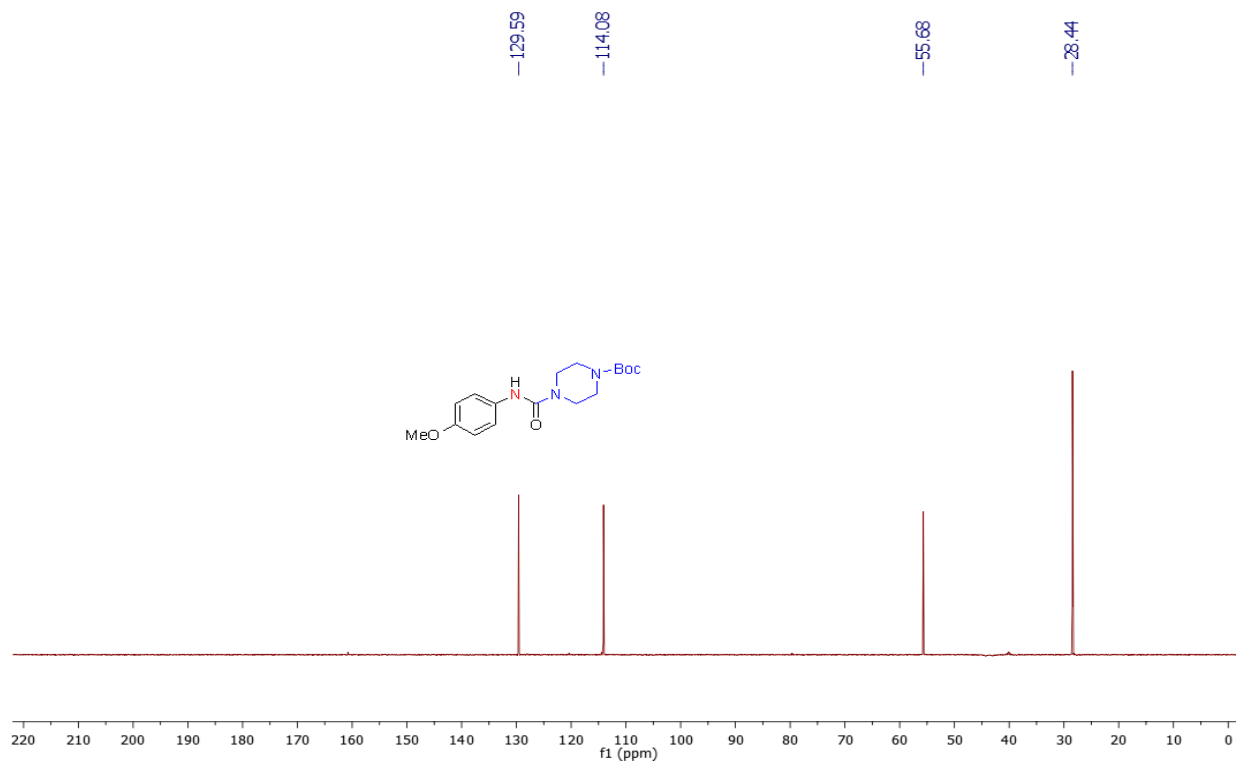

### <sup>1</sup>H-NMR of N-(4-cyanophenyl)-4-methylpiperazine-1-carboxamide (3ad)

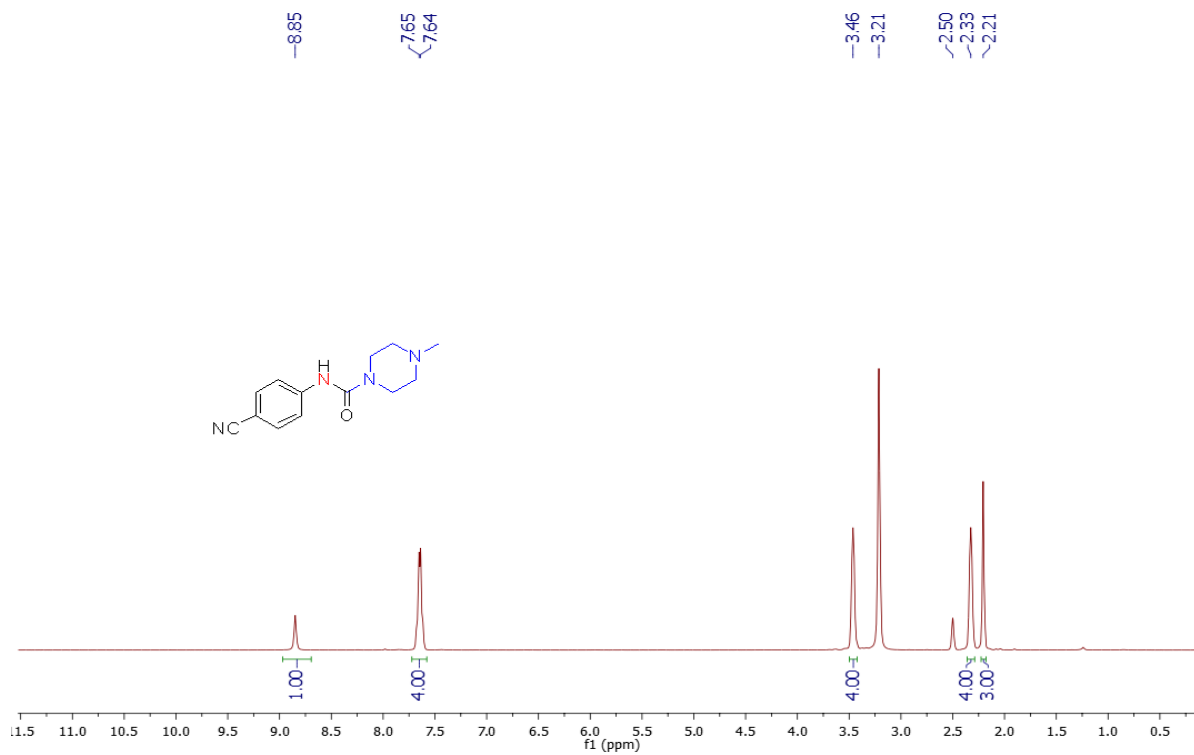



### <sup>13</sup>C-NMR of *N*-(4-cyanophenyl)-4-methylpiperazine-1-carboxamide (3ad)

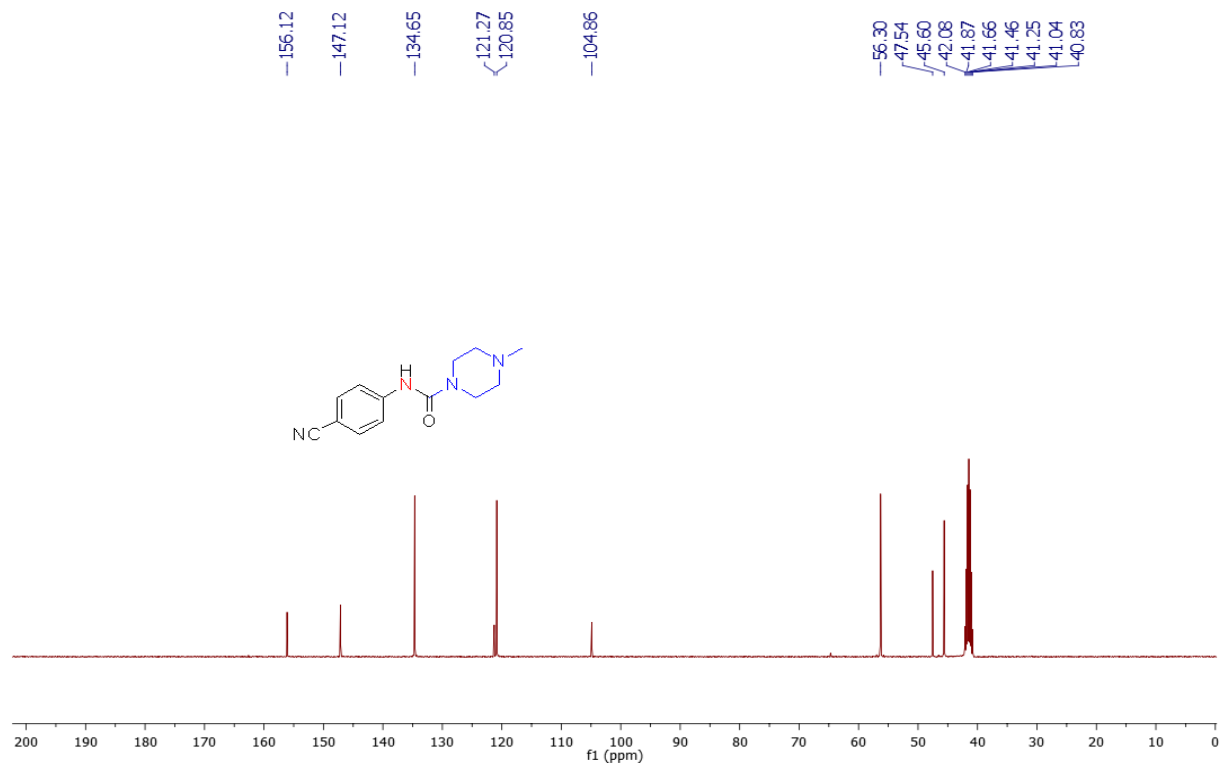

### DEPT of *N*-(4-cyanophenyl)-4-methylpiperazine-1-carboxamide (3ad)

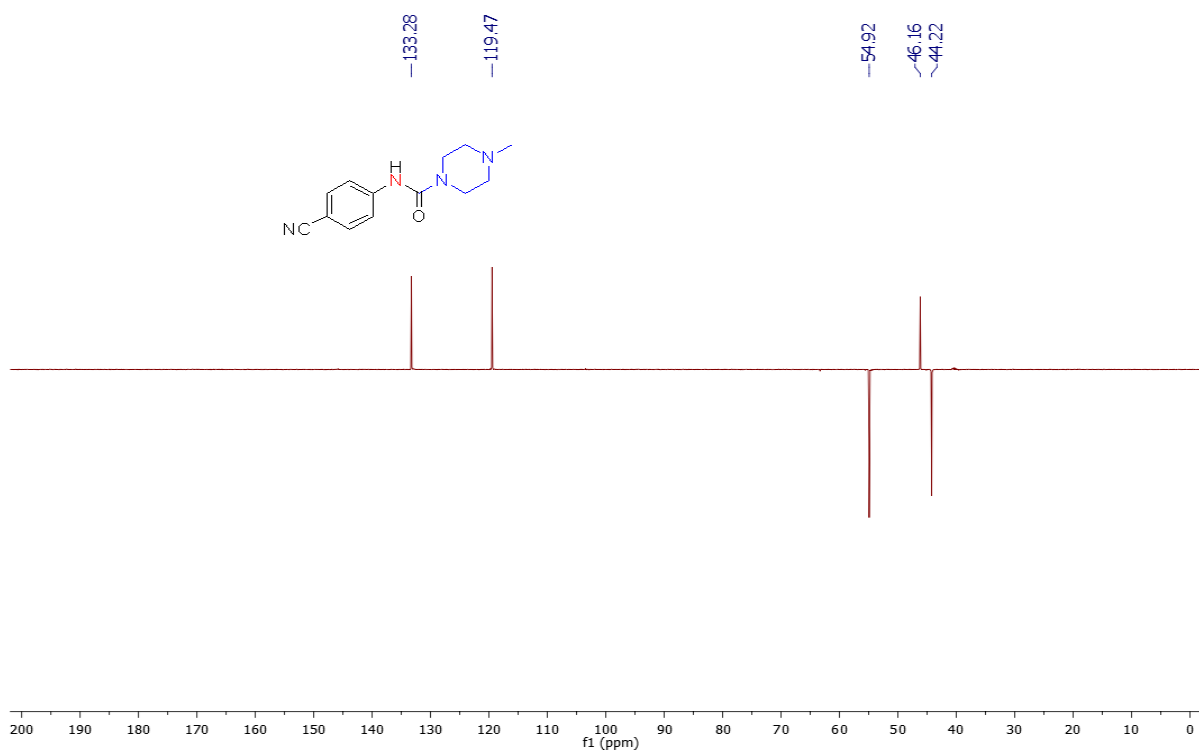

## HRMS (ESI-TOF) of compound (3ad)

### Elemental Composition Report

Page 1

#### Single Mass Analysis

Tolerance = 5.0 PPM / DBE: min = -1.5, max = 50.0

Element prediction: Off

Number of isotope peaks used for i-FIT = 3

Monoisotopic Mass, Even Electron Ions

11 formula(e) evaluated with 1 results within limits (up to 3 closest results for each mass)

Elements Used:

C: 0-13 H: 0-200 N: 0-4 O: 0-1

F-171

200921\_19 8 (0.172) Cm (8)

QMI DIVISION, CSIR-IIIM JAMMU  
Xevo G2-XS QTOF YFC2015

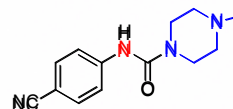

20-Sep-2021  
12:45:24  
1: TOF MS ES+  
3.84e+005

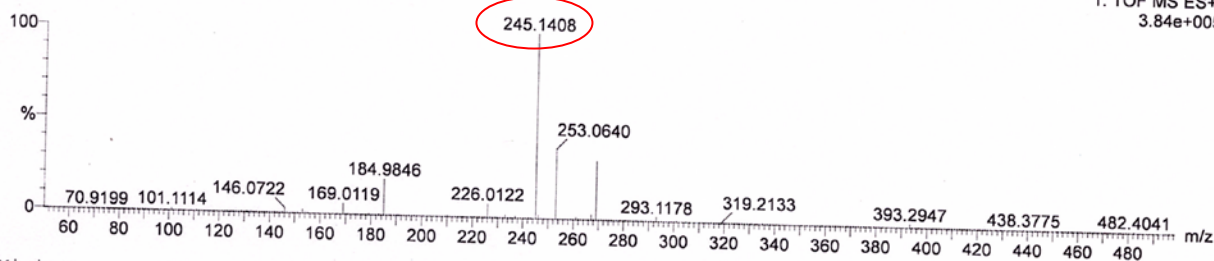

Minimum:

Maximum: 2.0 5.0 -1.5

| Mass     | Calc. Mass | mDa | PPM | DBE | i-FIT | Norm | Conf (%) | Formula      |
|----------|------------|-----|-----|-----|-------|------|----------|--------------|
| 245.1408 | 245.1402   | 0.6 | 2.4 | 7.5 | 45.3  | n/a  | n/a      | C13 H17 N4 O |

## <sup>1</sup>H-NMR of 4-cyclopropyl-N-(4-methoxyphenyl)piperazine-1-carboxamide (3ae)

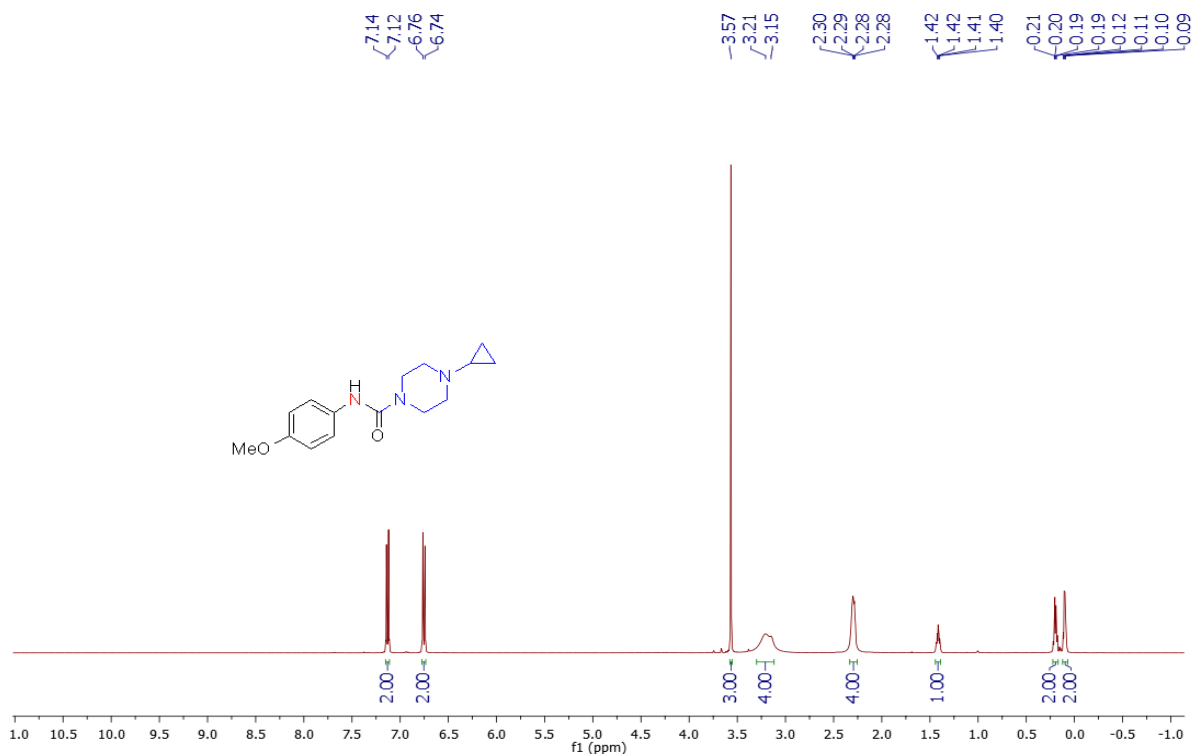

### <sup>13</sup>C-NMR of 4-cyclopropyl-N-(4-methoxyphenyl)piperazine-1-carboxamide (3ae)

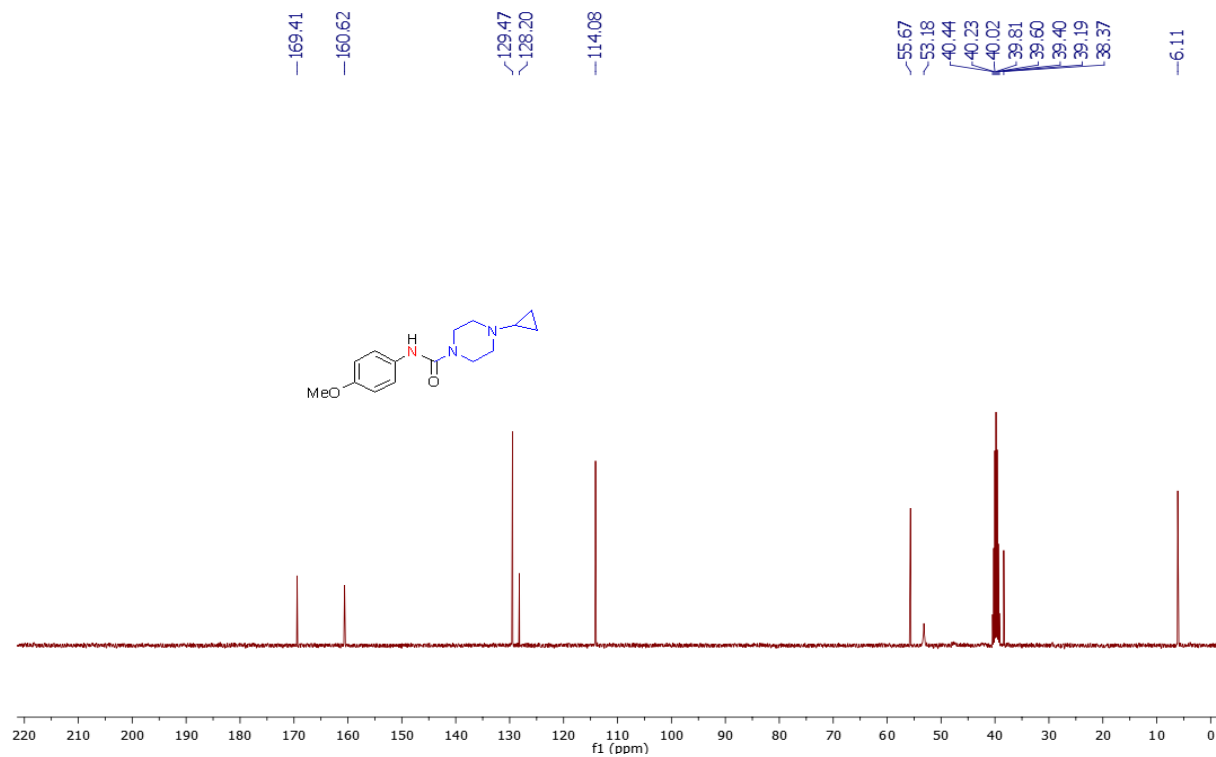

### DEPT of 4-cyclopropyl-N-(4-methoxyphenyl)piperazine-1-carboxamide (3ae)

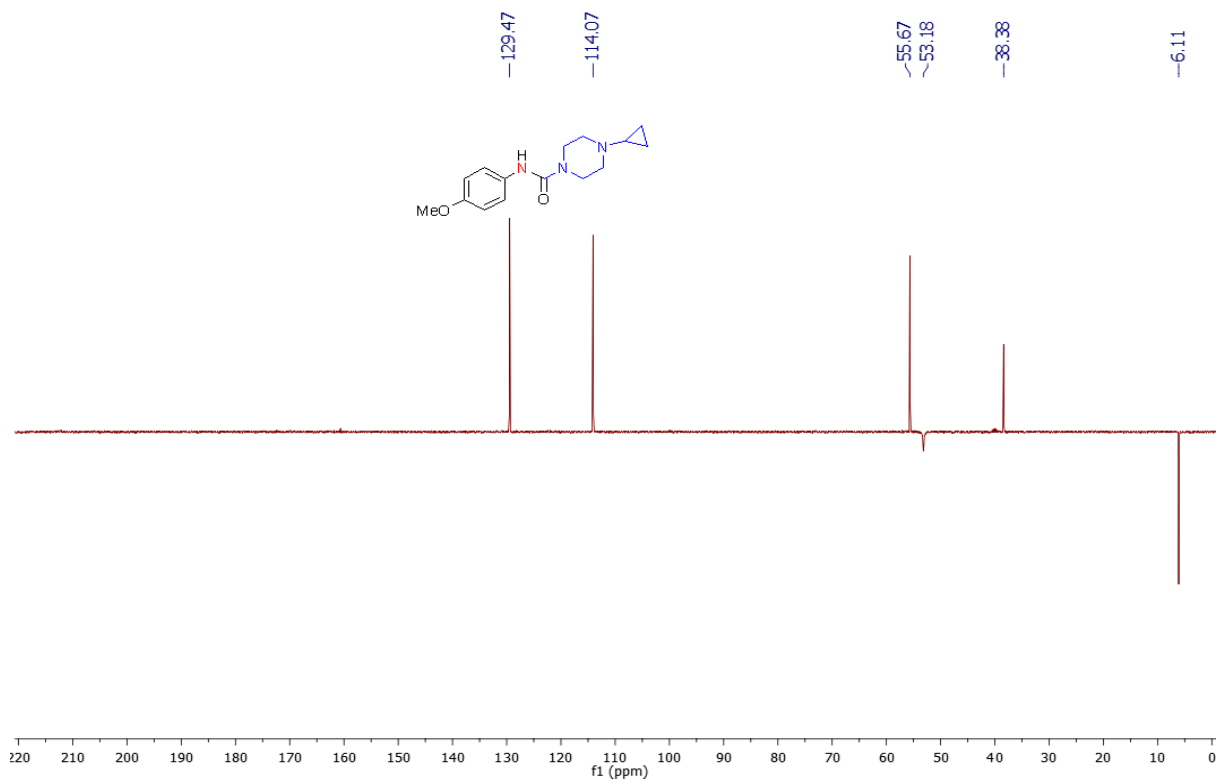

# Mass spectra of 4-cyclopropyl-N-(4-methoxyphenyl)piperazine-1-carboxamide (3ae)

## SHIMADZU LabSolutions Analysis Report

### <Sample Information>

Sample Name : 4 D  
Sample ID :  
Data Filename : 28-JAN-22-60.lcd  
Method Filename : MASS SCANNN 13APRIL2021.lcm  
Batch Filename : 28.01.2022.lcb  
Vial # : 1-77  
Injection Volume : 0.5 uL  
Date Acquired : 1/28/2022 6:19:38 PM  
Date Processed : 1/28/2022 6:20:40 PM

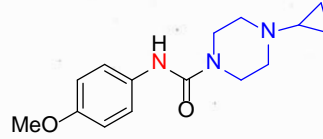

Sample Type : Unknown  
Acquired by : System Administrator  
Processed by : System Administrator

### <Chromatogram>

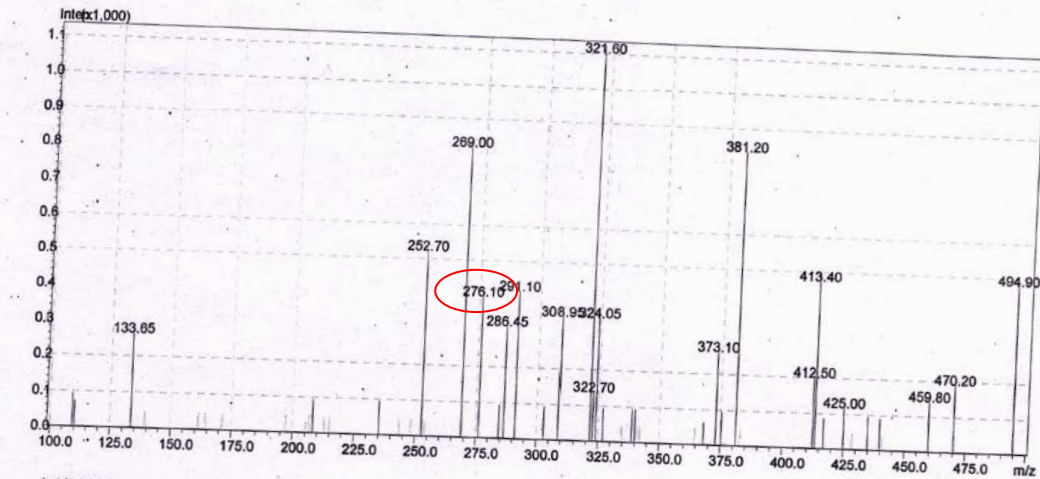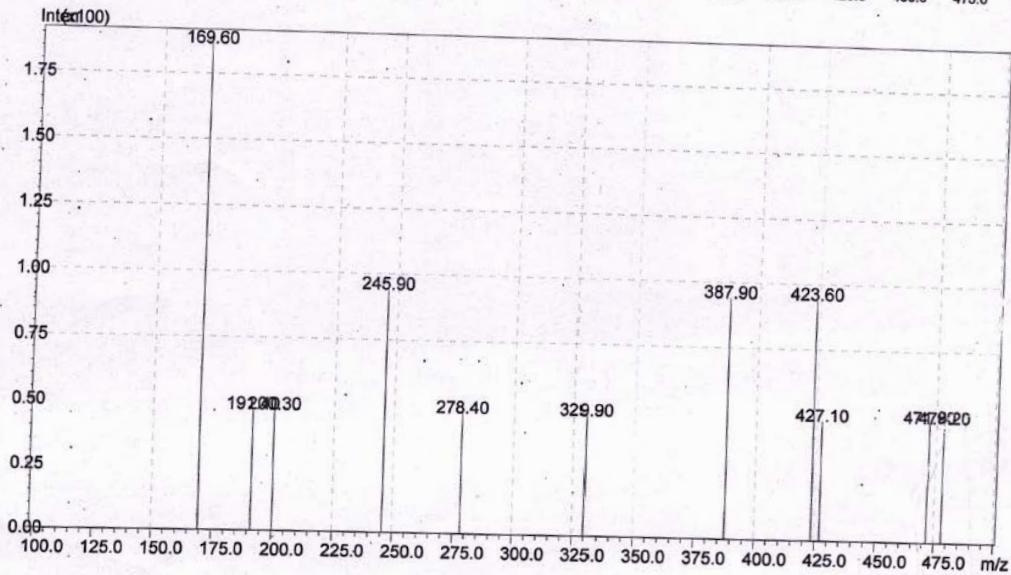

### <sup>1</sup>H-NMR of *N*-(4-cyanophenyl)-4-cyclopropylpiperazine-1-carboxamide (3af)

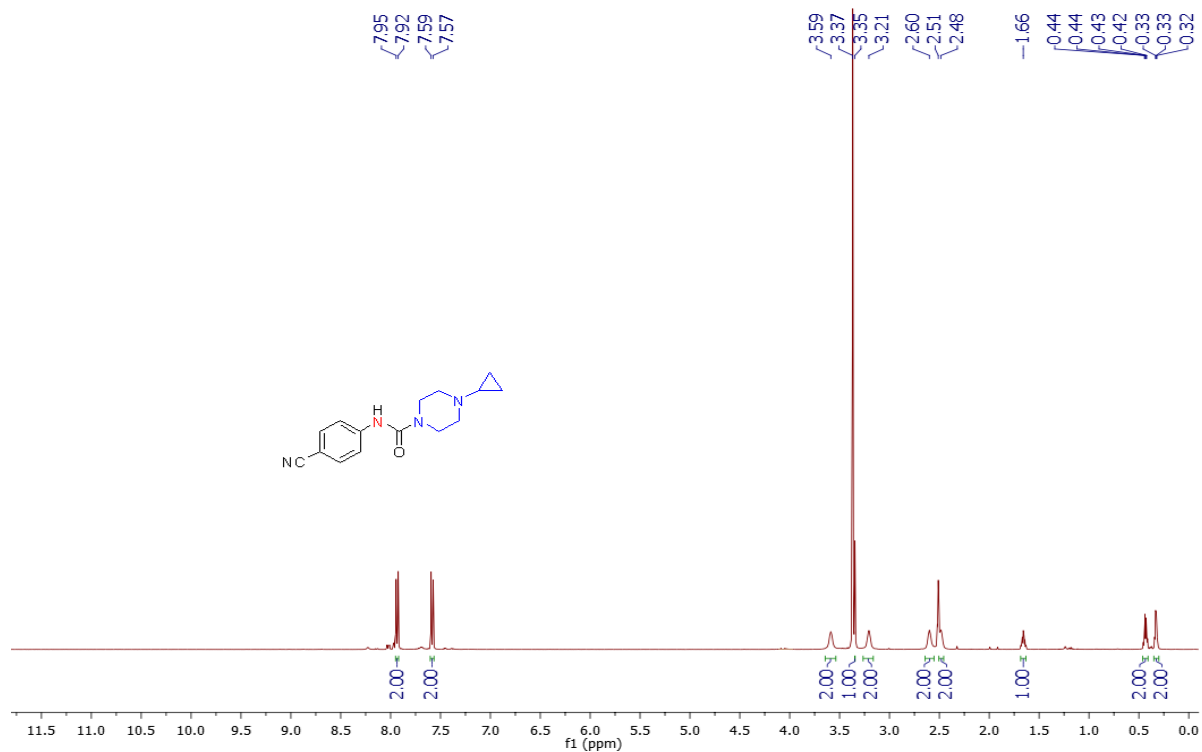

### <sup>13</sup>C-NMR of *N*-(4-cyanophenyl)-4-cyclopropylpiperazine-1-carboxamide (3af)

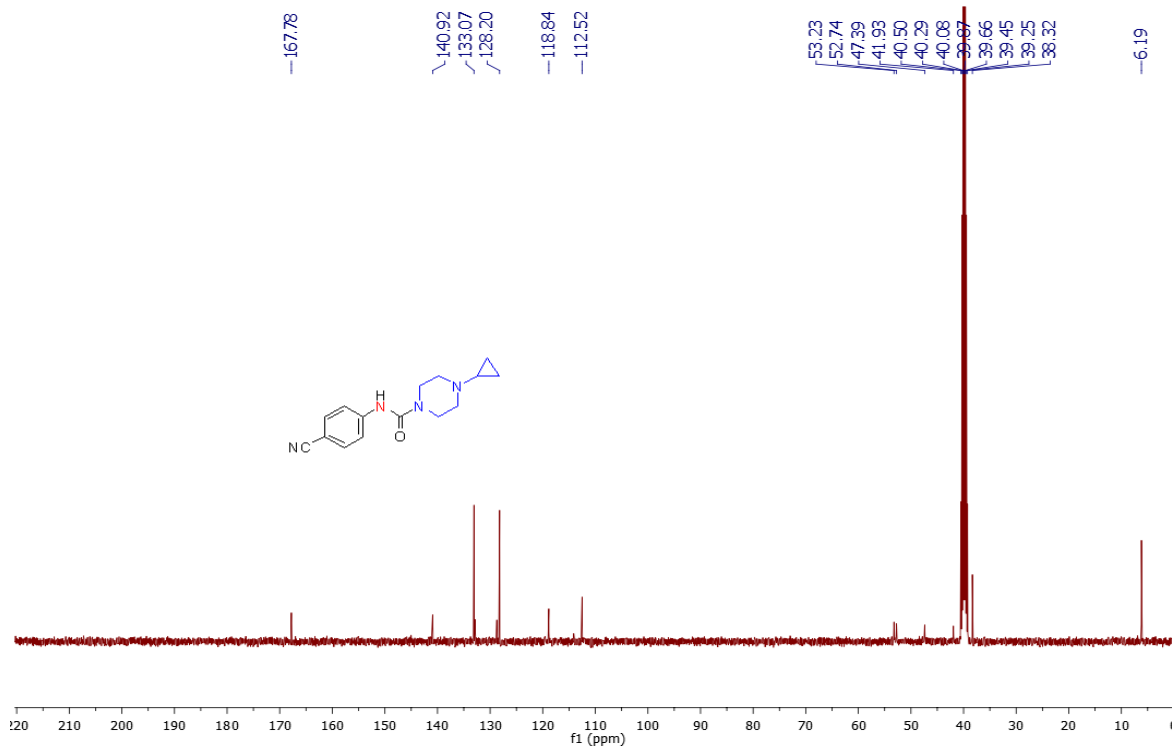

DEPT of *N*-(4-cyanophenyl)-4-cyclopropylpiperazine-1-carboxamide (3af)

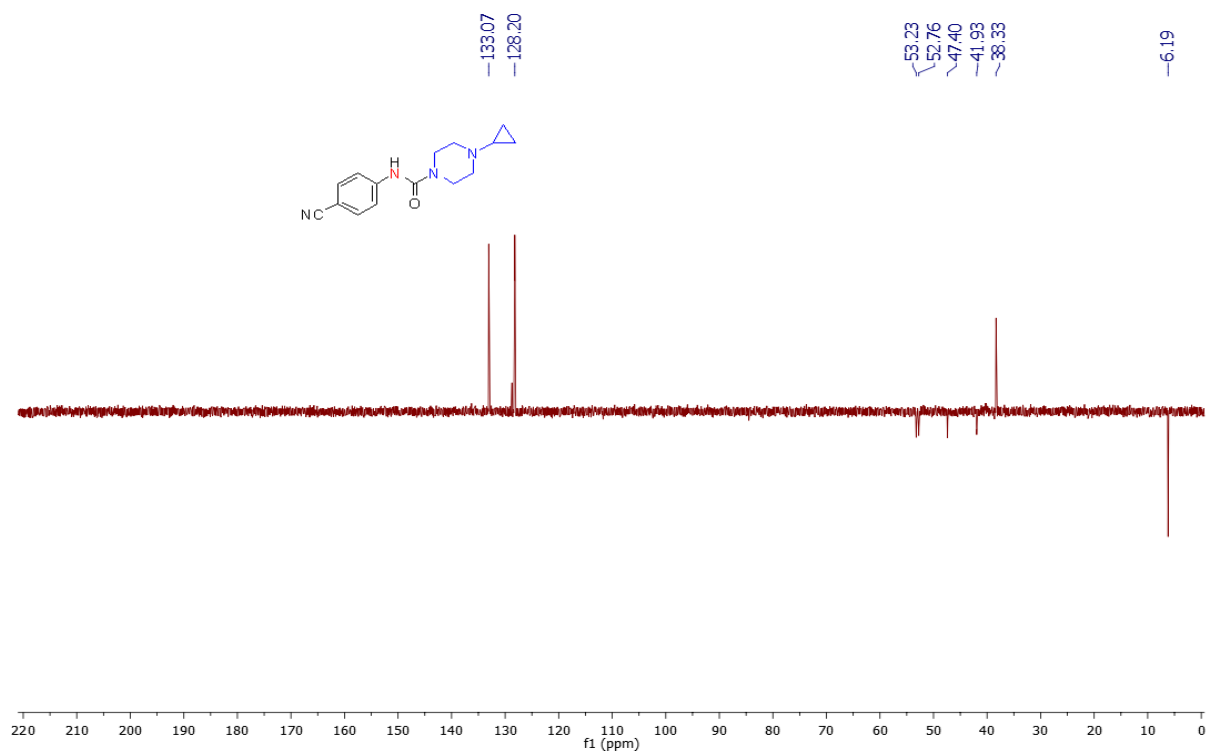

# Mass spectra of *N*-(4-cyanophenyl)-4-cyclopropylpiperazine-1-carboxamide (3af)

## Sample Information

|                  |                               |              |                        |
|------------------|-------------------------------|--------------|------------------------|
| Sample Name      | : 4M                          | Sample ID    | :                      |
| Tray#            | : 1                           | Vial#        | : 76                   |
| Injection Volume | : 0.5                         | Data File    | : 28-JAN-22-48.lcd     |
| Method File      | : MASS SCANNN 13APRIL2021.lcm | Processed by | : System Administrator |
| Date Processed   | : 1/28/2022 5:24:34 PM        |              |                        |

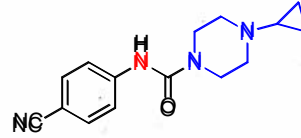

MS Spectrum

BG Mode: Calc \$EndIf\$ Segment 1 - Event 1  
Product Ion Scan Precursor: 269.0000 CE: -5.0

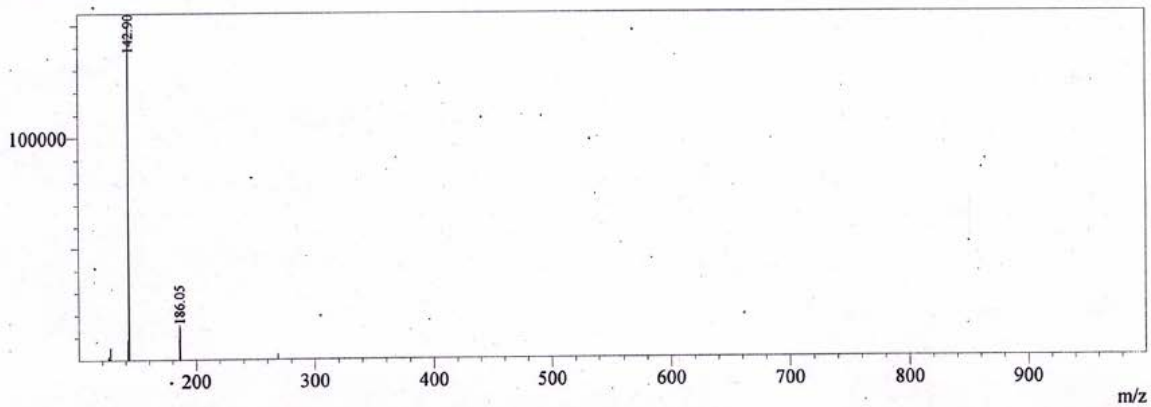

BG Mode: Calc \$EndIf\$ Segment 1 - Event 2  
Product Ion Scan Precursor: 269.0000 CE: 5.0

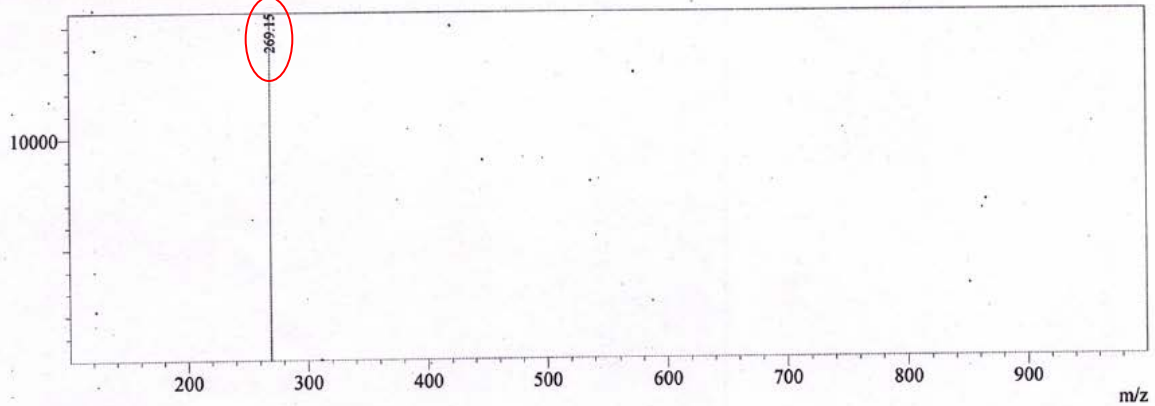

### <sup>1</sup>H-NMR of 4-cyclopropyl-N-phenylpiperazine-1-carboxamide (3ag)

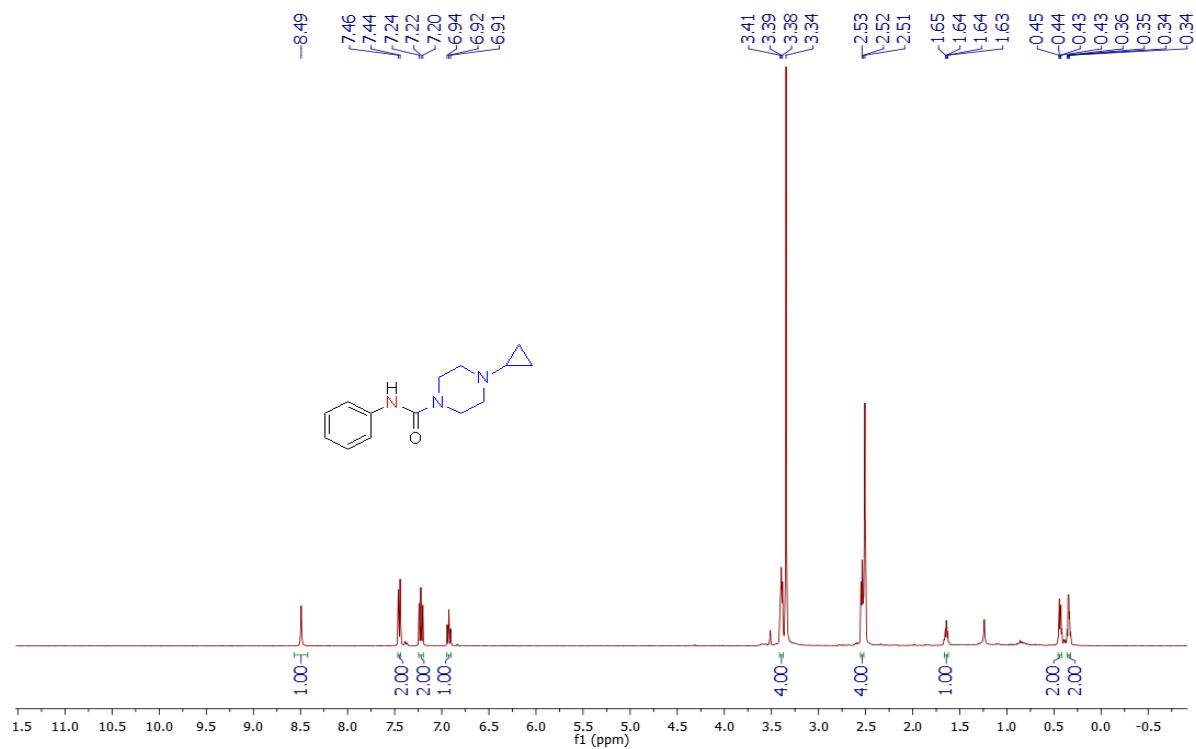

### <sup>13</sup>C-NMR of 4-cyclopropyl-N-phenylpiperazine-1-carboxamide (3ag)

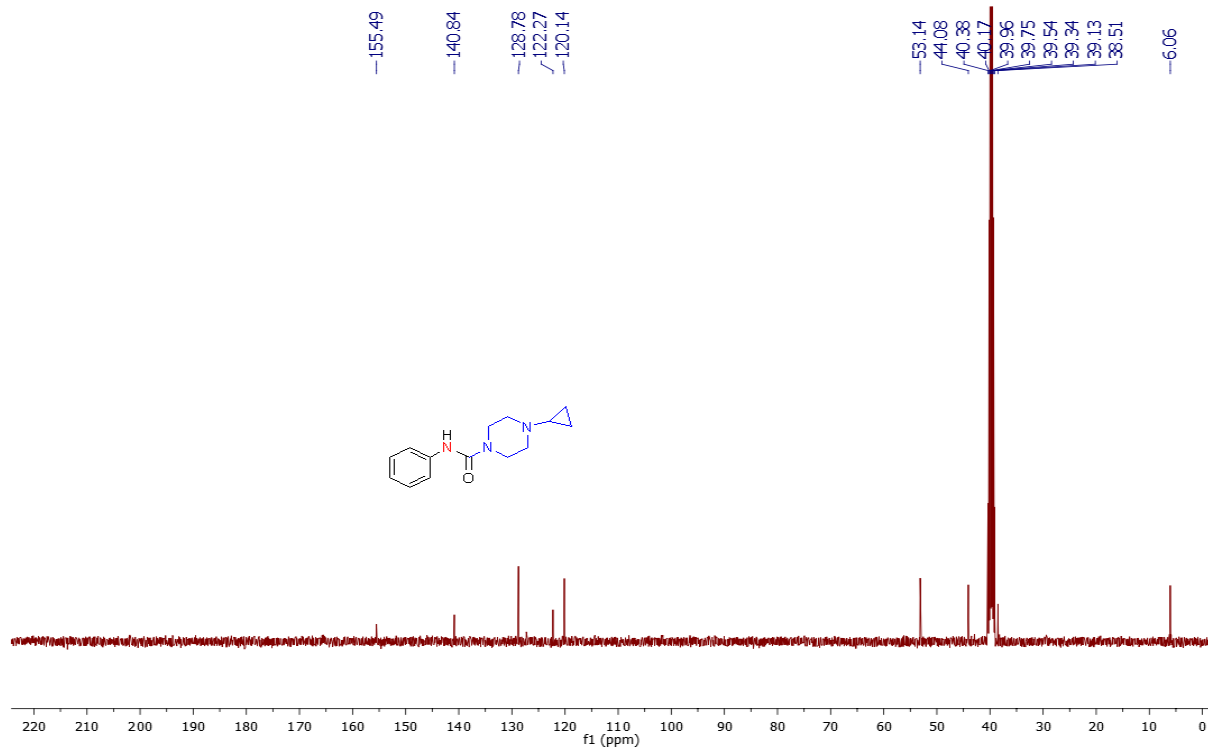



## DEPT of 4-cyclopropyl-N-phenylpiperazine-1-carboxamide (3ag)

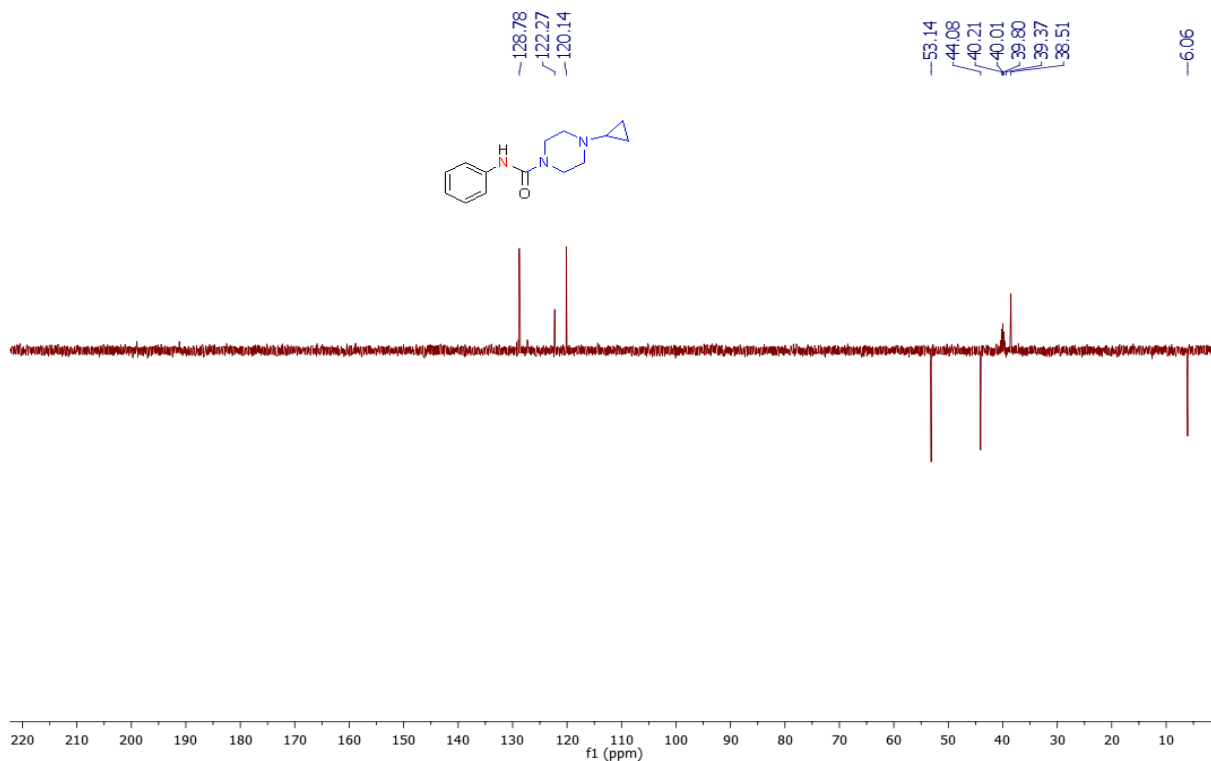

## HRMS of 4-cyclopropyl-N-phenylpiperazine-1-carboxamide (3ag)

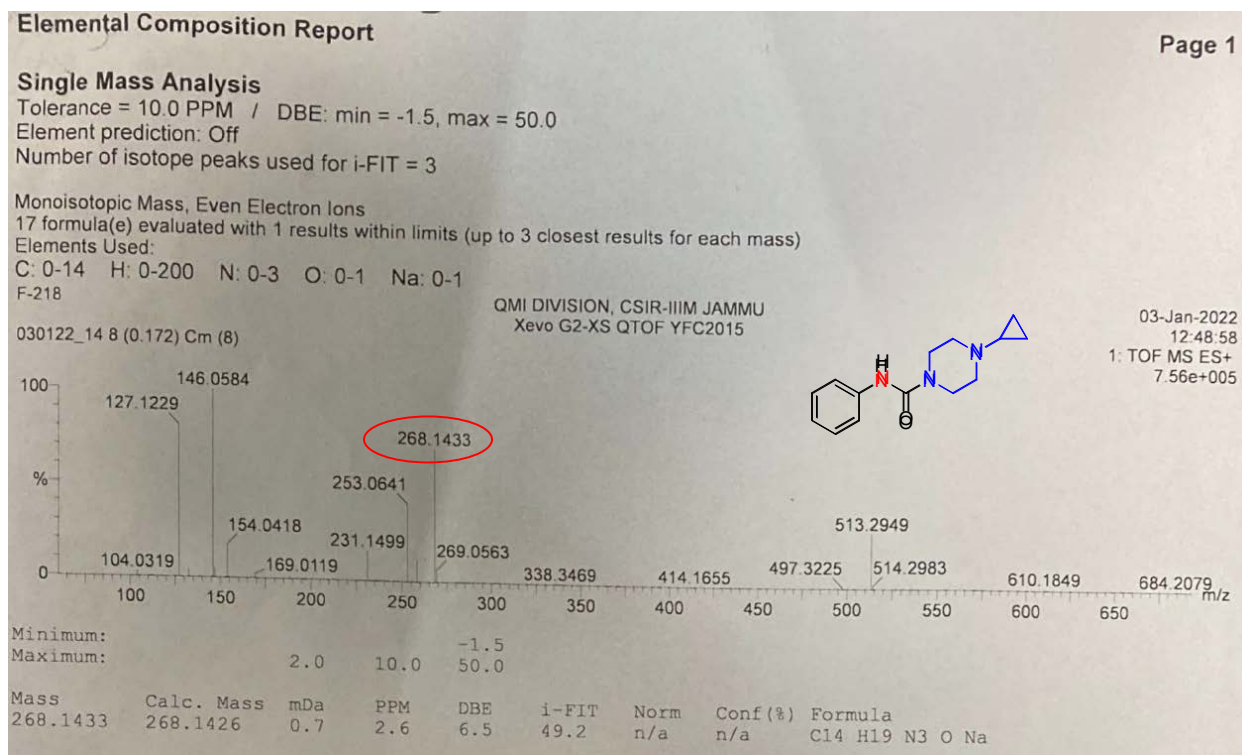

### <sup>1</sup>H-NMR of 1-phenyl-3-(o-tolyl)urea (3ah)

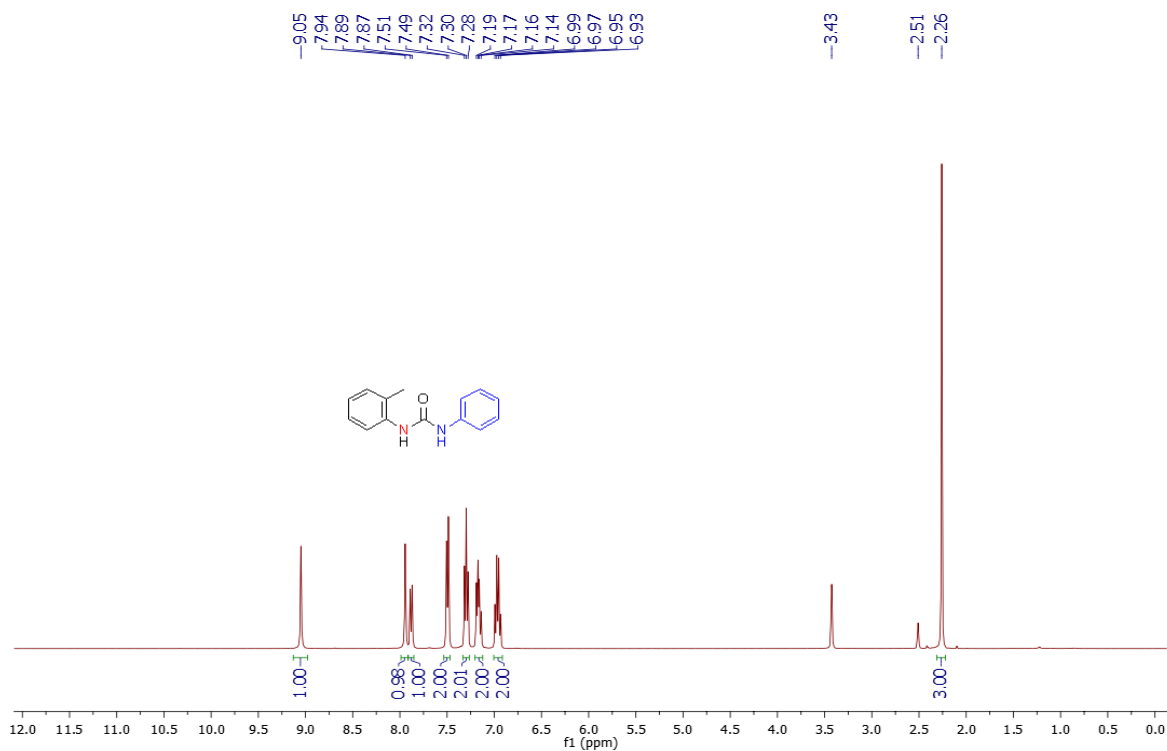

### <sup>13</sup>C-NMR of 1-phenyl-3-(o-tolyl)urea (3ah)

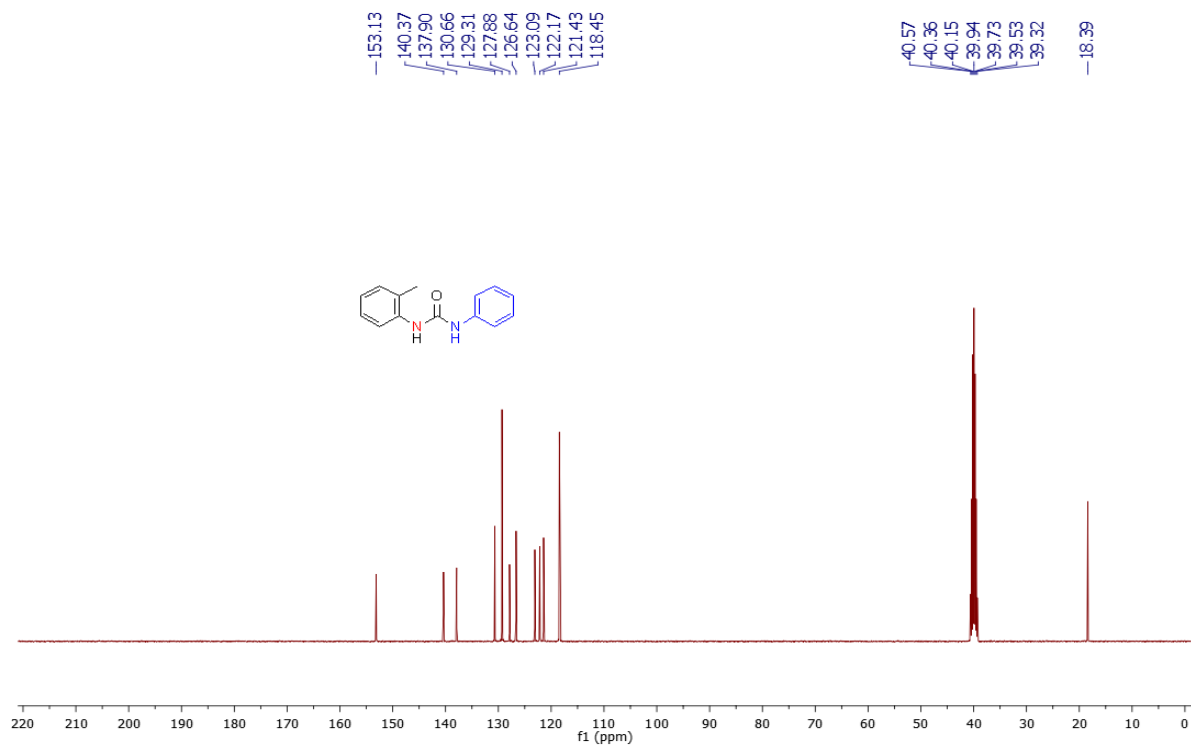

## DEPT of 1-phenyl-3-(*o*-tolyl)urea (3ah)

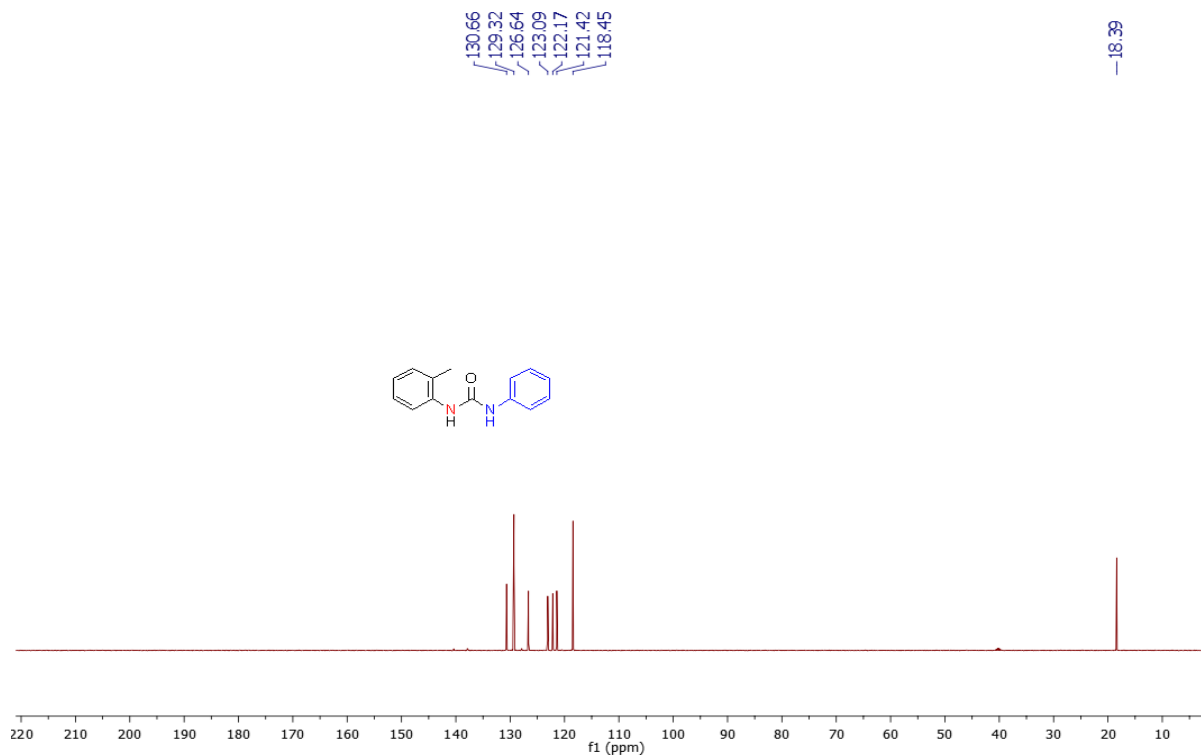

## HRMS of 1-phenyl-3-(*o*-tolyl)urea (3ah)

### Elemental Composition Report

#### Single Mass Analysis

Tolerance = 50.0 PPM / DBE: min = -1.5, max = 50.0

Element prediction: Off

Number of isotope peaks used for i-FIT = 3

Monoisotopic Mass, Even Electron Ions

15 formula(e) evaluated with 1 results within limits (up to 3 closest results for each mass)

Elements Used:

C: 0-14 H: 0-100 N: 0-2 O: 0-2

F-1

080422\_20 17 (0.363) Cm (17:18)

QMI DIVISION, CSIR-IIIM JAMMU  
Xevo G2-XS QTOF YFC2015

08-Apr-2022  
13:13:12  
1: TOF MS ES+  
6.41e+006

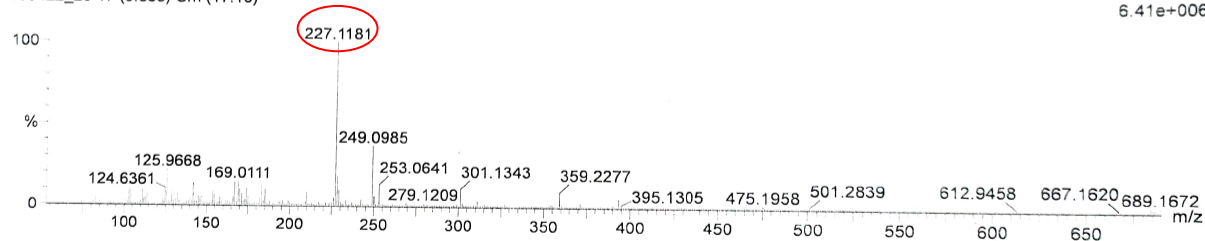

Minimum:

Maximum: 2.0 50.0 50.0

| Mass     | Calc. Mass | mDa  | PPM  | DBE | i-FIT | Norm | Conf (%) | Formula      |
|----------|------------|------|------|-----|-------|------|----------|--------------|
| 227.1181 | 227.1184   | -0.3 | -1.3 | 8.5 | 59.9  | n/a  | n/a      | C14 H15 N2 O |

### <sup>1</sup>H-NMR of 1-phenyl-3-(*m*-tolyl)urea (3ai)

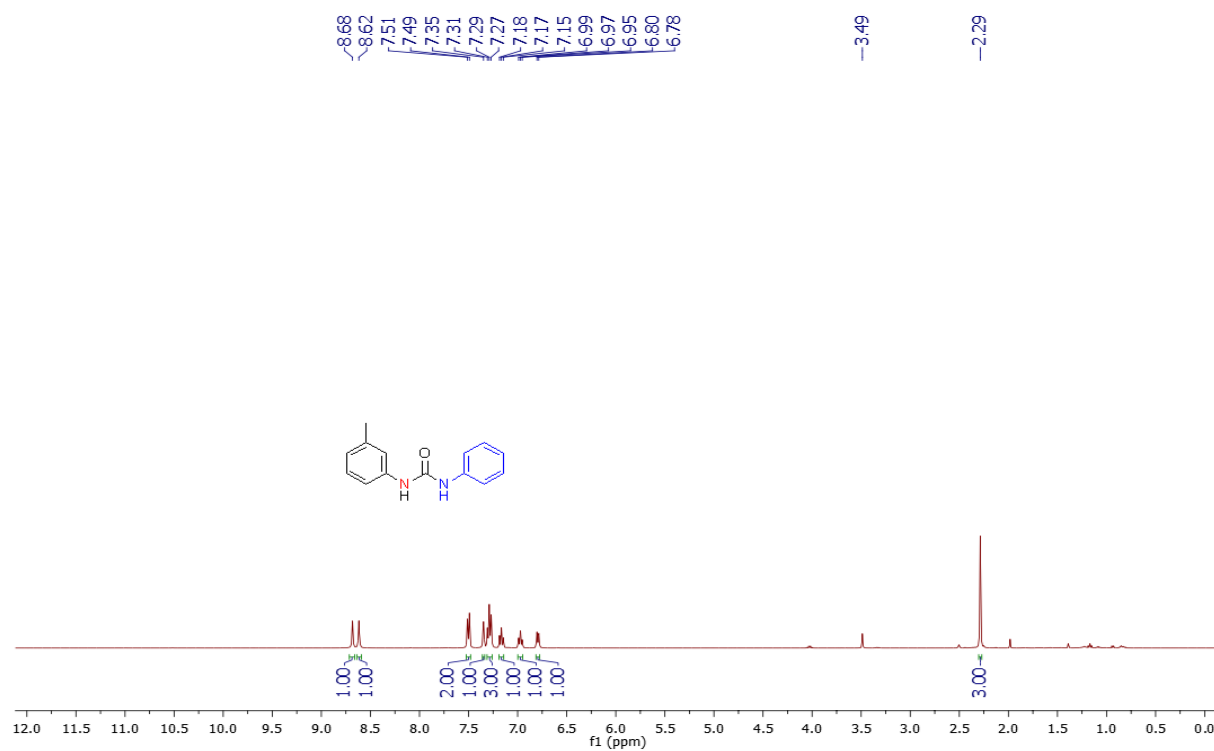

### <sup>13</sup>C-NMR of 1-phenyl-3-(*m*-tolyl)urea (3ai)

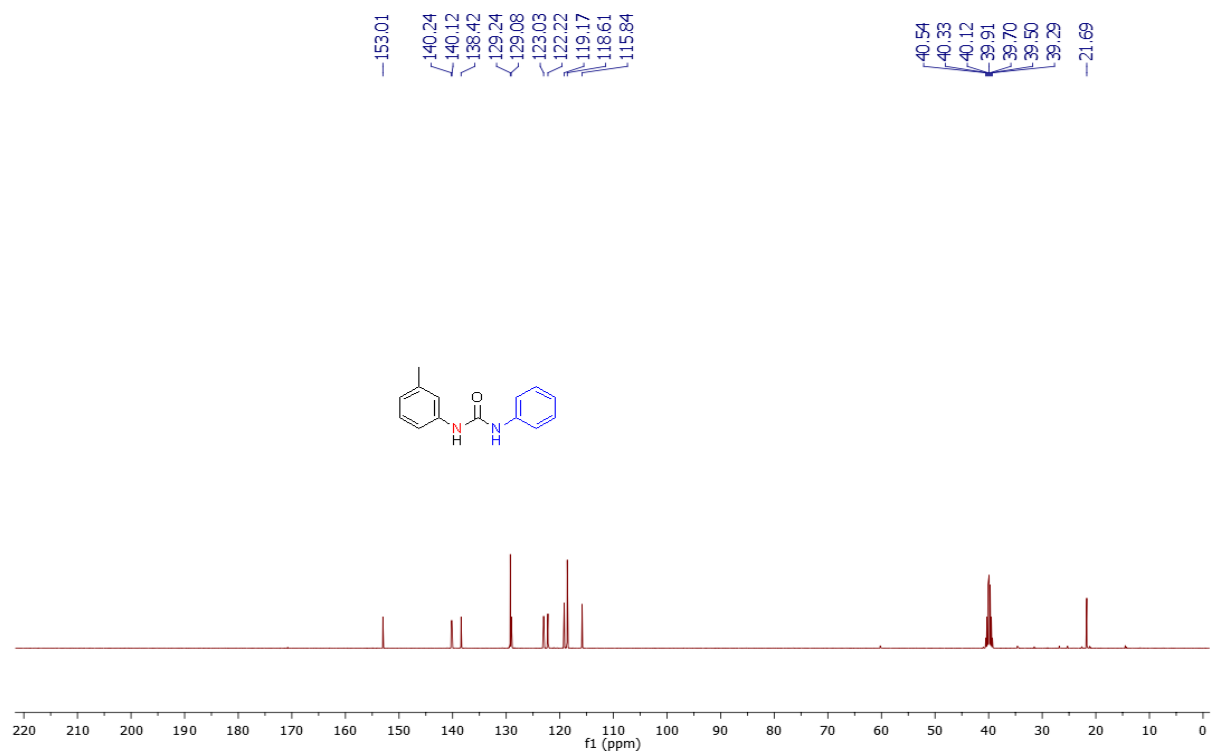

## DEPT of 1-phenyl-3-(*m*-tolyl)urea (3ai)

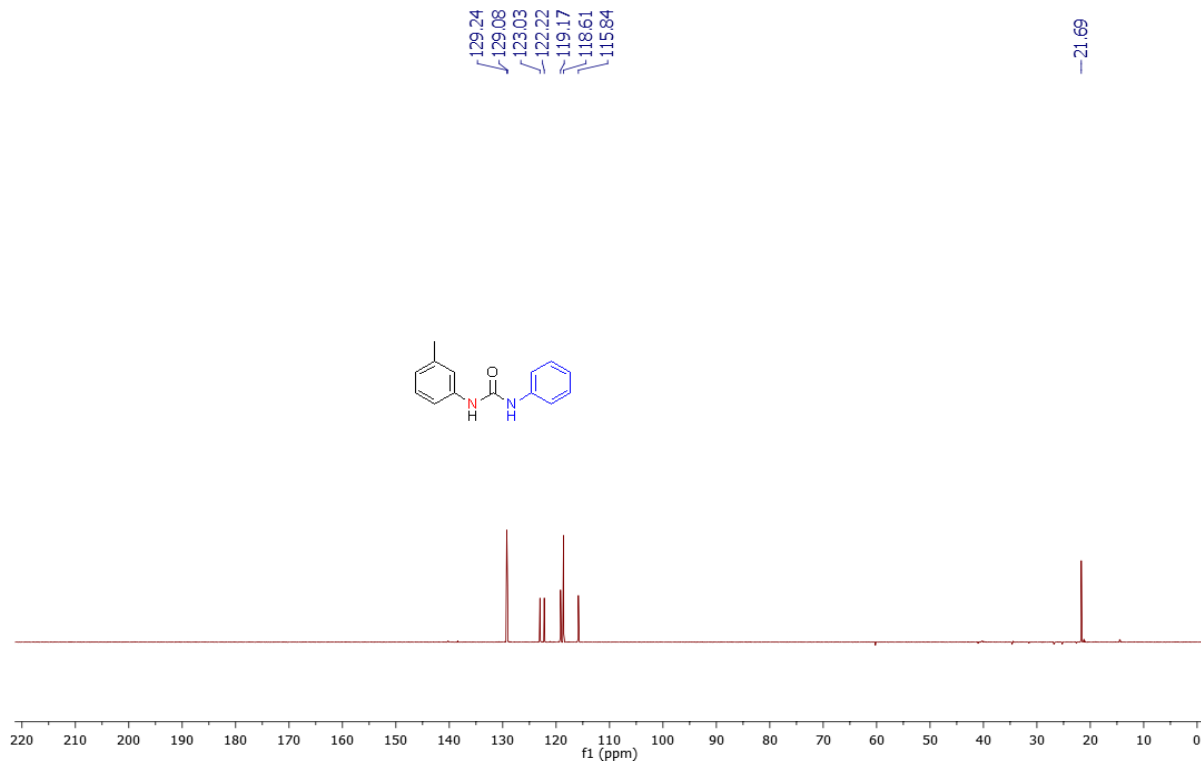

## HRMS of 1-phenyl-3-(*m*-tolyl)urea (3ai)

### Elemental Composition Report

#### Single Mass Analysis

Tolerance = 50.0 PPM / DBE: min = -1.5, max = 50.0

Element prediction: Off

Number of isotope peaks used for i-FIT = 3

Monoisotopic Mass, Even Electron Ions

15 formula(e) evaluated with 1 results within limits (up to 3 closest results for each mass)

Elements Used:

C: 0-14 H: 0-100 N: 0-2 O: 0-2

F-1

080422\_20 17 (0.363) Cm (17:18)

QMI DIVISION, CSIR-IIIM JAMMU  
Xevo G2-XS QTOF YFC2015

08-Apr-2022  
13:13:12  
1: TOF MS ES+  
6.41e+006

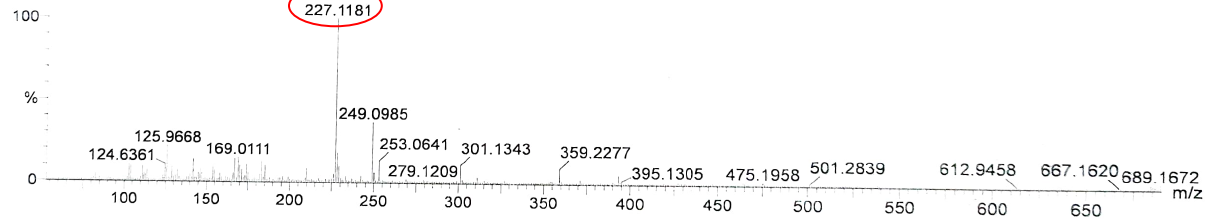

Minimum:

Maximum: 2.0 50.0 -1.5 50.0

| Mass     | Calc. Mass | mDa  | PPM  | DBE | i-FIT | Norm | Conf (%) | Formula                                          |
|----------|------------|------|------|-----|-------|------|----------|--------------------------------------------------|
| 227.1181 | 227.1184   | -0.3 | -1.3 | 8.5 | 59.9  | n/a  | n/a      | C <sub>14</sub> H <sub>15</sub> N <sub>2</sub> O |

### <sup>1</sup>H-NMR of 1-(5-chloro-2-methoxyphenyl)-3-phenylurea (3aj)

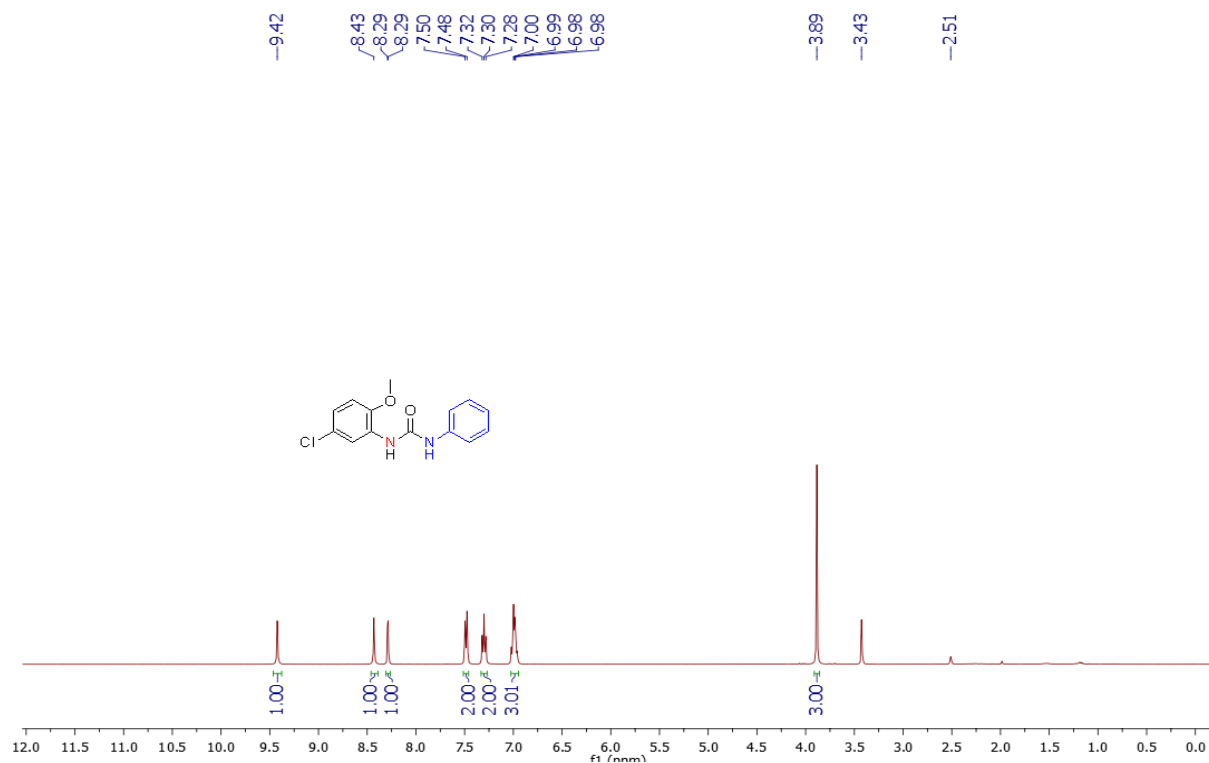

### <sup>13</sup>C-NMR of 1-(5-chloro-2-methoxyphenyl)-3-phenylurea (3aj)

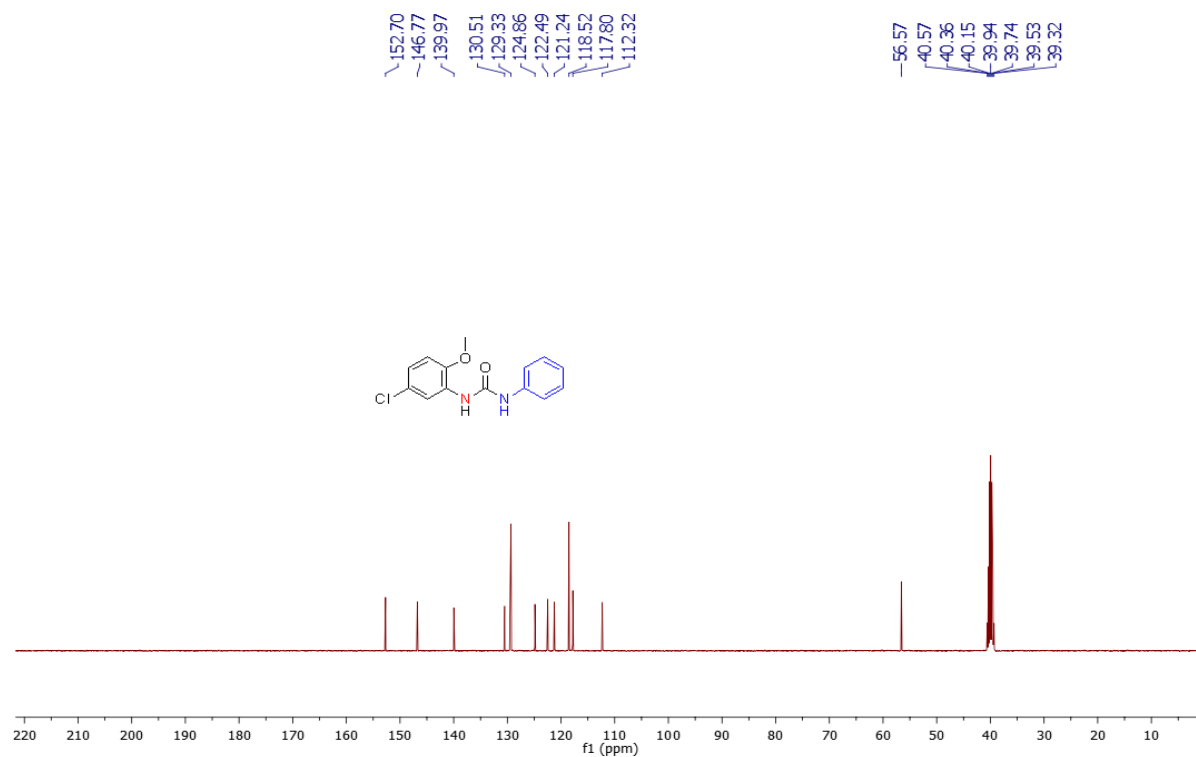

## DEPT of 1-(5-chloro-2-methoxyphenyl)-3-phenylurea (3aj)

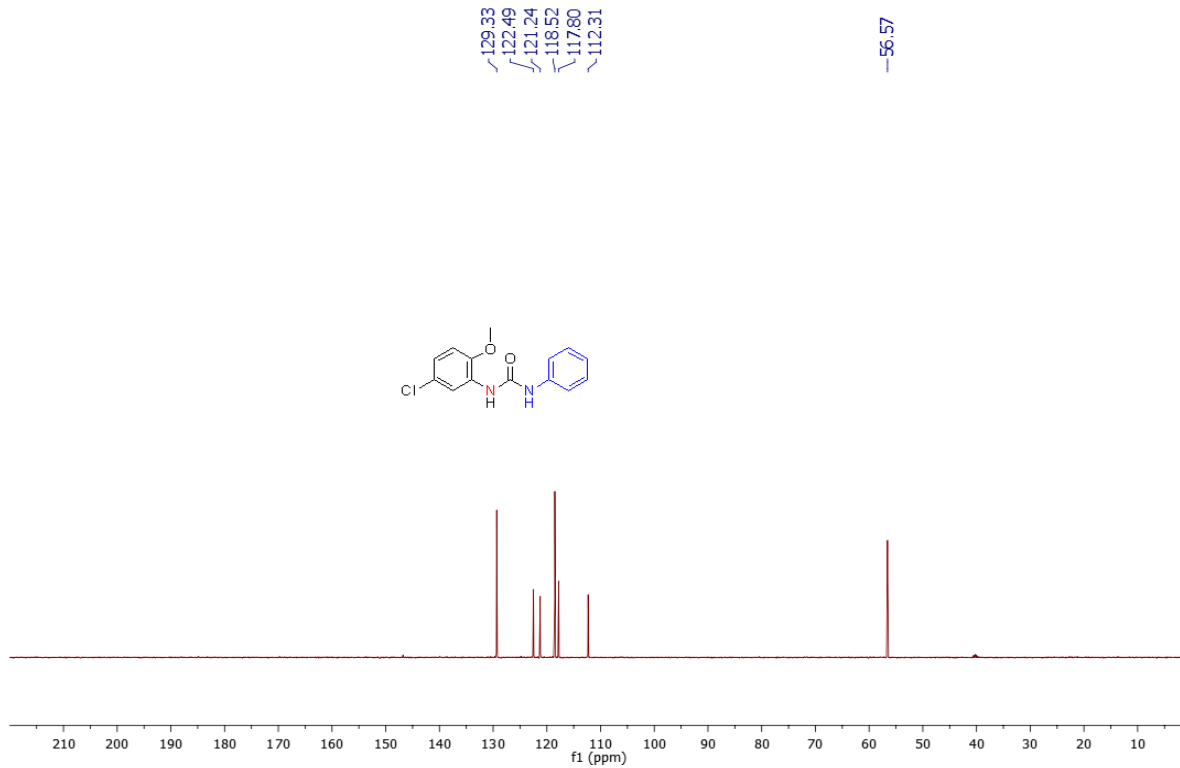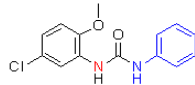

## HRMS of 1-(5-chloro-2-methoxyphenyl)-3-phenylurea (3aj)

### Elemental Composition Report

#### Single Mass Analysis

Tolerance = 50.0 PPM / DBE: min = -1.5, max = 50.0

Element prediction: Off

Number of isotope peaks used for i-FIT = 3

Monoisotopic Mass, Even Electron Ions

19 formula(e) evaluated with 1 results within limits (up to 3 closest results for each mass)

Elements Used:

C: 0-14 H: 0-100 N: 0-2 O: 0-2 Cl: 0-1

F: 3

QMI DIVISION, CSIR-IIIM JAMMU  
Xevo G2-XS QTOF YFC2015

08-Apr-2022

13:10:38

1: TOF MS ES+

4.59e+007

080422\_19 6 (0.138)

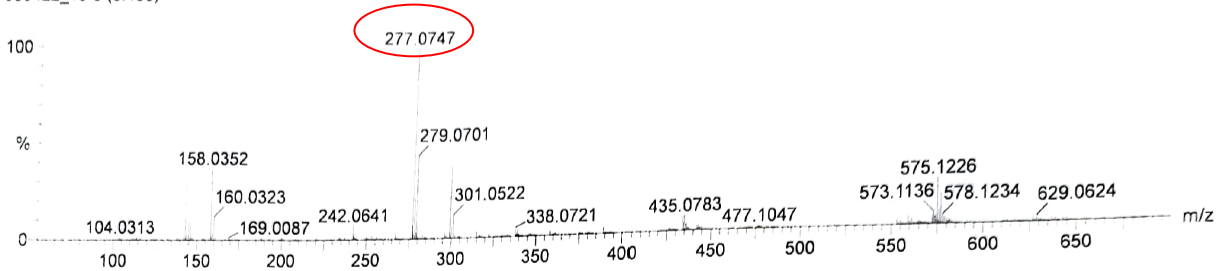

Minimum: -1.5  
Maximum: 2.0 50.0 50.0

| Mass     | Calc. Mass | mDa | PPM | DBE | i-FIT  | Norm | Conf (%) | Formula          |
|----------|------------|-----|-----|-----|--------|------|----------|------------------|
| 277.0747 | 277.0744   | 0.3 | 1.1 | 8.5 | 1377.4 | n/a  | n/a      | C14 H14 N2 O2 Cl |

### <sup>1</sup>H-NMR of 1-phenyl-3-undecylurea (3ak)

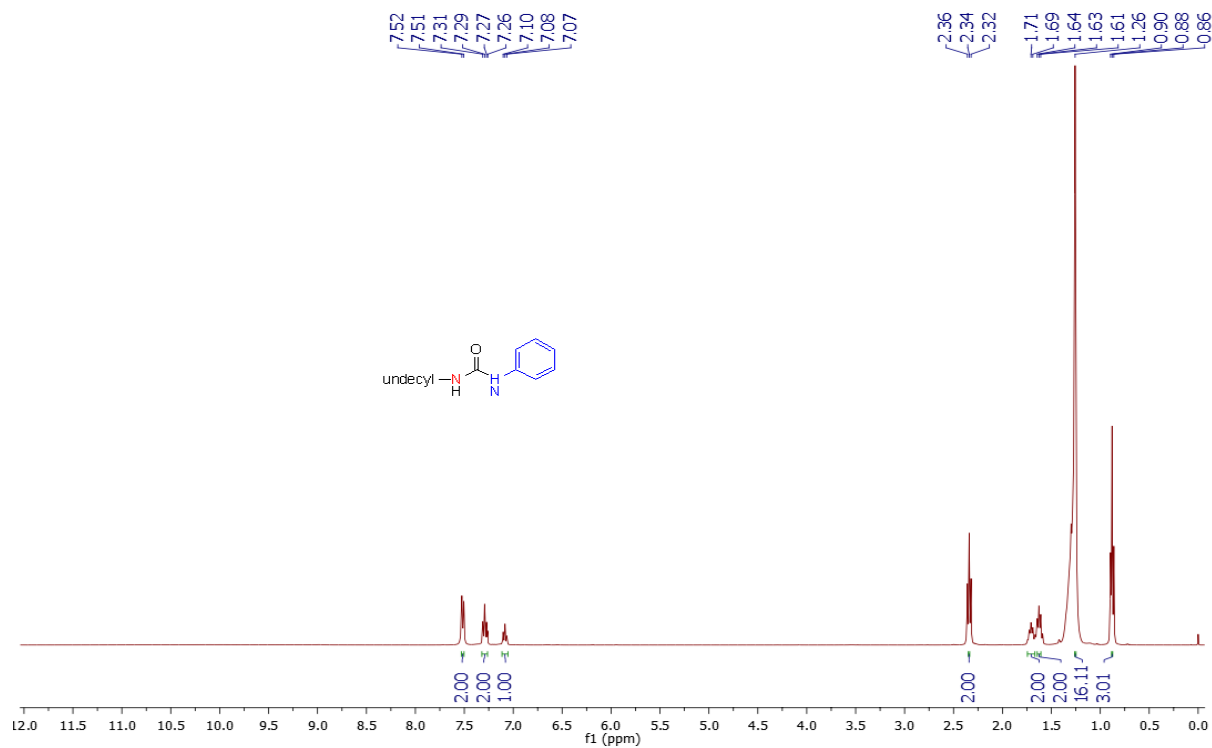

### <sup>13</sup>C-NMR of 1-phenyl-3-undecylurea (3ak)

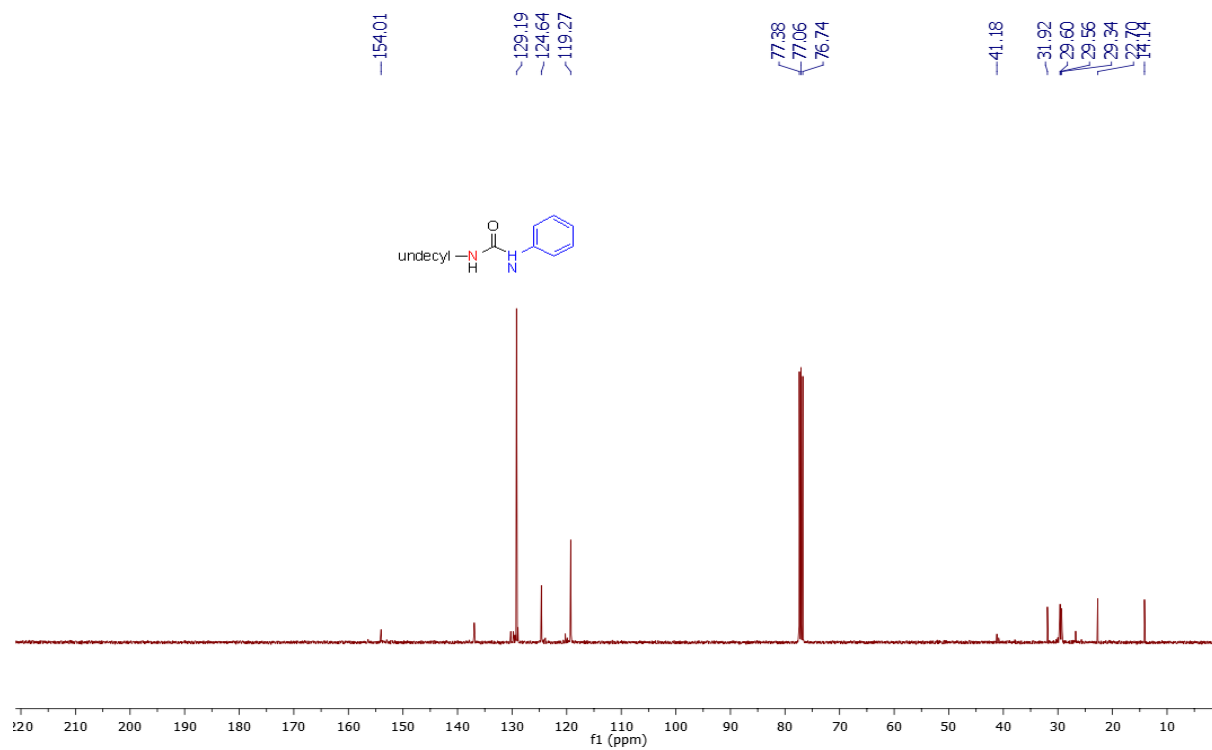



## DEPT of 1-phenyl-3-undecylurea (3ak)

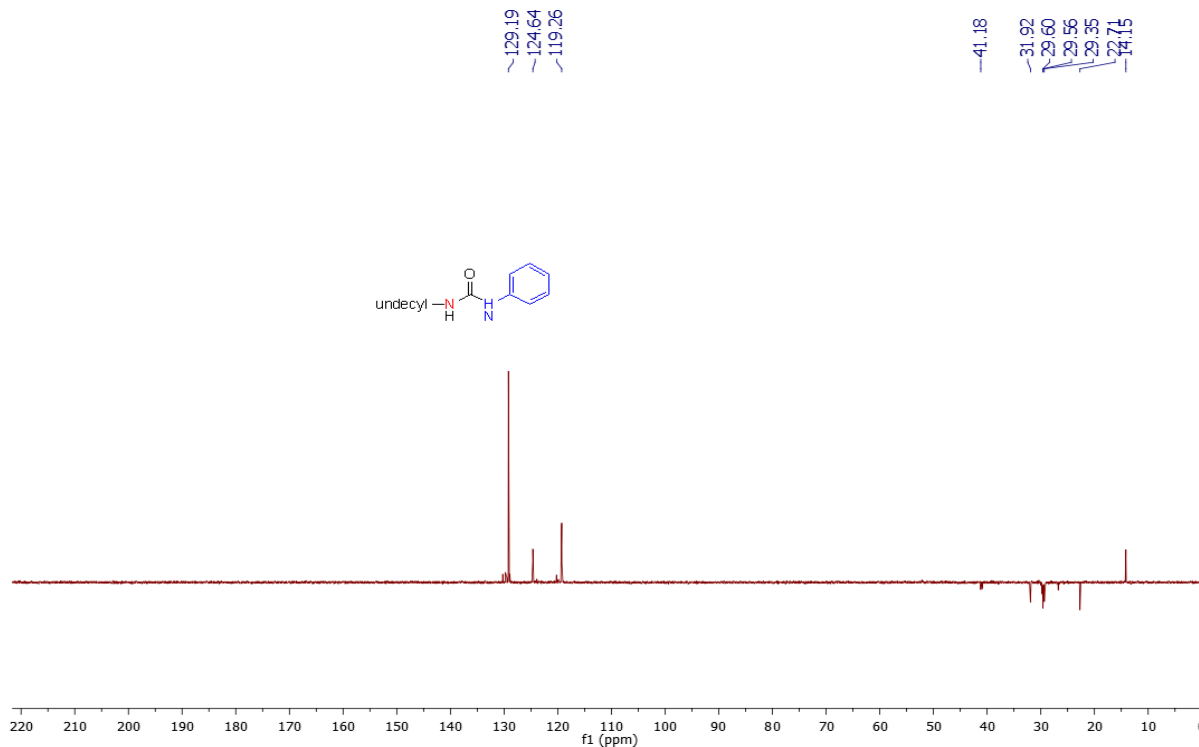

## HRMS of 1-phenyl-3-undecylurea (3ak)

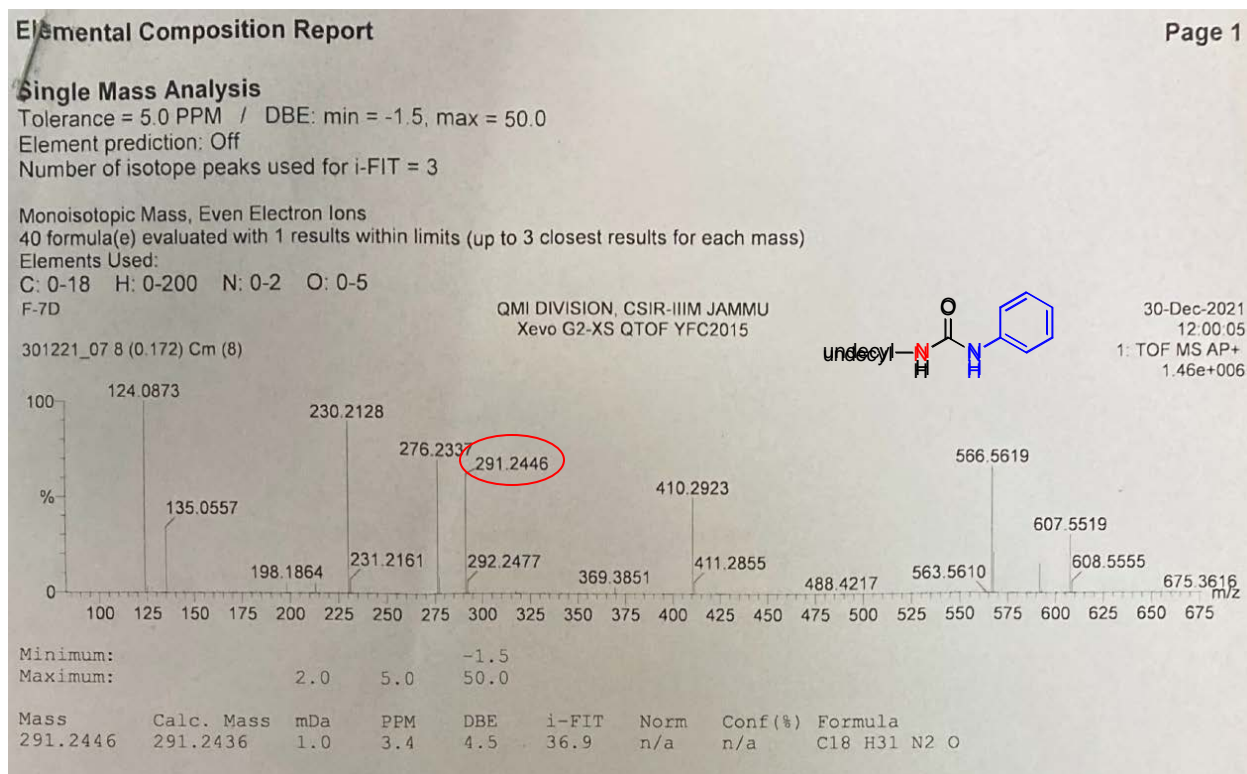

### <sup>1</sup>H-NMR of 1-(3-bromo-4-methylphenyl)-3-undecylurea (3a)

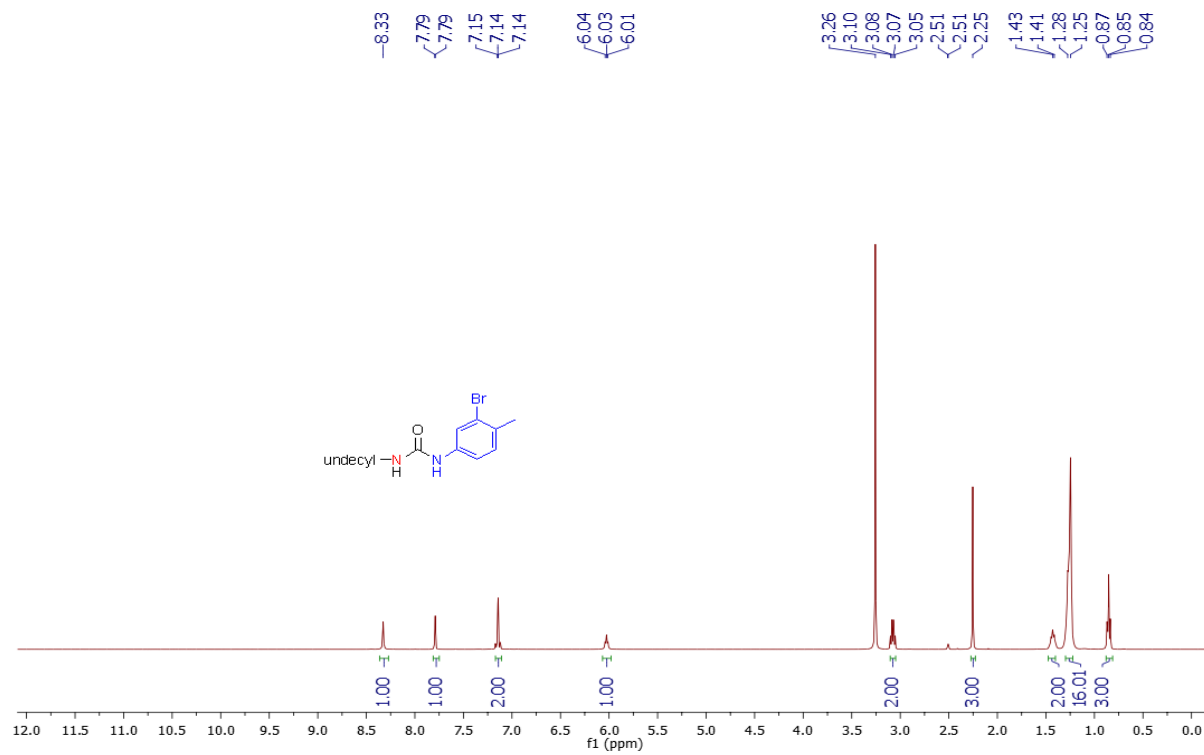

### <sup>13</sup>C-NMR of 1-(3-bromo-4-methylphenyl)-3-undecylurea (3a)

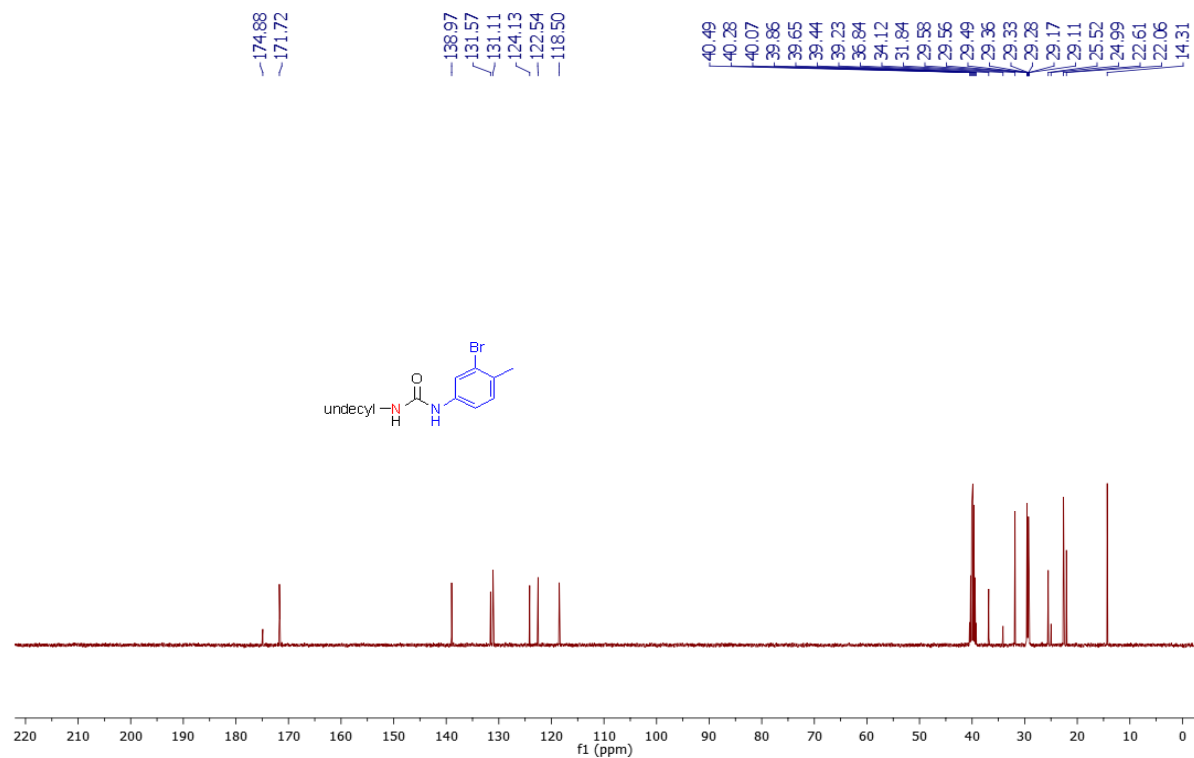

# DEPT of 1-(3-bromo-4-methylphenyl)-3-undecylurea (3al)

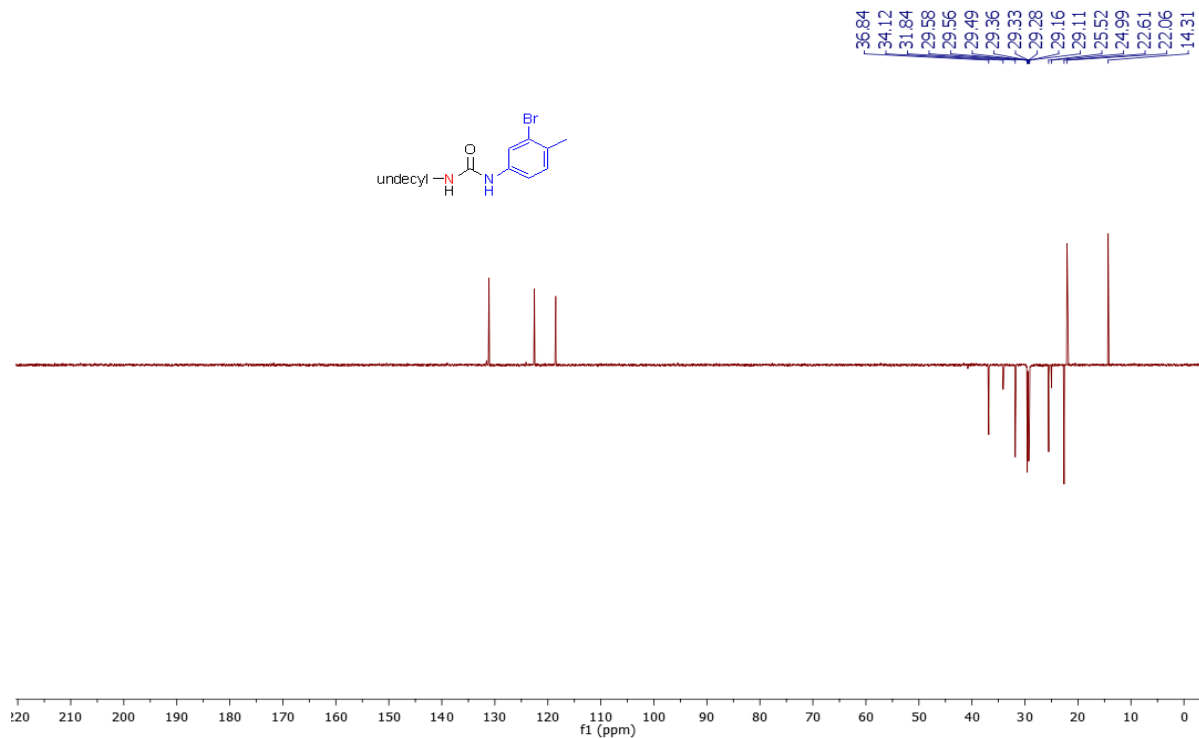

# Mass spectra of 1-(3-bromo-4-methylphenyl)-3-undecylurea (3a)

## Sample Information

|                  |                              |              |                              |
|------------------|------------------------------|--------------|------------------------------|
| Sample Name      | : F5                         | Sample ID    | :                            |
| Tray#            | : 1                          | Vial#        | : 30                         |
| Injection Volume | : 0.3                        | Data File    | : 30-03-22 NEHARIKA CS37.lcd |
| Method File      | : MASS SCANN 13APRIL2021.lcm | Processed by | : System Administrator       |
| Date Processed   | : 3/30/2022 12:57:50 PM      |              |                              |

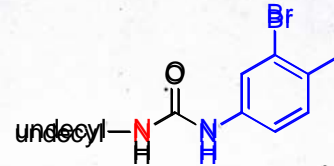

MS Spectrum

BG Mode: Averaged 0.000-0.508(1-31) End of Segment 1 - Event 1

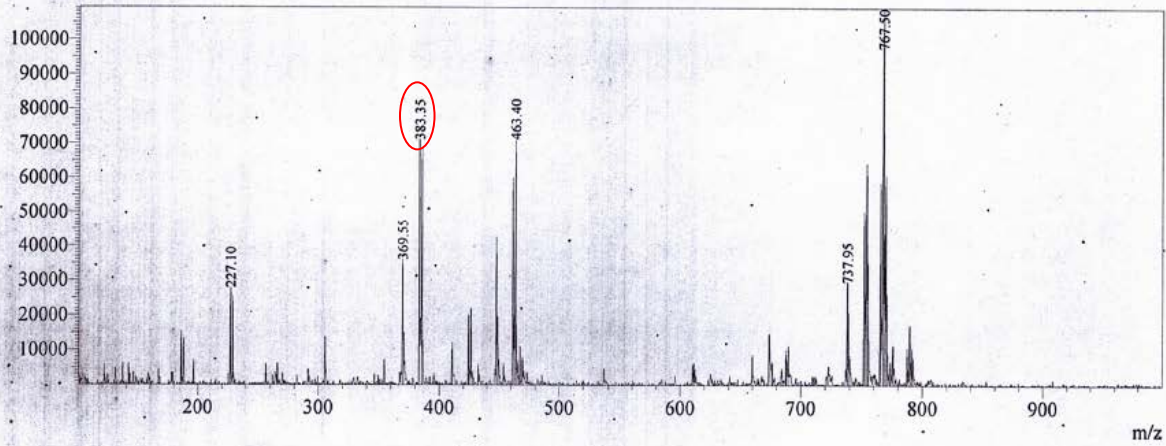

BG Mode: Averaged 0.017-0.524(2-32) End of Segment 1 - Event 2

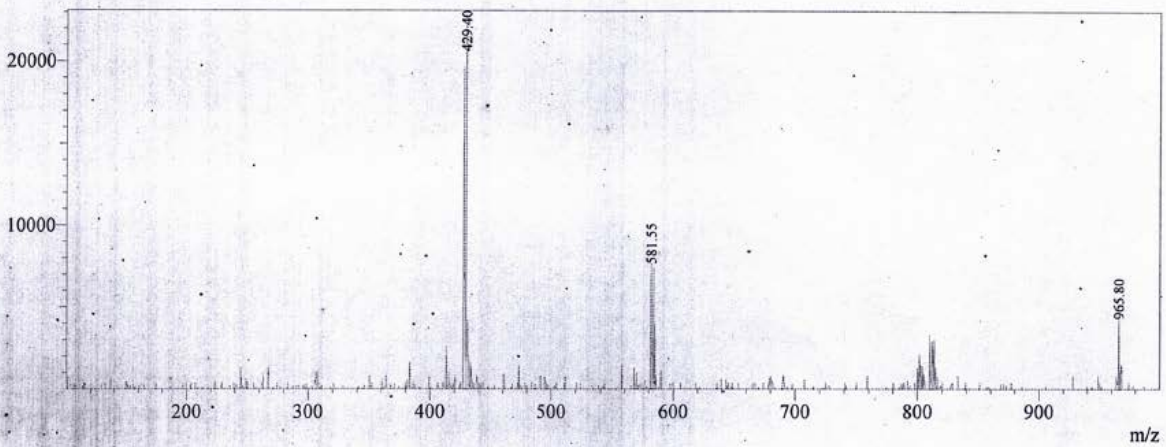

### <sup>1</sup>H-NMR of (*E*)-1-phenyl-3-styrylurea (3am)

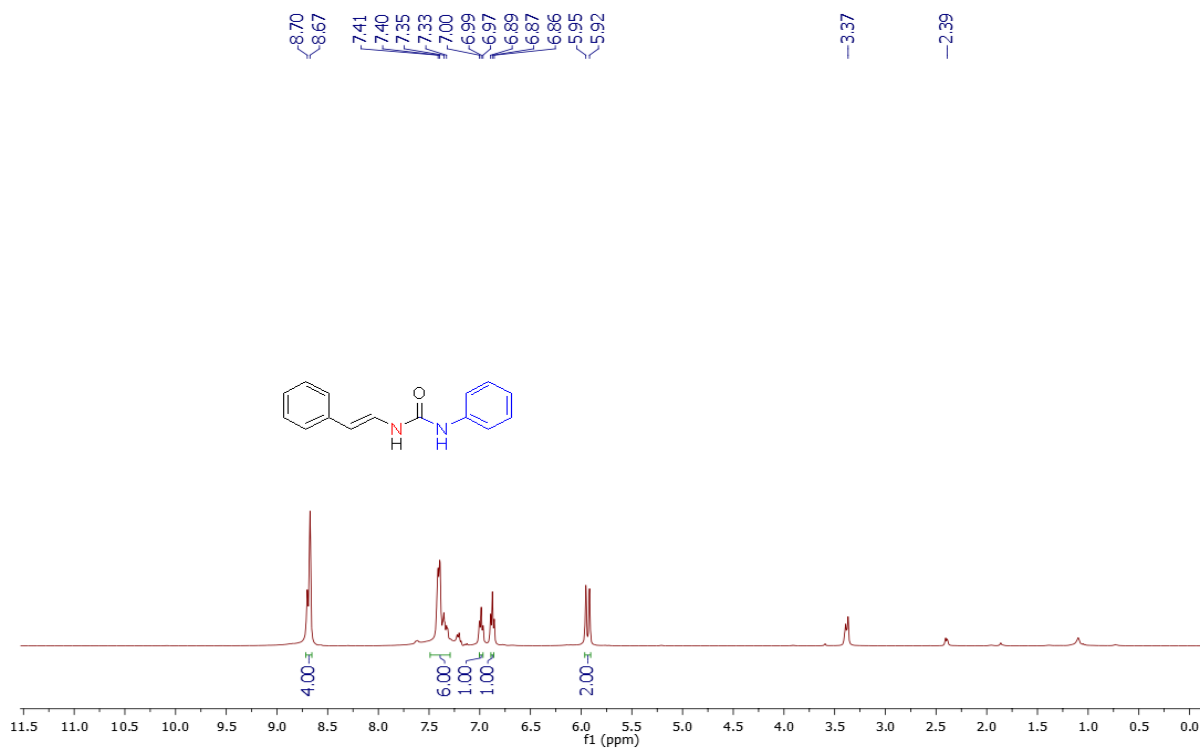

### <sup>13</sup>C-NMR of (*E*)-1-phenyl-3-styrylurea (3am)

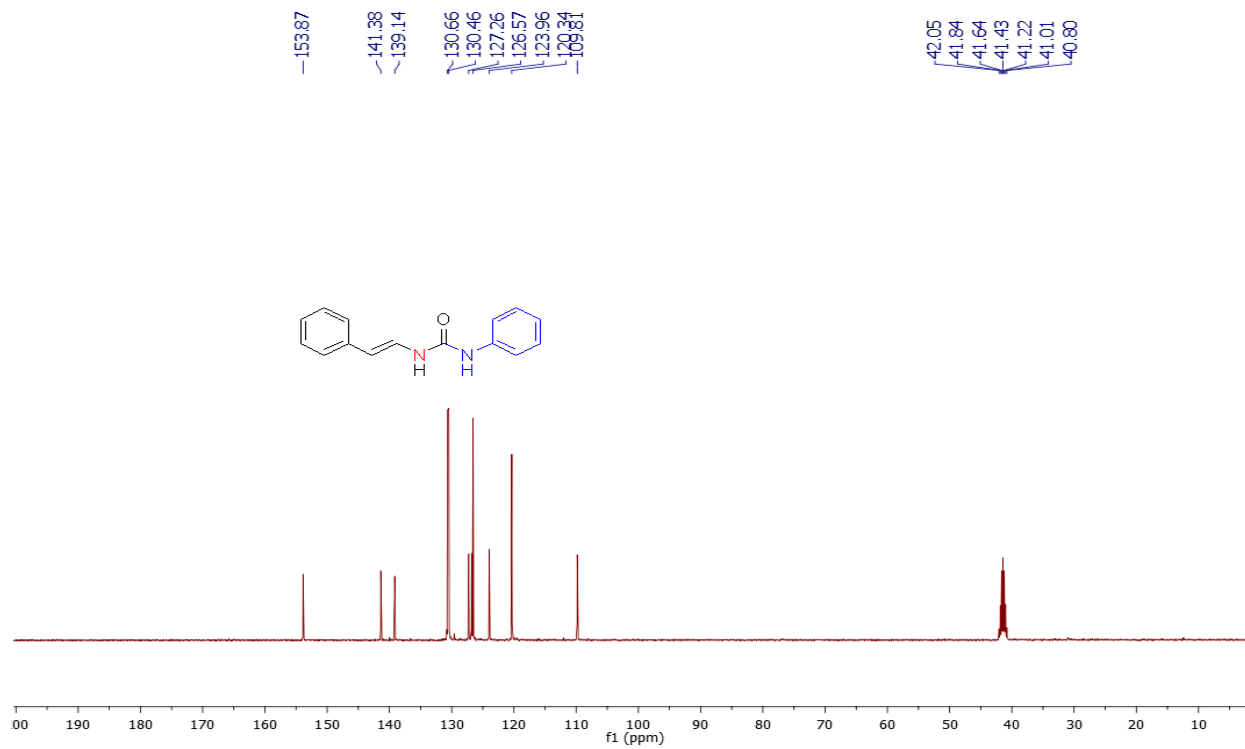

## DEPT of (*E*)-1-phenyl-3-styrylurea (3am)

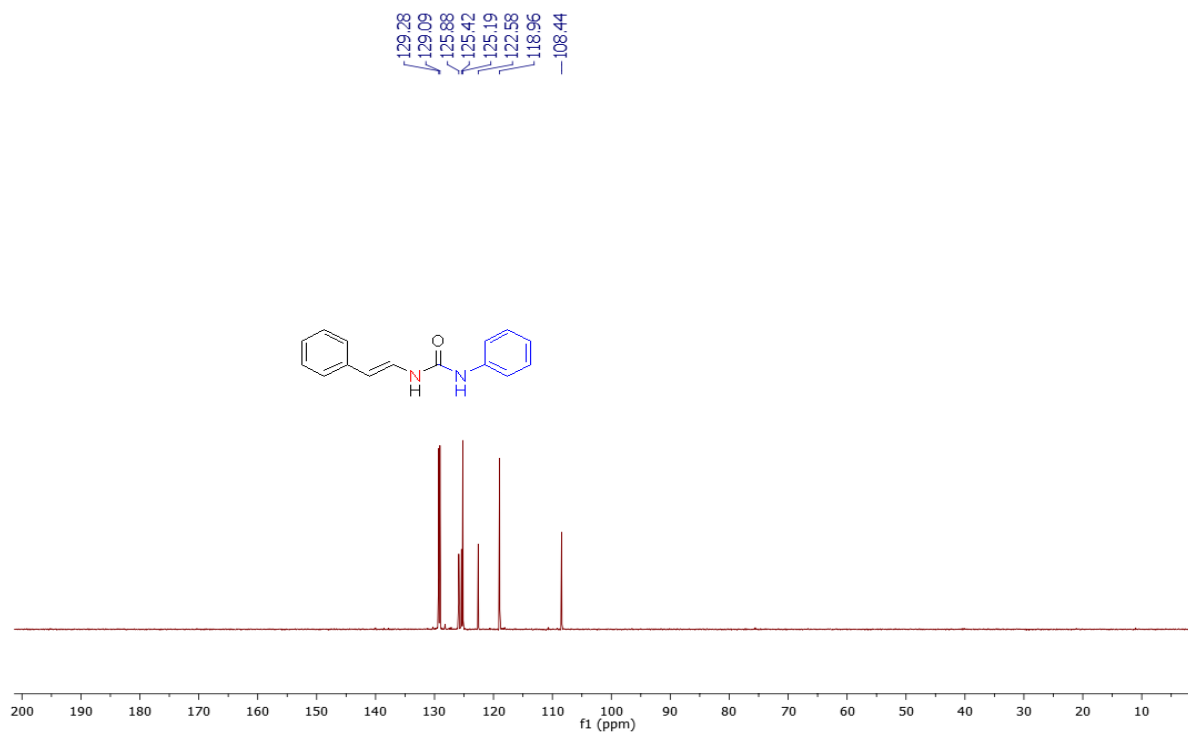

## HRMS of (*E*)-1-phenyl-3-styrylurea (3am)

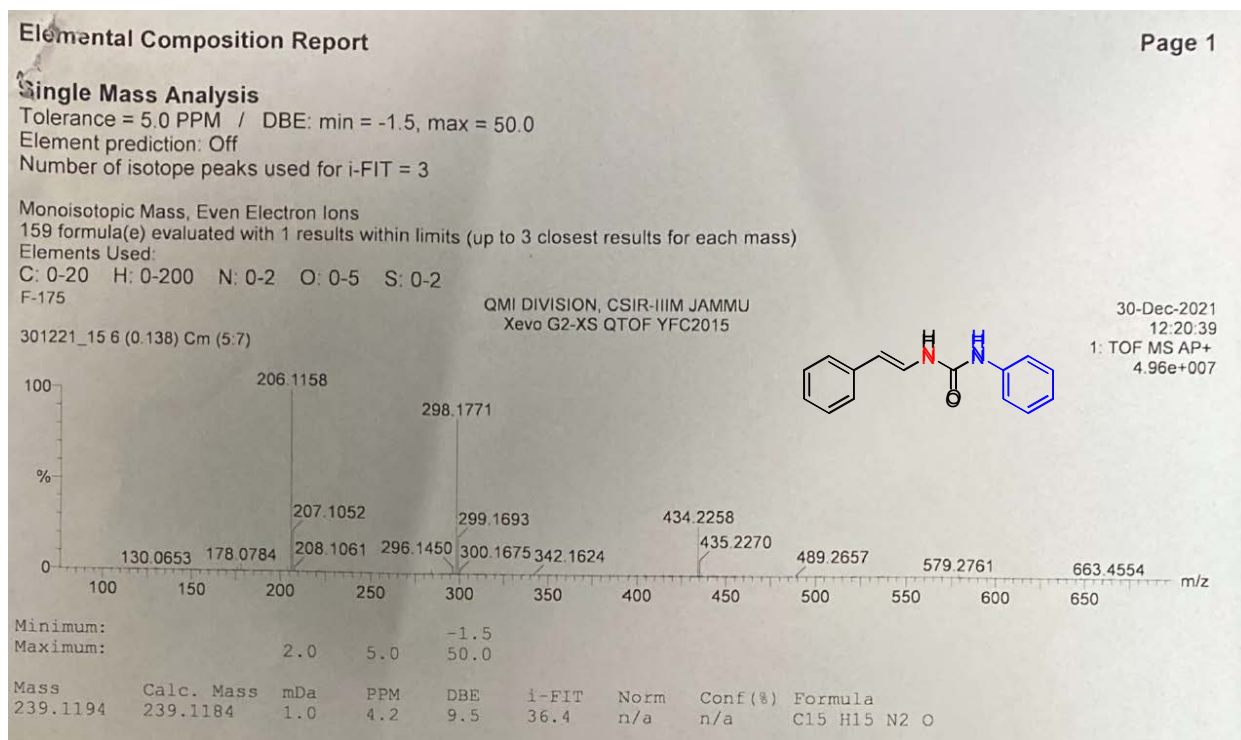

### <sup>1</sup>H-NMR of (*E*)-1-hexadecyl-3-styrylurea (3an)

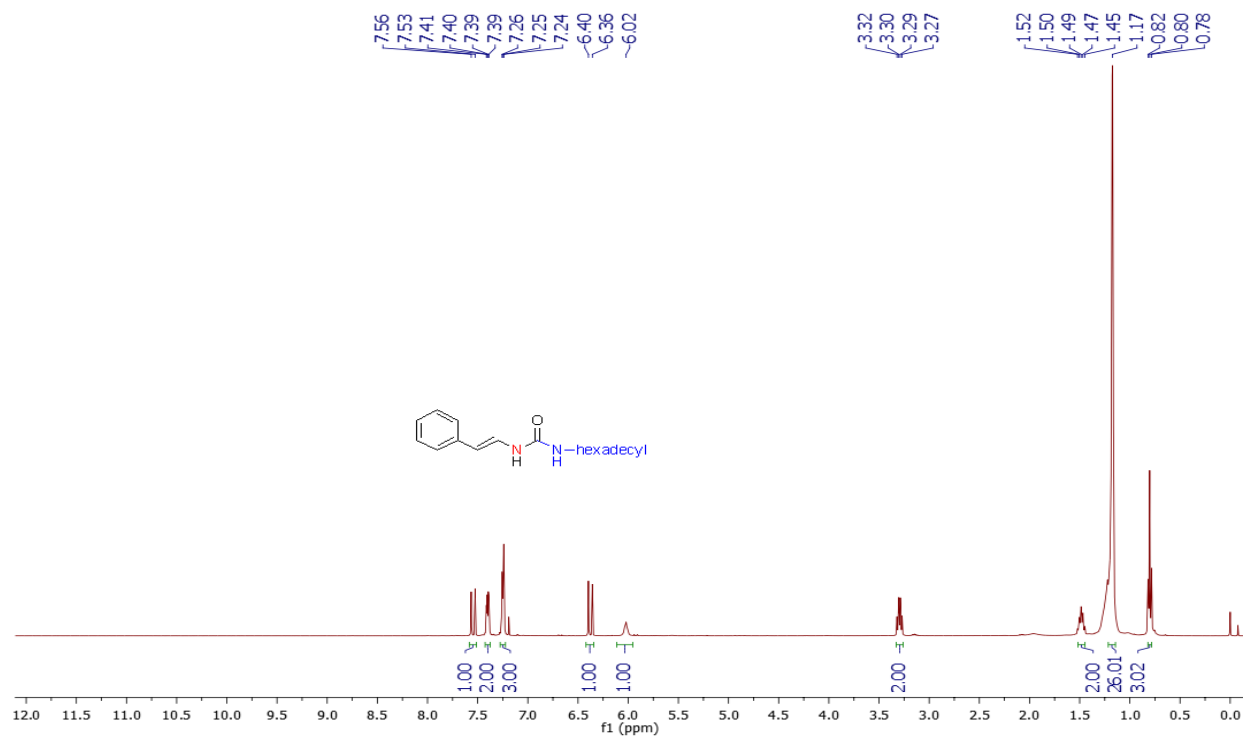

### <sup>13</sup>C-NMR of (*E*)-1-hexadecyl-3-styrylurea (3an)

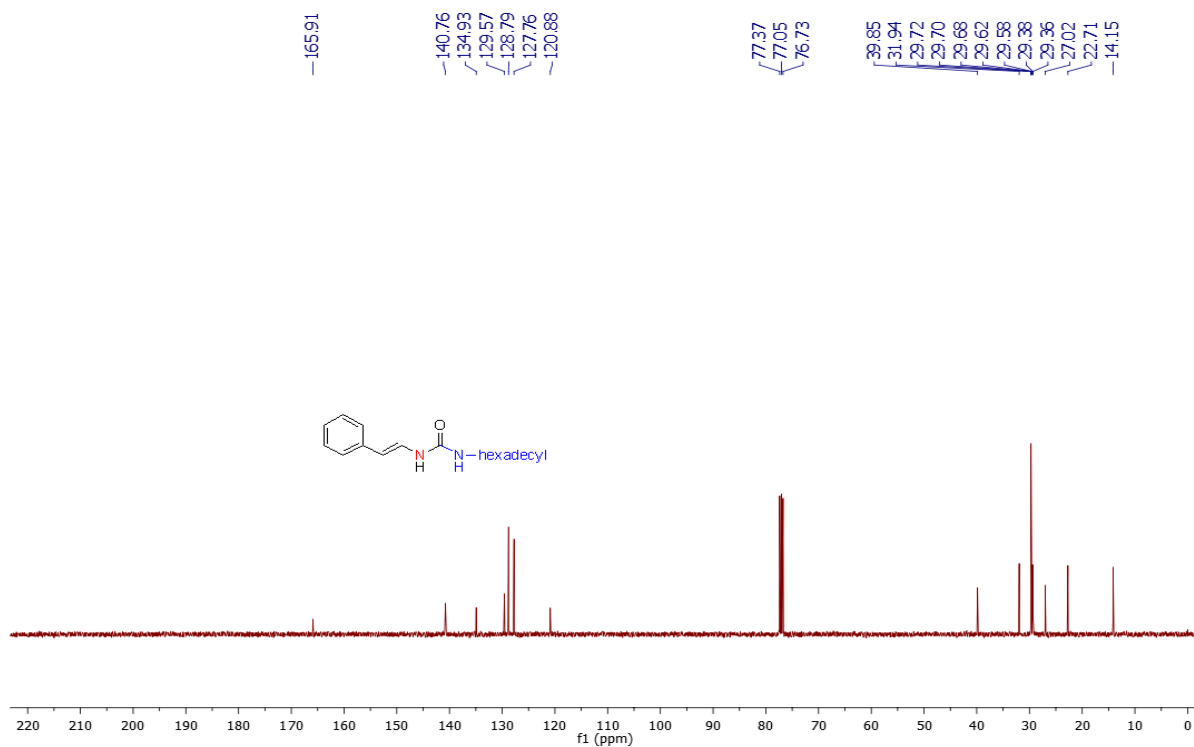

DEPT of of (*E*)-1-hexadecyl-3-styrylurea (3an)

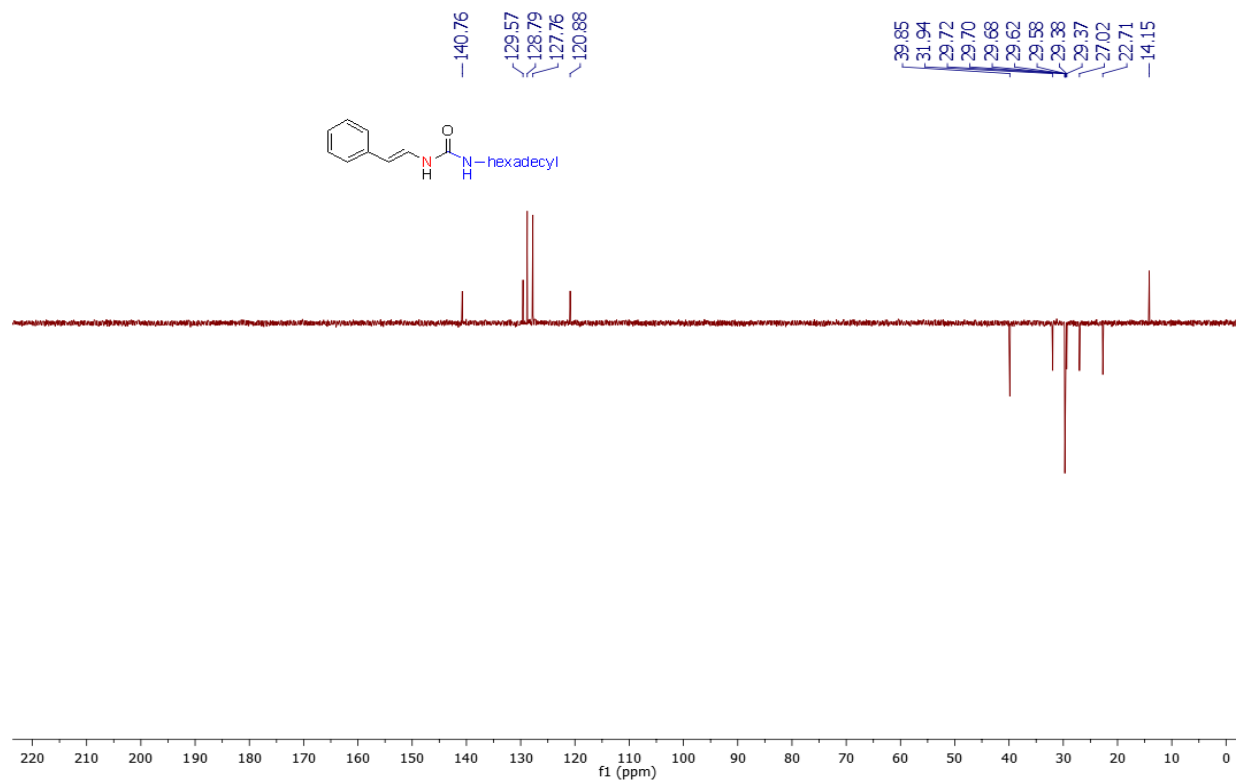

<sup>1</sup>H-NMR of (*E*)-1-(pyrimidin-2-yl)-3-styrylurea (3ao)

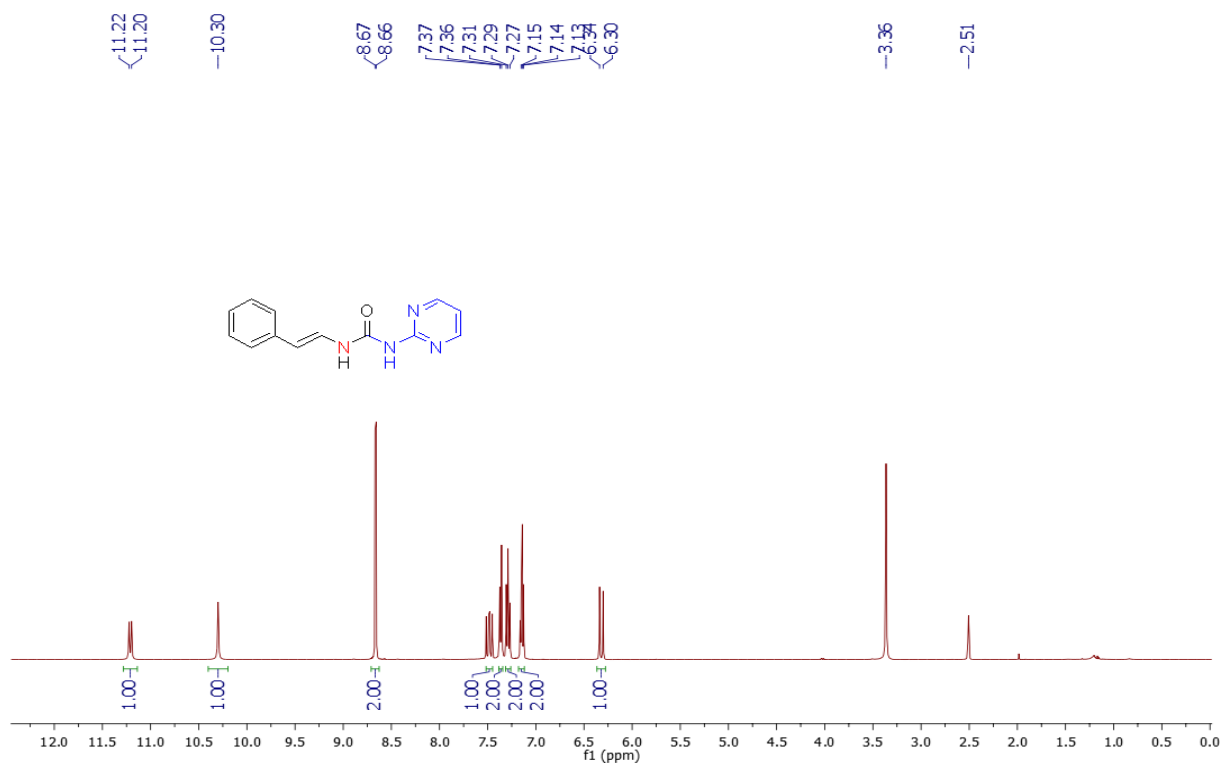



### <sup>13</sup>C-NMR of (*E*)-1-(pyrimidin-2-yl)-3-styrylurea (3ao)

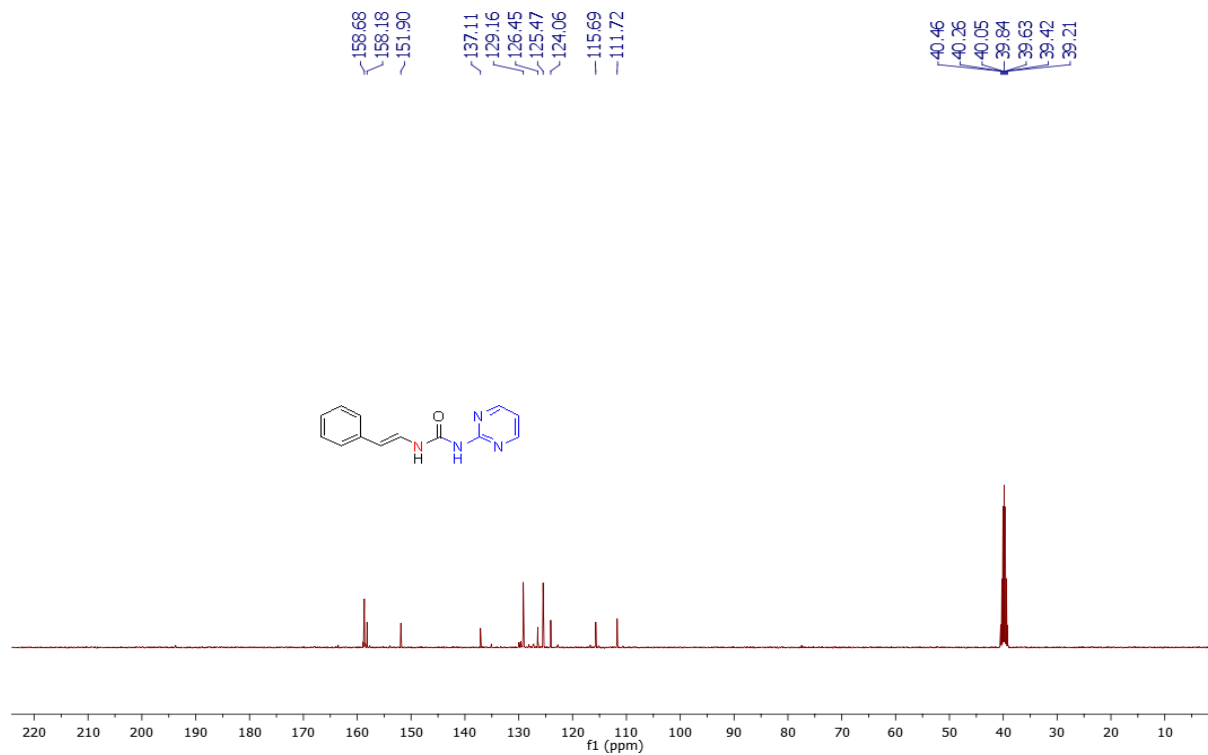

### DEPT of (*E*)-1-(pyrimidin-2-yl)-3-styrylurea (3ao)

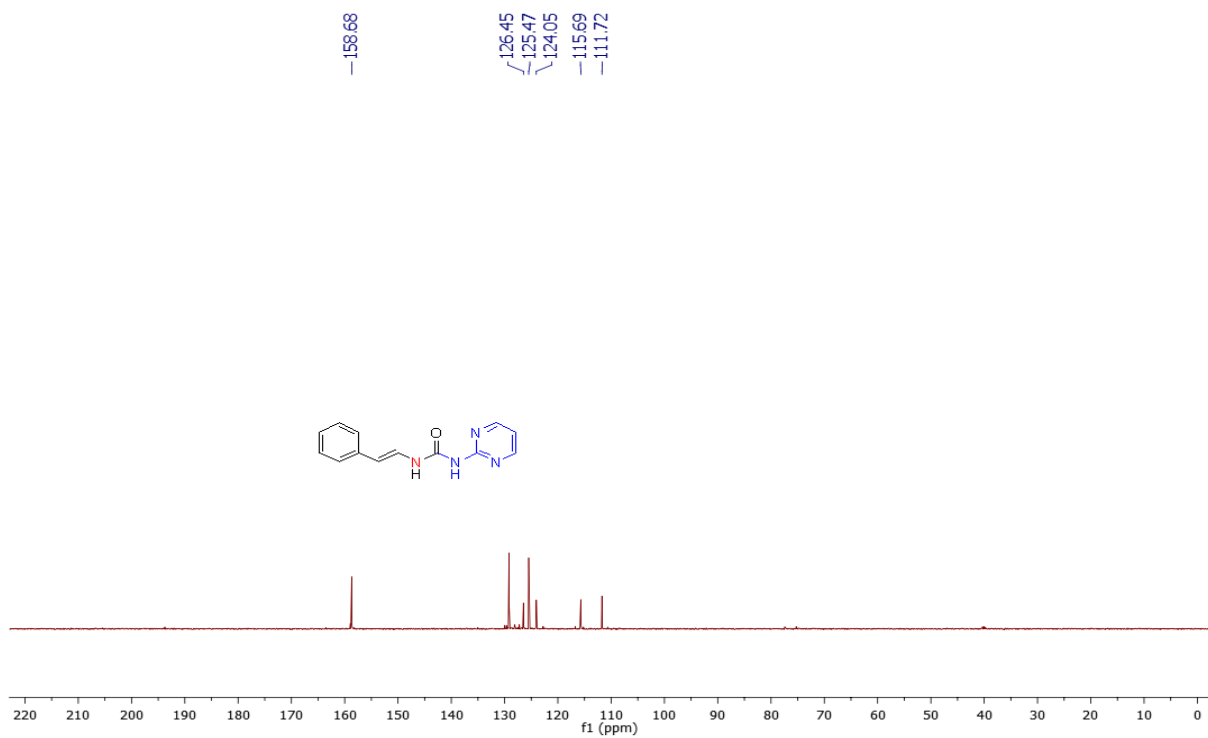

# HRMS of (*E*)-1-(pyrimidin-2-yl)-3-styrylurea (3ao)

## Elemental Composition Report

Page 1

### Single Mass Analysis

Tolerance = 5.0 PPM / DBE: min = -1.5, max = 50.0

Element prediction: Off

Number of isotope peaks used for i-FIT = 3

Monoisotopic Mass, Even Electron Ions

13 formula(e) evaluated with 1 results within limits (up to 3 closest results for each mass)

Elements Used:

C: 0-13 H: 0-200 N: 0-4 O: 0-1

F-176

281221\_33 9 (0.208) Cm (9)

QMI DIVISION, CSIR-IIIM JAMMU  
Xevo G2-XS QTOF YFC2015

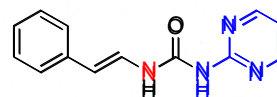

28-Dec-2021  
13:46:03  
1: TOF MS ES+  
9.26e+005

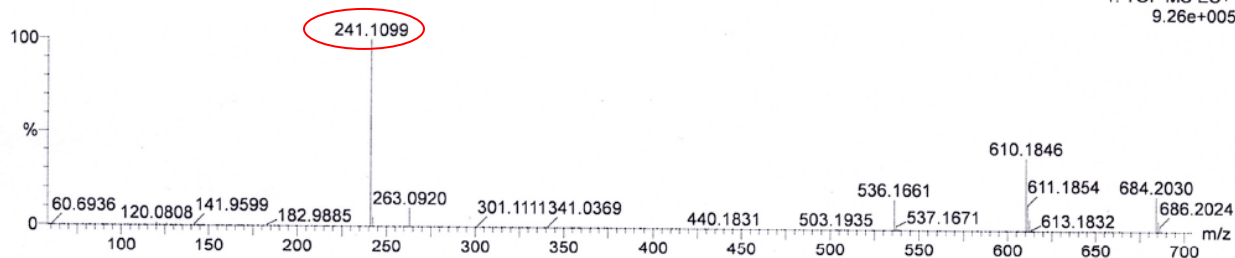

Minimum: -1.5  
Maximum: 2.0 5.0 50.0

| Mass     | Calc. Mass | mDa | PPM | DBE | i-FIT | Norm | Conf (%) | Formula      |
|----------|------------|-----|-----|-----|-------|------|----------|--------------|
| 241.1099 | 241.1089   | 1.0 | 4.1 | 9.5 | 35.4  | n/a  | n/a      | C13 H13 N4 O |

## <sup>1</sup>H-NMR of phenyl (4-cyanophenyl)carbamate (4a)

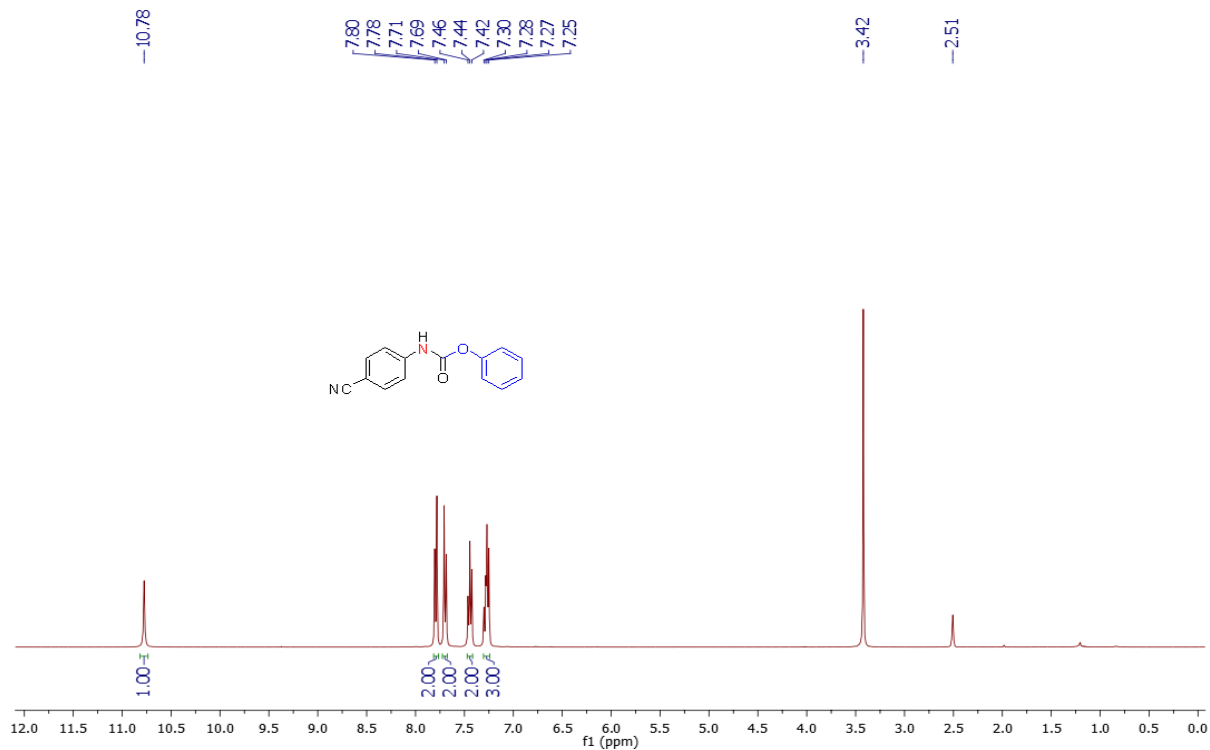

### <sup>13</sup>C-NMR of phenyl (4-cyanophenyl)carbamate (4a)

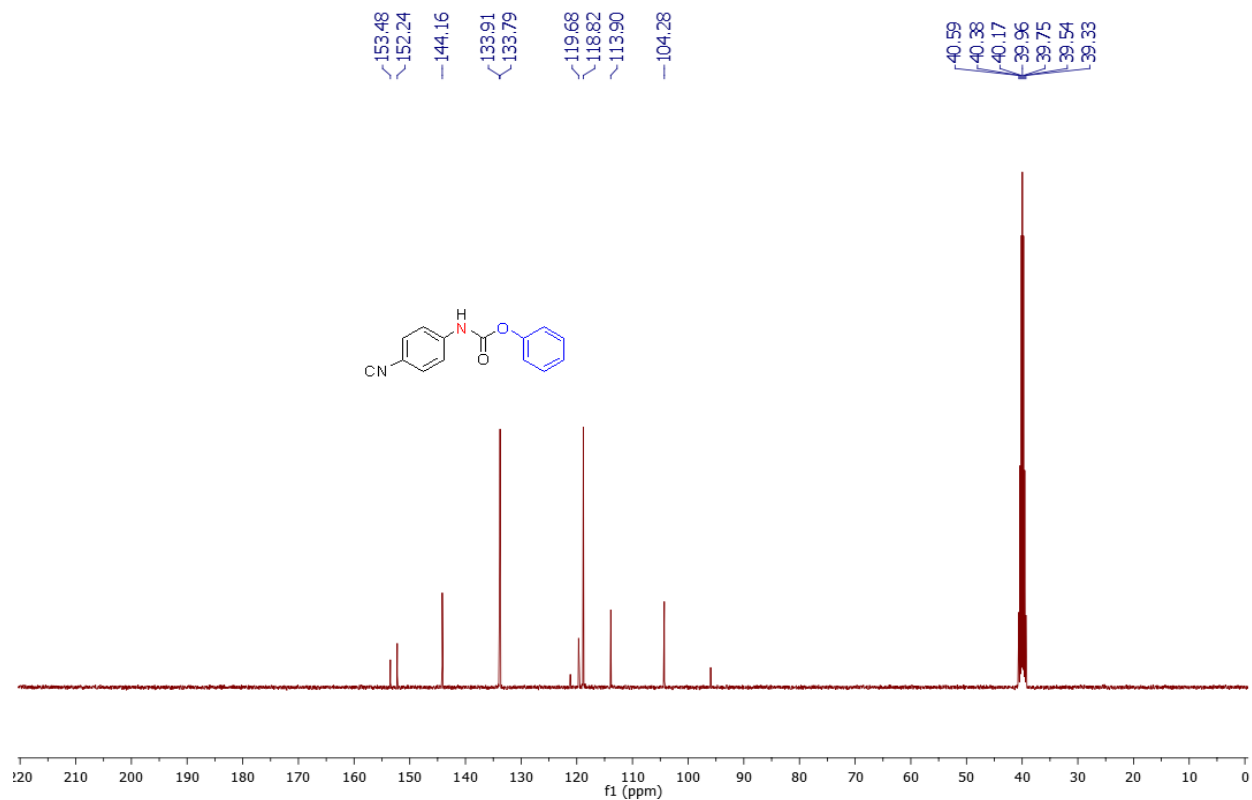

### DEPT of phenyl (4-cyanophenyl)carbamate (4a)

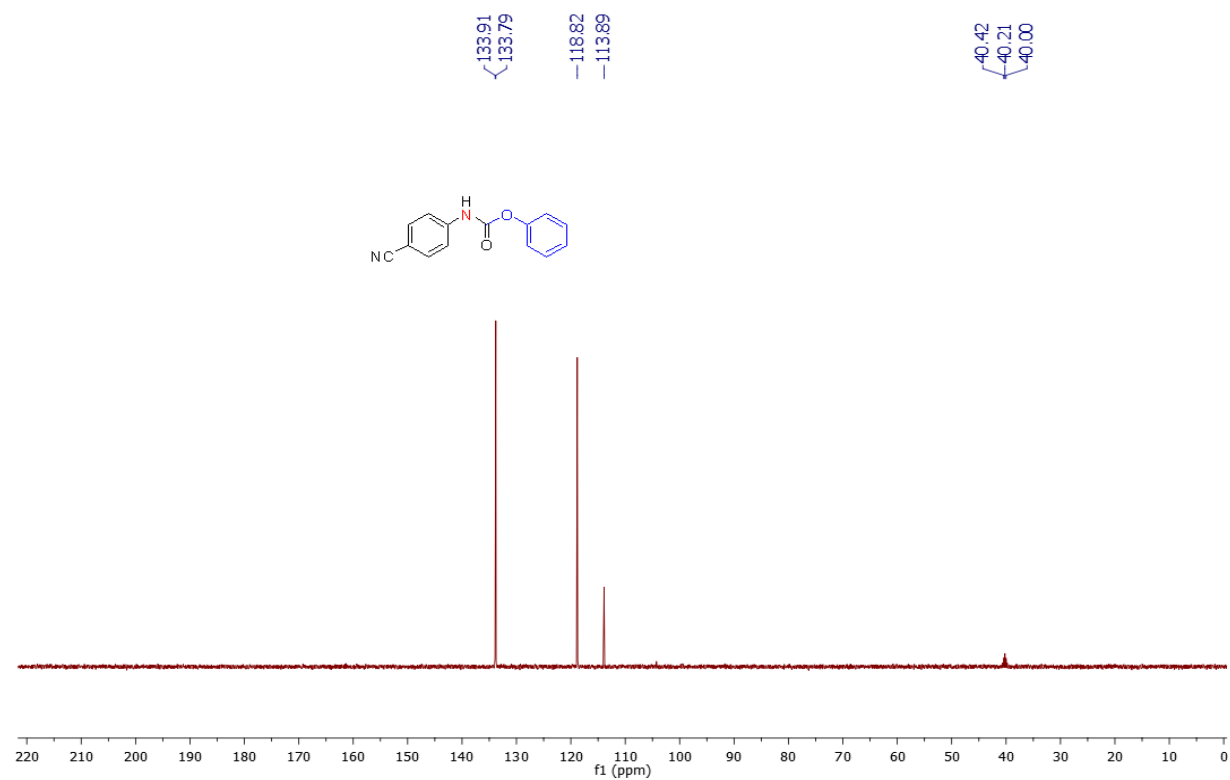

### <sup>1</sup>H-NMR of 4-(trifluoromethoxy)phenyl (4-methoxyphenyl)carbamate (4b)

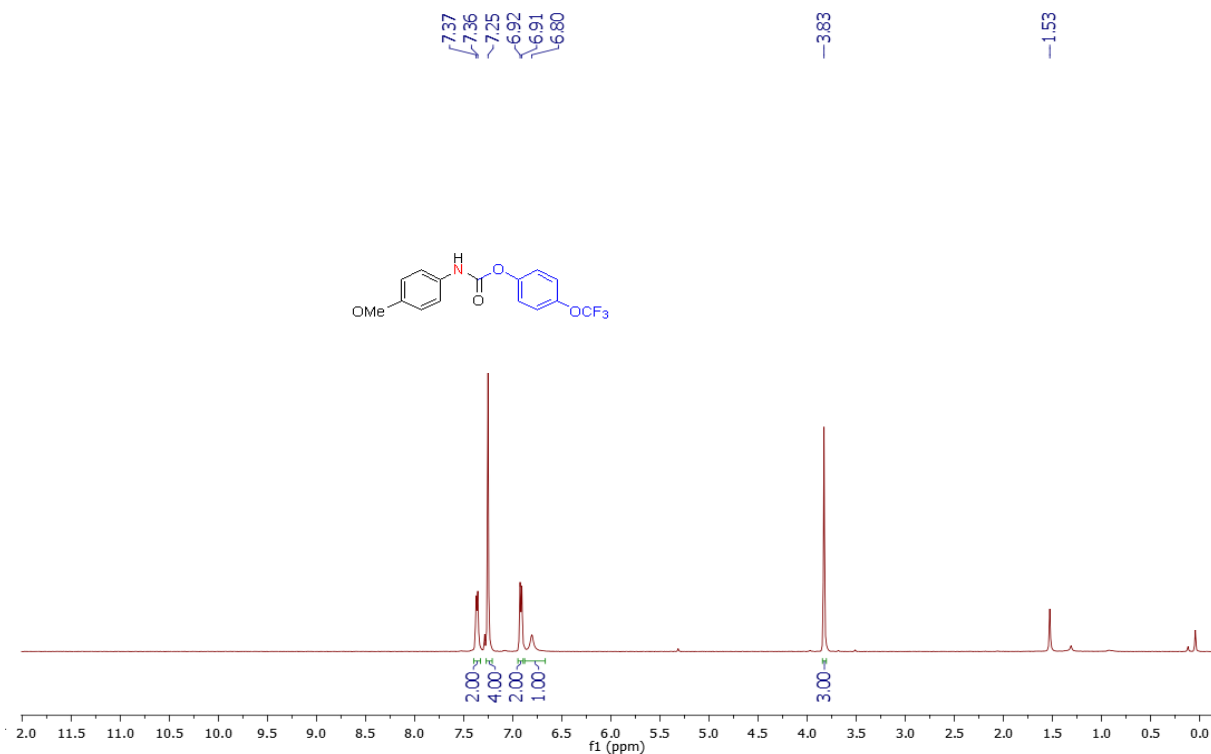

### <sup>13</sup>C-NMR of 4-(trifluoromethoxy)phenyl (4-methoxyphenyl)carbamate (4b)

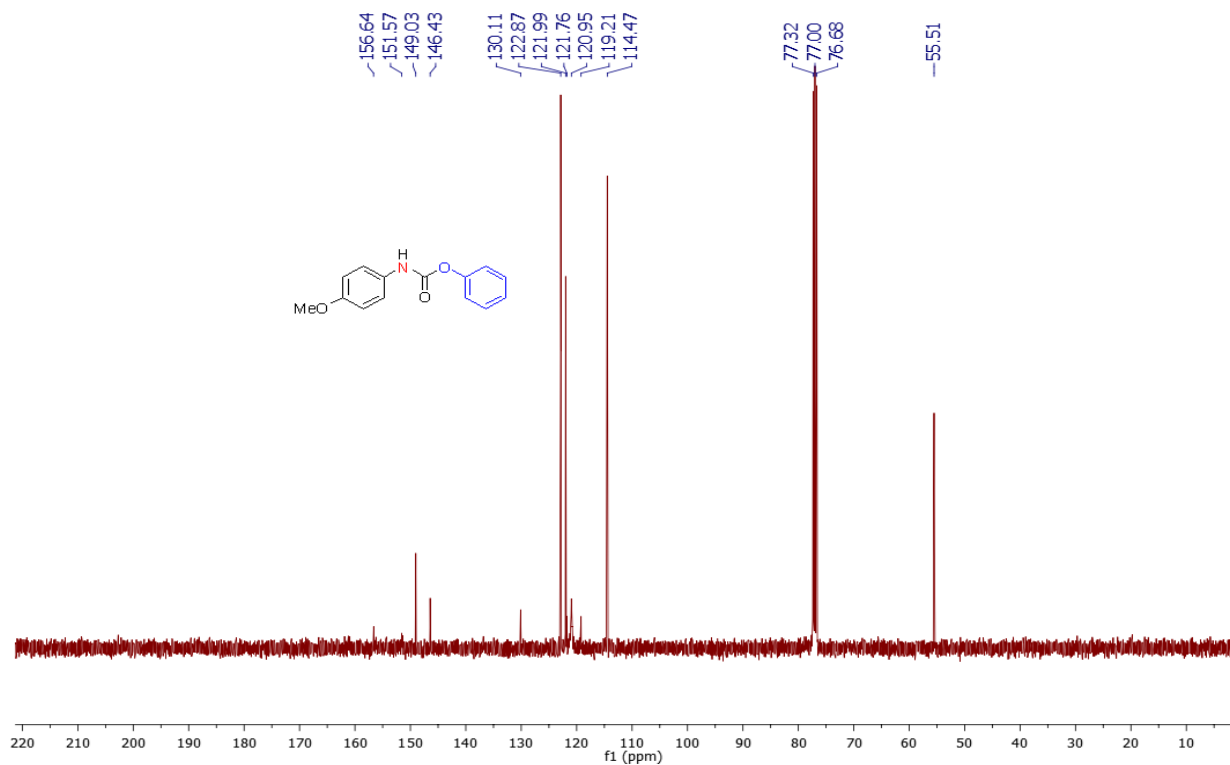

# DEPT of 4-(trifluoromethoxy)phenyl (4-methoxyphenyl)carbamate (4b)

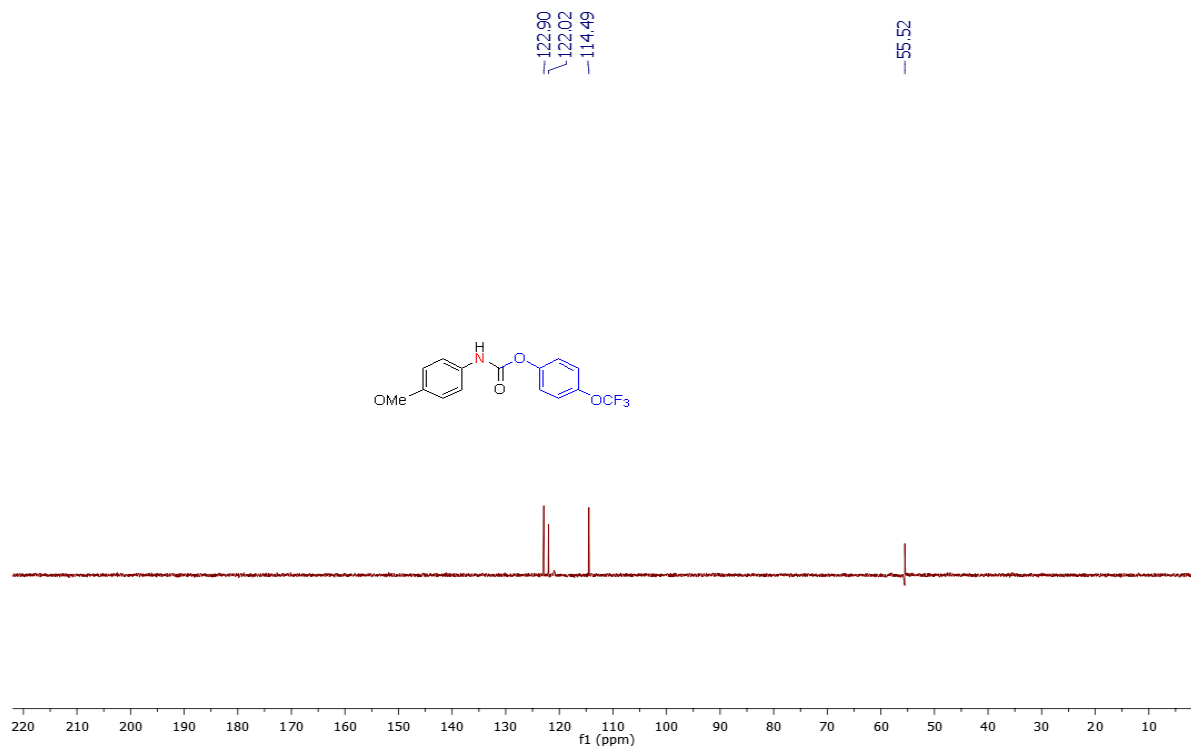

## HRMS (ESI-TOF) of compound (4b)

### Elemental Composition Report

Page 1

### Single Mass Analysis

Tolerance = 3.0 PPM / DBE: min = -1.5, max = 50.0

Element prediction: Off

Number of isotope peaks used for i-FIT = 3

Monoisotopic Mass, Even Electron Ions

41 formula(e) evaluated with 1 results within limits (up to 3 closest results for each mass)

Elements Used:

C: 0-15 H: 0-200 N: 0-1 O: 0-4 F: 0-3

F-153

291021\_08 9 (0.208) Cm (9:11)

QMI DIVISION, CSIR-IIIM JAMMU  
Xevo G2-XS QTOF YFC2015

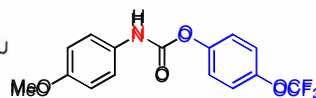

29-Oct-2021  
12:18:02  
1: TOF MS ES+  
1.03e+006

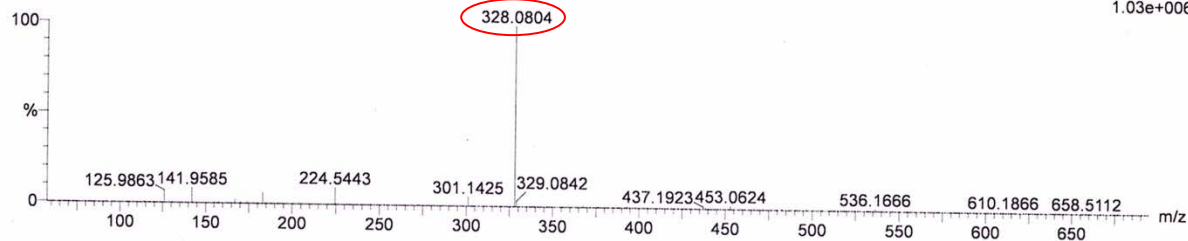

Minimum: -1.5  
Maximum: 2.0 3.0 50.0

| Mass     | Calc. Mass | mDa | PPM | DBE | i-FIT | Norm | Conf (%) | Formula         |
|----------|------------|-----|-----|-----|-------|------|----------|-----------------|
| 328.0804 | 328.0797   | 0.7 | 2.1 | 8.5 | 42.9  | n/a  | n/a      | C15 H13 N O4 F3 |

### $^1\text{H-NMR}$ of 4-(trifluoromethoxy)phenyl (4-cyanophenyl)carbamate (4c)

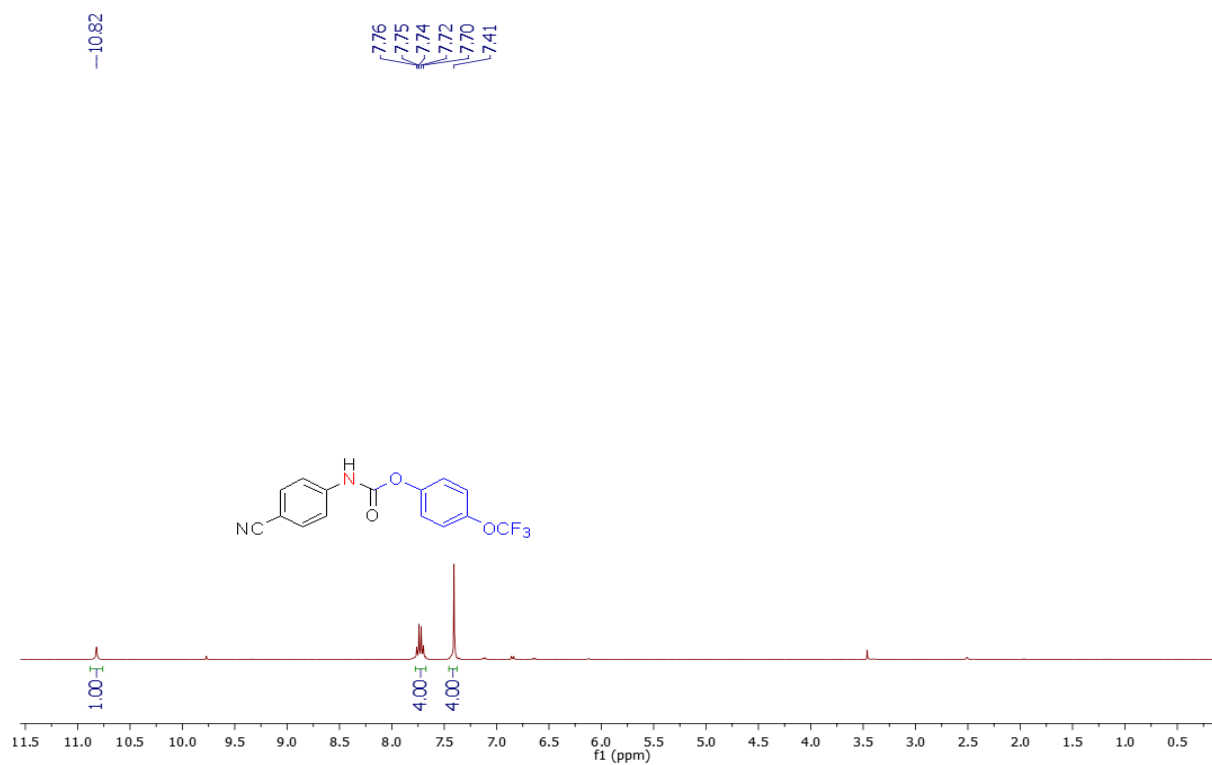

### $^{19}\text{F-NMR}$ of 4-(trifluoromethoxy)phenyl (4-cyanophenyl)carbamate (4c)

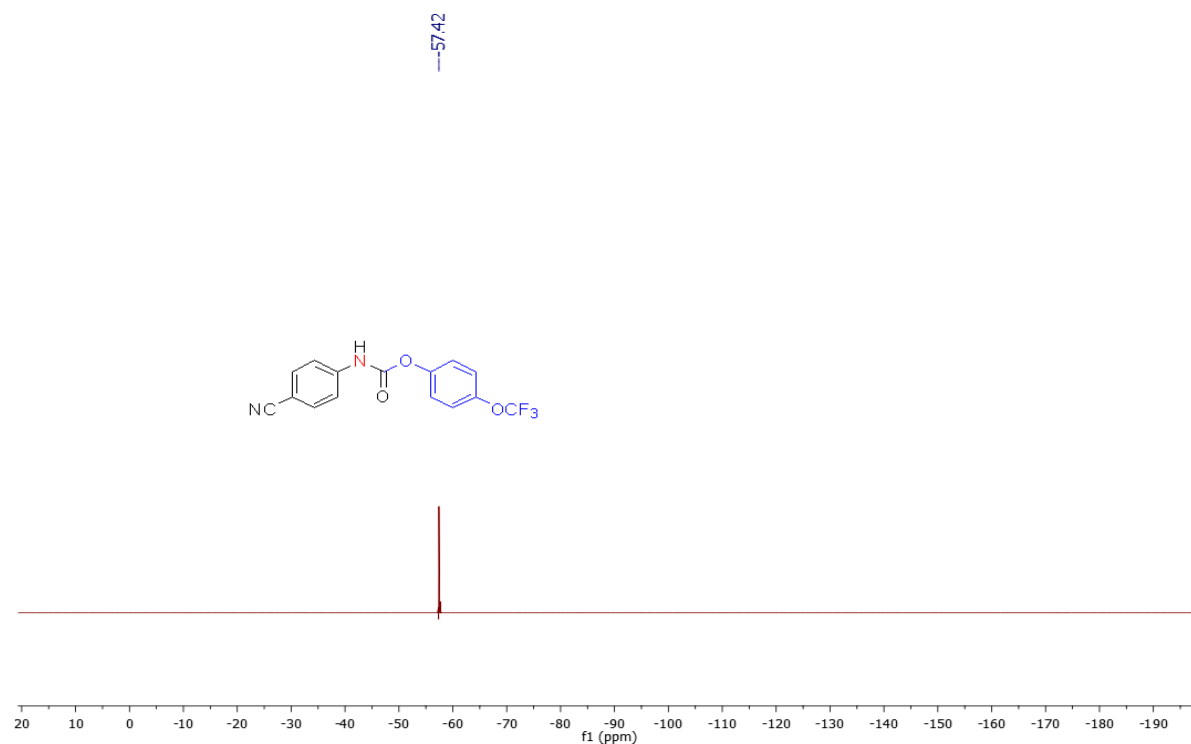

### <sup>13</sup>C-NMR of 4-(trifluoromethoxy)phenyl (4-cyanophenyl)carbamate (4c)

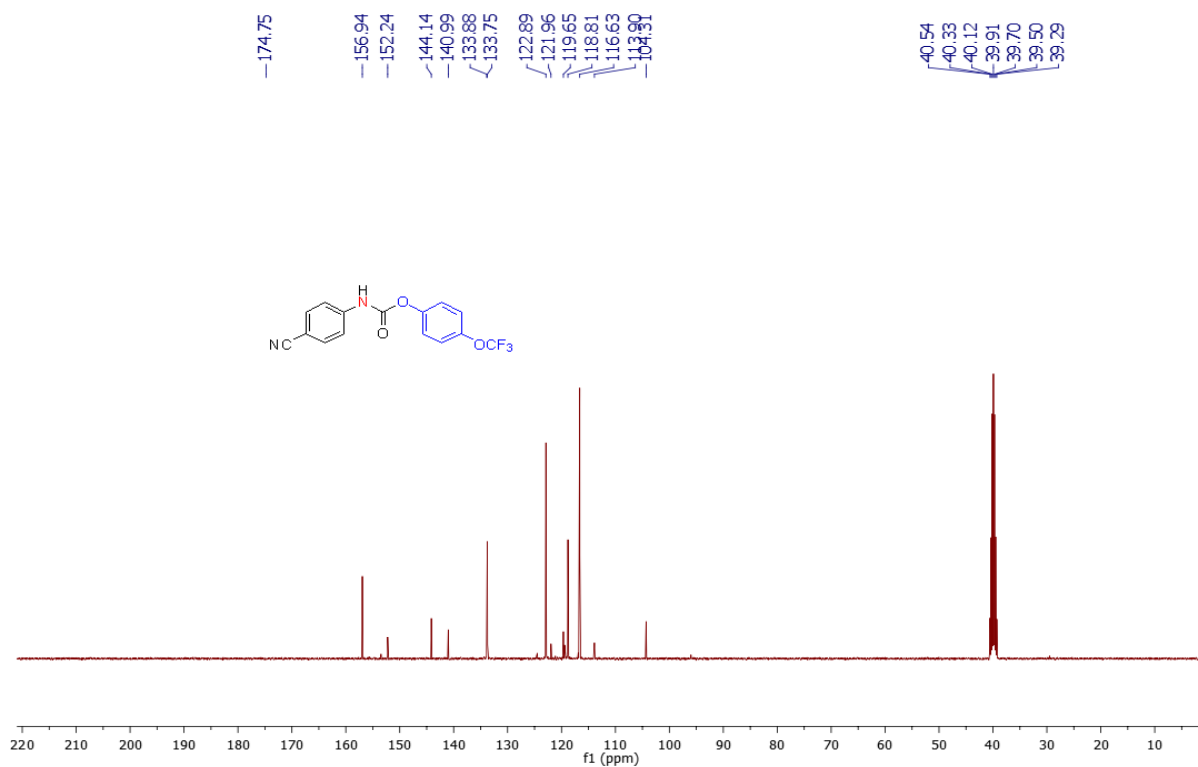

### DEPT of 4-(trifluoromethoxy)phenyl (4-cyanophenyl)carbamate (4c)

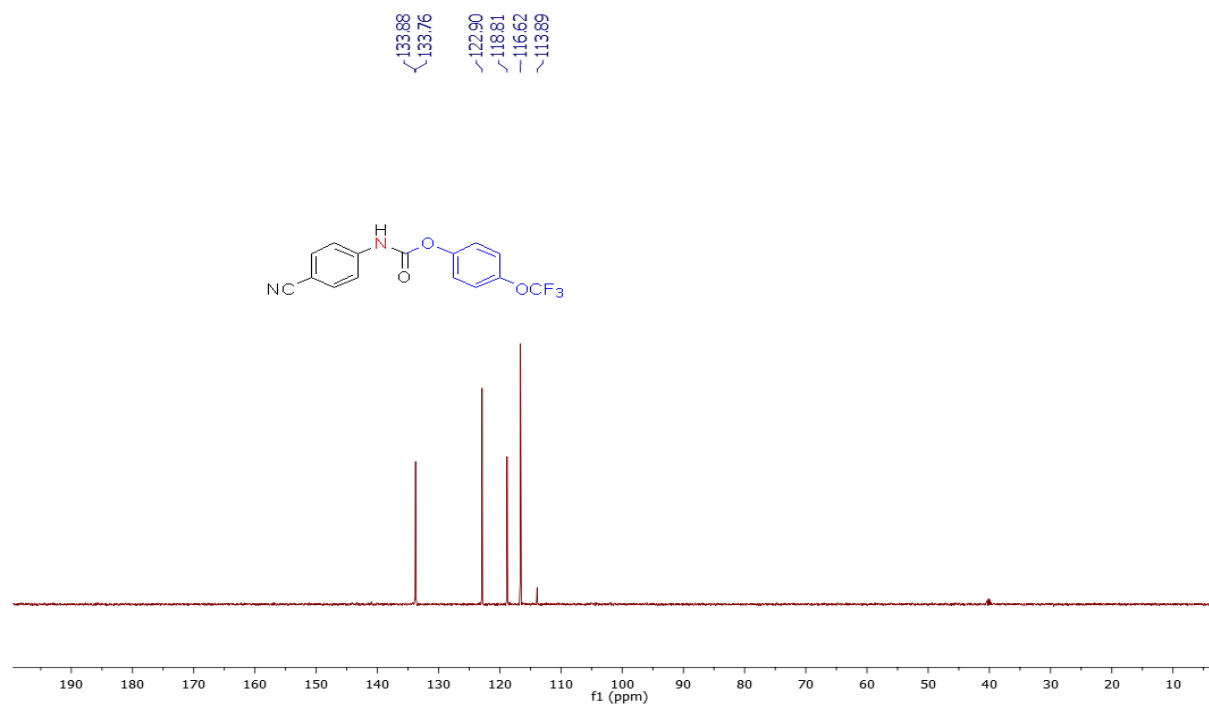

# Mass spectra of 4-(trifluoromethoxy)phenyl (4-cyanophenyl)carbamate (4c)

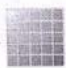

SHIMADZU  
LabSolutions

## Analysis Report

### <Sample Information>

Sample Name : 4C  
Sample ID :  
Data Filename : 28-JAN-22-57.lcd  
Method Filename : MASS SCANN 13APRIL2021.lcm  
Batch Filename : 28.01.2022.lcb  
Vial # : 1-85  
Injection Volume : 0.5 uL  
Date Acquired : 1/28/2022 6:00:46 PM  
Date Processed : 1/28/2022 6:01:47 PM

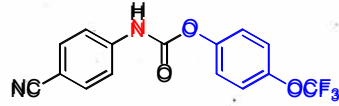

Sample Type : Unknown  
Acquired by : System Administrator  
Processed by : System Administrator

### <Chromatogram>

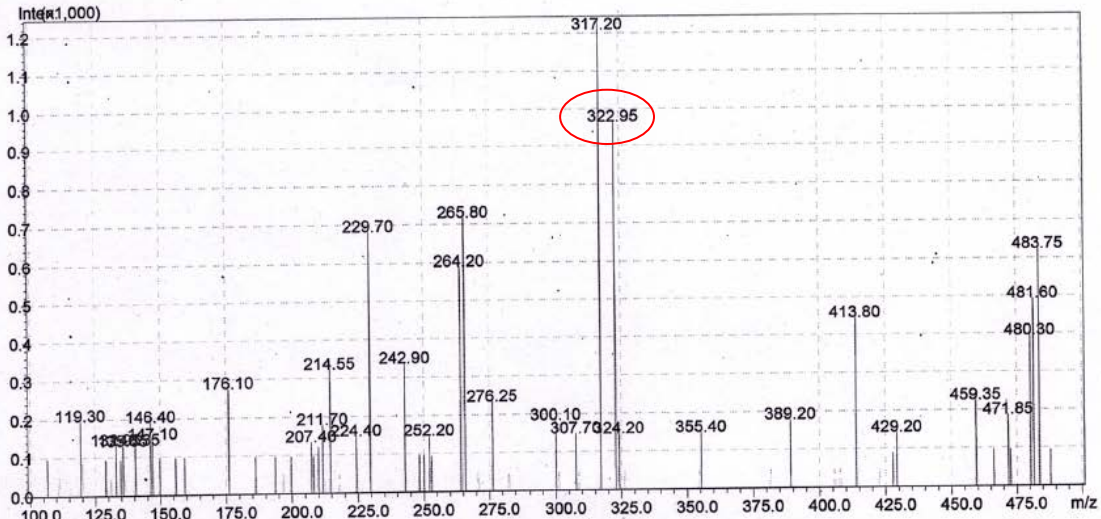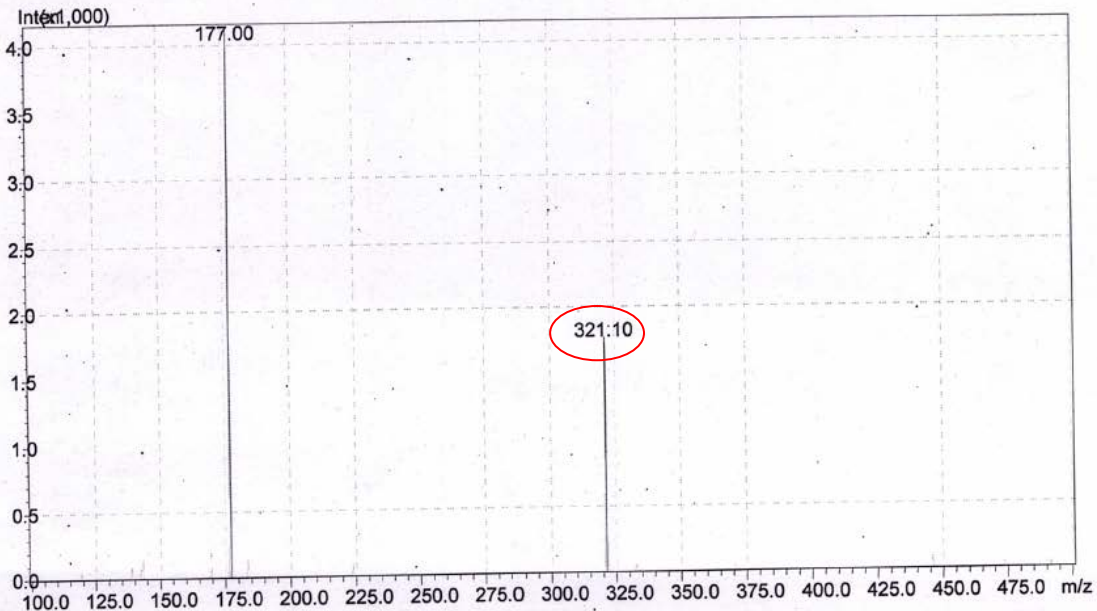



### <sup>1</sup>H-NMR of 4-isopropylphenyl (4-methoxyphenyl)carbamate (4d)

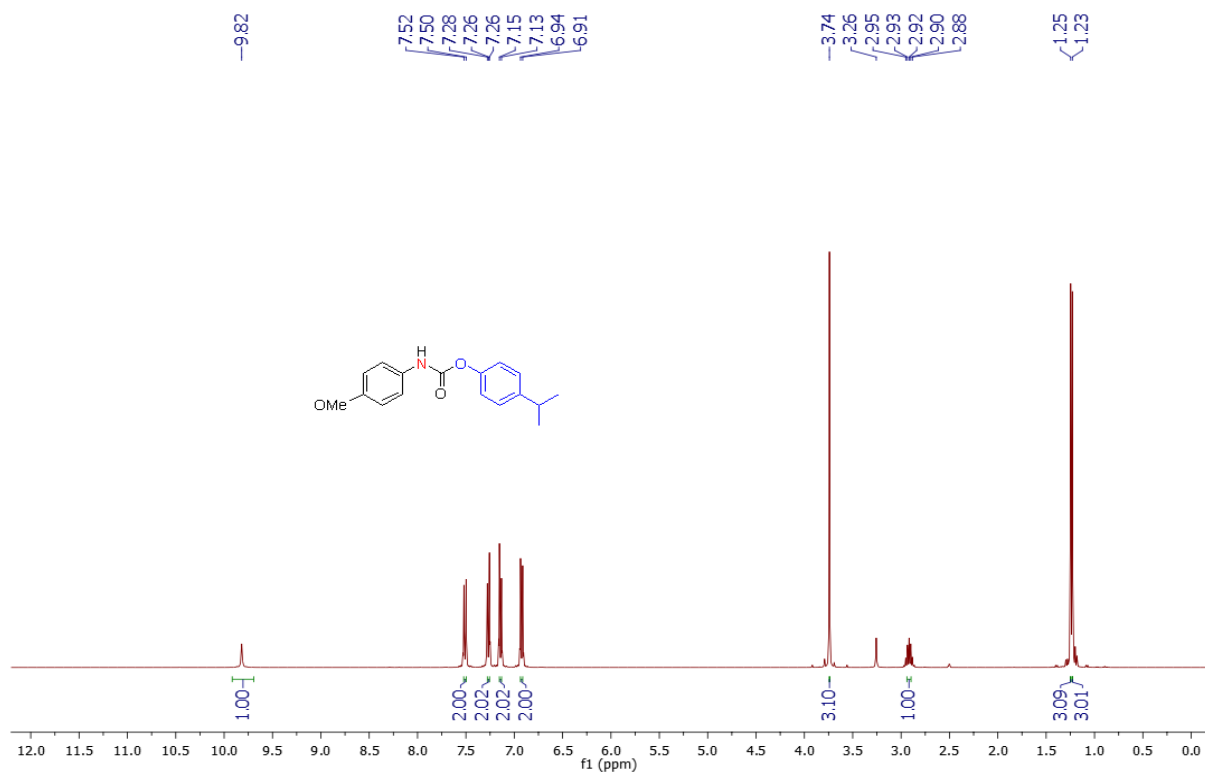

### <sup>13</sup>C-NMR of 4-isopropylphenyl (4-methoxyphenyl)carbamate (4d)

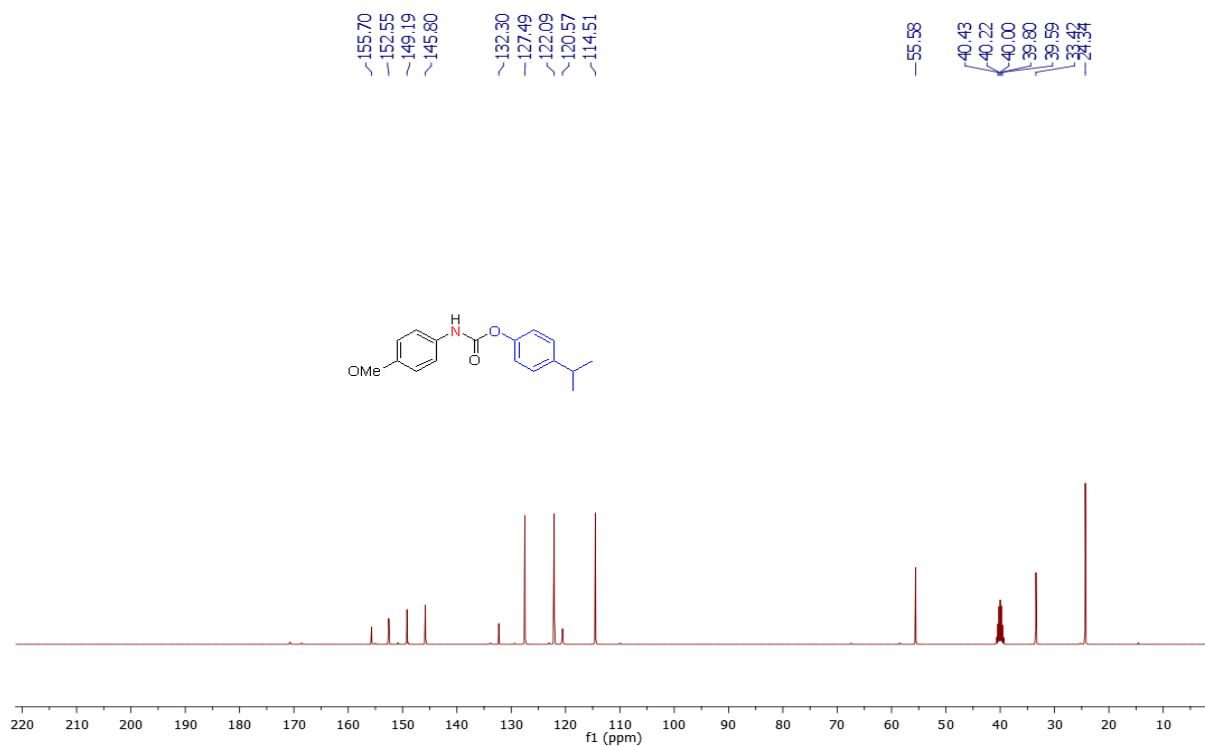

## DEPT of 4-isopropylphenyl (4-methoxyphenyl)carbamate (4d)

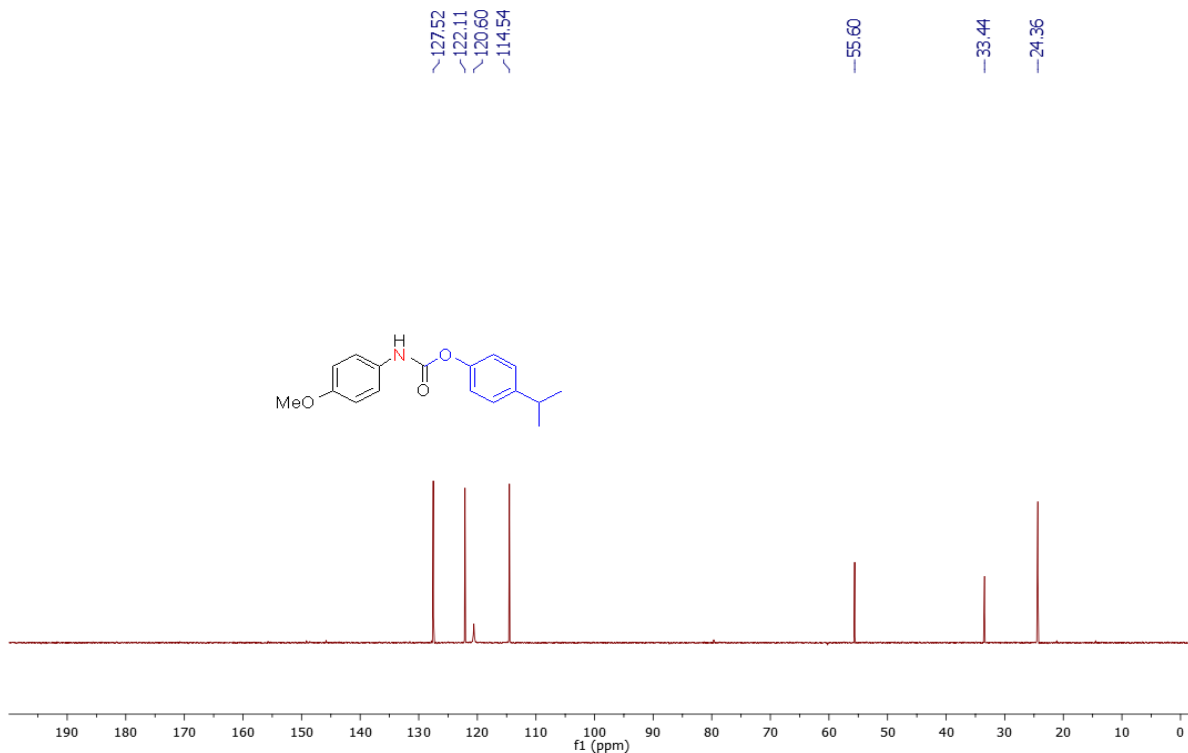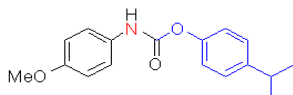

## HRMS of 4-isopropylphenyl (4-methoxyphenyl)carbamate (4d)

### Elemental Composition Report

Page 1

### Single Mass Analysis

Tolerance = 5.0 PPM / DBE: min = -1.5, max = 50.0

Element prediction: Off

Number of isotope peaks used for i-FIT = 3

Monoisotopic Mass, Even Electron Ions

53 formula(e) evaluated with 1 results within limits (up to 3 closest results for each mass)

Elements Used:

C: 0-17 H: 0-200 N: 0-1 O: 0-3 Cl: 0-2

FINT W

270122\_41 22 (0.448) Cm (22.23)

QMI DIVISION, CSIR-IIIM JAMMU  
Xevo G2-XS QTOF YFC2015

27-Jan-2022

13.30.38

1. TOF MS ES+

6.40e+005

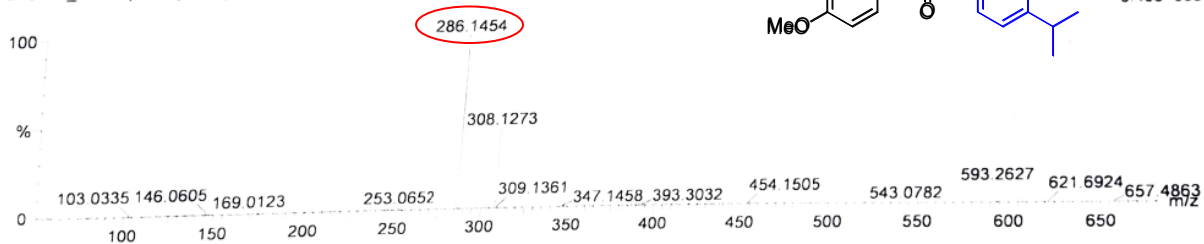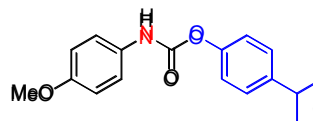

| Mass     | Calc. Mass | mDa | PPM | DBE | i-FIT | Norm | Conf (%) | Formula      |
|----------|------------|-----|-----|-----|-------|------|----------|--------------|
| 286.1454 | 286.1443   | 1.1 | 3.8 | 8.5 | 48.7  | n/a  | n/a      | C17 H20 N O3 |

# <sup>1</sup>H-NMR of butyl (4-methoxyphenyl)carbamate (4e)

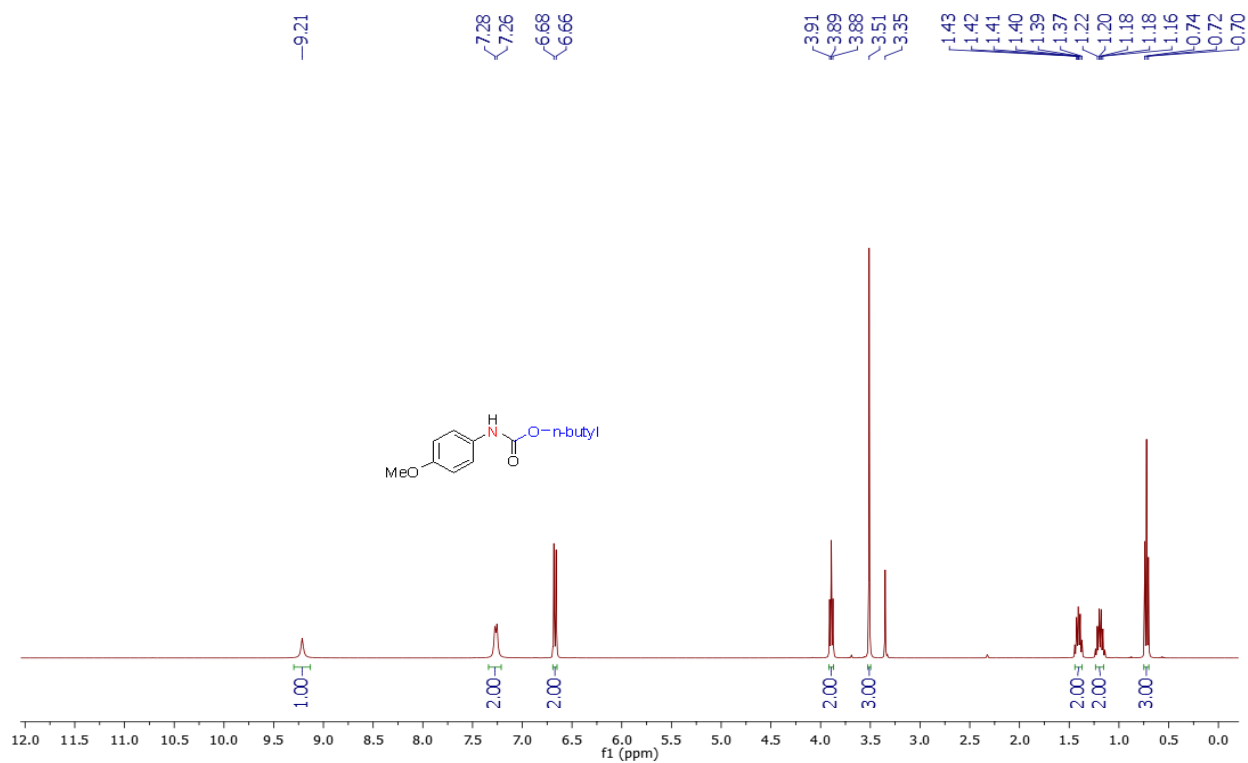

# <sup>13</sup>C-NMR of butyl (4-methoxyphenyl)carbamate (4e)

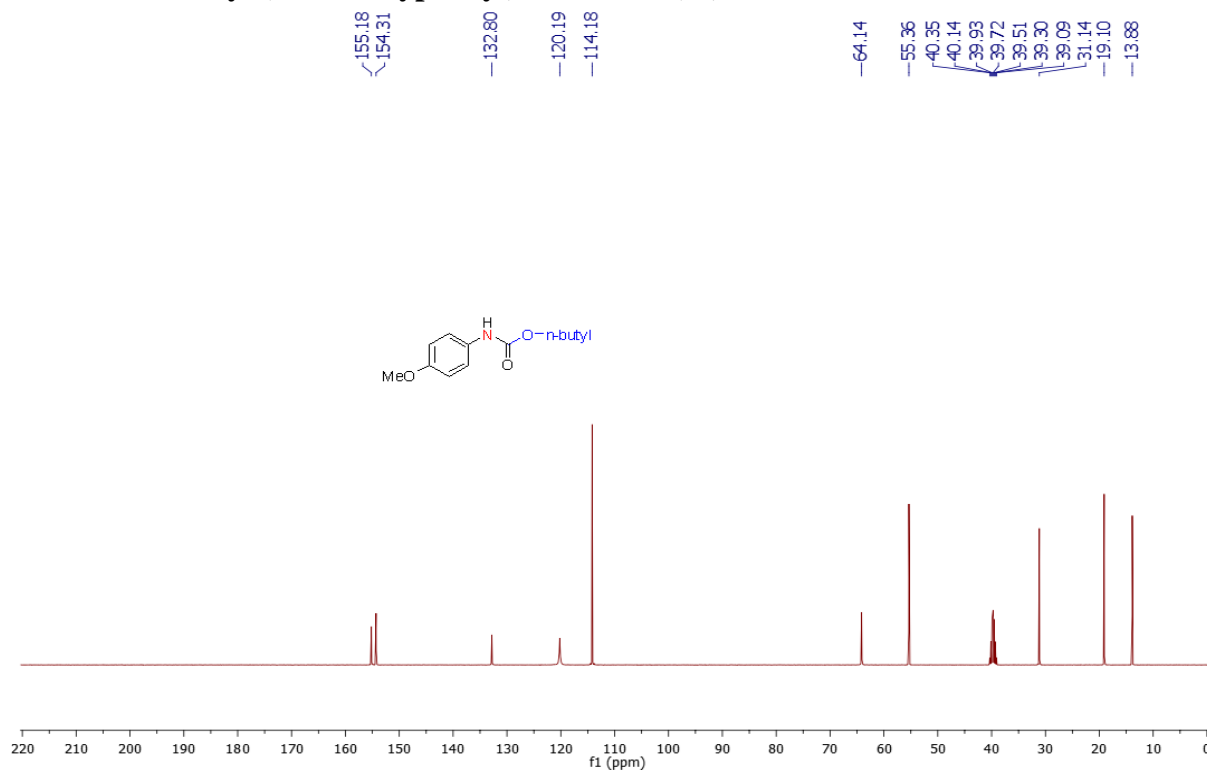

## DEPT of butyl (4-methoxyphenyl)carbamate (4e)

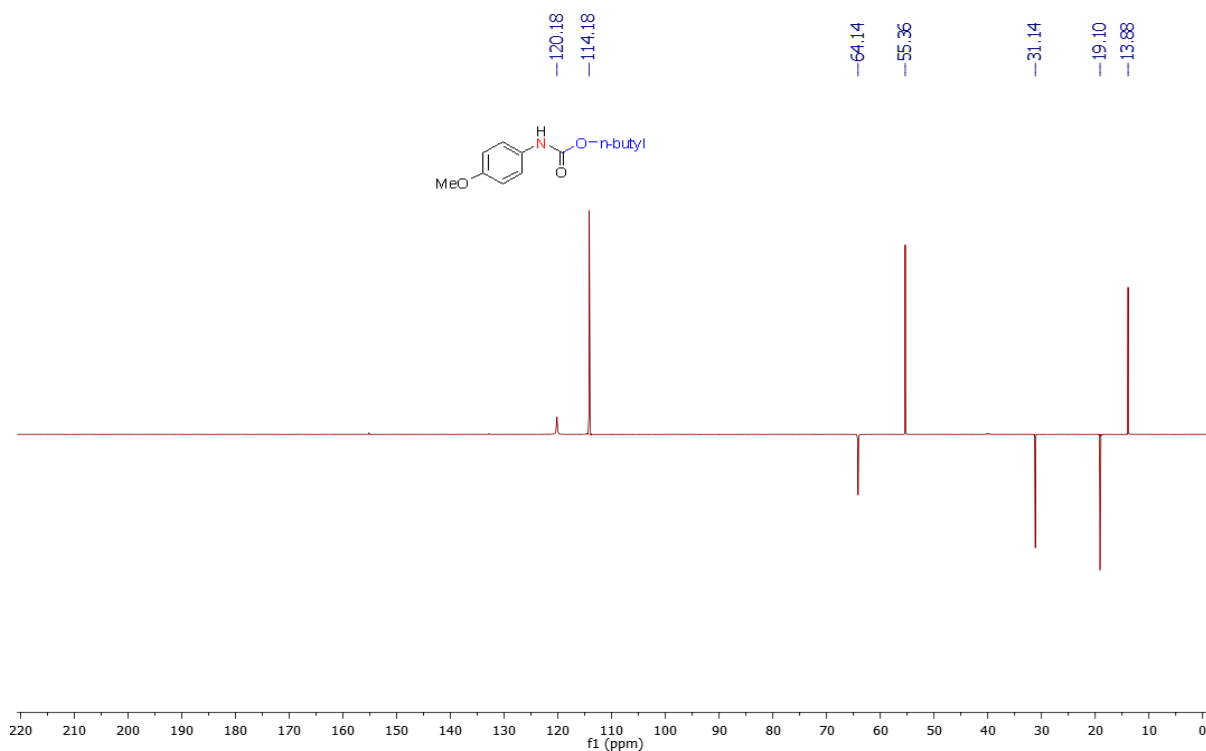

## HRMS of butyl (4-methoxyphenyl)carbamate (4e)

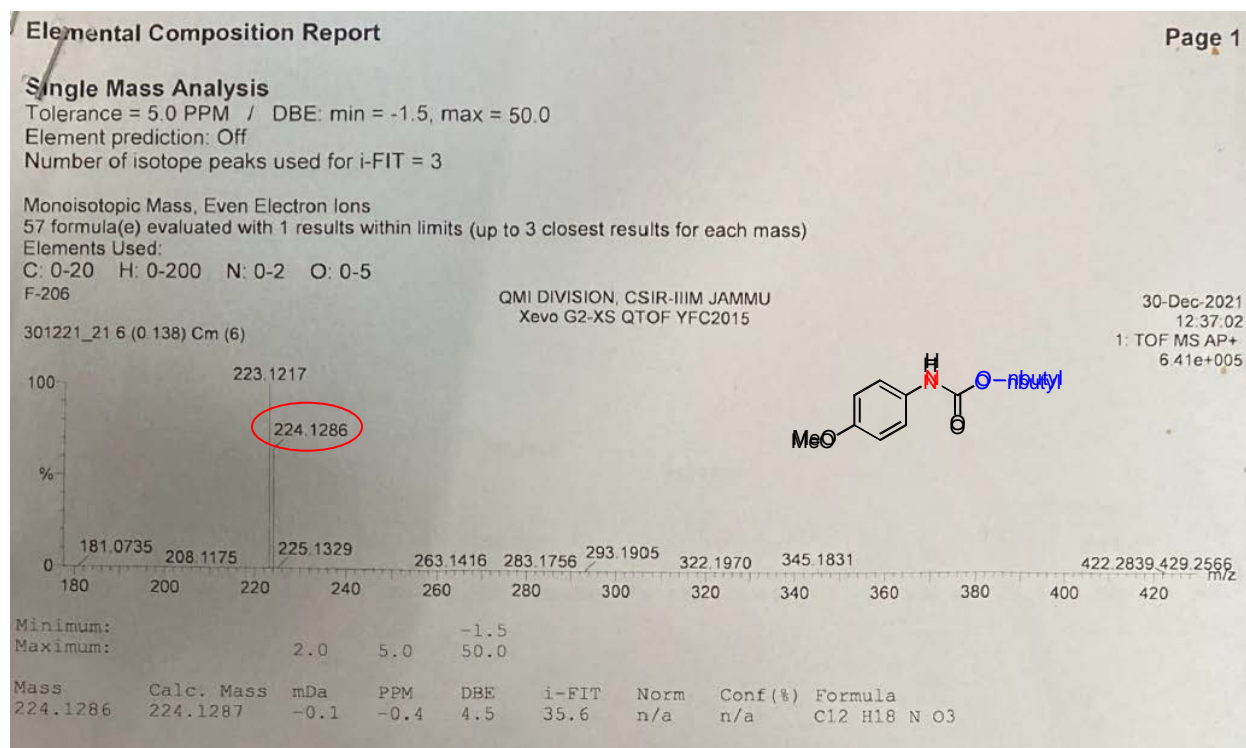

### <sup>1</sup>H-NMR of butyl (4-cyanophenyl)carbamate (4f)

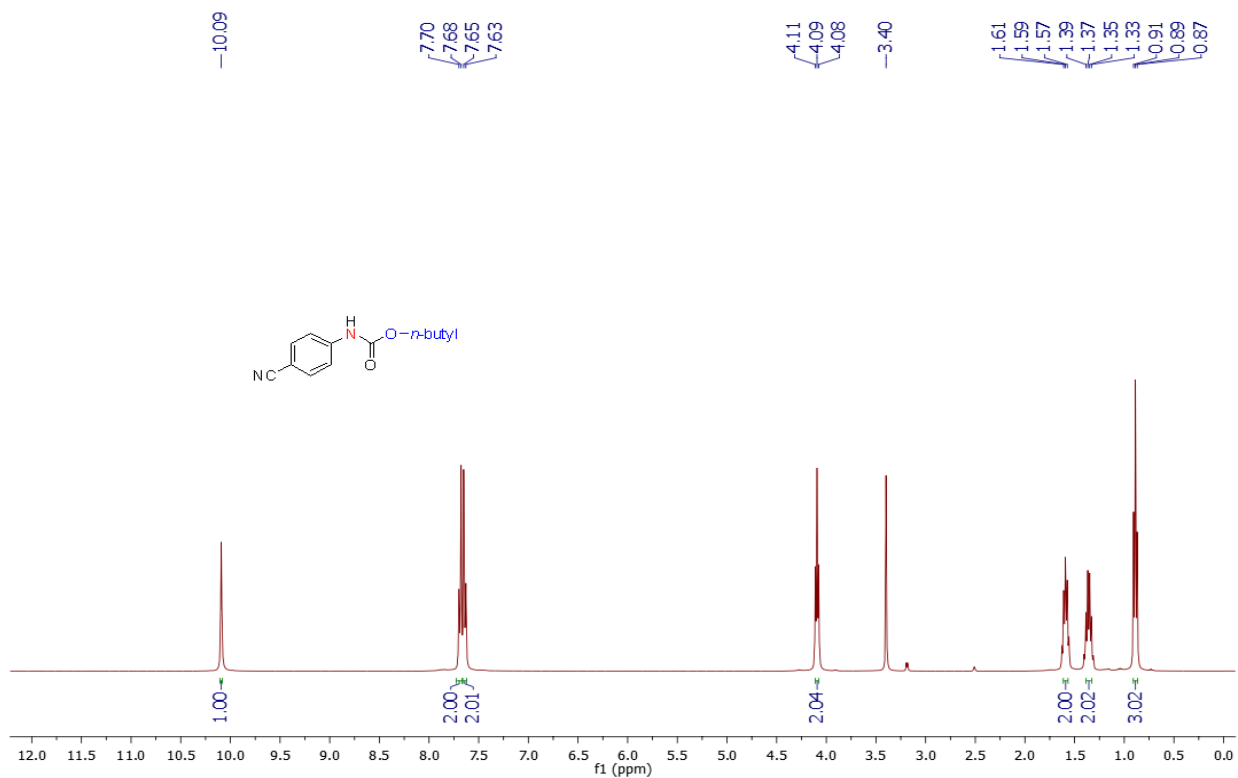

### <sup>13</sup>C-NMR of butyl (4-cyanophenyl)carbamate (4f)

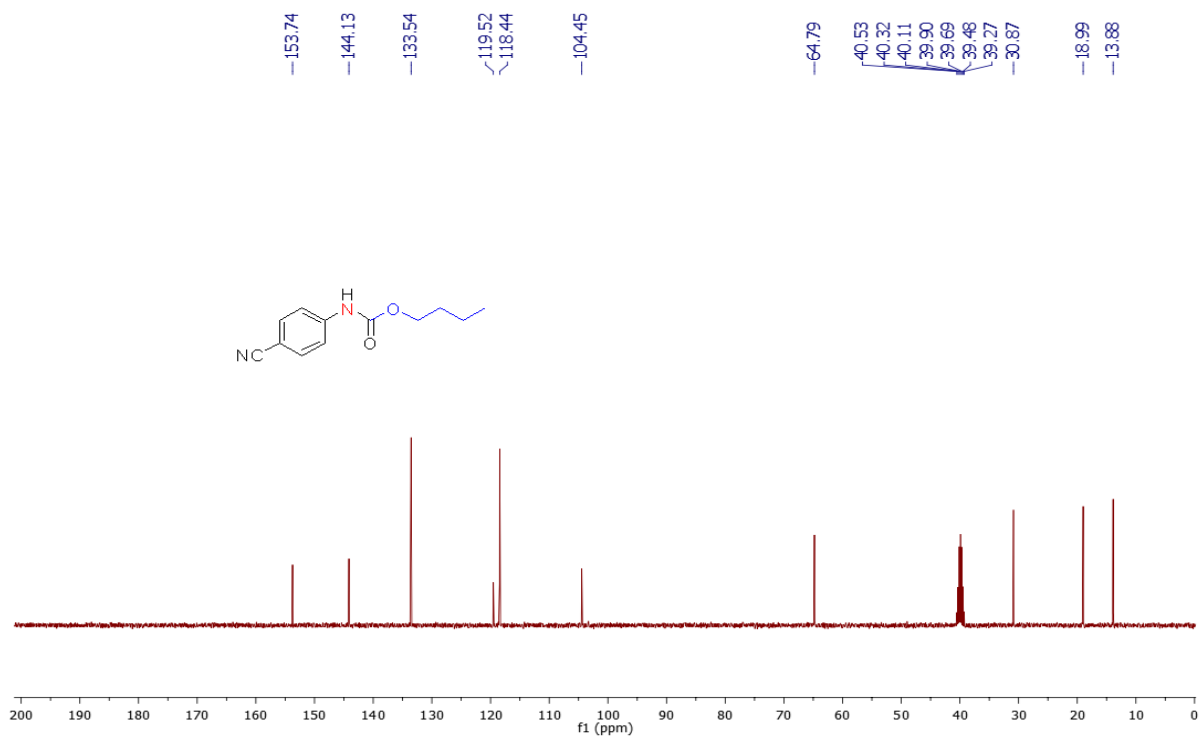

## DEPT of butyl (4-cyanophenyl)carbamate (4f)

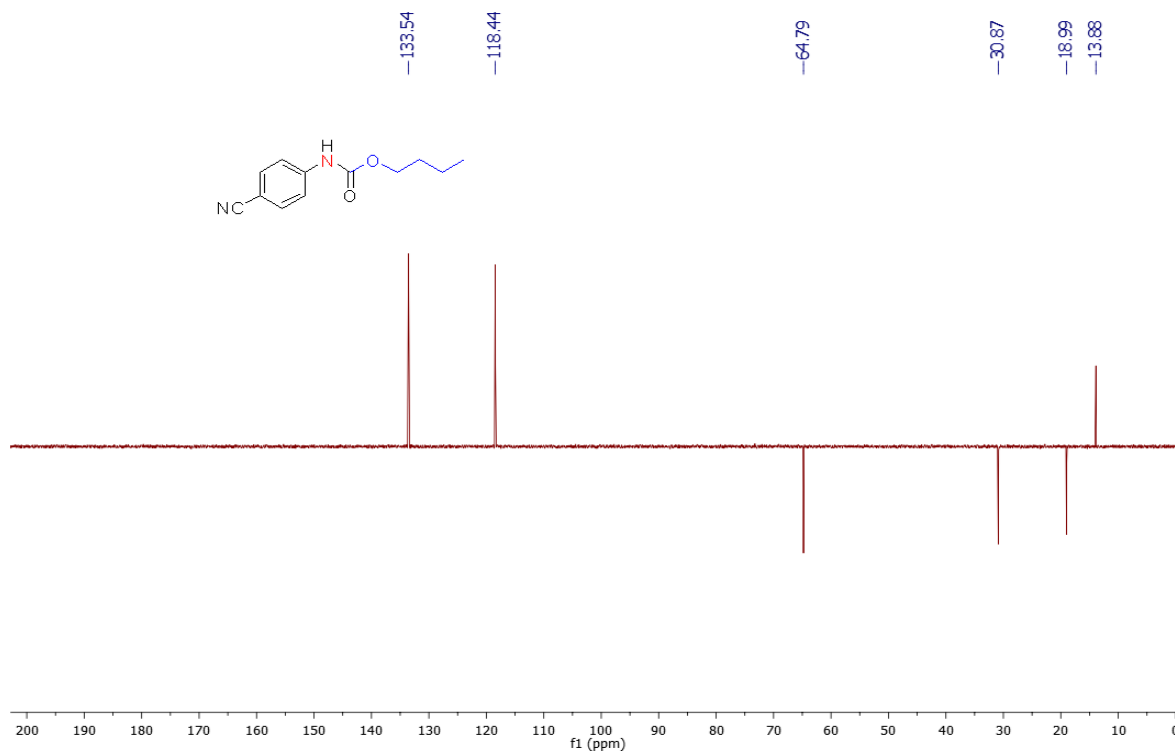

## HRMS (ESI-TOF) of compound (4f)

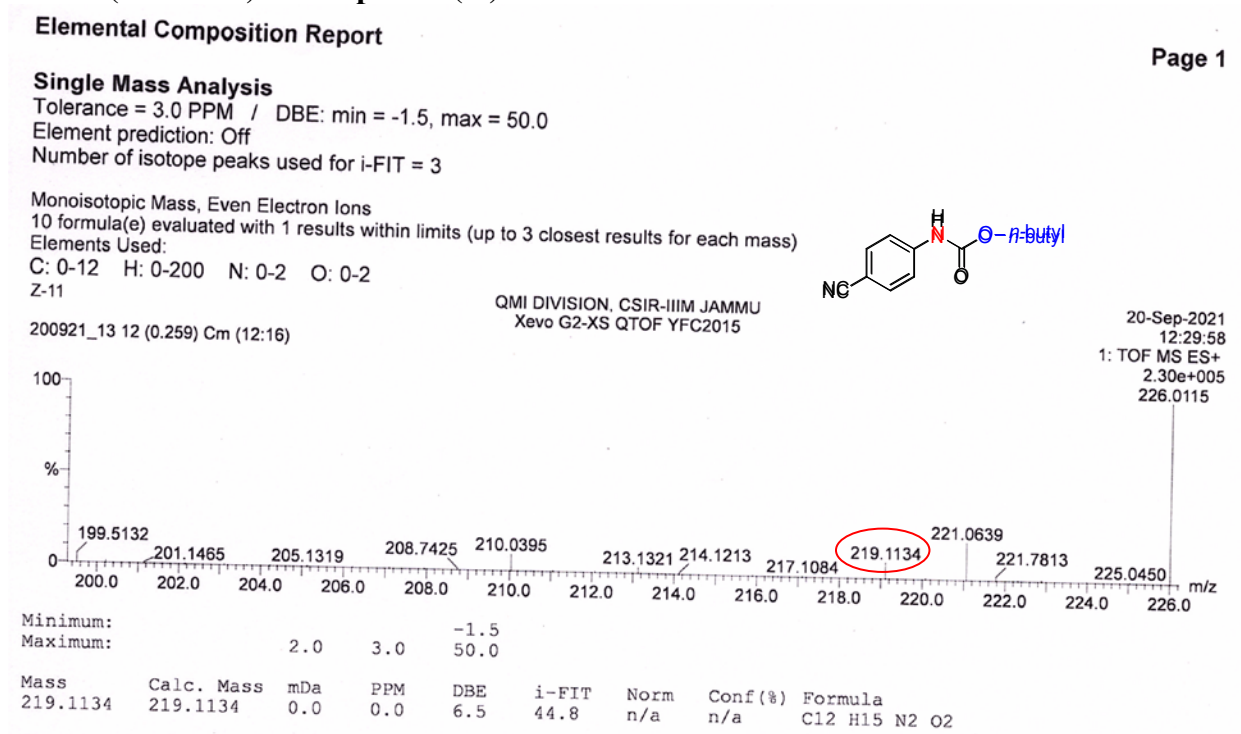

### <sup>1</sup>H-NMR of isopropyl (4-cyanophenyl)carbamate (4g)

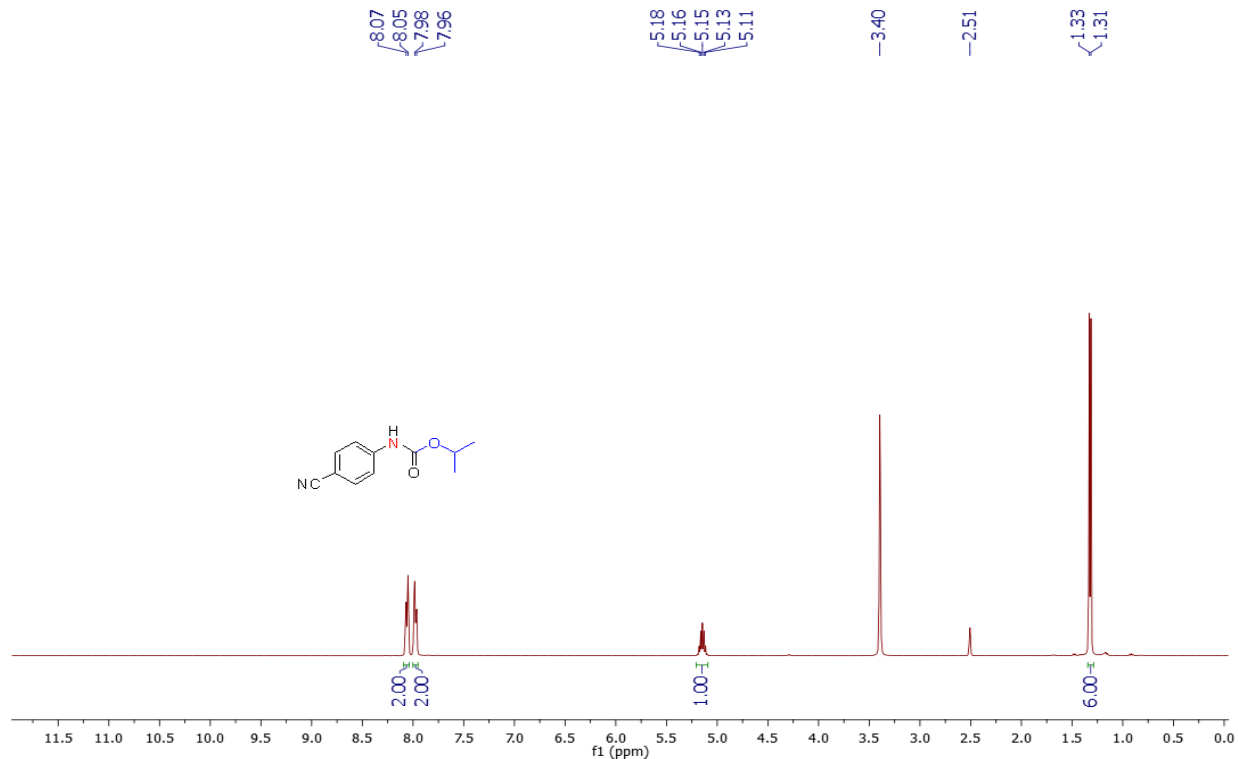

### <sup>13</sup>C-NMR of isopropyl (4-cyanophenyl)carbamate (4g)

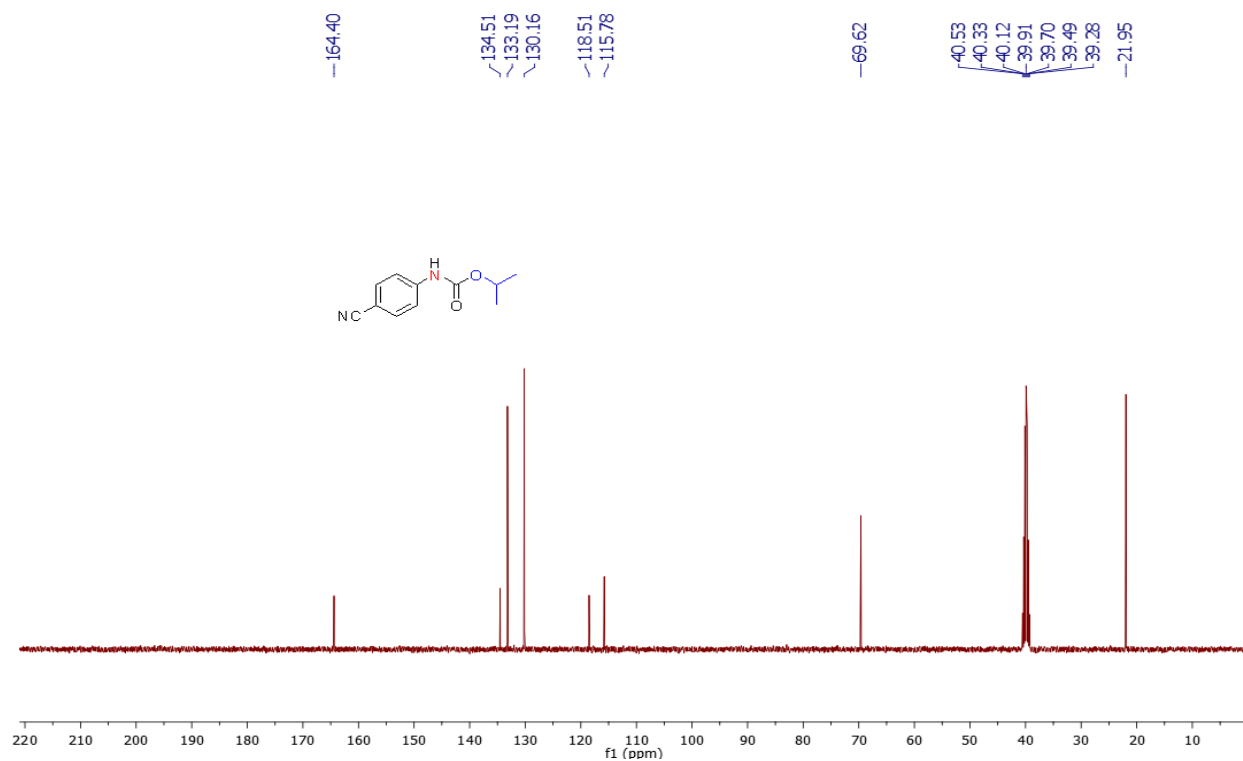

### DEPT of isopropyl (4-cyanophenyl)carbamate (4g)

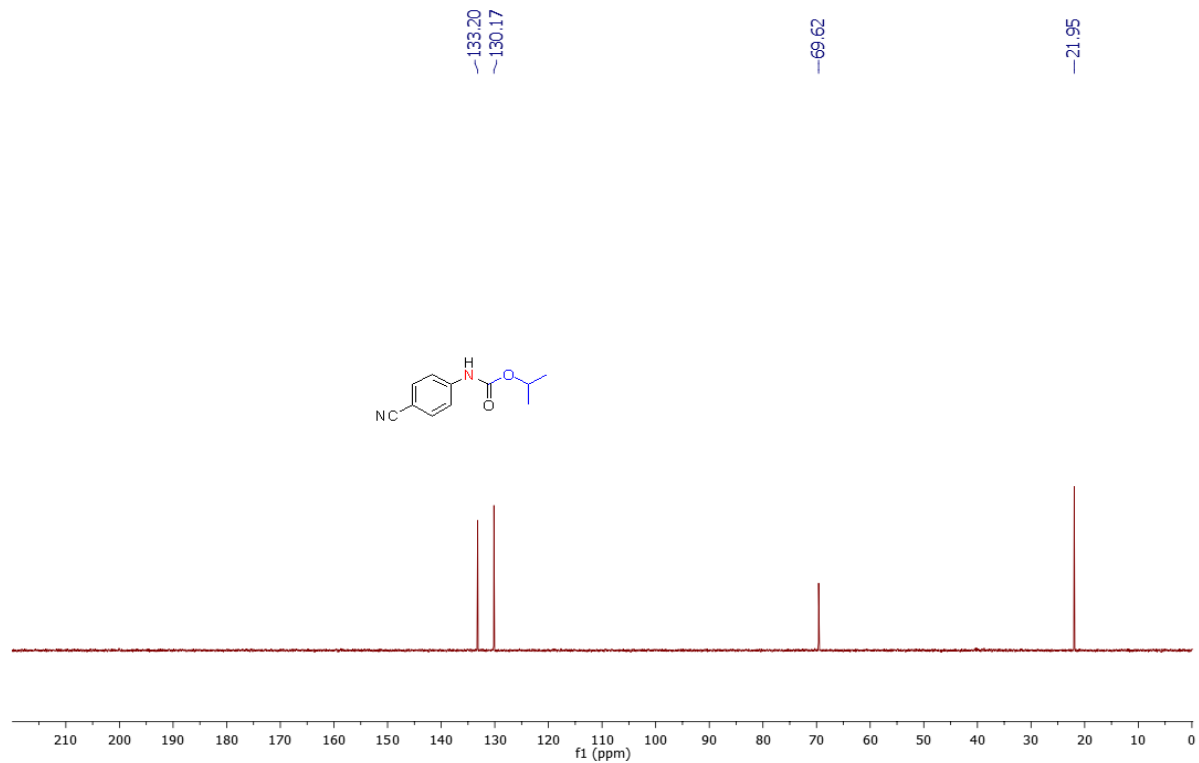

### <sup>1</sup>H-NMR of *S*-phenyl (4-methoxyphenyl)carbamothioate (4h)

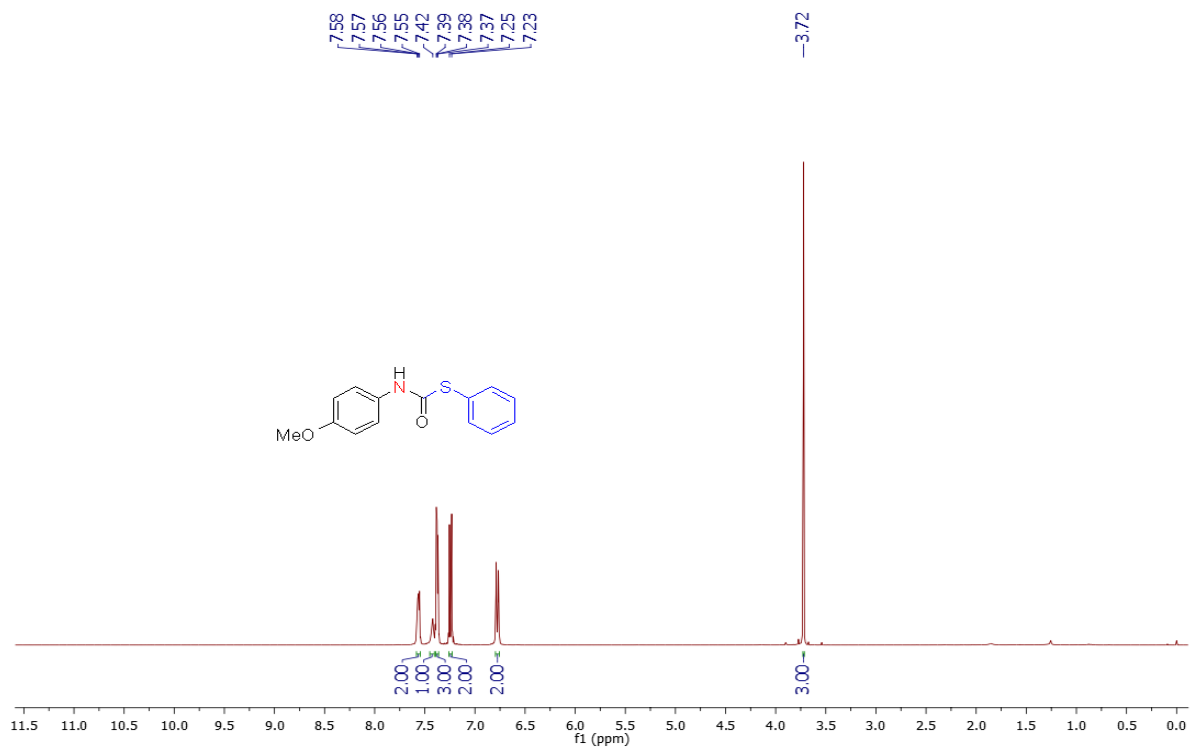



### <sup>13</sup>C-NMR of *S*-phenyl (4-methoxyphenyl)carbamothioate (4h)

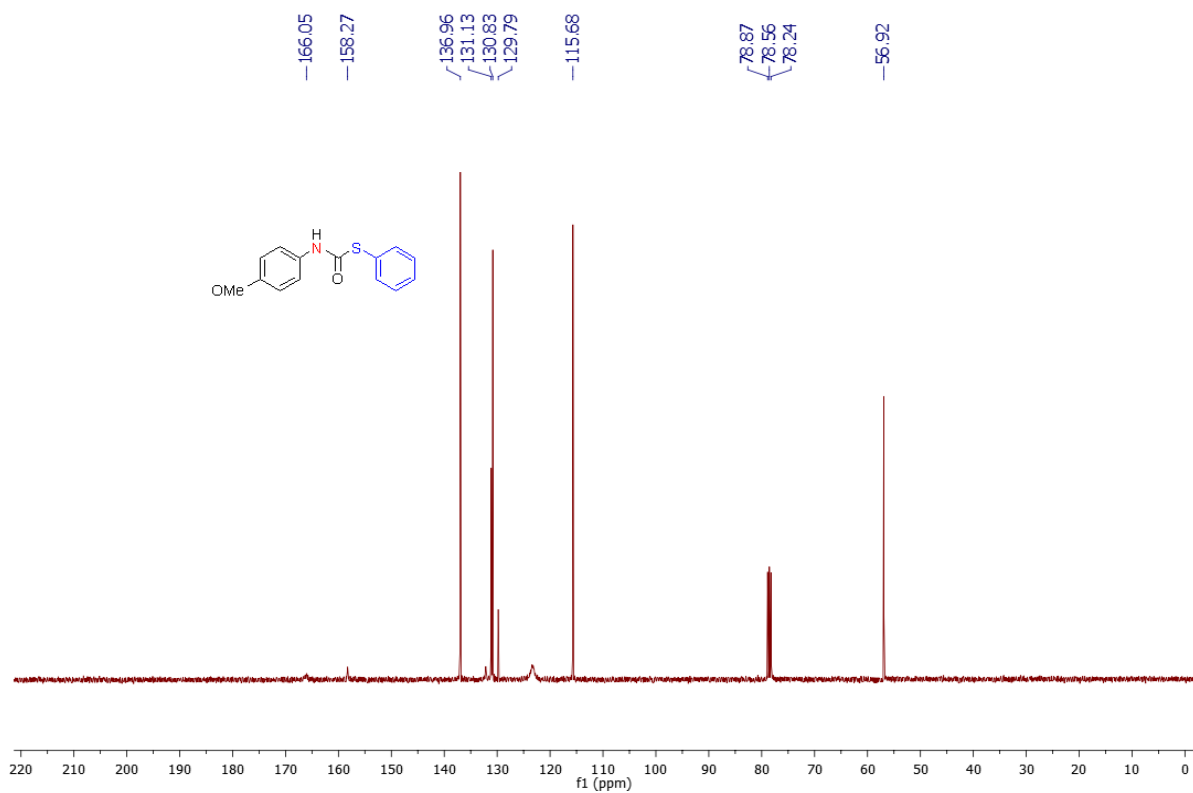

### DEPT of *S*-phenyl (4-methoxyphenyl)carbamothioate (4h)

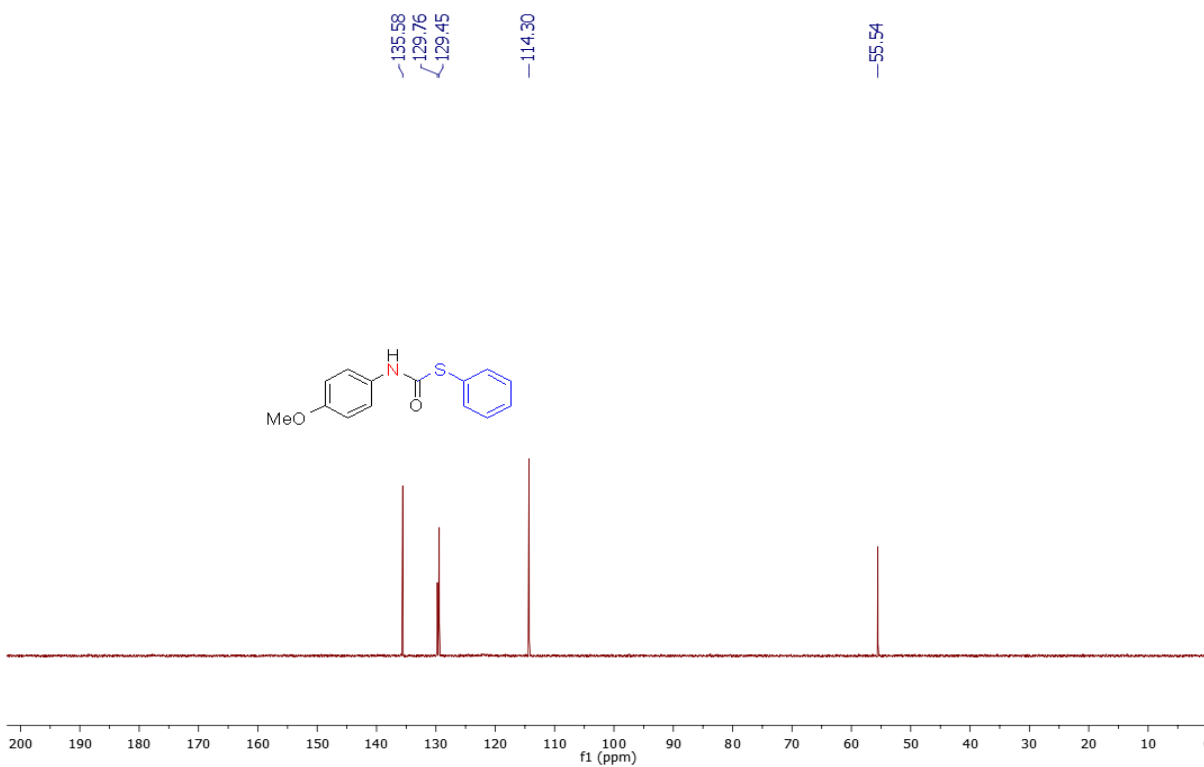

## HRMS of *S*-phenyl (4-methoxyphenyl)carbamothioate (4h)

### Elemental Composition Report

Page 1

#### Single Mass Analysis

Tolerance = 5.0 PPM / DBE: min = -1.5, max = 50.0

Element prediction: Off

Number of isotope peaks used for i-FIT = 3

Monoisotopic Mass, Even Electron Ions

28 formula(e) evaluated with 1 results within limits (up to 3 closest results for each mass)

Elements Used:

C: 0-14 H: 0-200 N: 0-1 O: 0-2 S: 0-2

F-183

291221\_30 17 (0.363) Cm (17)

QMI DIVISION, CSIR-IIIM JAMMU  
Xevo G2-XS QTOF YFC2015

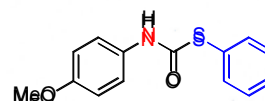

29-Dec-2021  
13:14:13  
1: TOF MS ES+  
8.25e+004

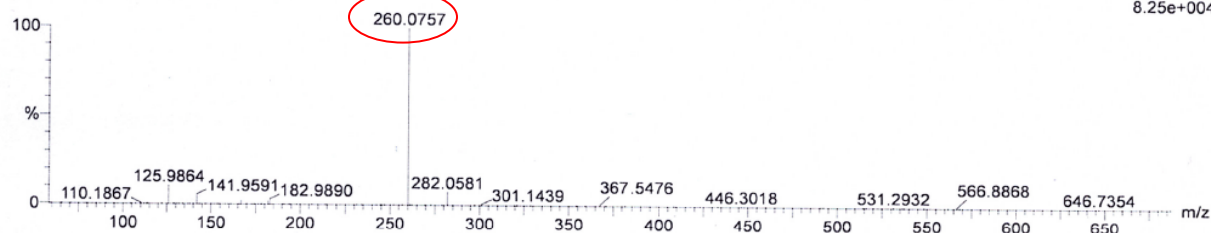

Minimum: -1.5  
Maximum: 2.0 5.0 50.0

| Mass     | Calc. Mass | mDa | PPM | DBE | i-FIT | Norm | Conf (%) | Formula        |
|----------|------------|-----|-----|-----|-------|------|----------|----------------|
| 260.0757 | 260.0745   | 1.2 | 4.6 | 8.5 | 41.8  | n/a  | n/a      | C14 H14 N O2 S |

## <sup>1</sup>H-NMR of *S*-phenyl (4-cyanophenyl)carbamothioate (4i)

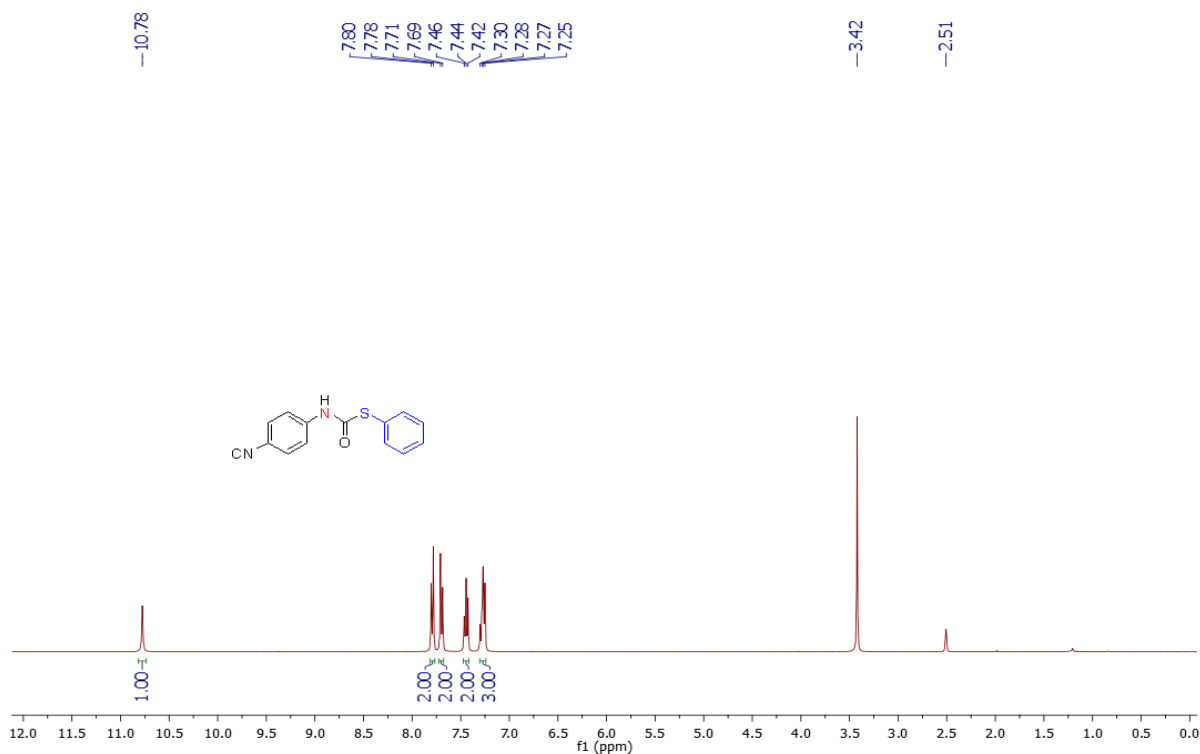

### <sup>13</sup>C-NMR of *S*-phenyl (4-cyanophenyl)carbamothioate (4i)

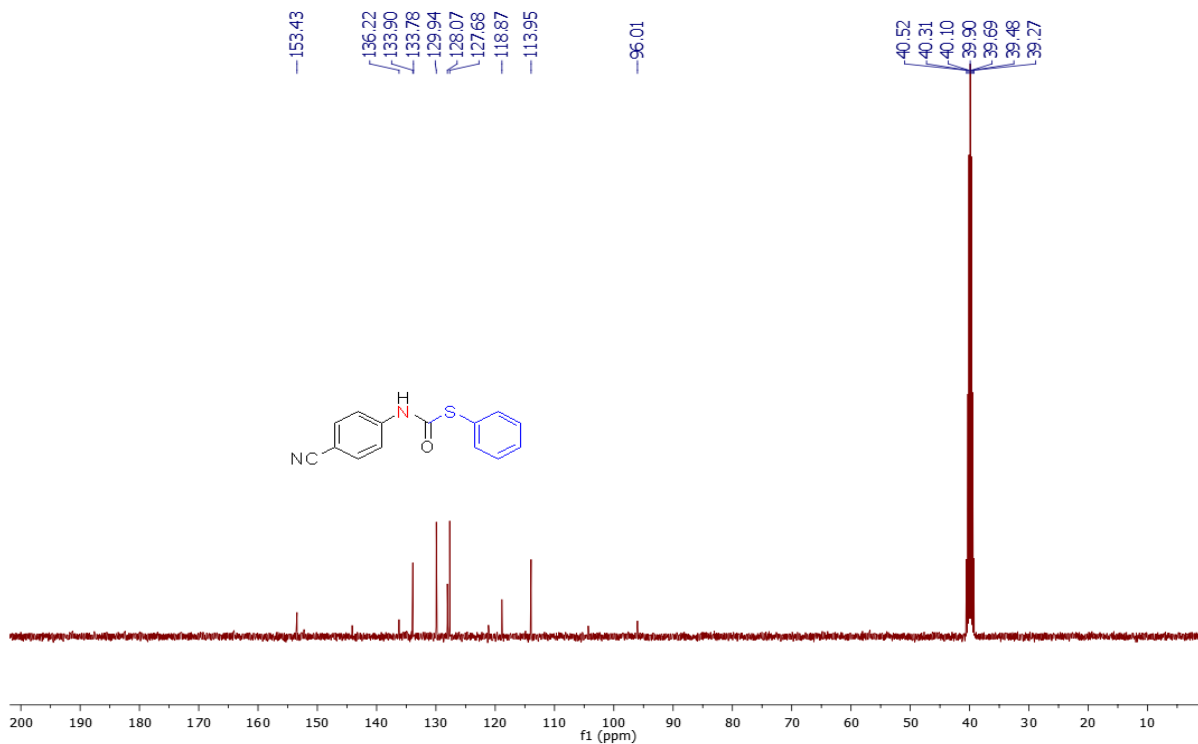

### DEPT of *S*-phenyl (4-cyanophenyl)carbamothioate (4i)

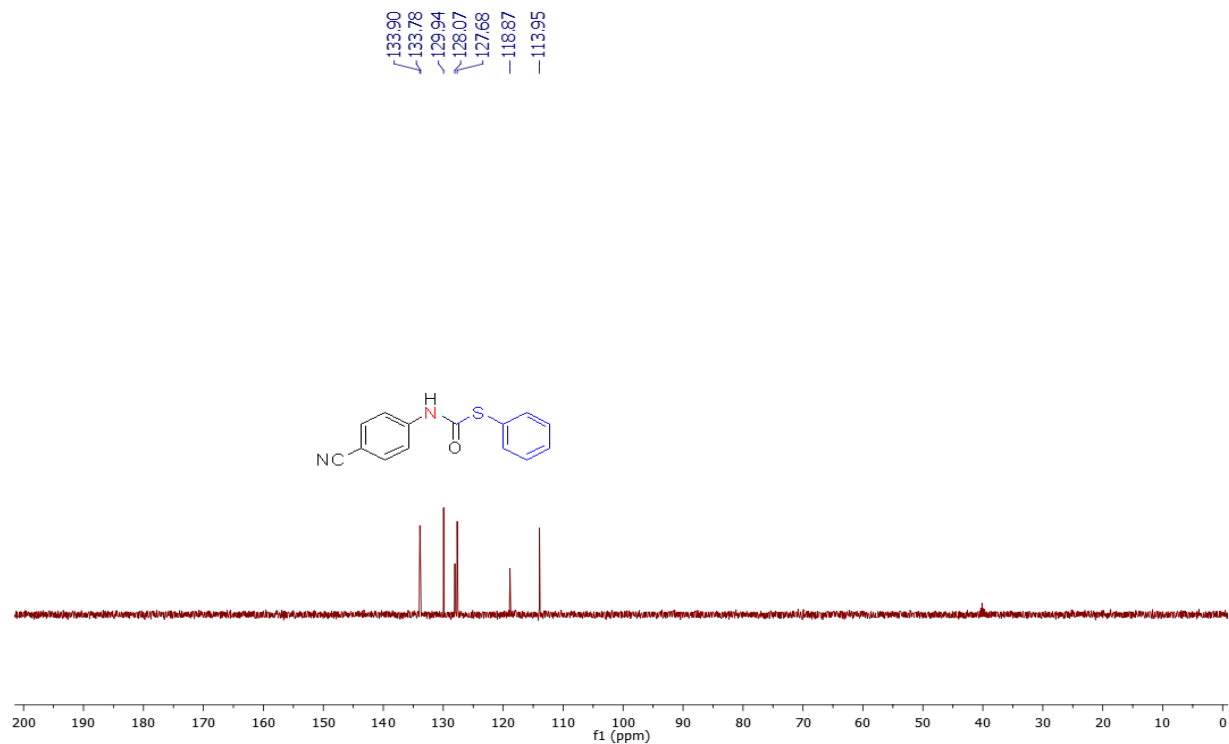

## HRMS of S-phenyl (4-cyanophenyl)carbamothioate (4i)

### Elemental Composition Report

Page 1

### Single Mass Analysis

Tolerance = 5.0 PPM / DBE: min = -1.5, max = 50.0

Element prediction: Off

Number of isotope peaks used for i-FIT = 3

Monoisotopic Mass, Even Electron Ions

16 formula(e) evaluated with 1 results within limits (up to 3 closest results for each mass)

Elements Used:

C: 0-14 H: 0-200 N: 0-2 O: 0-1 S: 0-1

4i

QMI DIVISION, CSIR-IIIM JAMMU  
Xevo G2-KS QTOF YFC2015

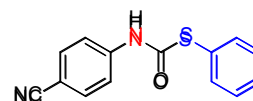

27-Jan-2022  
13:38:21  
1: TOF MS ES+  
9.93e+005

270122\_44 6 (0.138) Cm (4:8)

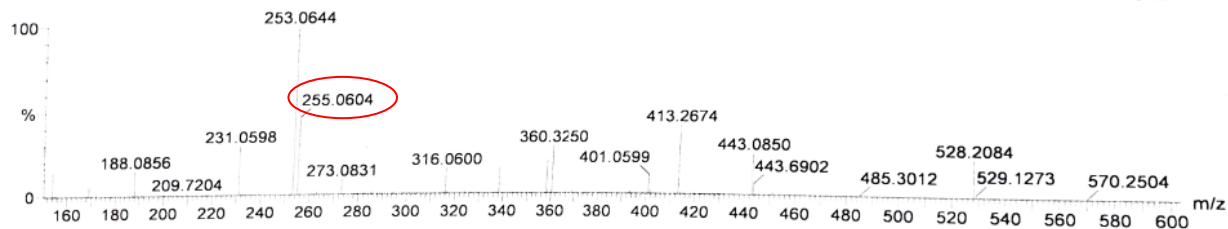

Minimum: -1.5  
Maximum: 2.0 5.0 50.0

| Mass     | Calc. Mass | mDa | PPM | DBE  | i-FIT | Norm | Conf(%) | Formula        |
|----------|------------|-----|-----|------|-------|------|---------|----------------|
| 255.0604 | 255.0592   | 1.2 | 4.7 | 10.5 | 53.7  | n/a  | n/a     | C14 H11 N2 O S |

## <sup>1</sup>H-NMR of S-dodecyl (4-methoxyphenyl)carbamothioate (4j)

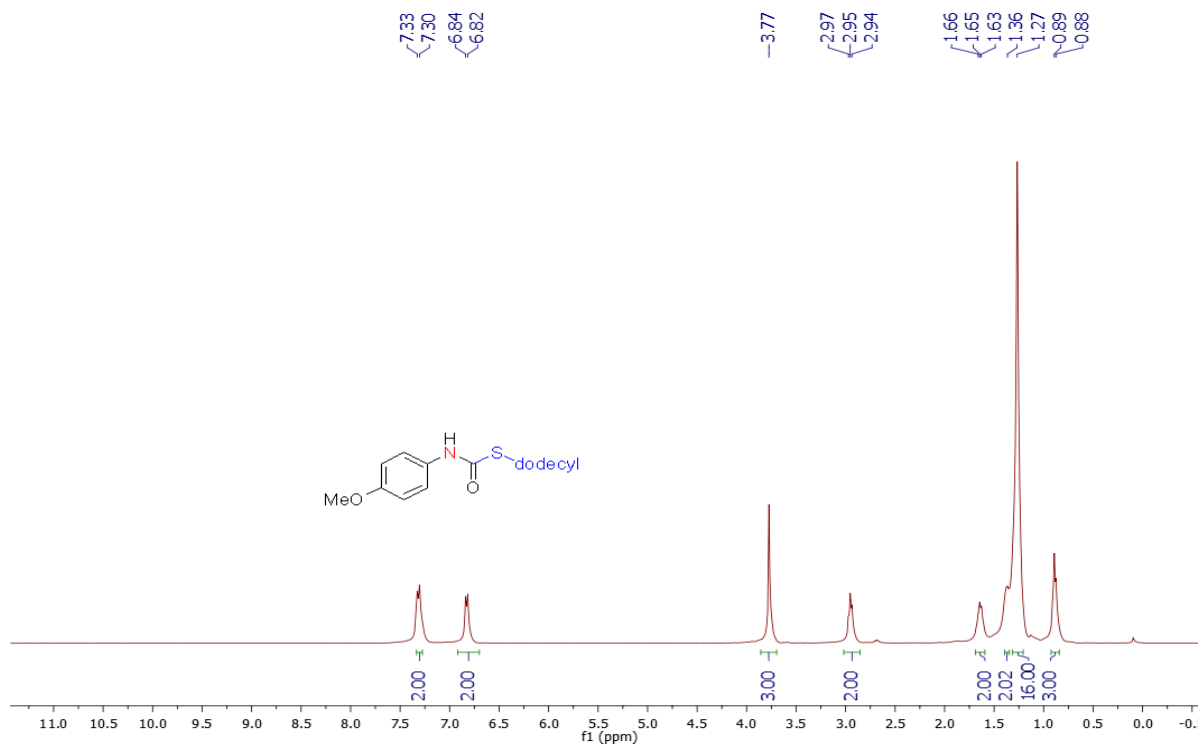

S132

### <sup>13</sup>C-NMR of S-dodecyl (4-methoxyphenyl)carbamothioate (4j)

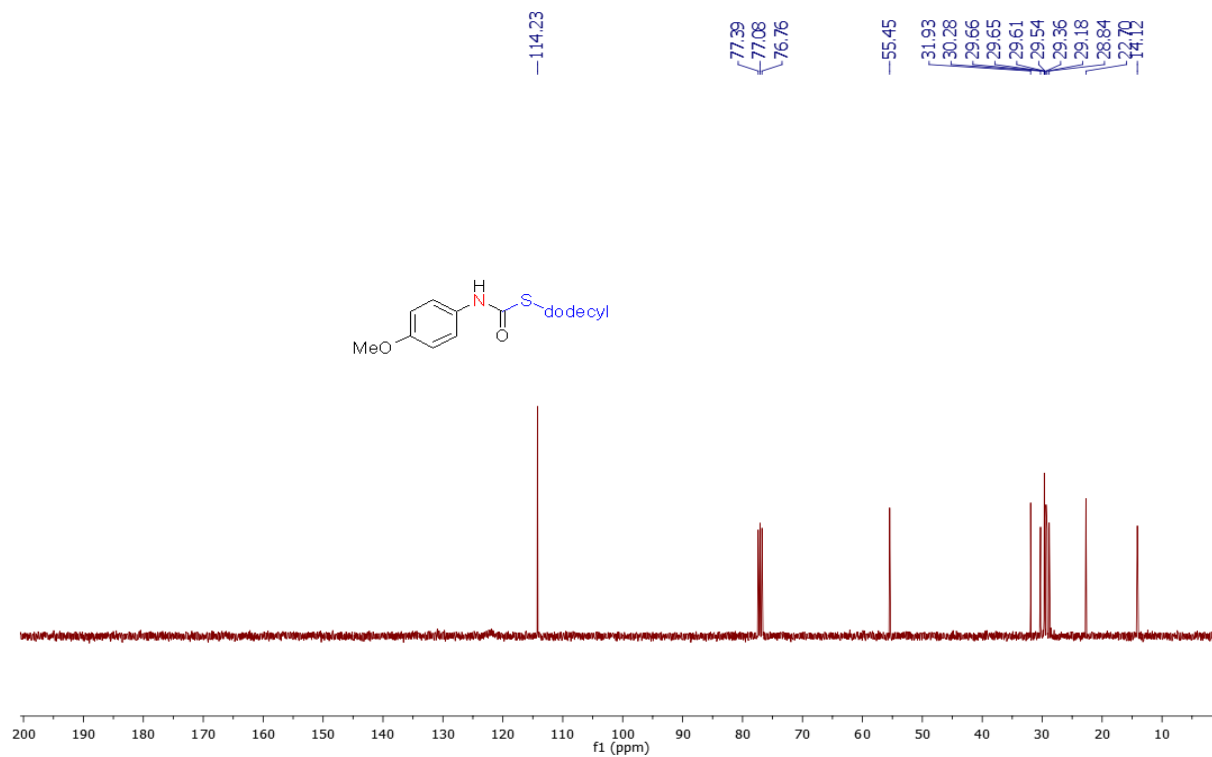

### DEPT of S-dodecyl (4-methoxyphenyl)carbamothioate (4j)

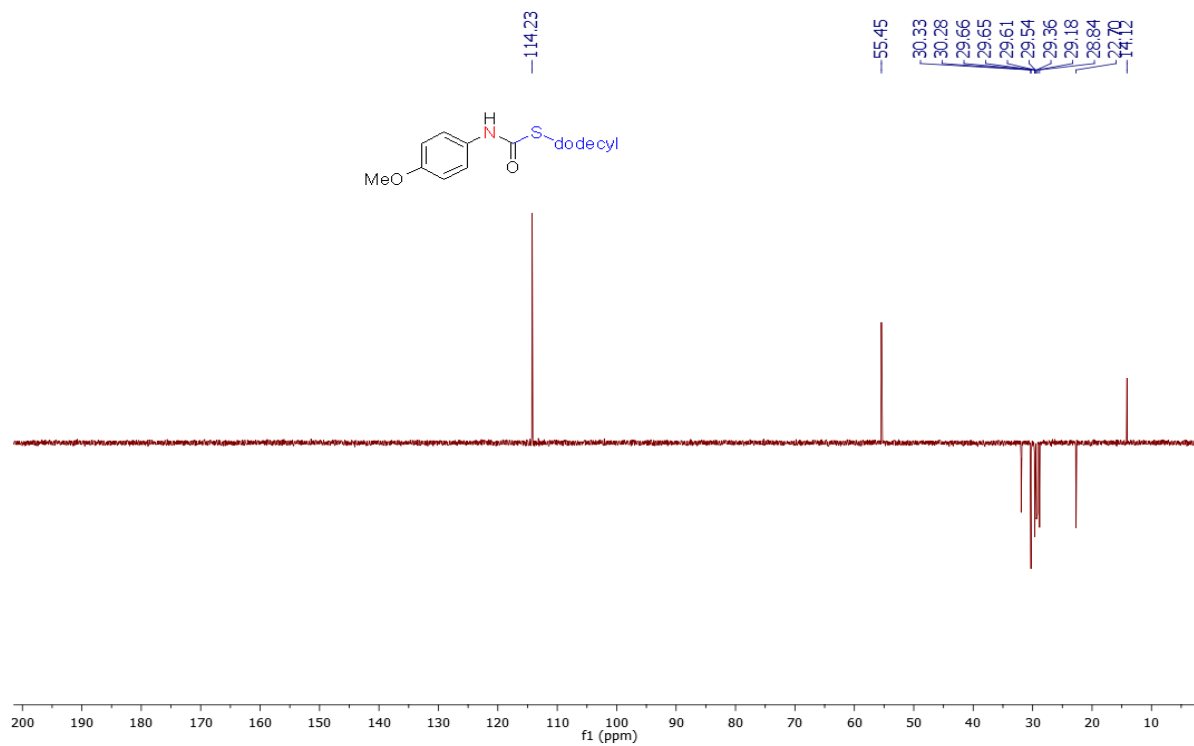

# HRMS (ESI-TOF) of compound (4j)

## Elemental Composition Report

Page 1

### Single Mass Analysis

Tolerance = 3.0 PPM / DBE: min = -1.5, max = 50.0  
Element prediction: Off  
Number of isotope peaks used for i-FIT = 3

Monoisotopic Mass, Even Electron Ions

13 formula(e) evaluated with 1 results within limits (up to 3 closest results for each mass)

Elements Used:

C: 0-20 H: 0-200 N: 0-1 O: 0-2 S: 0-1

F-158

291021\_11 14 (0.293) Cm (14:16)

QMI DIVISION, CSIR-IIIM JAMMU  
Xevo G2-XS QTOF YFC2015

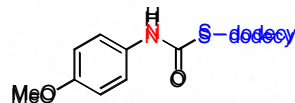

29-Oct-2021  
12:25:53  
1: TOF MS ES+  
5.29e+006

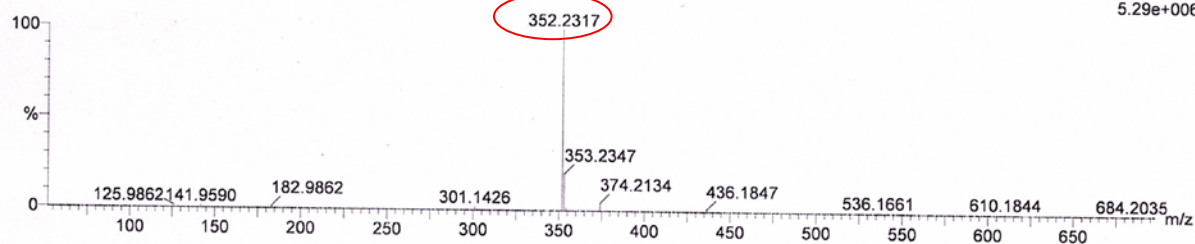

Minimum: -1.5  
Maximum: 2.0 3.0 50.0

| Mass     | Calc. Mass | mDa | PPM | DBE | i-FIT | Norm | Conf (%) | Formula        |
|----------|------------|-----|-----|-----|-------|------|----------|----------------|
| 352.2317 | 352.2310   | 0.7 | 2.0 | 4.5 | 37.7  | n/a  | n/a      | C20 H34 N O2 S |

# <sup>1</sup>H-NMR of S-dodecyl (4-cyanophenyl)carbamothioate (4k)

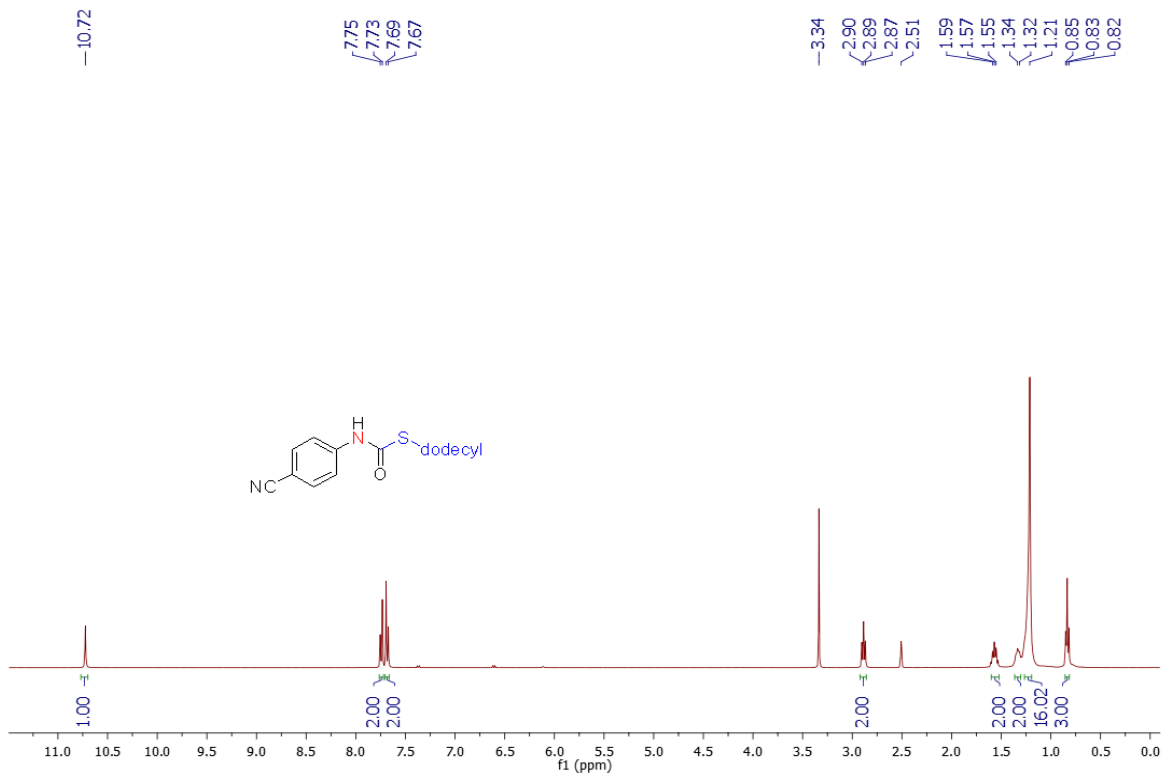

### <sup>13</sup>C-NMR of S-dodecyl (4-cyanophenyl)carbamothioate (4k)

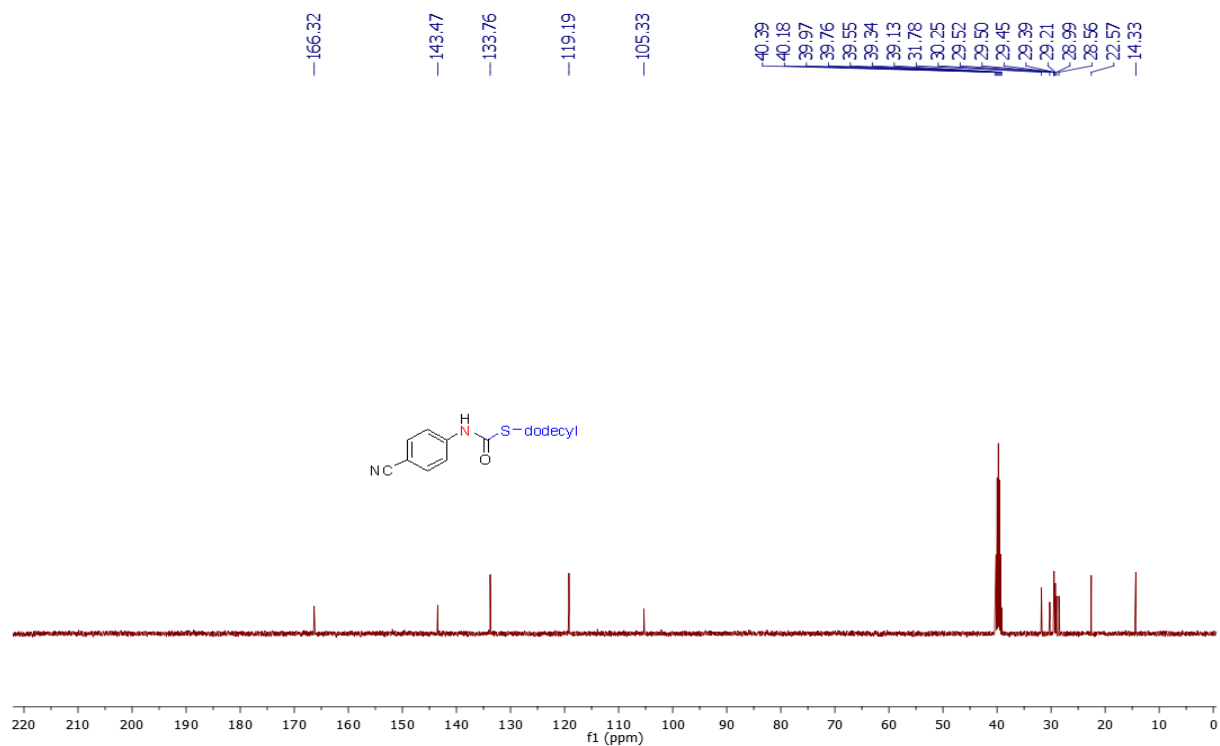

### DEPT of S-dodecyl (4-cyanophenyl)carbamothioate (4k)

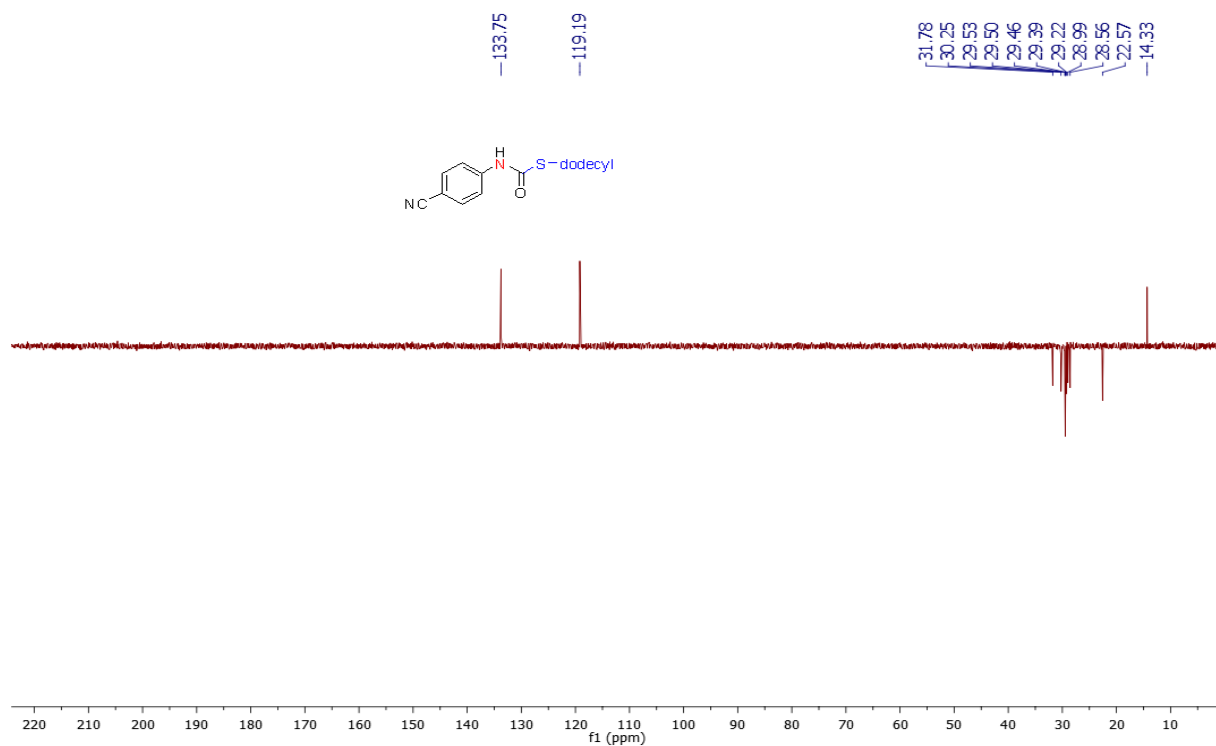

# HRMS (ESI-TOF) of compound (4k)

## Elemental Composition Report

Page

### Single Mass Analysis

Tolerance = 3.0 PPM / DBE: min = -1.5, max = 50.0

Element prediction: Off

Number of isotope peaks used for i-FIT = 3

Monoisotopic Mass, Even Electron Ions

13 formula(e) evaluated with 1 results within limits (up to 3 closest results for each mass)

Elements Used:

C: 0-20 H: 0-200 N: 0-2 O: 0-1 S: 0-1

Z: 12

QMI DIVISION, CSIR-IIIM JAMMU  
Xevo G2-XS QTOF YFC2015

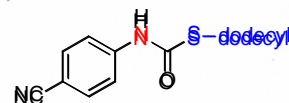

28-Oct-2021  
15:12:21  
1: TOF MS ES+  
7.92e+00e

281021\_16 7 (0.155) Cm (7:8)

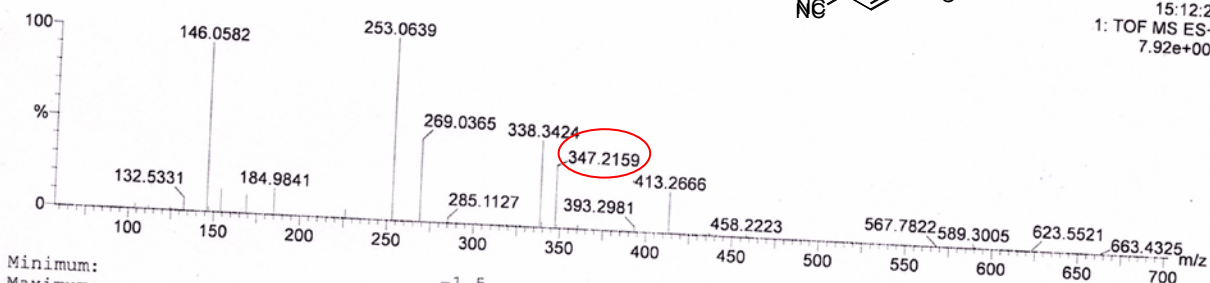

Minimum:

Maximum: 2.0 3.0 -1.5

| Mass     | Calc. Mass | mDa | PPM | DBE | i-FIT | Norm | Conf (%) | Formula        |
|----------|------------|-----|-----|-----|-------|------|----------|----------------|
| 347.2159 | 347.2157   | 0.2 | 0.6 | 6.5 | 36.1  | n/a  | n/a      | C20 H31 N2 O S |

# <sup>1</sup>H-NMR of S-hexadecyl (4-methoxyphenyl)carbamothioate (4l)

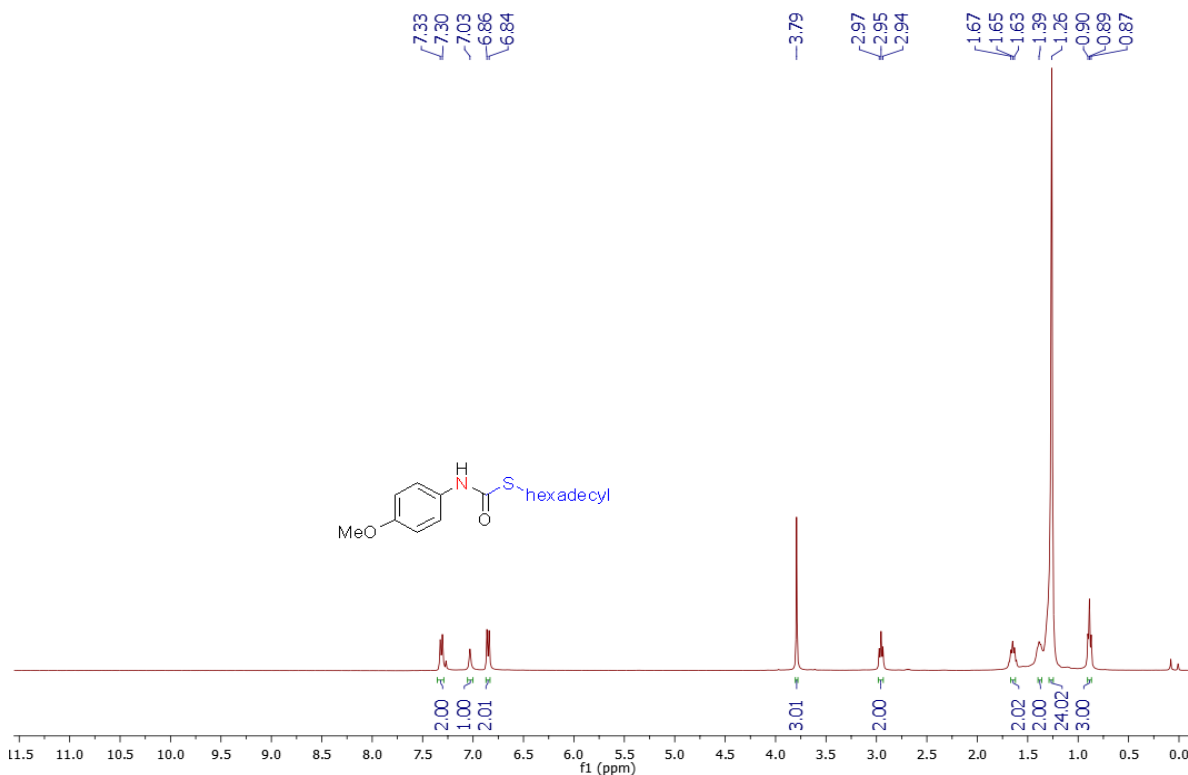



### <sup>13</sup>C-NMR of S-hexadecyl (4-methoxyphenyl)carbamothioate (4l)

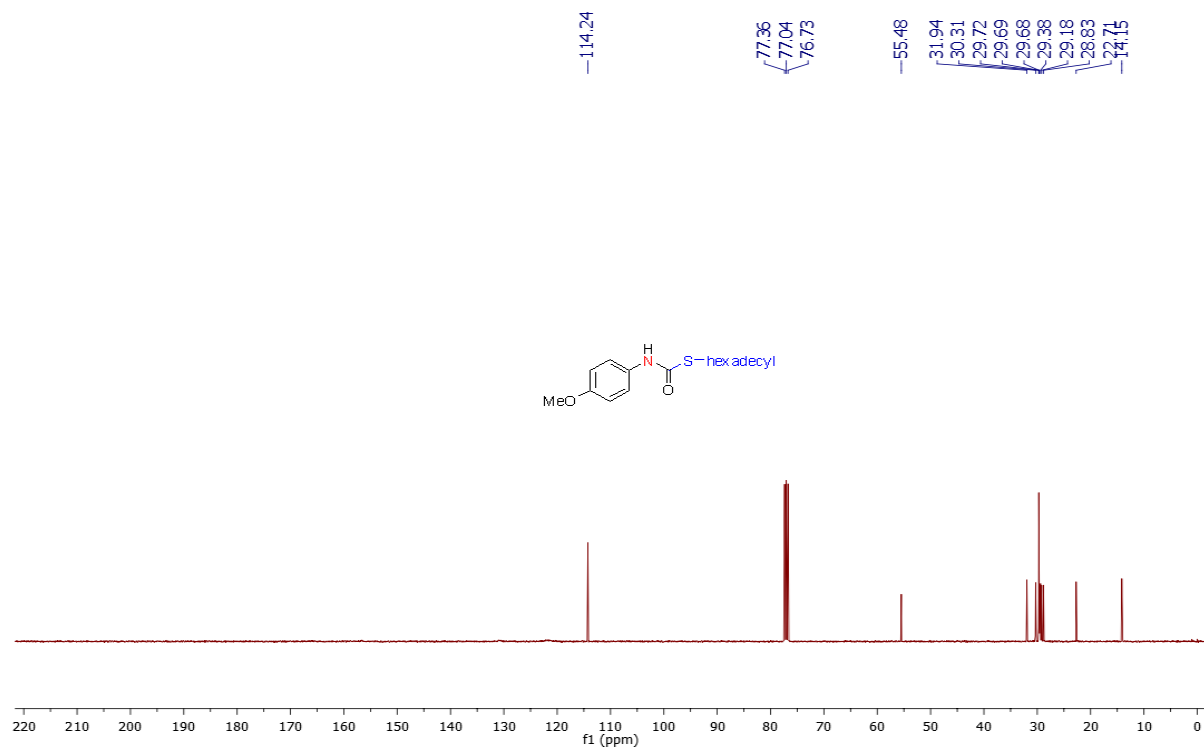

### DEPT of S-hexadecyl (4-methoxyphenyl)carbamothioate (4l)

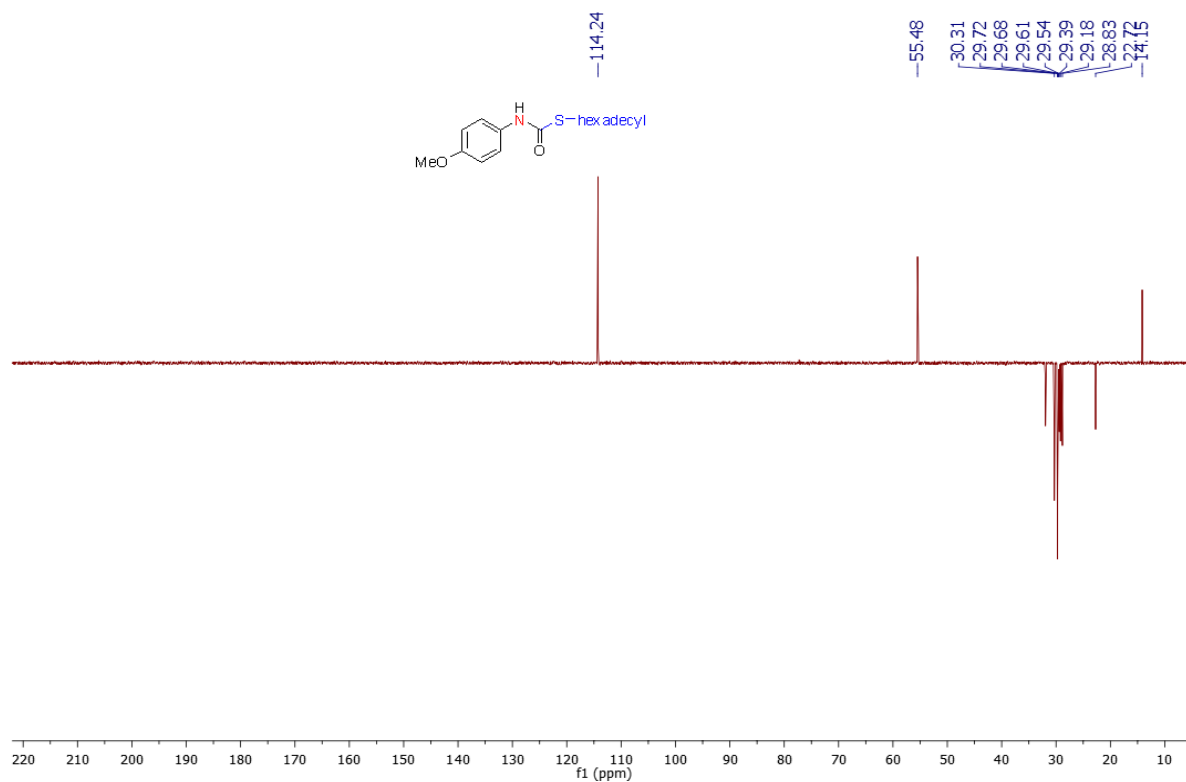

# HRMS (ESI-TOF) of compound (4l)

## Elemental Composition Report

Page 1

### Single Mass Analysis

Tolerance = 3.0 PPM / DBE: min = -1.5, max = 50.0

Element prediction: Off

Number of isotope peaks used for i-FIT = 3

Monoisotopic Mass, Even Electron Ions

13 formula(e) evaluated with 1 results within limits (up to 3 closest results for each mass)

Elements Used:

C: 0-24 H: 0-200 N: 0-1 O: 0-2 S: 0-1

F-159

291021\_06 9 (0.208) Cm (9:10)

QMI DIVISION, CSIR-IIIM JAMMU  
Xevo G2-XS QTOF YFC2015

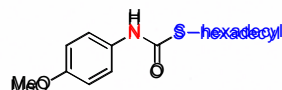

29-Oct-2021  
12:12:39  
1: TOF MS ES+  
1.58e+006

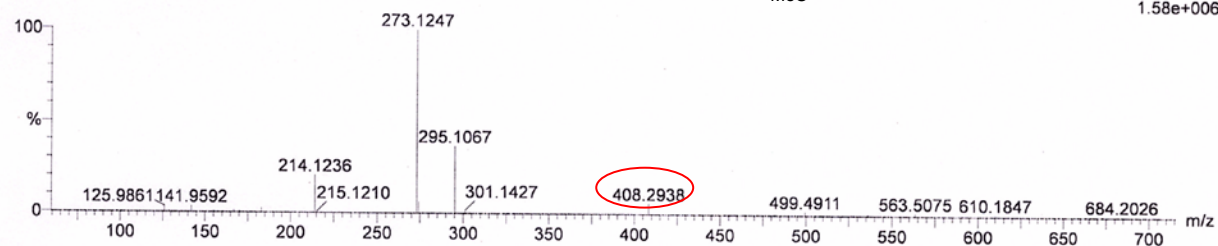

Minimum: -1.5  
Maximum: 2.0 3.0 50.0

| Mass     | Calc. Mass | mDa | PPM | DBE | i-FIT | Norm | Conf (%) | Formula                                            |
|----------|------------|-----|-----|-----|-------|------|----------|----------------------------------------------------|
| 408.2938 | 408.2936   | 0.2 | 0.5 | 4.5 | 37.4  | n/a  | n/a      | C <sub>24</sub> H <sub>42</sub> N O <sub>2</sub> S |

# <sup>1</sup>H-NMR of phenyl (*E*)-styrylcarbamate (4m)

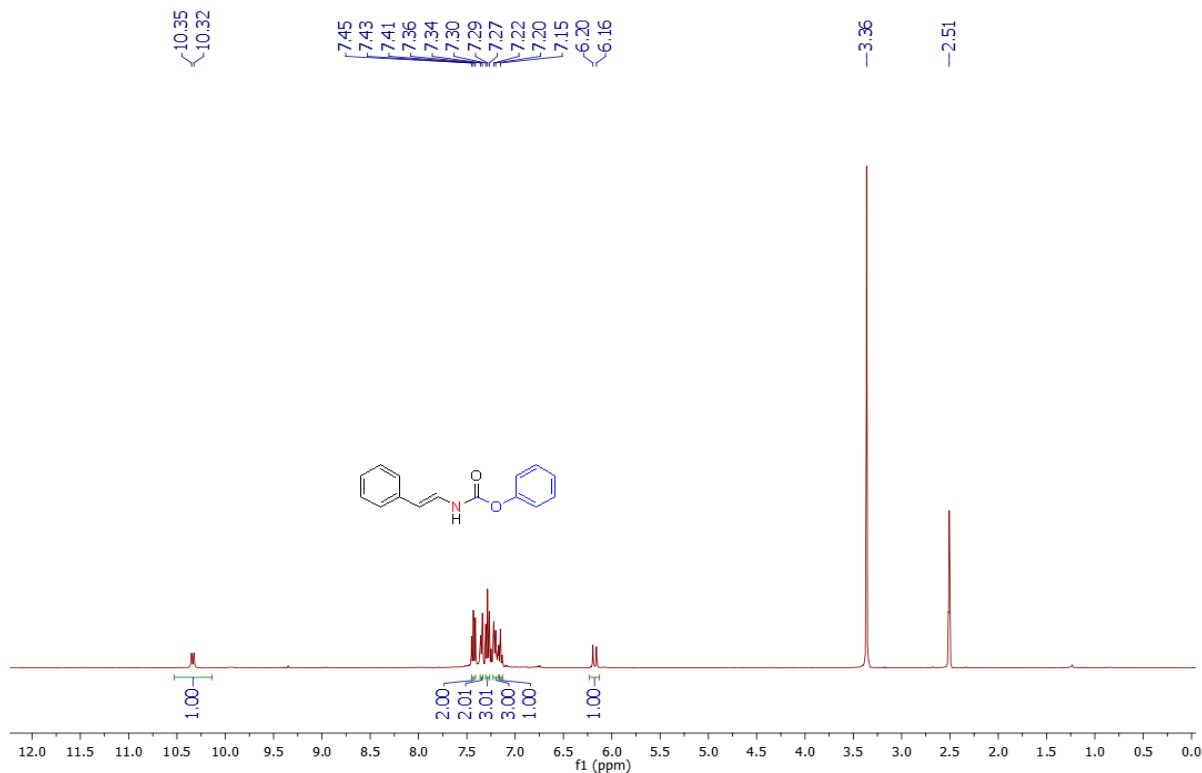

### <sup>13</sup>C-NMR of phenyl (*E*)-styrylcarbamate (4m)

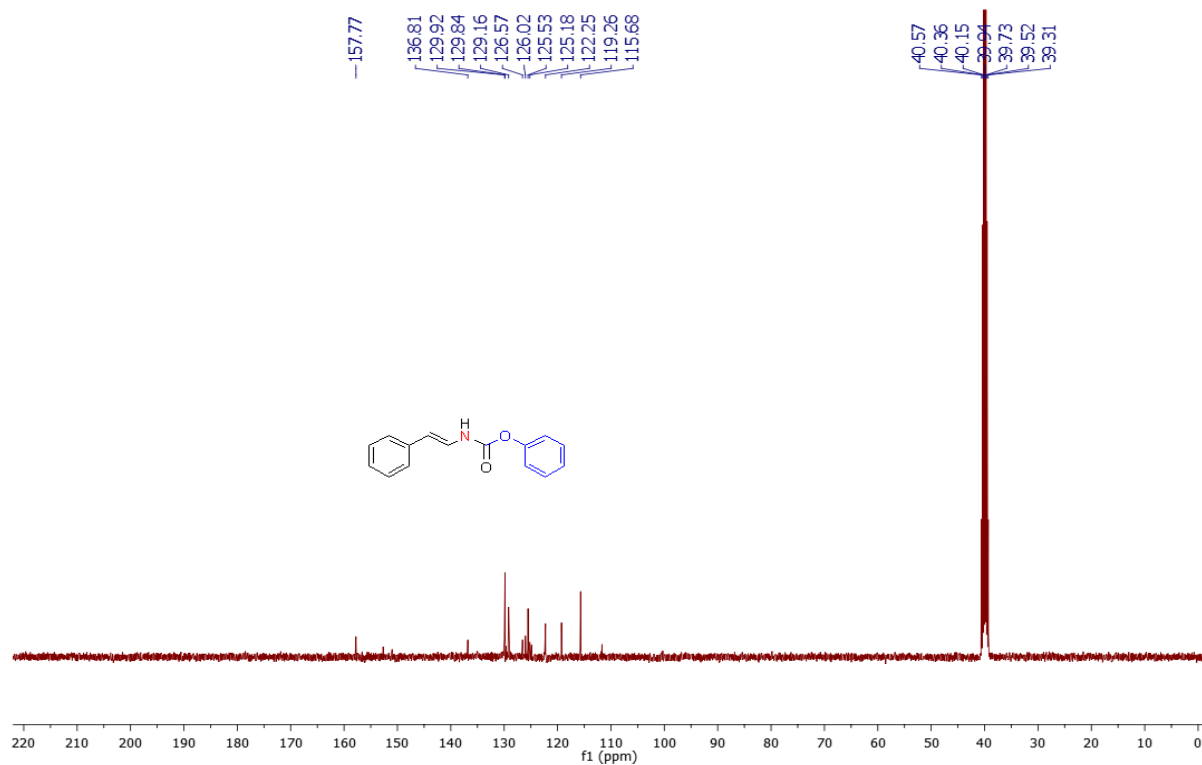

### DEPT of phenyl (*E*)-styrylcarbamate (4m)

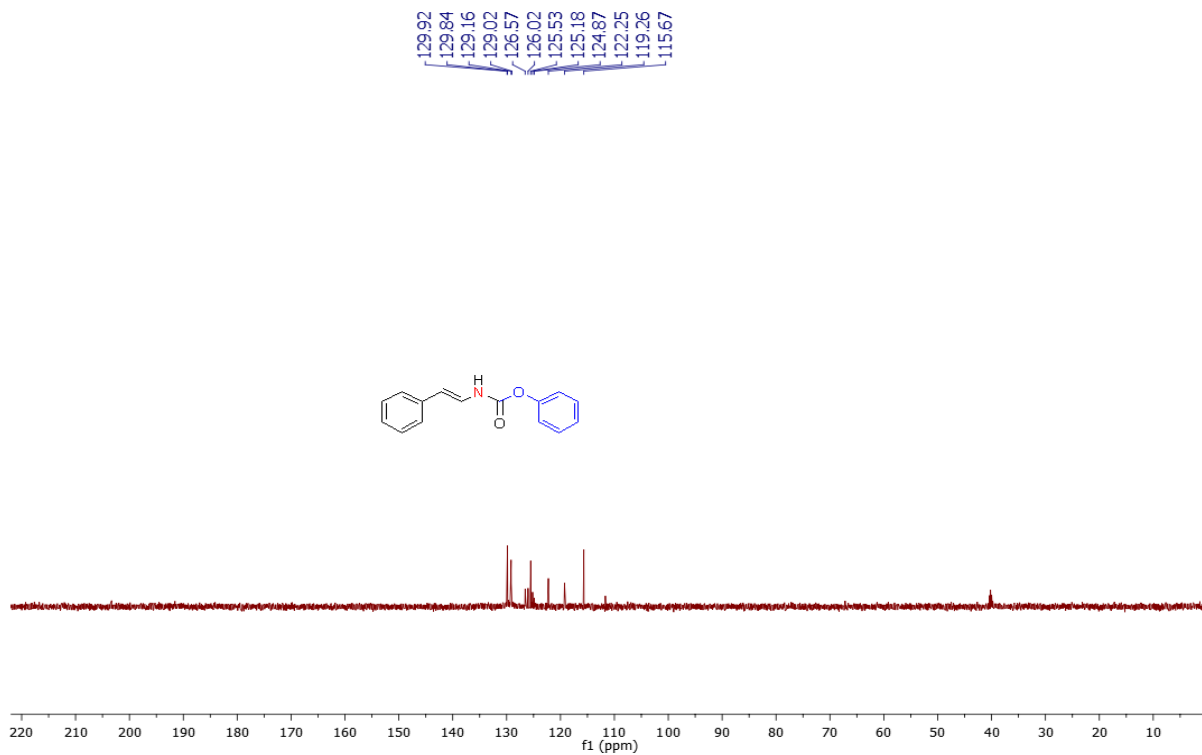

## HRMS of phenyl (*E*)-styrylcarbamate (4m)

### Elemental Composition Report

Page 1

### Single Mass Analysis

Tolerance = 5.0 PPM / DBE: min = -1.5, max = 50.0

Element prediction: Off

Number of isotope peaks used for i-FIT = 3

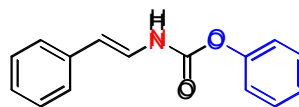

Monoisotopic Mass, Even Electron Ions

9 formula(e) evaluated with 1 results within limits (up to 3 closest results for each mass)

Elements Used:

C: 0-15 H: 0-200 N: 0-1 O: 0-2

ACM 41

QMI DIVISION, CSIR-IIIM JAMMU  
Xevo G2-XS QTOF YFC2015

28-Jan-2022

12:30:55

1. TOF MS ES+

1.42e+006

280122\_22 8 (0.172) Cm (8)

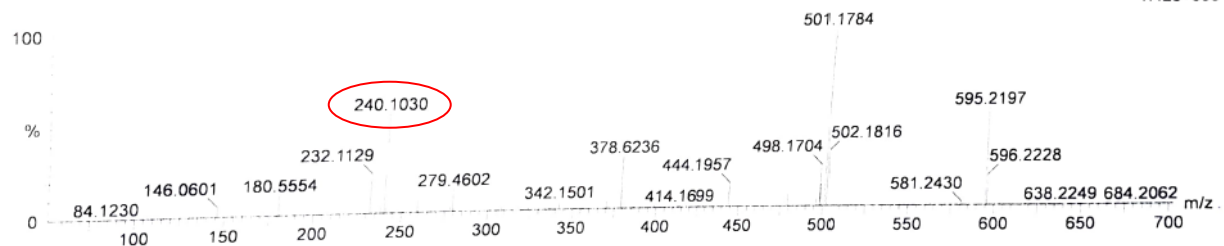

Minimum: -1.5  
Maximum: 50.0

| Mass     | Calc. Mass | mDa | PPM | DBE | i-FIT | Norm | Conf (%) | Formula      |
|----------|------------|-----|-----|-----|-------|------|----------|--------------|
| 240.1030 | 240.1025   | 0.5 | 2.1 | 9.5 | 44.8  | n/a  | n/a      | C15 H14 N O2 |

## <sup>1</sup>H-NMR of S-hexadecyl (*E*)-styrylcarbamothioate (4n)

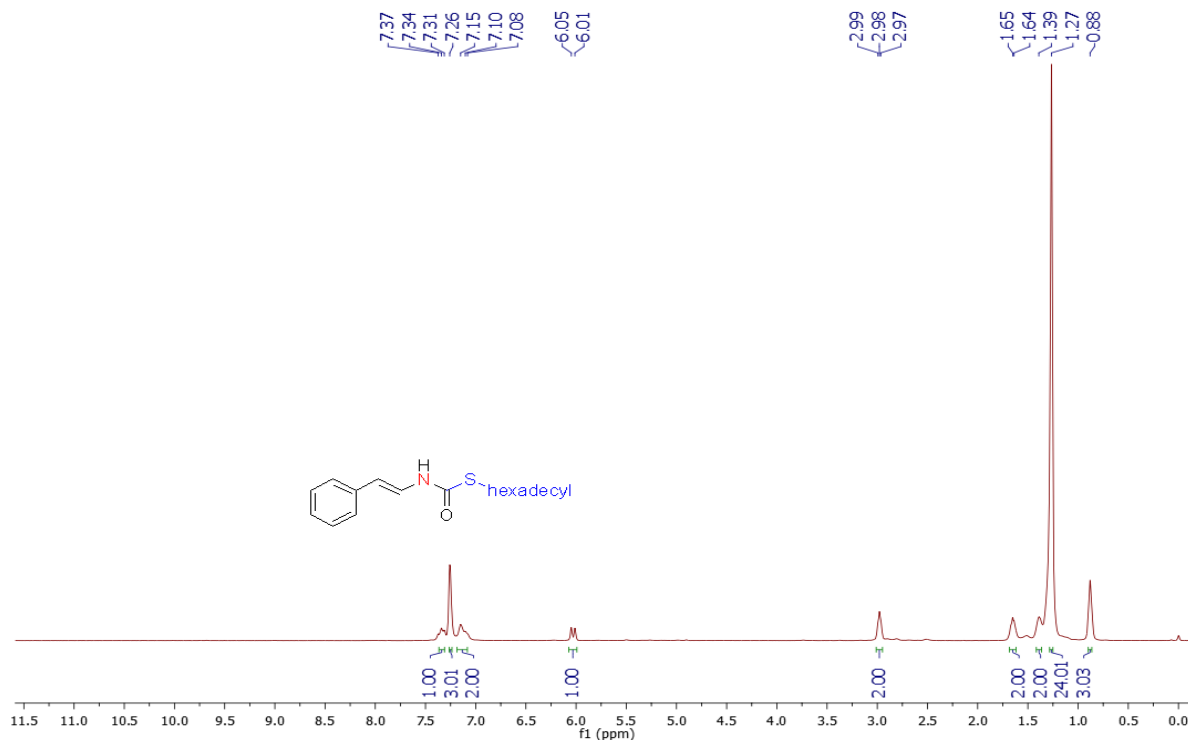

S140

### <sup>13</sup>C-NMR of S-hexadecyl (*E*)-styrylcarbamothioate (4n)

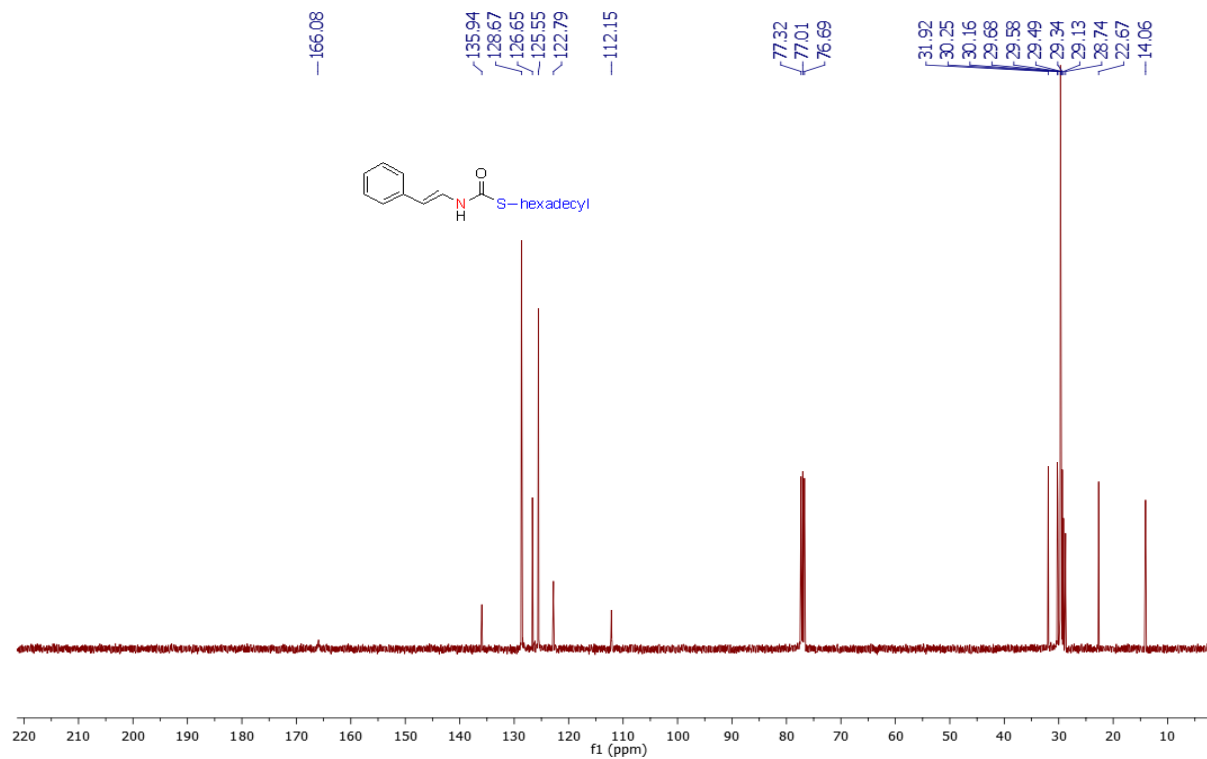

### DEPT of S-hexadecyl (*E*)-styrylcarbamothioate (4n)

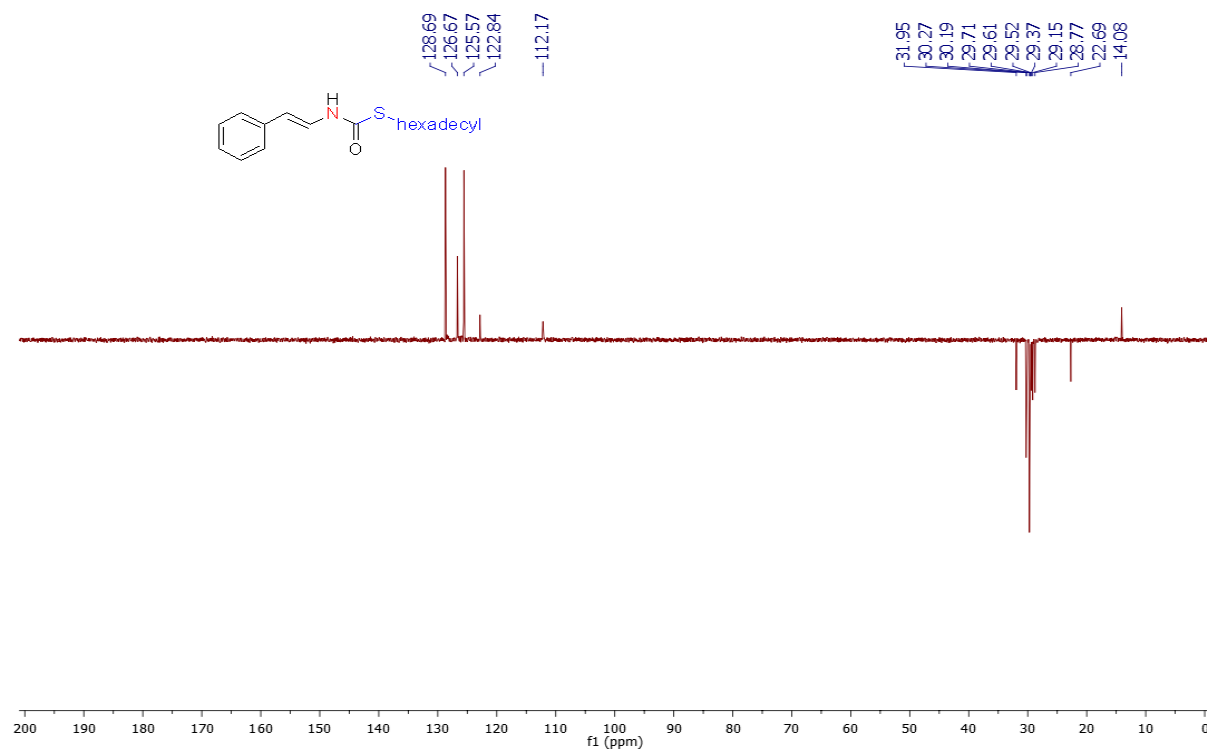

# HRMS (ESI-TOF) of compound (4n)

## Elemental Composition Report

### Single Mass Analysis

Tolerance = 3.0 PPM / DBE: min = -1.5, max = 50.0  
Element prediction: Off  
Number of isotope peaks used for i-FIT = 3

Monoisotopic Mass, Even Electron Ions

9 formula(e) evaluated with 1 results within limits (up to 3 closest results for each mass)

Elements Used:

C: 0-25 H: 0-200 N: 0-1 O: 0-1 S: 0-1

F-186 B

291021\_04 16 (0.327) Cm (16:17)

QMI DIVISION, CSIR-IIIM JAMMU  
Xevo G2-XS QTOF YFC2015

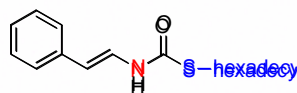

29-Oct-2021  
12:06:48  
1: TOF MS ES+  
2.04e+005

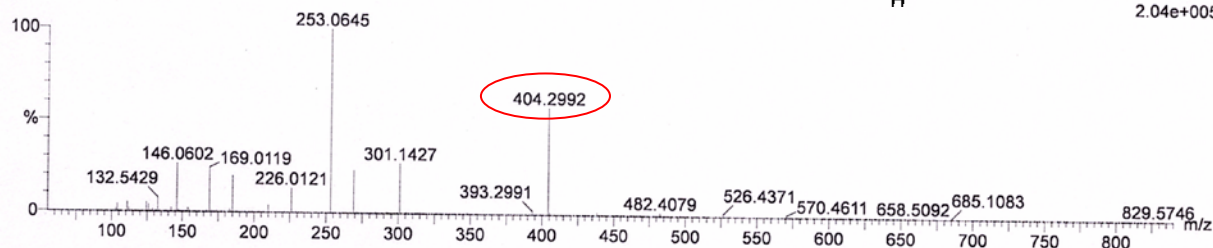

Minimum: -1.5  
Maximum: 2.0 3.0 50.0

| Mass     | Calc. Mass | mDa | PPM | DBE | i-FIT | Norm | Conf (%) | Formula       |
|----------|------------|-----|-----|-----|-------|------|----------|---------------|
| 404.2992 | 404.2987   | 0.5 | 1.2 | 5.5 | 41.4  | n/a  | n/a      | C25 H42 N O S |

# <sup>1</sup>H-NMR of 4-methoxy-N-undecylbenzamide (5)

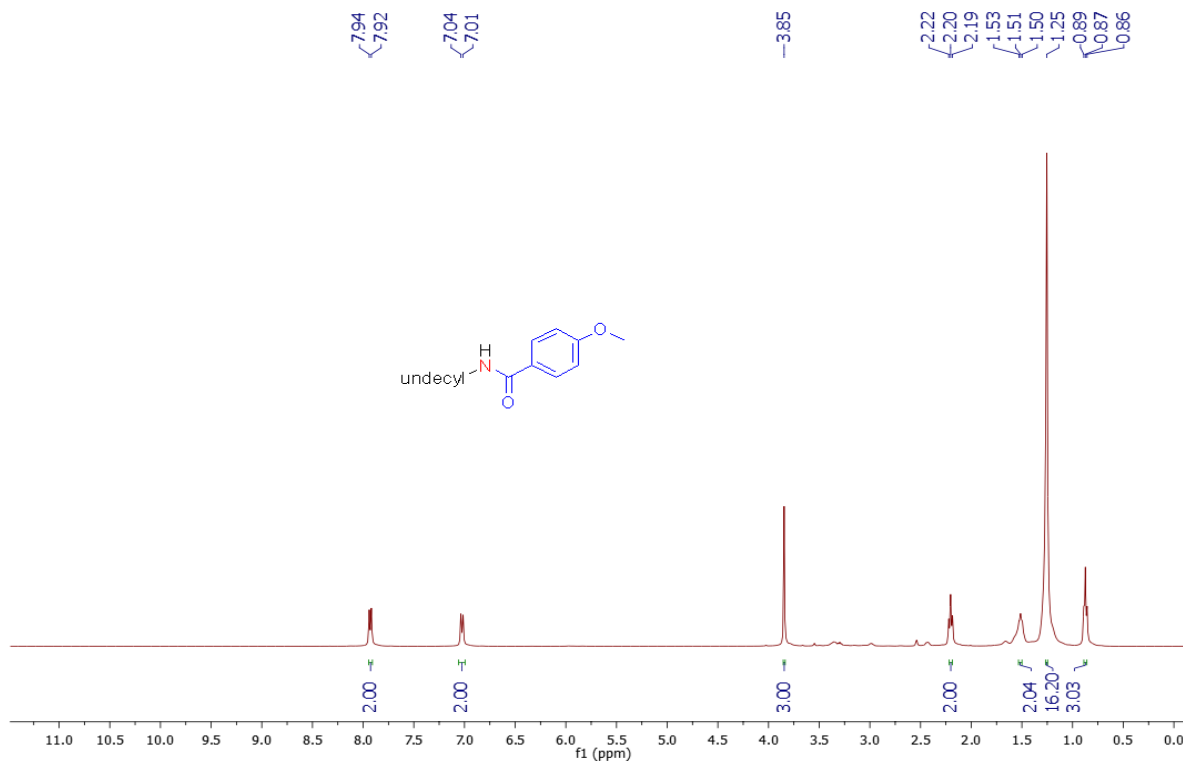

### <sup>13</sup>C-NMR of 4-methoxy-N-undecylbenzamide (5)

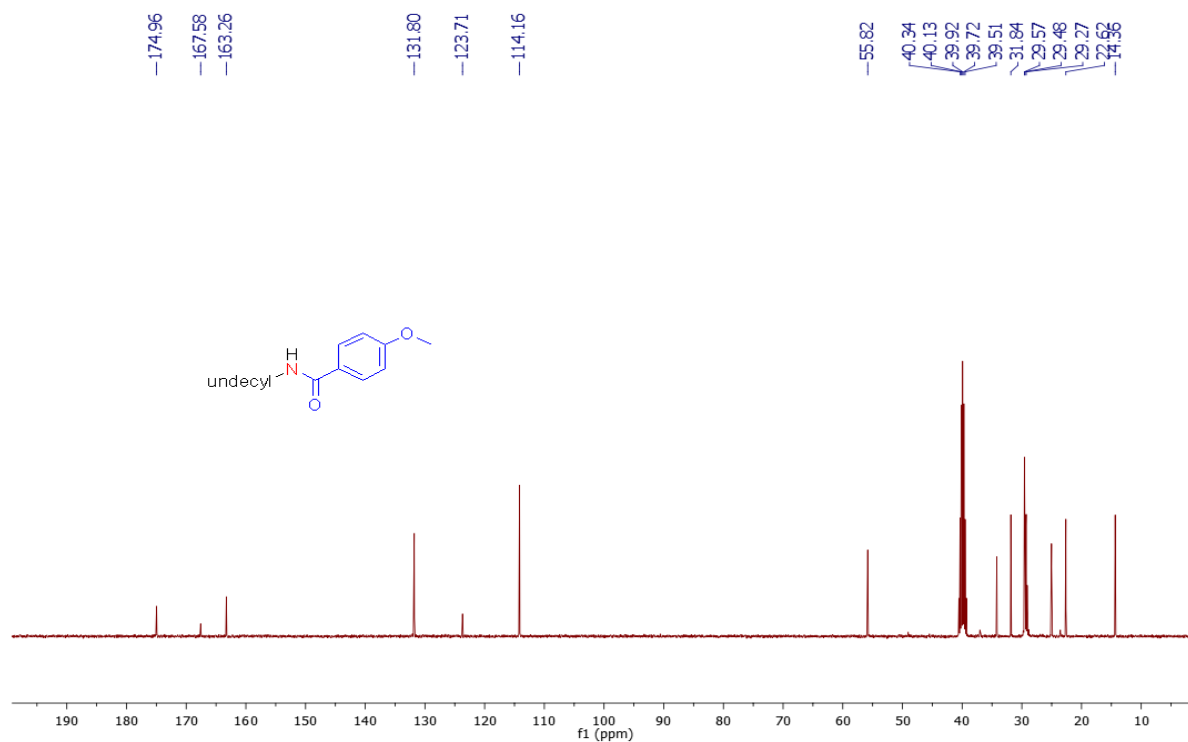

### DEPT of 4-methoxy-N-undecylbenzamide (5)

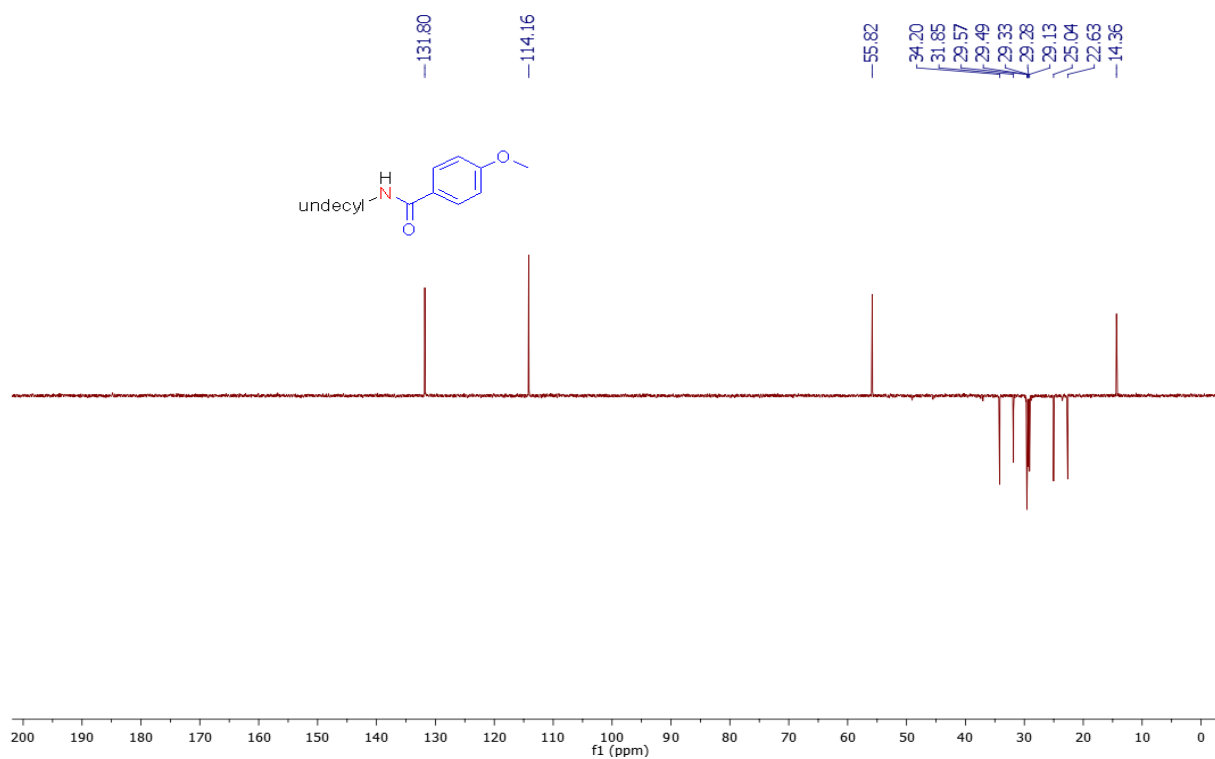

### <sup>1</sup>H-NMR of 1-(4-cyanophenyl)urea (6)

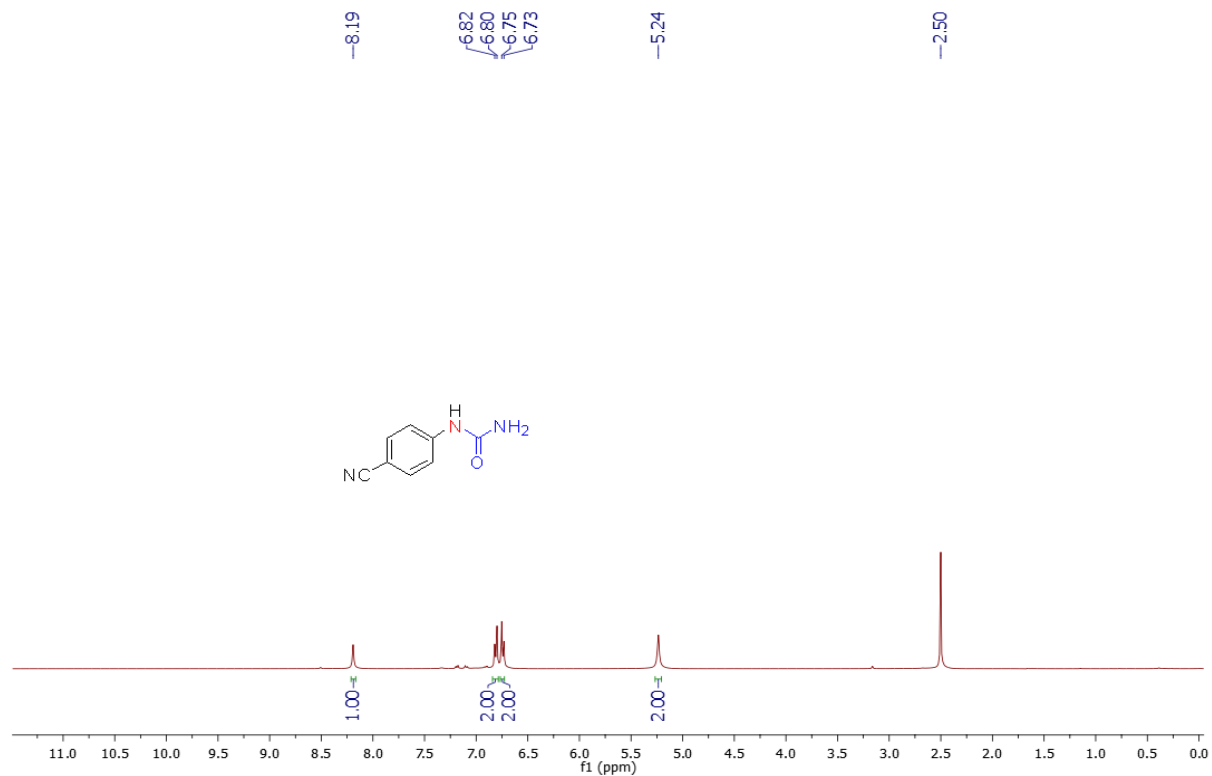

### <sup>13</sup>C-NMR of 1-(4-cyanophenyl)urea (6)

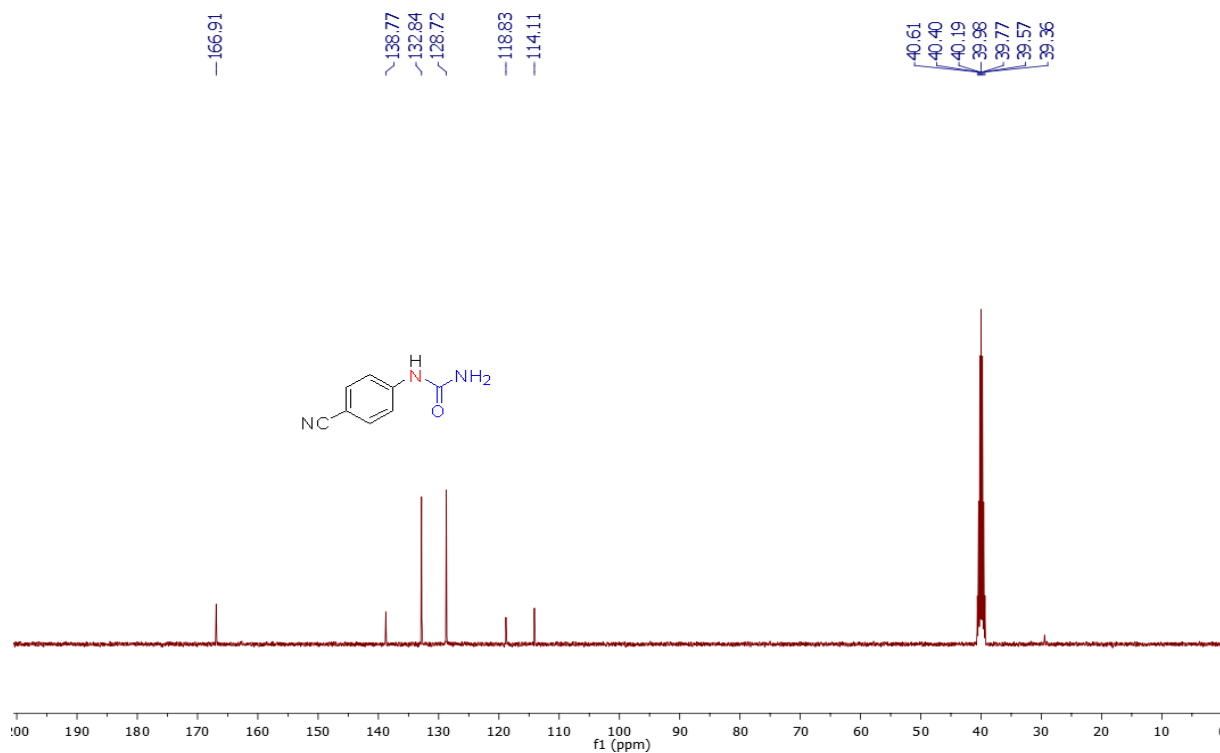



## DEPT of 1-(4-cyanophenyl)urea (6)

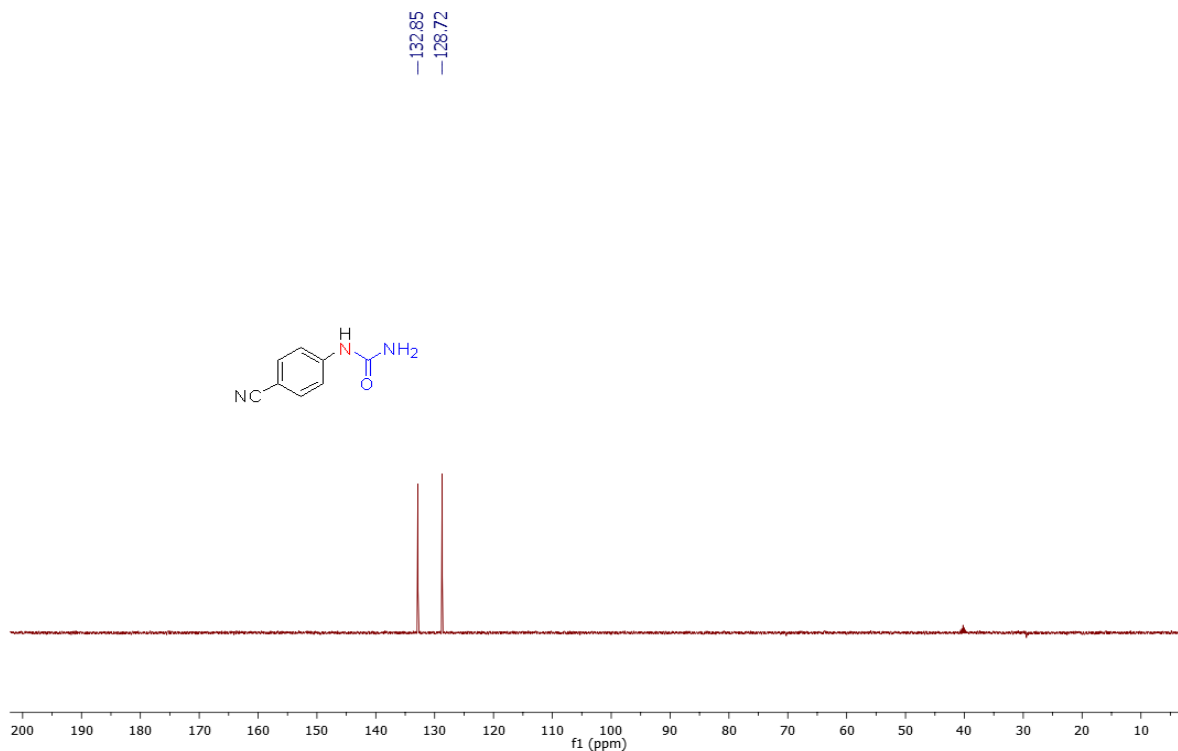

## HRMS (ESI-TOF) of compound (6)

### Elemental Composition Report

Page 1

#### Single Mass Analysis

Tolerance = 5.0 PPM / DBE: min = -1.5, max = 50.0

Element prediction: Off

Number of isotope peaks used for i-FIT = 3

Monoisotopic Mass, Even Electron Ions

9 formula(e) evaluated with 1 results within limits (up to 3 closest results for each mass)

Elements Used:

C: 0-8 H: 0-200 N: 0-3 O: 0-1

F-183

210921\_20 12 (0.259) Cm (12)

QMI DIVISION, CSIR-IIIM JAMMU  
Xevo G2-XS QTOF YFC2015

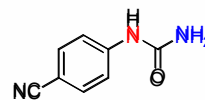

21-Sep-2021  
12:57:36  
1: TOF MS ES+  
7.97e+004

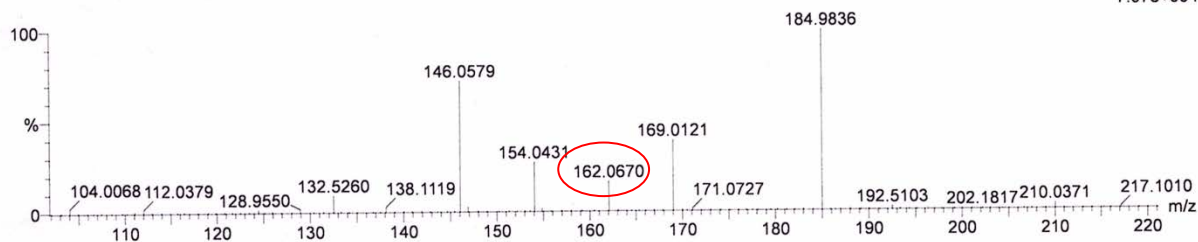

Minimum: -1.5  
Maximum: 50.0

| Mass     | Calc. Mass | mDa | PPM | DBE | i-FIT | Norm | Conf (%) | Formula    |
|----------|------------|-----|-----|-----|-------|------|----------|------------|
| 162.0670 | 162.0667   | 0.3 | 1.9 | 6.5 | 42.2  | n/a  | n/a      | C8 H8 N3 O |

### <sup>1</sup>H-NMR of 4-aminobenzonitrile (7a)

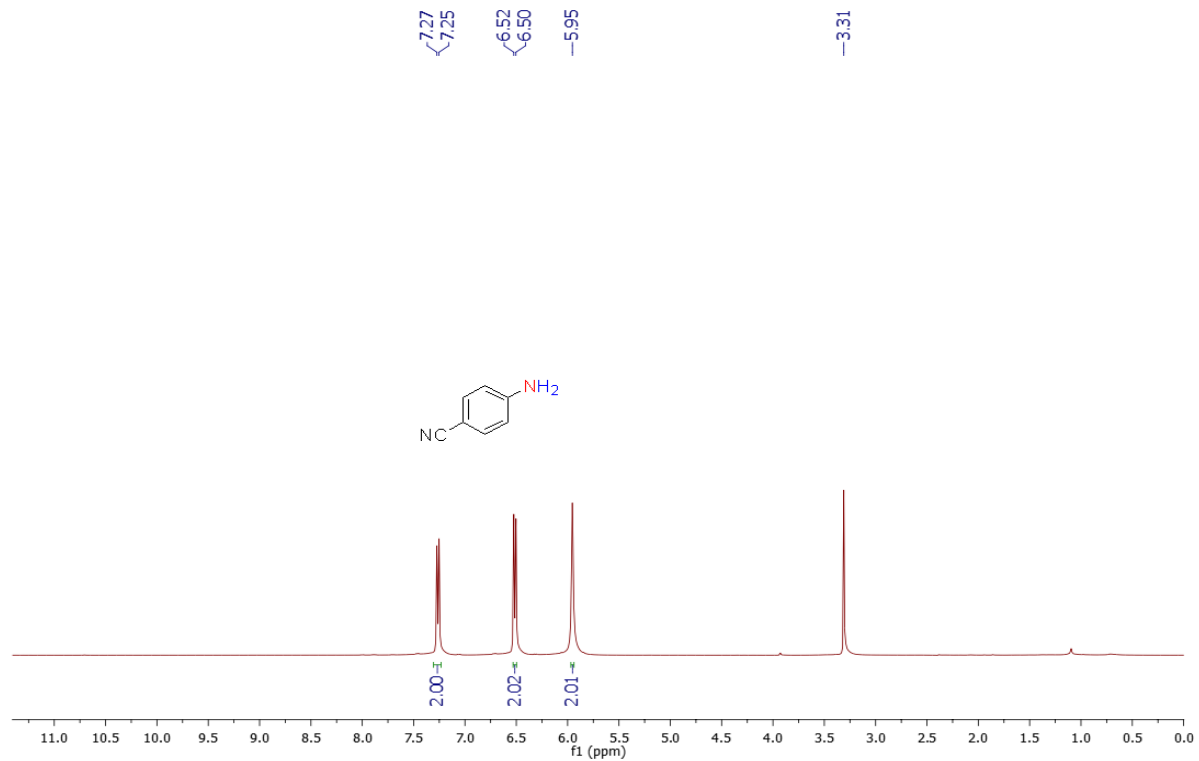

### <sup>13</sup>C-NMR of 4-aminobenzonitrile (7a)

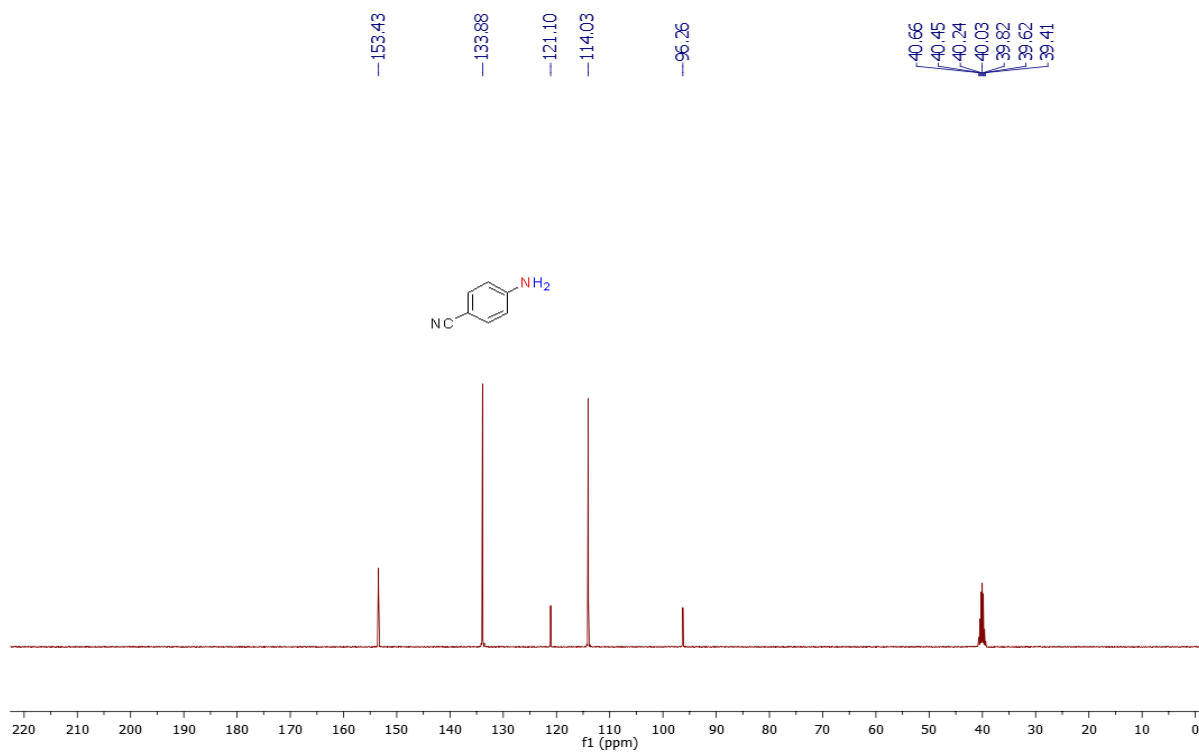

## DEPT of 4-aminobenzonitrile (7a)

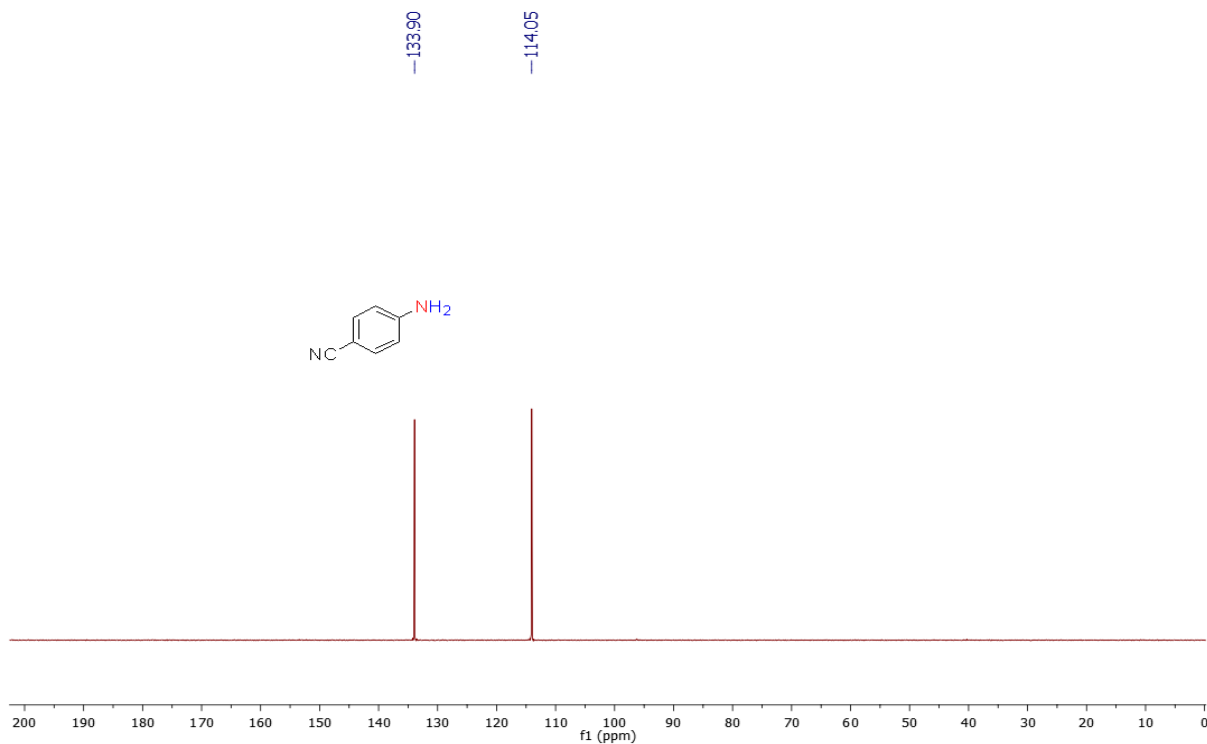

## HRMS (ESI-TOF) of compound (7a)

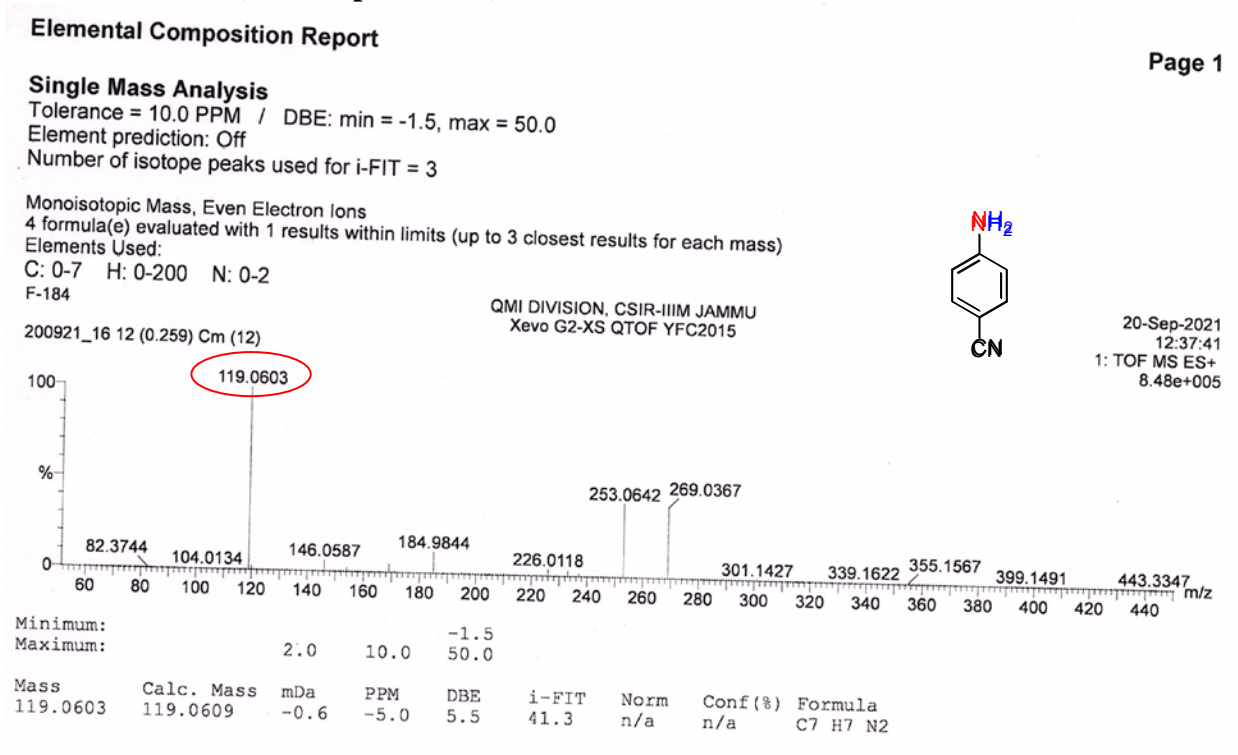

### <sup>1</sup>H-NMR of 4-chloroaniline (7b)

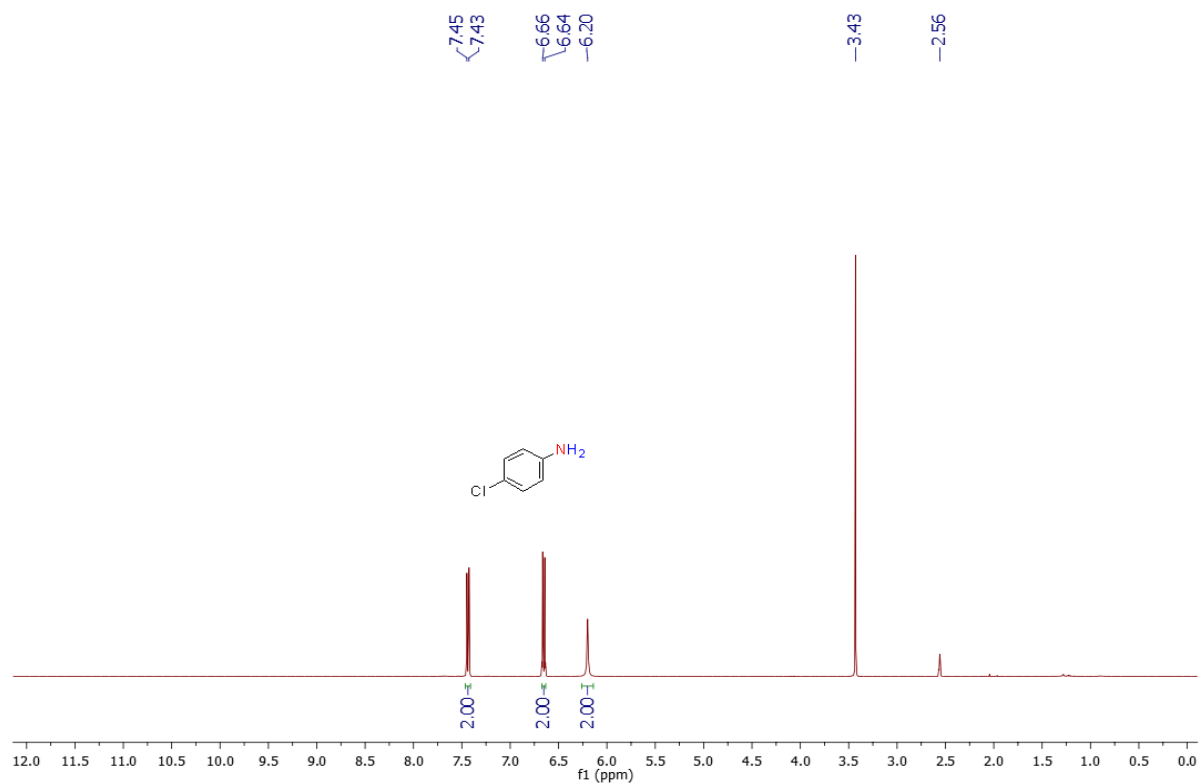

### <sup>13</sup>C-NMR of 4-chloroaniline (7b)

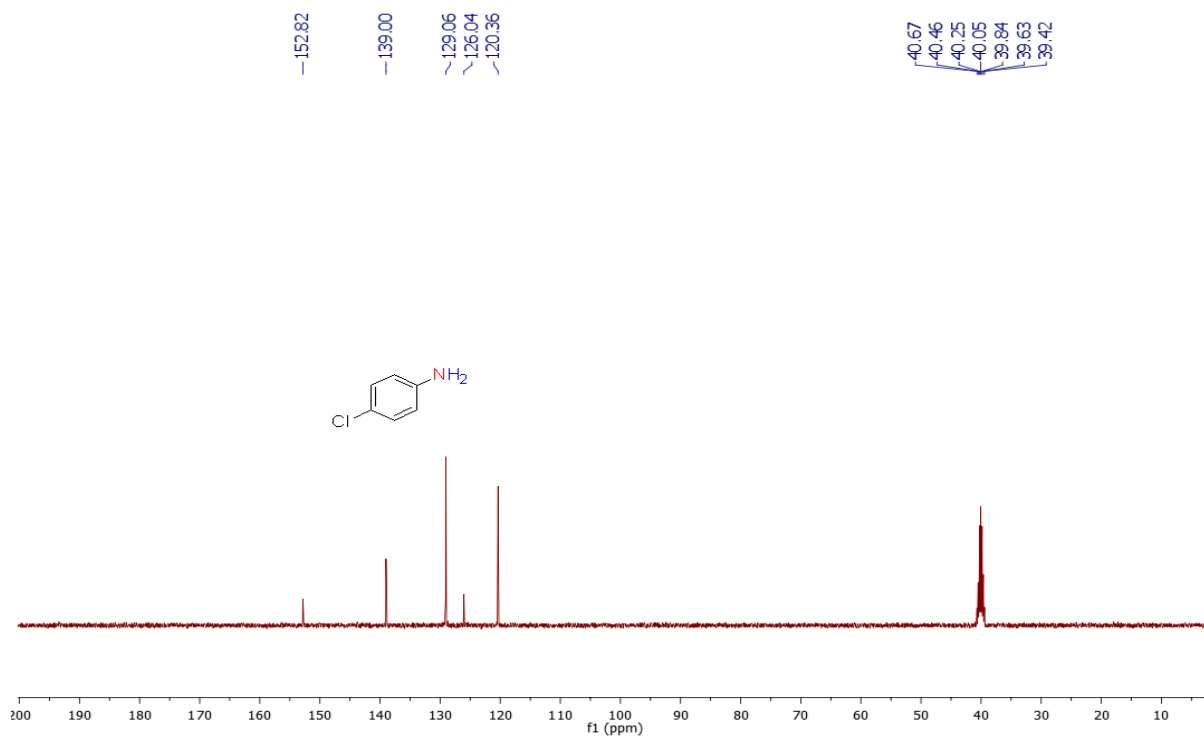

### DEPT of 4-chloroaniline (7b)

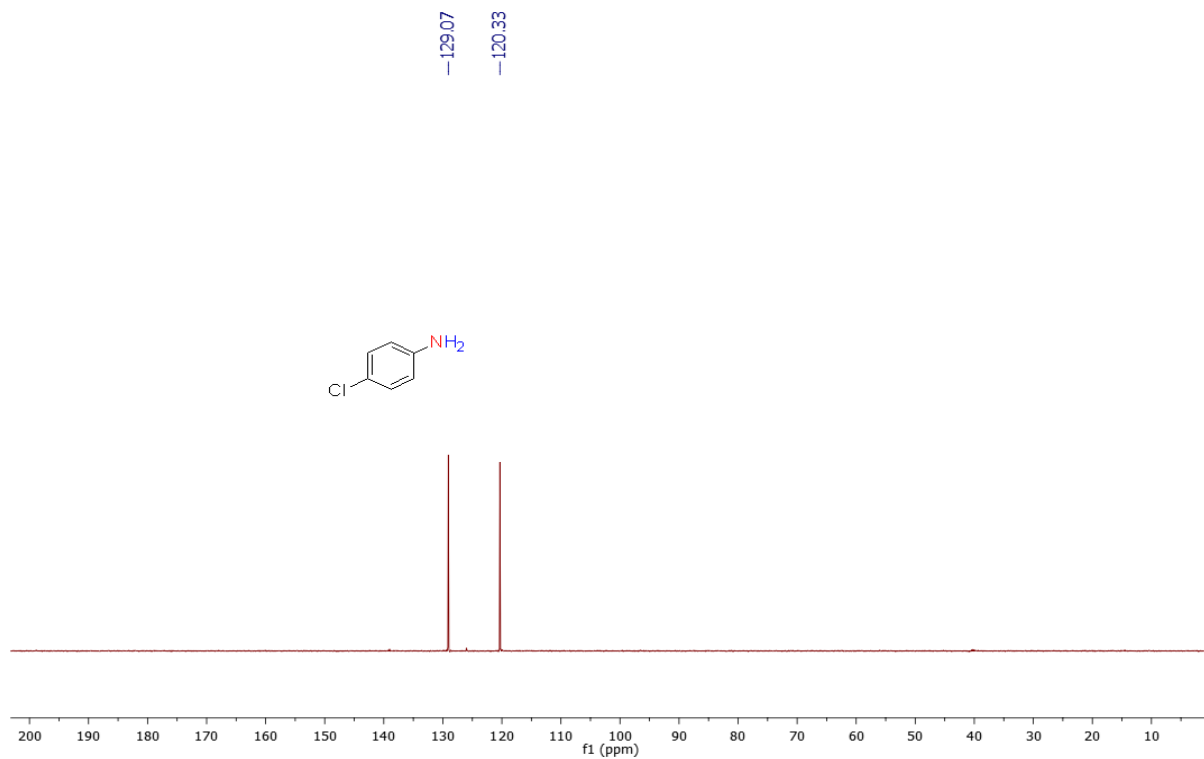

### <sup>1</sup>H-NMR of aniline (7c)

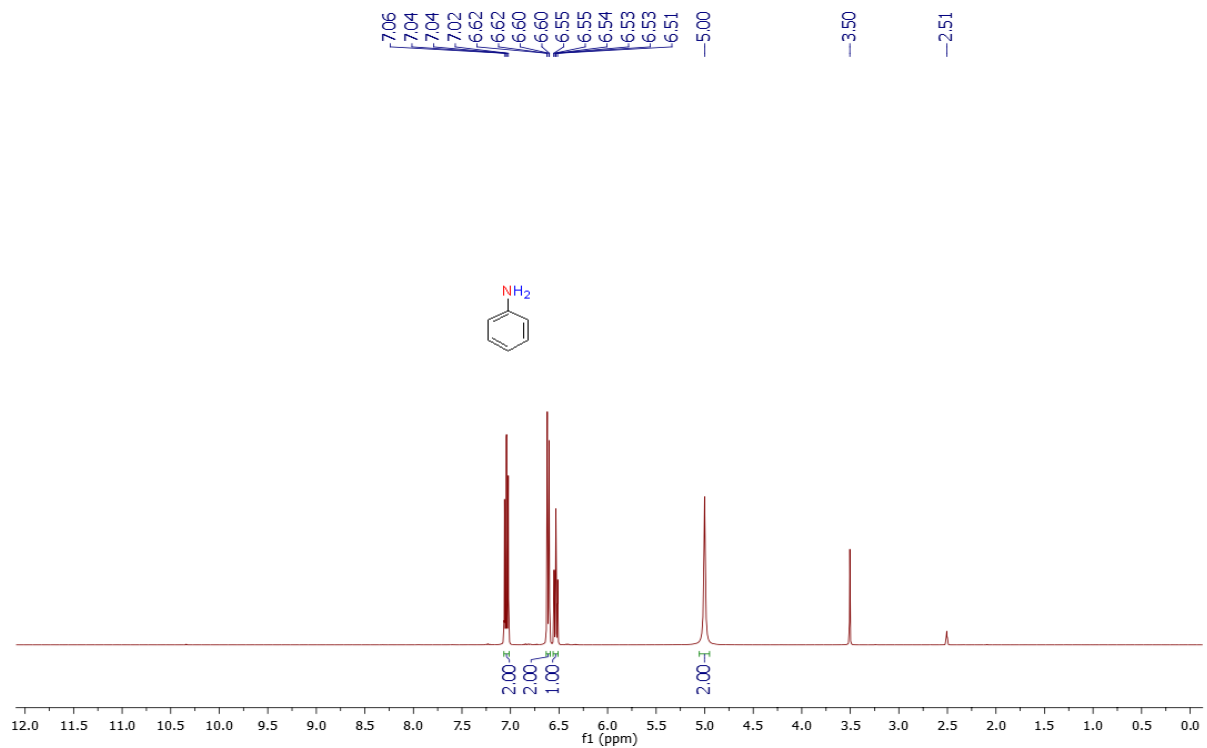

### <sup>13</sup>C-NMR of aniline (7c)

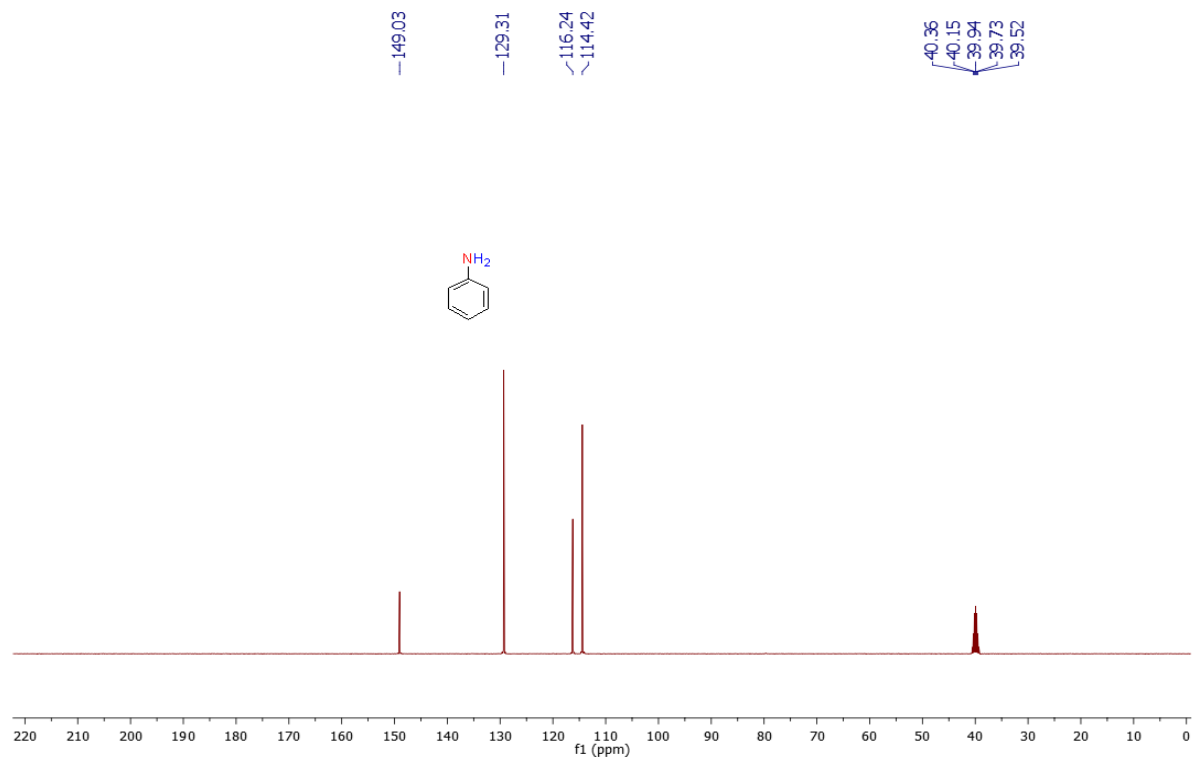

### DEPT of aniline (7c)

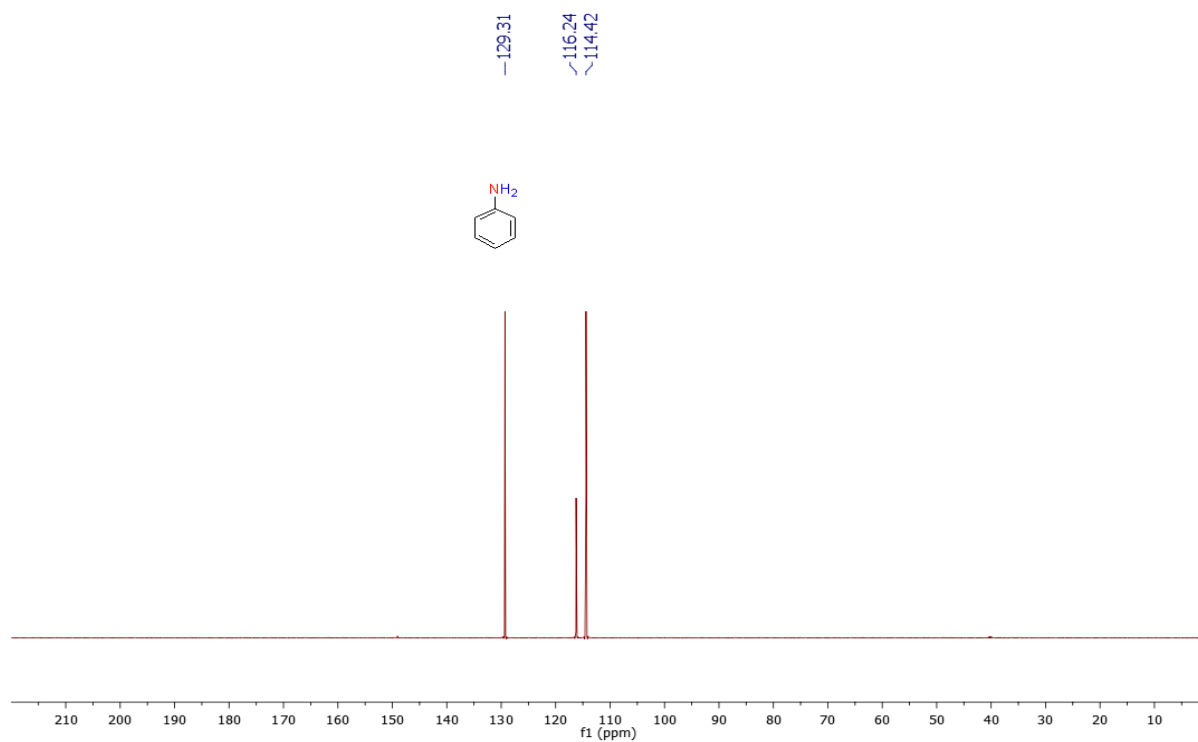

### <sup>1</sup>H-NMR of 4-methoxyaniline (7d)

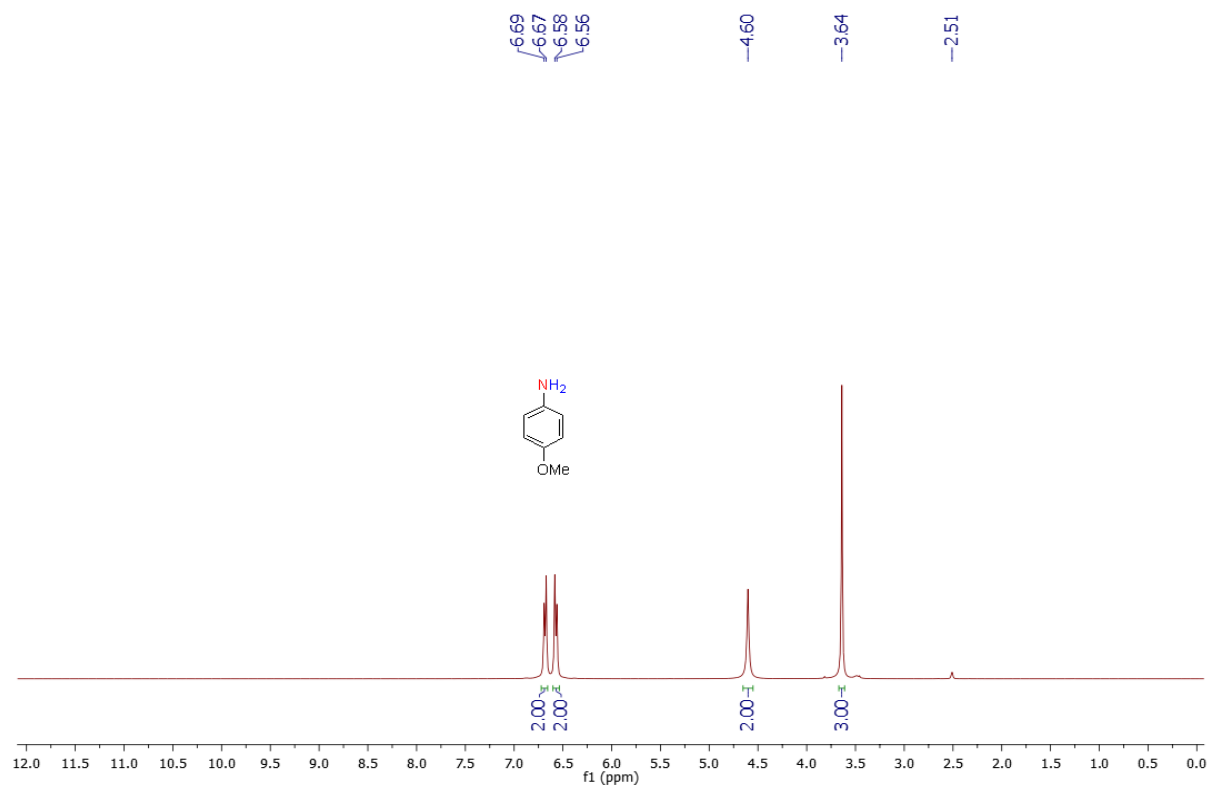

### <sup>13</sup>C-NMR of 4-methoxyaniline (7d)

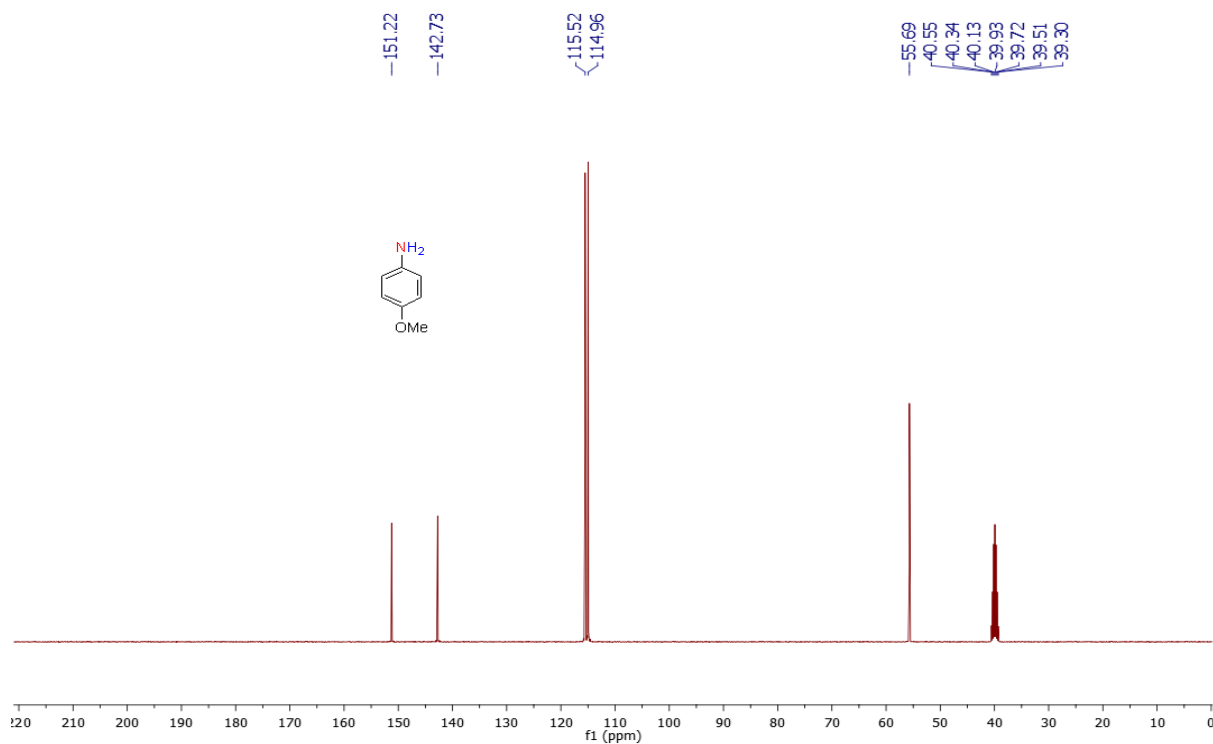

## DEPT of 4-methoxyaniline (7d)

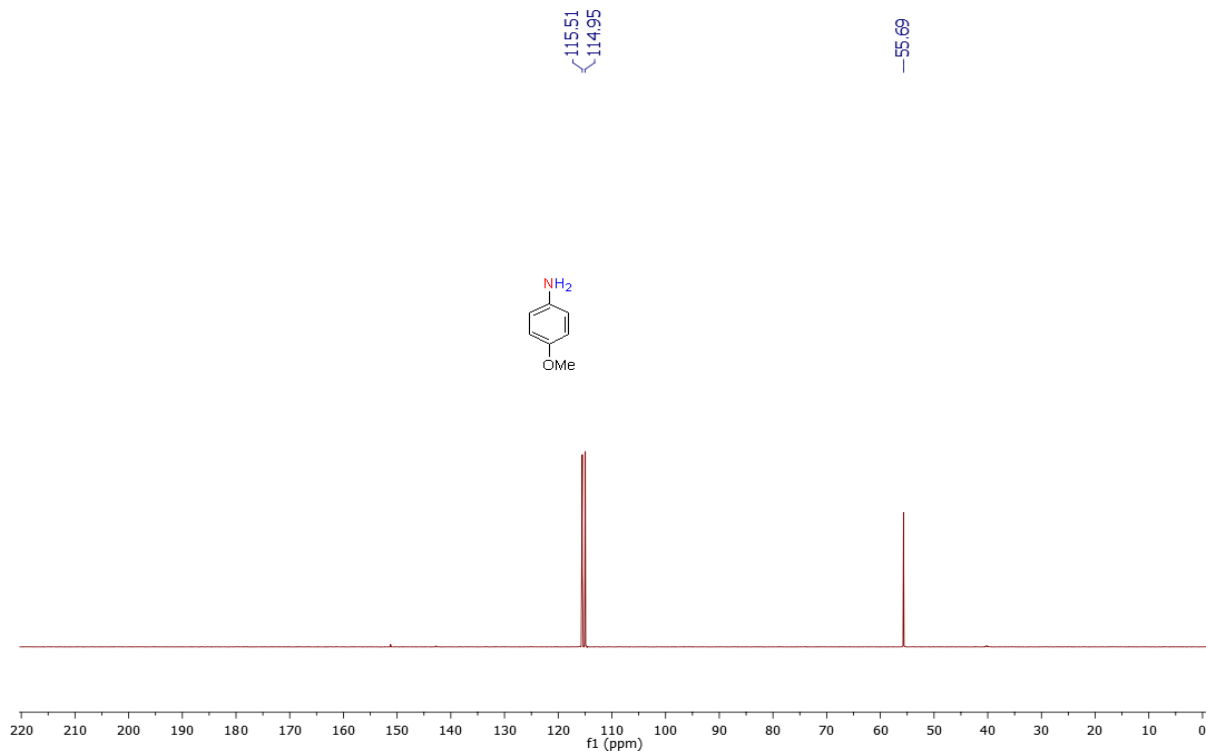

## HRMS of 4-methoxyaniline (7d)

### Elemental Composition Report

Page 1

#### Single Mass Analysis

Tolerance = 5.0 PPM / DBE: min = -1.5, max = 50.0

Element prediction: Off

Number of isotope peaks used for i-FIT = 3

Monoisotopic Mass, Even Electron Ions

28 formula(e) evaluated with 1 results within limits (up to 3 closest results for each mass)

Elements Used:

C: 0-7 H: 0-200 N: 0-2 O: 0-5

F-193

QMI DIVISION, CSIR-IIIM JAMMU  
Xevo G2-XS QTOF YFC2015

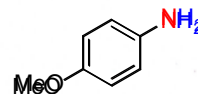

29-Dec-2021

13:34:46

1: TOF MS ES+

2.27e+006

291221\_38 9 (0.208) Cm (9)

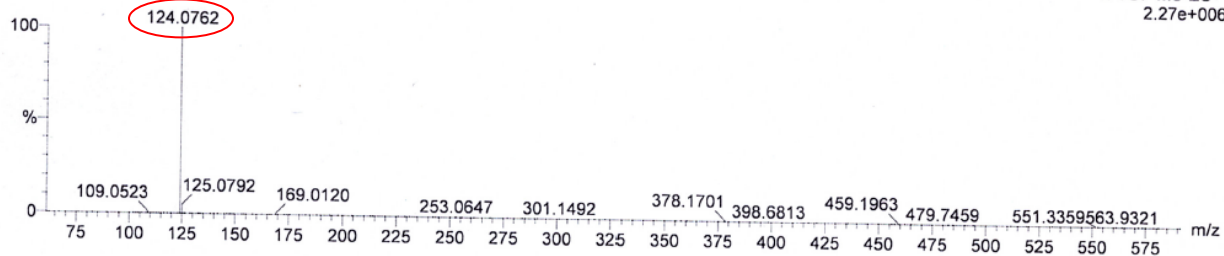

Minimum: -1.5  
Maximum: 2.0 5.0 50.0

| Mass     | Calc. Mass | mDa | PPM | DBE | i-FIT | Norm | Conf (%) | Formula    |
|----------|------------|-----|-----|-----|-------|------|----------|------------|
| 124.0762 | 124.0762   | 0.0 | 0.0 | 3.5 | 55.0  | n/a  | n/a      | C7 H10 N O |



### <sup>1</sup>H-NMR of undecan-1-amine (7e)

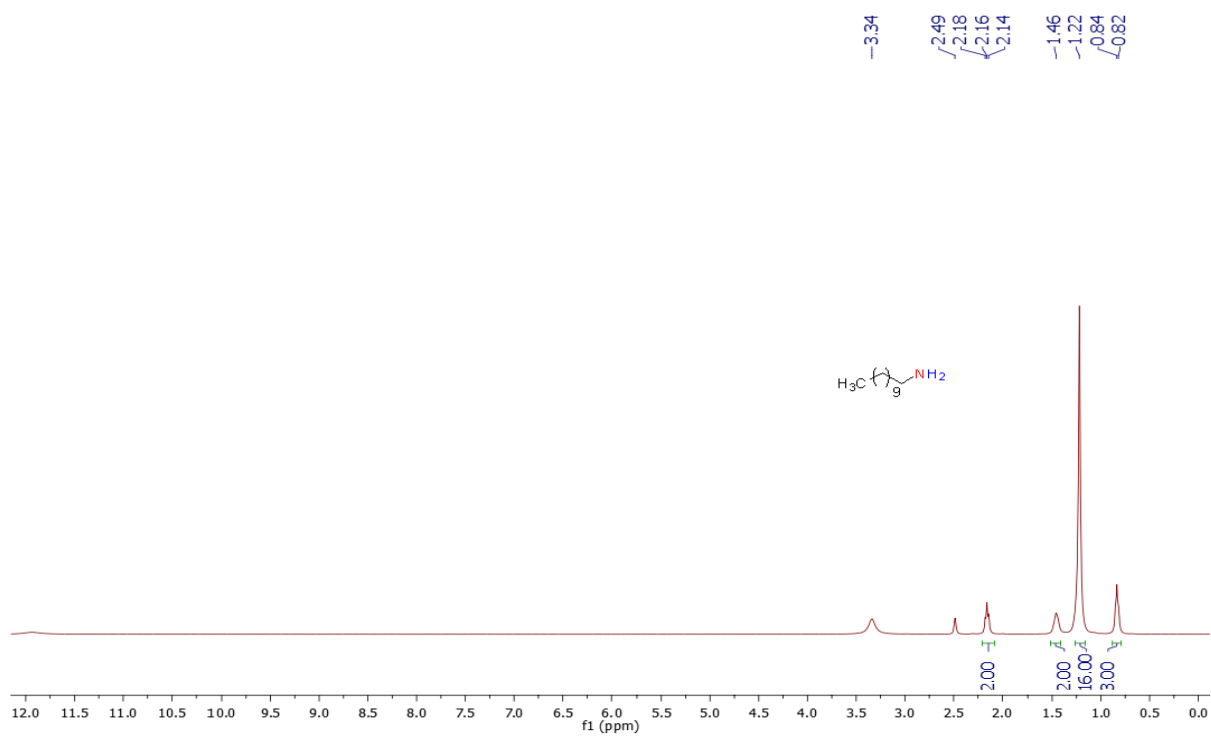

### <sup>13</sup>C-NMR of undecan-1-amine (7e)

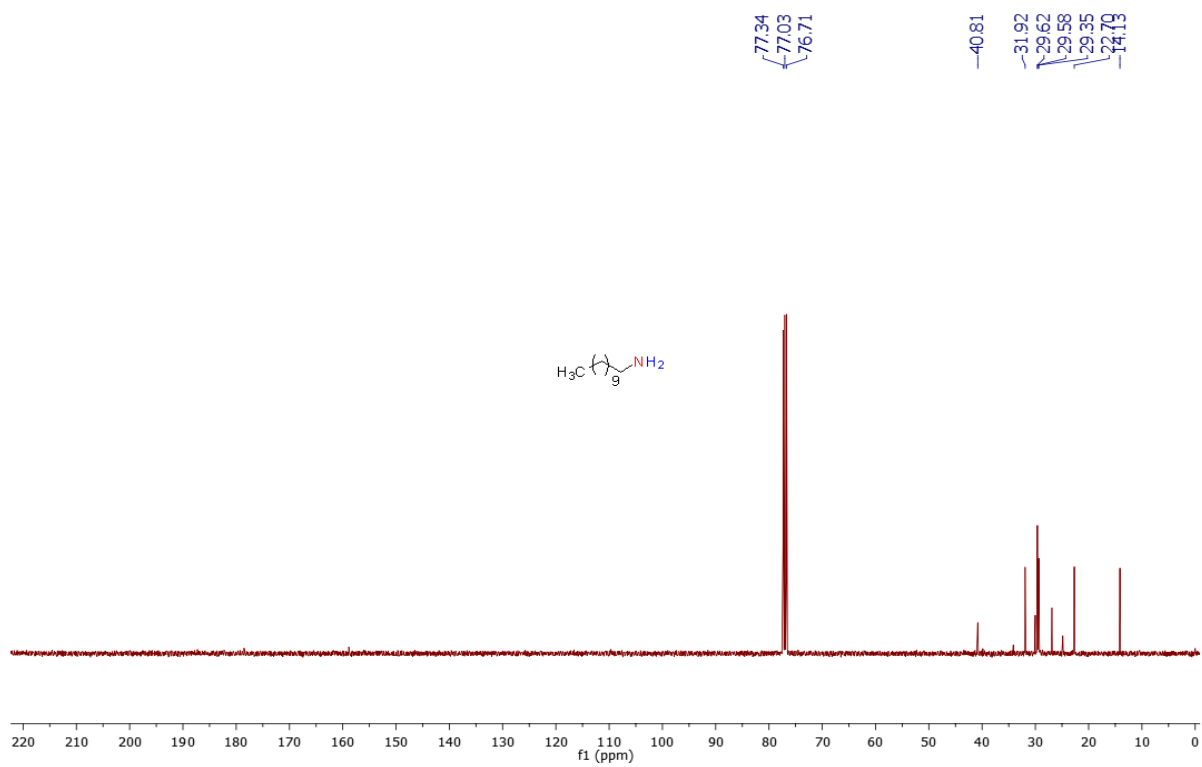

DEPT of undecan-1-amine (7e)

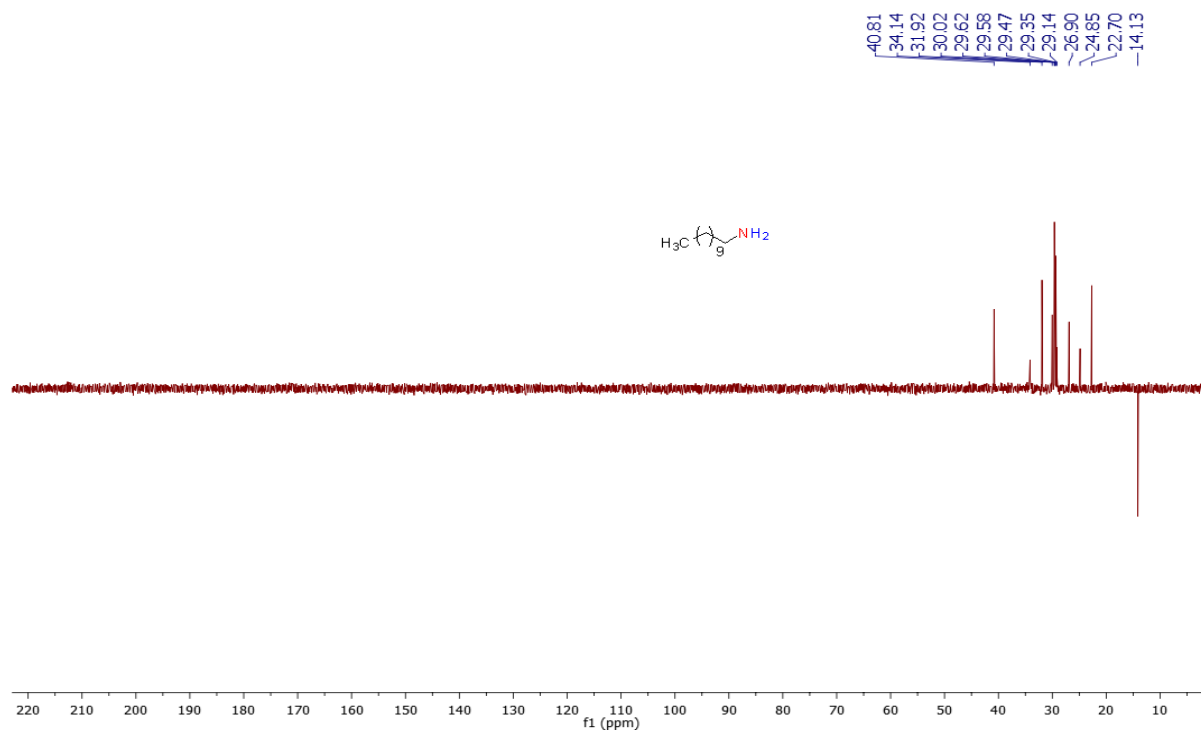

<sup>1</sup>H-NMR of 8-oxo-9-(3,4,5-trimethoxyphenyl)-5,5a,6,8,8a,9-hexahydrofuro[3',4':6,7]naphtho[2,3-d][1,3]dioxol-5-yl (4-cyanophenyl)carbamate (8a)

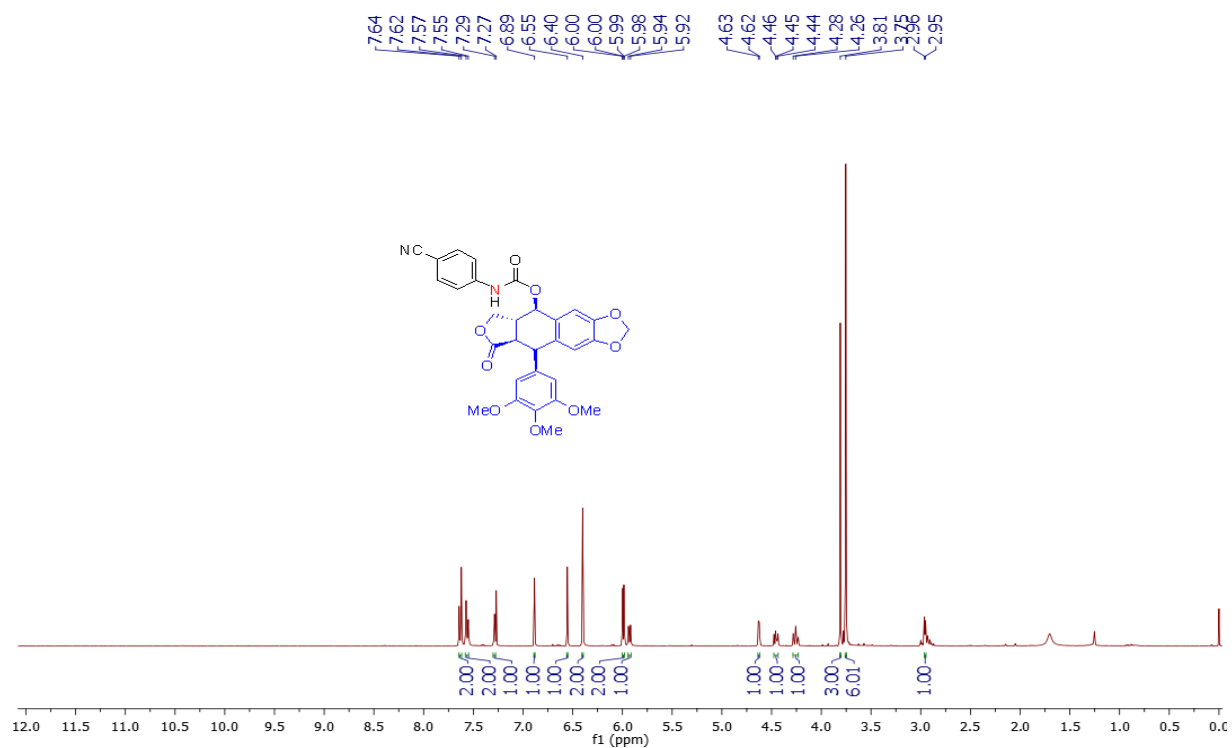

**<sup>13</sup>C-NMR** of **8-oxo-9-(3,4,5-trimethoxyphenyl)-5,5a,6,8,8a,9-hexahydrofuro[3',4':6,7]naphtho[2,3-d][1,3]dioxol-5-yl (4-cyanophenyl)carbamate (8a)**

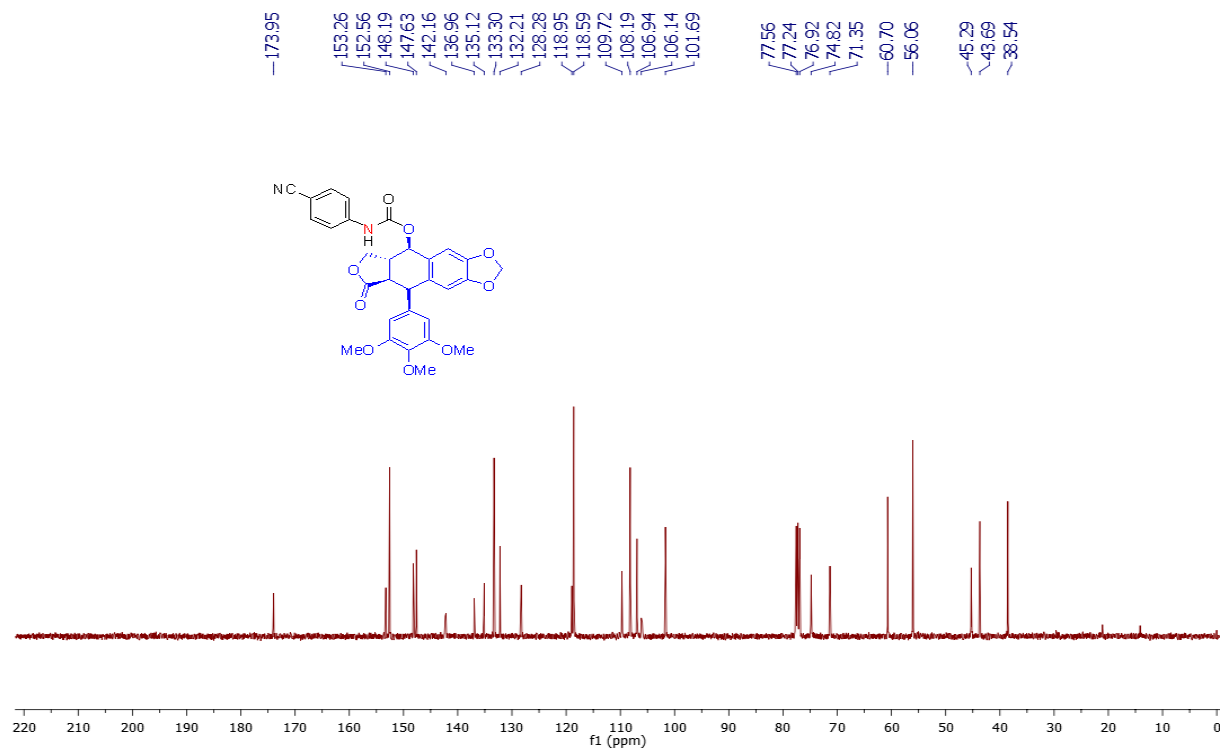

**DEPT** of **8-oxo-9-(3,4,5-trimethoxyphenyl)-5,5a,6,8,8a,9-hexahydrofuro[3',4':6,7]naphtho[2,3-d][1,3]dioxol-5-yl (4-cyanophenyl)carbamate (8a)**

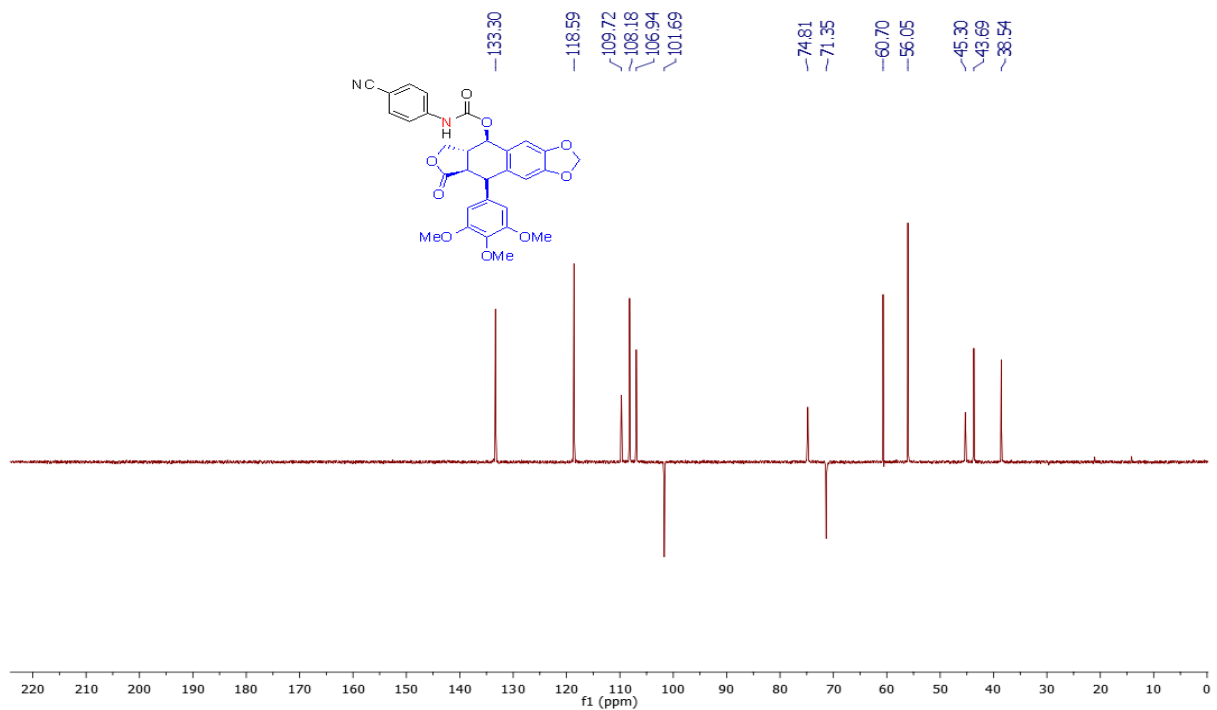

**HRMS of 8-oxo-9-(3,4,5-trimethoxyphenyl)-5,5a,6,8,8a,9-hexahydrofuro[3',4':6,7]naphtho[2,3-d][1,3]dioxol-5-yl (4-cyanophenyl)carbamate (8a)**

**Elemental Composition Report**

Page 1

**Single Mass Analysis**

Tolerance = 3.0 PPM / DBE: min = -1.5, max = 50.0

Element prediction: Off

Number of isotope peaks used for i-FIT = 3

Monoisotopic Mass, Even Electron Ions

71 formula(e) evaluated with 1 results within limits (up to 3 closest results for each mass)

Elements Used:

C: 0-30 H: 0-200 N: 0-2 O: 0-9 Na: 0-1

F-194

200921\_10 17 (0.363) Cm (17)

QMI DIVISION, CSIR-IIIM JAMMU  
Xevo G2-XS QTOF YFC2015

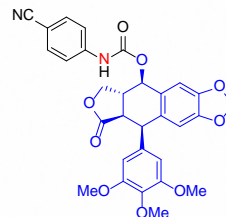

20-Sep-2021  
12:22:16  
1: TOF MS ES+  
2.89e+006

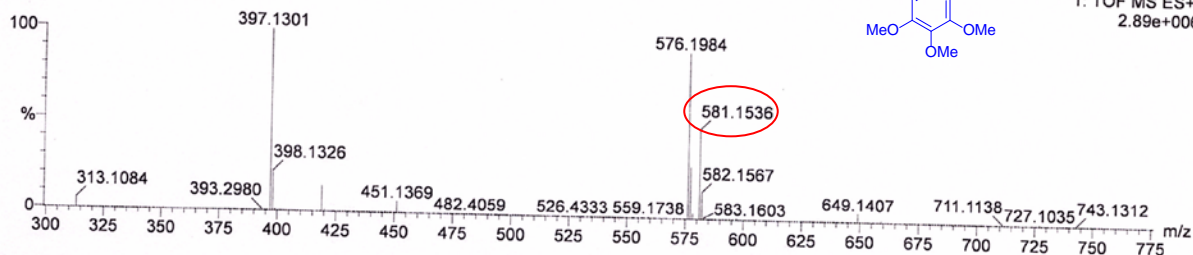

Minimum:

Maximum: 2.0 3.0 -1.5

| Mass     | Calc. Mass | mDa | PPM | DBE  | i-FIT | Norm | Conf(%) | Formula          |
|----------|------------|-----|-----|------|-------|------|---------|------------------|
| 581.1536 | 581.1536   | 0.0 | 0.0 | 18.5 | 34.1  | n/a  | n/a     | C30 H26 N2 O9 Na |

**<sup>1</sup>H-NMR of 4-allyl-2-methoxyphenyl (4-cyanophenyl)carbamate (8b)**

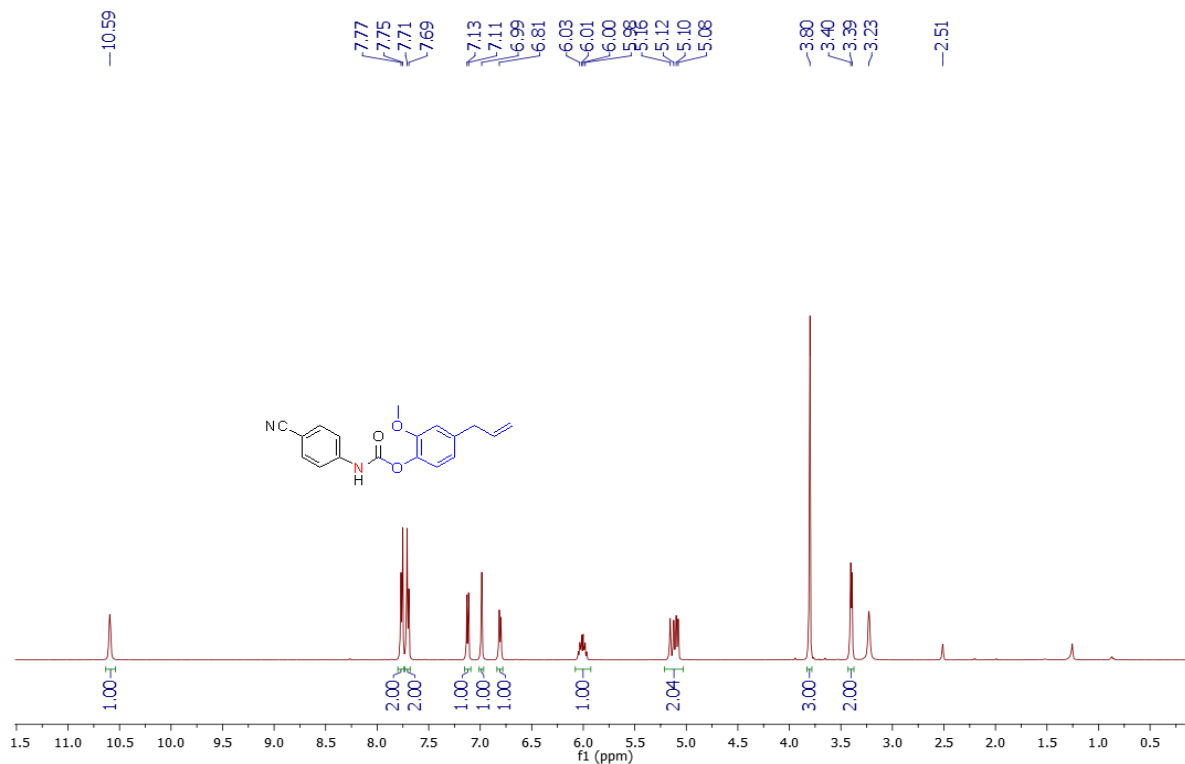

### <sup>13</sup>C-NMR of 4-allyl-2-methoxyphenyl (4-cyanophenyl)carbamate (8b)

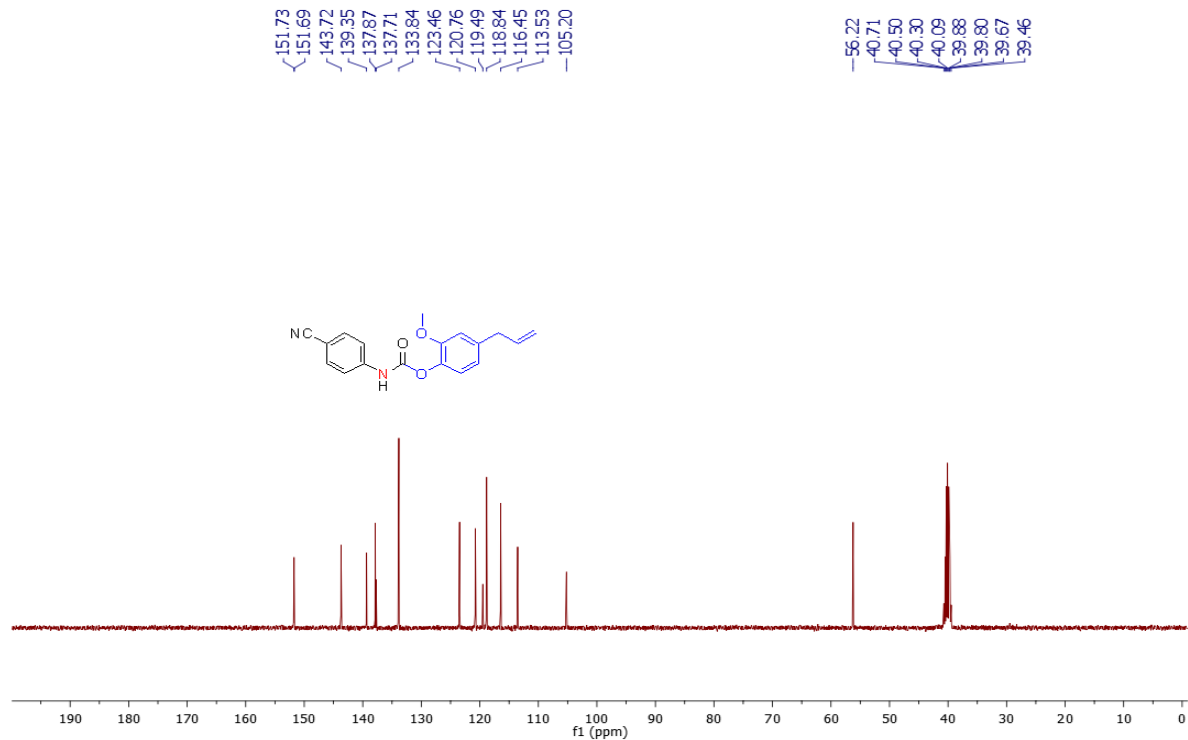

### DEPT of 4-allyl-2-methoxyphenyl (4-cyanophenyl)carbamate (8b)

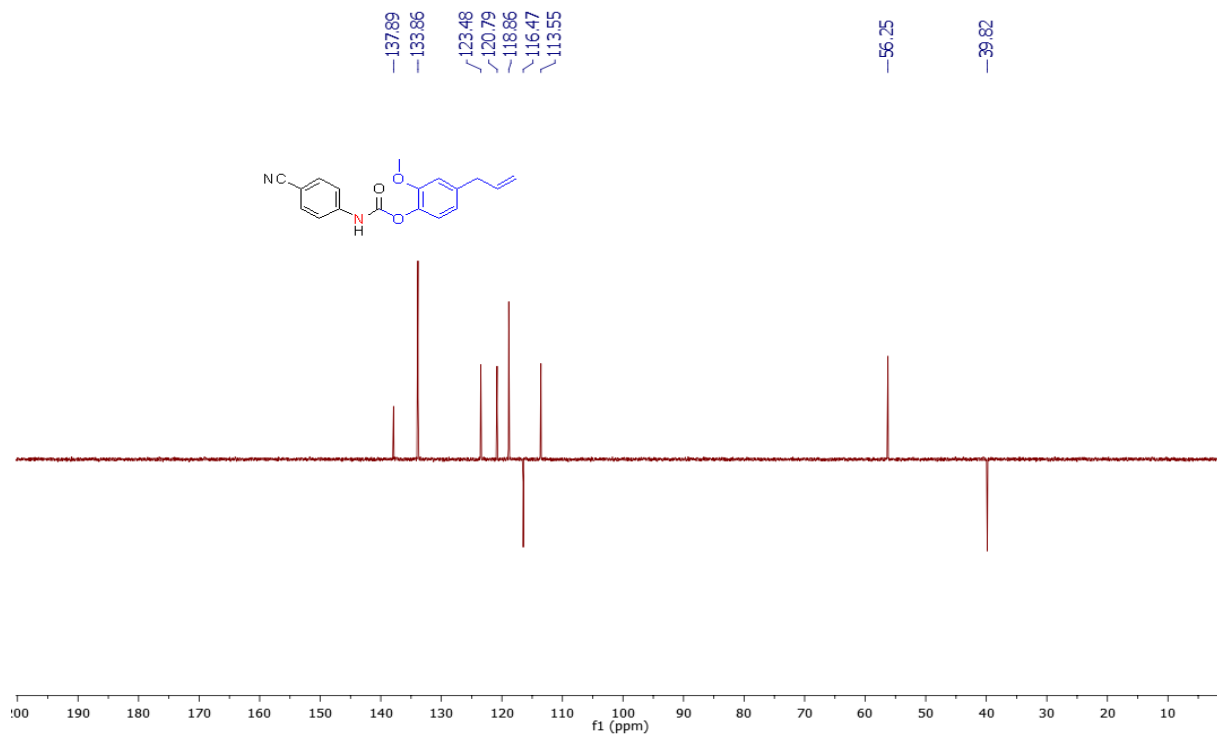

# HRMS of 4-allyl-2-methoxyphenyl (4-cyanophenyl)carbamate (8b)

## Elemental Composition Report

Page 1

### Single Mass Analysis

Tolerance = 5.0 PPM / DBE: min = -1.5, max = 50.0  
 Element prediction: Off  
 Number of isotope peaks used for i-FIT = 3

Monoisotopic Mass, Even Electron Ions  
 16 formula(e) evaluated with 1 results within limits (up to 3 closest results for each mass)  
 Elements Used:  
 C: 0-18 H: 0-200 N: 0-2 O: 0-3  
 F-192

QMI DIVISION, CSIR-IIIM JAMMU  
 Xevo G2-XS QTOF YFC2015

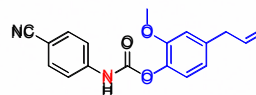

21-Sep-2021  
 13:07:52  
 1: TOF MS ES+  
 1.18e+006

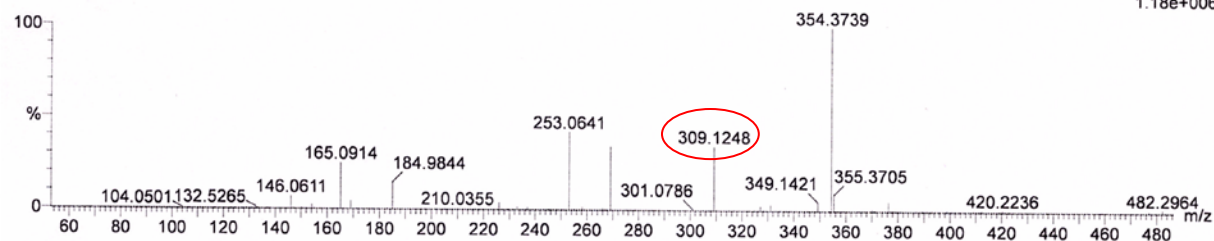

Minimum: -1.5  
 Maximum: 2.0 5.0 50.0

| Mass     | Calc. Mass | mDa | PPM | DBE  | i-FIT | Norm | Conf(%) | Formula       |
|----------|------------|-----|-----|------|-------|------|---------|---------------|
| 309.1248 | 309.1239   | 0.9 | 2.9 | 11.5 | 44.1  | n/a  | n/a     | C18 H17 N2 O3 |

# <sup>1</sup>H-NMR of 5',6a,9-trimethyl-1,3,3',4,4',5,5',6,6a,6b,6',7,8,8a,8b,9,11a,12,12a,12b-icosahydrospiro[naphtho[2',1':4,5]indeno[2,1-b]furan-10,2'-pyran]-4-yl (4-methoxyphenyl)carbamate (8c)

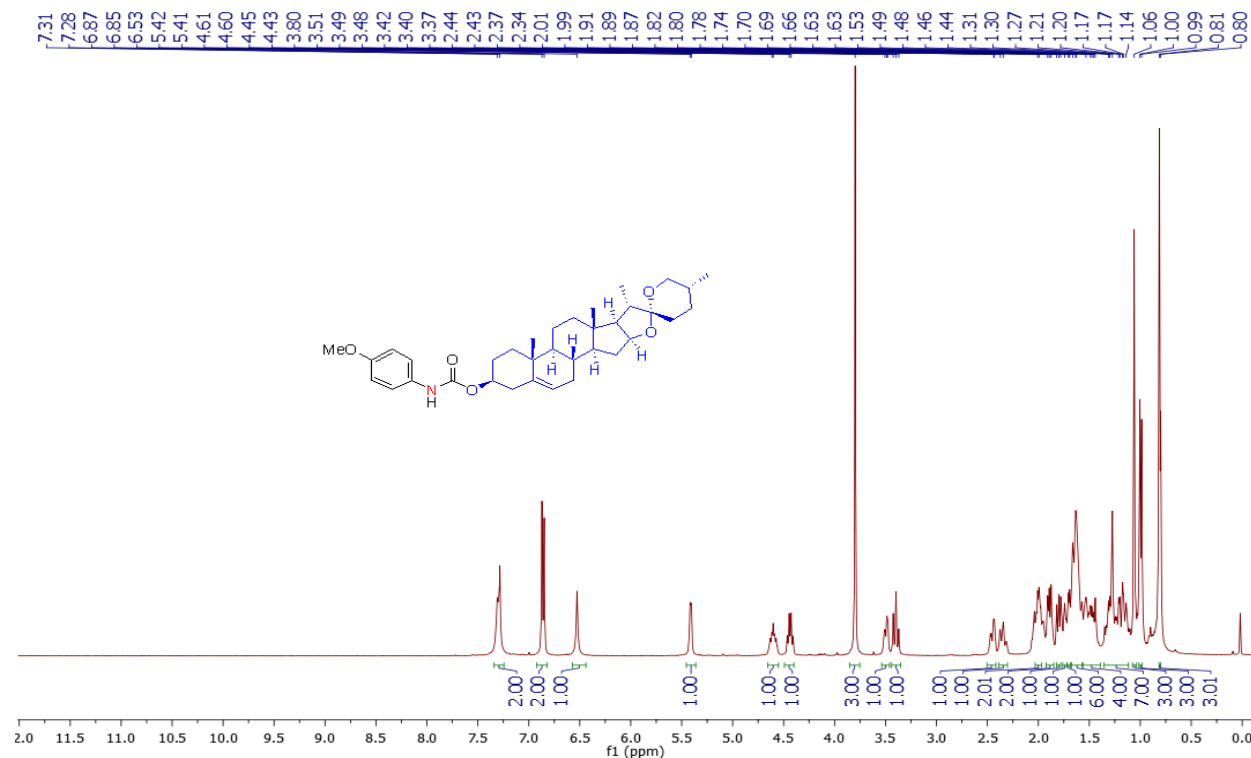

**<sup>13</sup>C-NMR of 5',6a,9-trimethyl-1,3,3',4,4',5,5',6,6a,6b,6',7,8,8a,8b,9,11a,12,12a,12b-icosahydrospiro[naphtho[2',1':4,5]indeno[2,1-b]furan-10,2'-pyran]-4-yl (4-methoxyphenyl)carbamate (8c)**

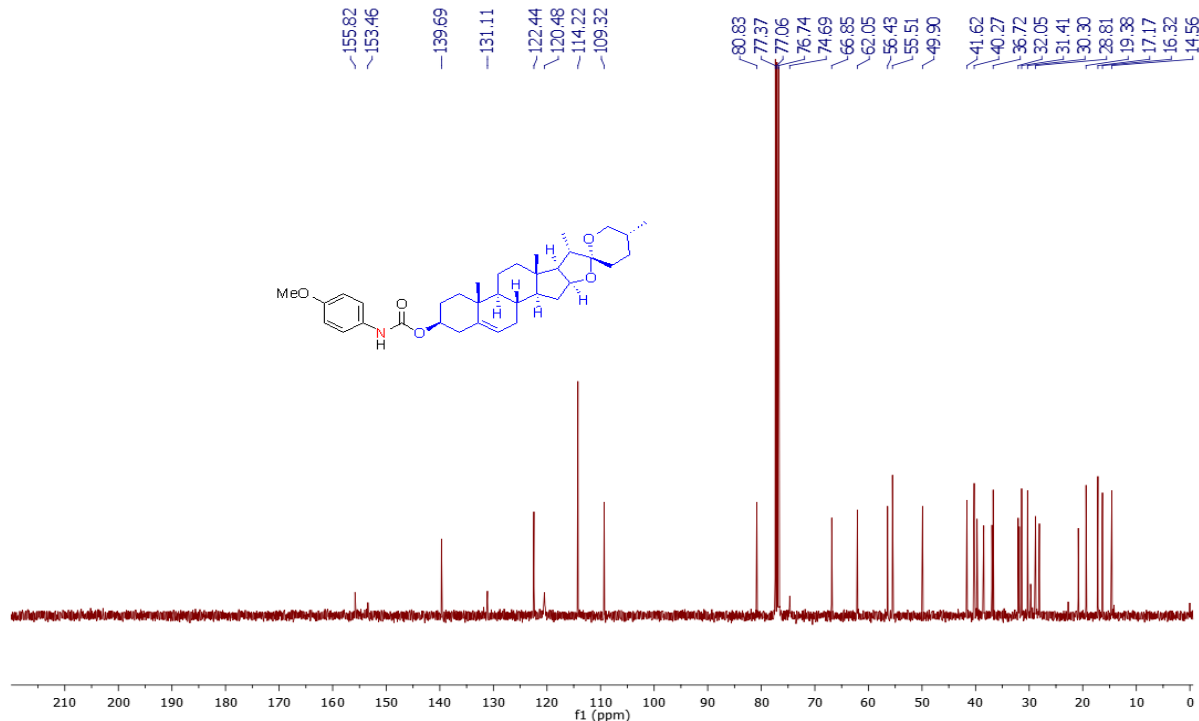

**DEPT of 5',6a,9-trimethyl-1,3,3',4,4',5,5',6,6a,6b,6',7,8,8a,8b,9,11a,12,12a,12b-icosahydrospiro[naphtho[2',1':4,5]indeno[2,1-b]furan-10,2'-pyran]-4-yl (4-methoxyphenyl)carbamate (8c)**

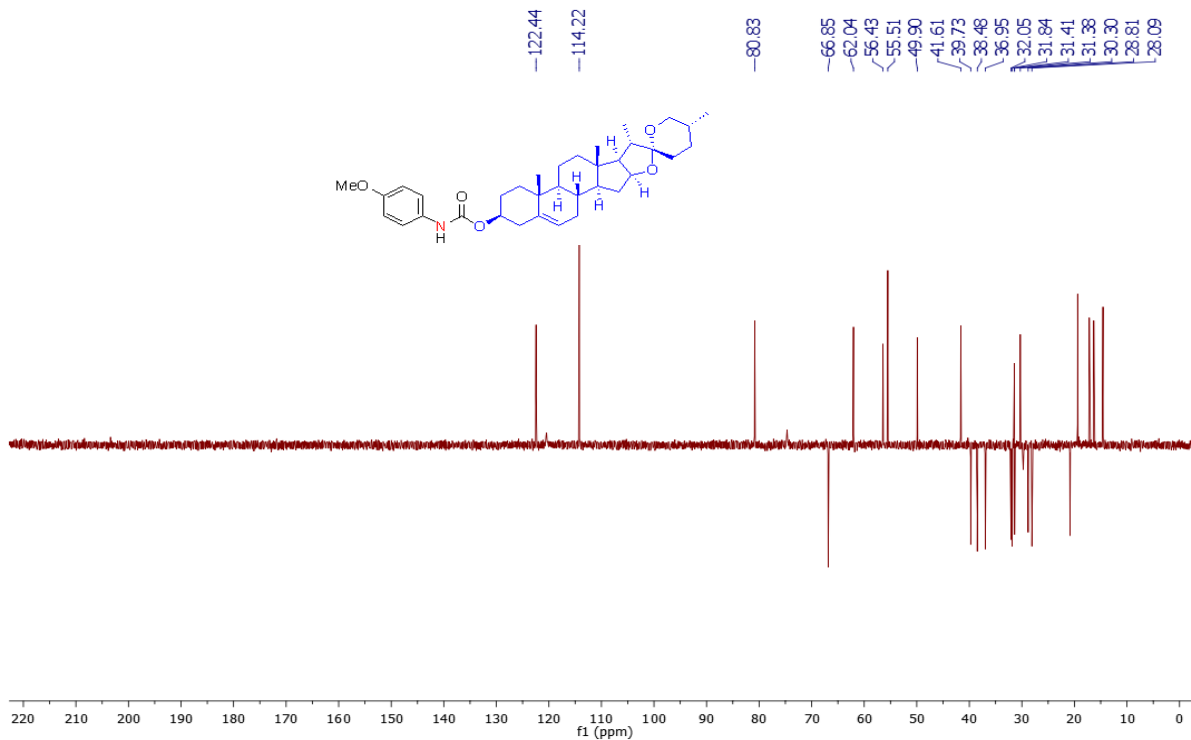

**HRMS of 5',6a,9-trimethyl-1,3,3',4,4',5,5',6,6a,6b,6',7,8,8a,8b,9,11a,12,12a,12b-icosahydrospiro[naphtho[2',1':4,5]indeno[2,1-b]furan-10,2'-pyran]-4-yl (4-methoxyphenyl)carbamate (8c)**

**Elemental Composition Report**

Page 1

**Single Mass Analysis**

Tolerance = 5.0 PPM / DBE: min = -1.5, max = 50.0

Element prediction: Off

Number of isotope peaks used for i-FIT = 3

Monoisotopic Mass, Even Electron Ions

16 formula(e) evaluated with 1 results within limits (up to 3 closest results for each mass)

Elements Used:

C: 0-35 H: 0-200 N: 0-1 O: 0-5

F-185 B

QMI DIVISION, CSIR-IIIM JAMMU  
Xevo G2-XS QTOF YFC2015

29-Dec-2021

13:16:47

1: TOF MS ES+

1.90e+006

291221\_31 7 (0.155) Cm (7:8)

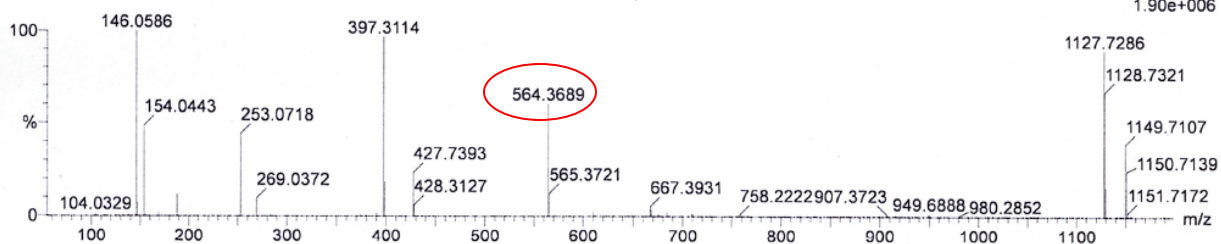

Minimum: -1.5

Maximum: 2.0 5.0 50.0

| Mass     | Calc. Mass | mDa | PPM | DBE  | i-FIT | Norm | Conf(%) | Formula      |
|----------|------------|-----|-----|------|-------|------|---------|--------------|
| 564.3689 | 564.3689   | 0.0 | 0.0 | 11.5 | 37.3  | n/a  | n/a     | C35 H50 N O5 |

**<sup>1</sup>H-NMR of (E)-1-(4-cyanophenyl)-3-(2-(((5-methoxy-1-(4-(trifluoromethyl)phenyl)pentylidene)amino)oxy)ethyl)urea (8d)**

9.01, 7.87, 7.85, 7.73, 7.71, 7.63, 7.62, 7.62, 7.60, 7.60, 7.58, 6.39, 6.38, 6.37, 4.26, 3.50, 3.27, 3.17, 2.81, 2.51, 1.52

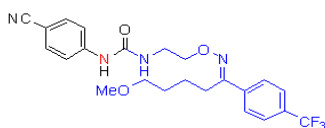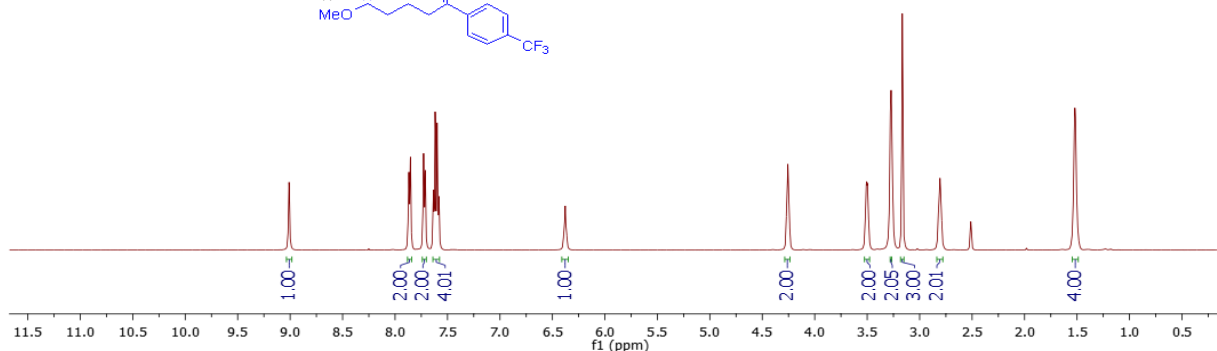



**<sup>19</sup>F-NMR of (E)-1-(4-cyanophenyl)-3-(2-(((5-methoxy-1-(4-(trifluoromethyl)phenyl)pentylidene)amino)oxy)ethyl)urea (8d)**

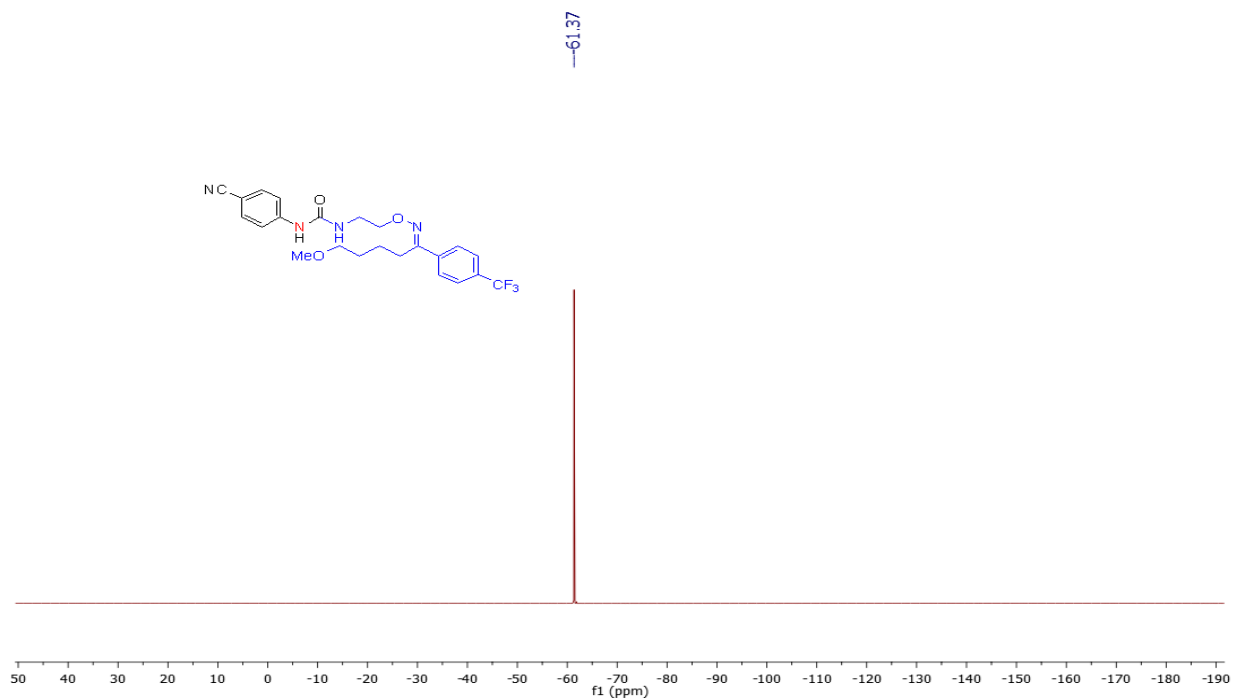

**<sup>13</sup>C-NMR of (E)-1-(4-cyanophenyl)-3-(2-(((5-methoxy-1-(4-(trifluoromethyl)phenyl)pentylidene)amino)oxy)ethyl)urea (8d)**

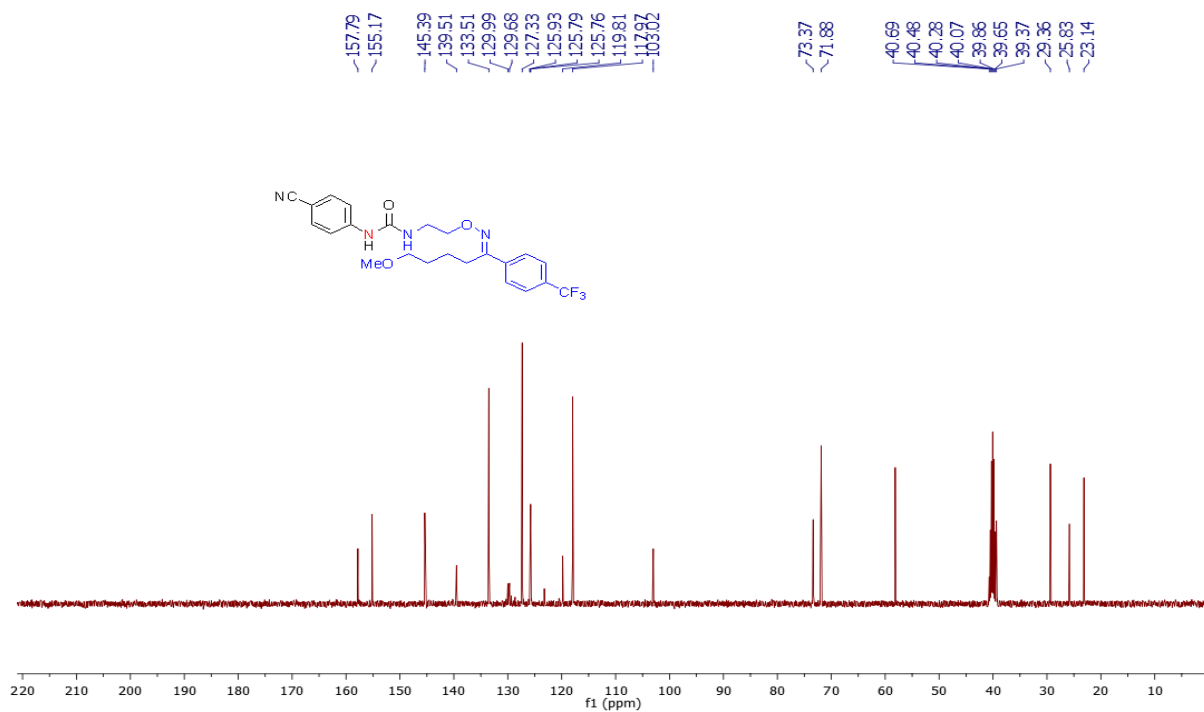

**DEPT** of **(E)-1-(4-cyanophenyl)-3-(2-(((5-methoxy-1-(4-(trifluoromethyl)phenyl)pentylidene)amino)oxy)ethyl)urea (8d)**

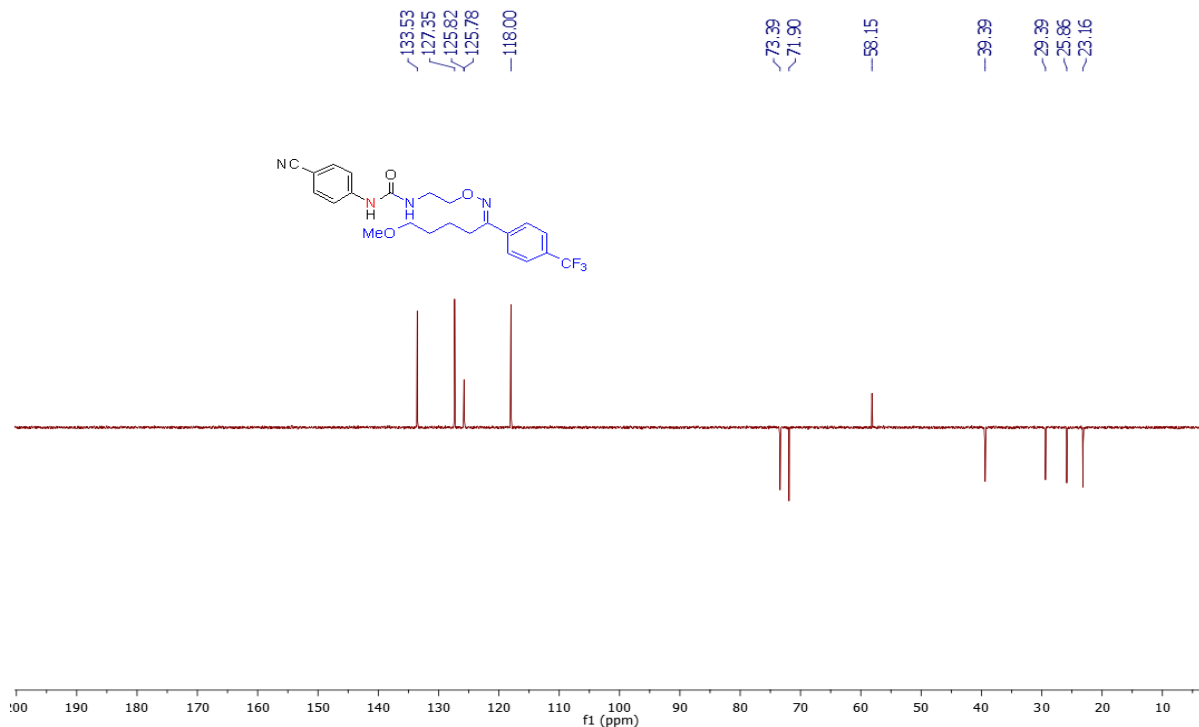

**HRMS** of **(E)-1-(4-cyanophenyl)-3-(2-(((5-methoxy-1-(4-(trifluoromethyl)phenyl)pentylidene)amino)oxy)ethyl)urea (8d)**

**Elemental Composition Report**

Page 1

**Single Mass Analysis**

Tolerance = 5.0 PPM / DBE: min = -1.5, max = 50.0

Element prediction: Off

Number of isotope peaks used for i-FIT = 3

Monoisotopic Mass, Even Electron Ions

85 formula(e) evaluated with 1 results within limits (up to 3 closest results for each mass)

Elements Used:

C: 0-23 H: 0-200 N: 0-4 O: 0-3 F: 0-3

F-185 B

QMI DIVISION, CSIR-IIIM JAMMU  
Xevo G2-XS QTOF YFC2015

21-Sep-2021

13:13:27

1: TOF MS ES+

1.39e+006

210921\_26 26 (0.535) Cm (26:27)

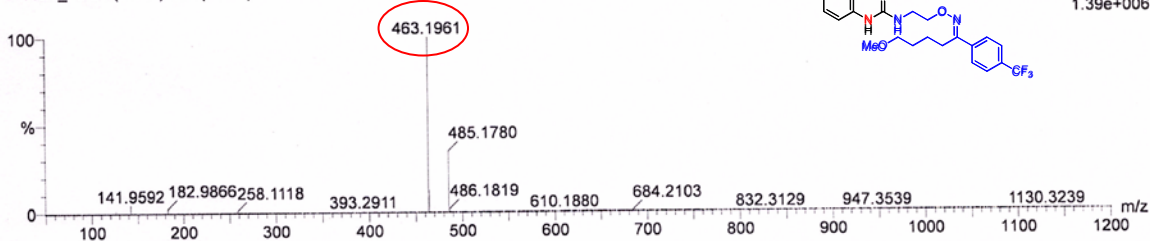

Minimum: -1.5  
Maximum: 2.0 5.0 50.0

| Mass     | Calc. Mass | mDa | PPM | DBE  | i-FIT | Norm | Conf (%) | Formula                                                                      |
|----------|------------|-----|-----|------|-------|------|----------|------------------------------------------------------------------------------|
| 463.1961 | 463.1957   | 0.4 | 0.9 | 11.5 | 40.9  | n/a  | n/a      | C <sub>23</sub> H <sub>26</sub> N <sub>4</sub> O <sub>3</sub> F <sub>3</sub> |

### <sup>1</sup>H-NMR of (*E*)-3,7-dimethylocta-2,6-dien-1-yl phenylcarbamate (8e)

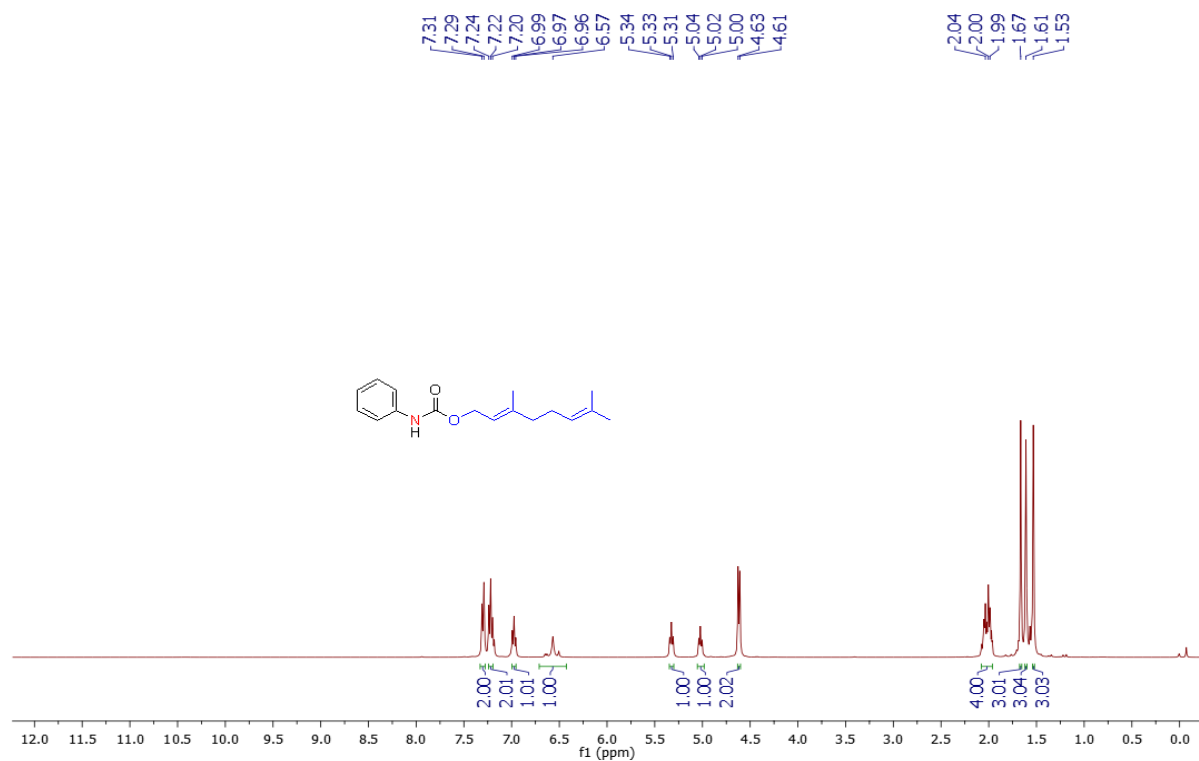

### <sup>13</sup>C-NMR of (*E*)-3,7-dimethylocta-2,6-dien-1-yl phenylcarbamate (8e)

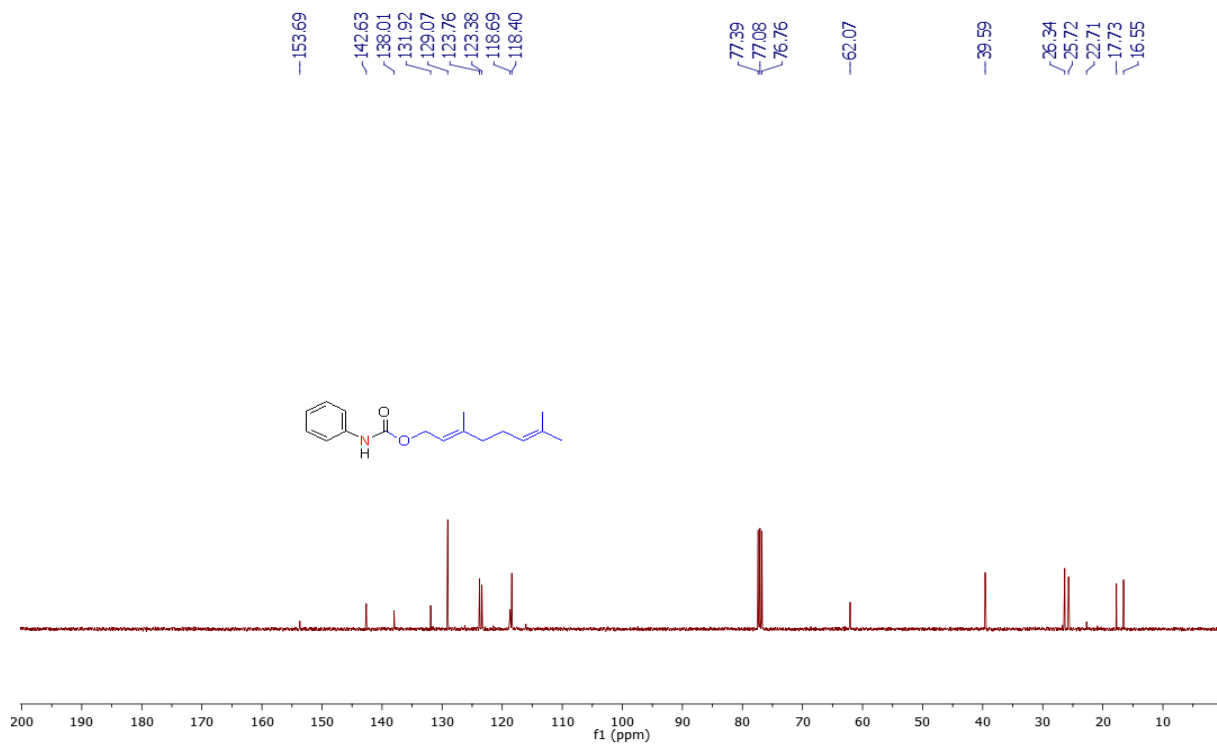

## DEPT of (*E*)-3,7-dimethylocta-2,6-dien-1-yl phenylcarbamate (**8e**)

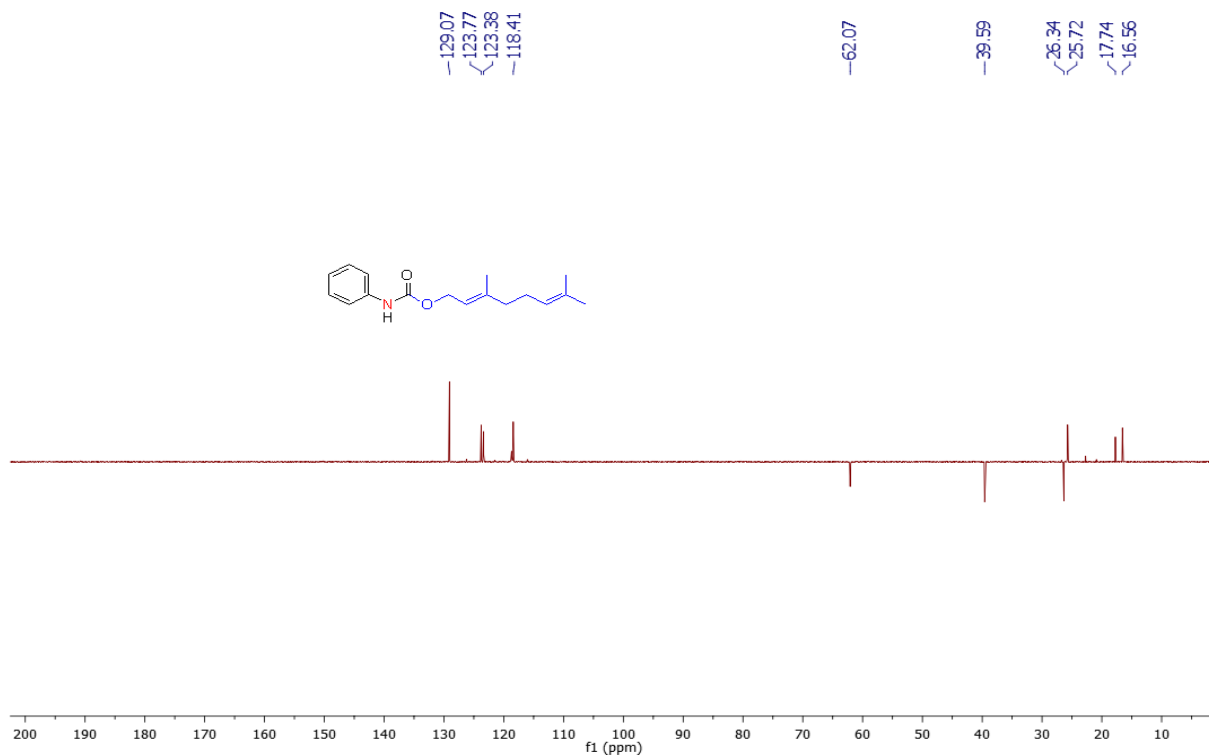

## HRMS of (*E*)-3,7-dimethylocta-2,6-dien-1-yl phenylcarbamate (**8e**)

### Elemental Composition Report

Page 1

### Single Mass Analysis

Tolerance = 3.0 PPM / DBE: min = -1.5, max = 50.0

Element prediction: Off

Number of isotope peaks used for i-FIT = 3

Monoisotopic Mass, Even Electron Ions

13 formula(e) evaluated with 1 results within limits (up to 3 closest results for each mass)

Elements Used:

C: 0-17 H: 0-200 N: 0-1 O: 0-2 Na: 0-1

F-218

200921\_05 19 (0.397) Cm (19)

QMI DIVISION, CSIR-IIIM JAMMU  
Xevo G2-XS QTOF YFC2015

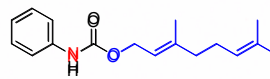

20-Sep-2021  
12:08:45  
1: TOF MS ES+  
1.32e+005

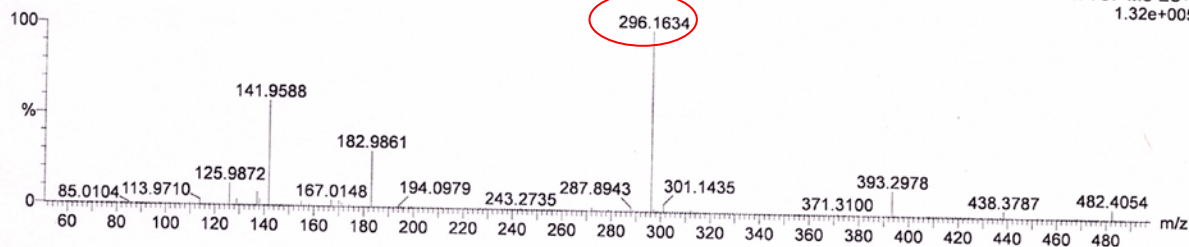

Minimum:

Maximum: 2.0 3.0 -1.5 50.0

| Mass     | Calc. Mass | mDa | PPM | DBE | i-FIT | Norm | Conf(%) | Formula         |
|----------|------------|-----|-----|-----|-------|------|---------|-----------------|
| 296.1634 | 296.1626   | 0.8 | 2.7 | 6.5 | 45.6  | n/a  | n/a     | C17 H23 N O2 Na |

## Controlled experiment (Scheme 7).

**Exp. 1:** A solution of benzoic acid **1a** (100 mg, 0.819 mmol) and trichlorotriazine (TCT) (0.33 equiv.) in CH<sub>3</sub>CN (20 ml) was mixed with *N*-methylmorpholine (NMM) (1.4 equiv.) at room temperature and

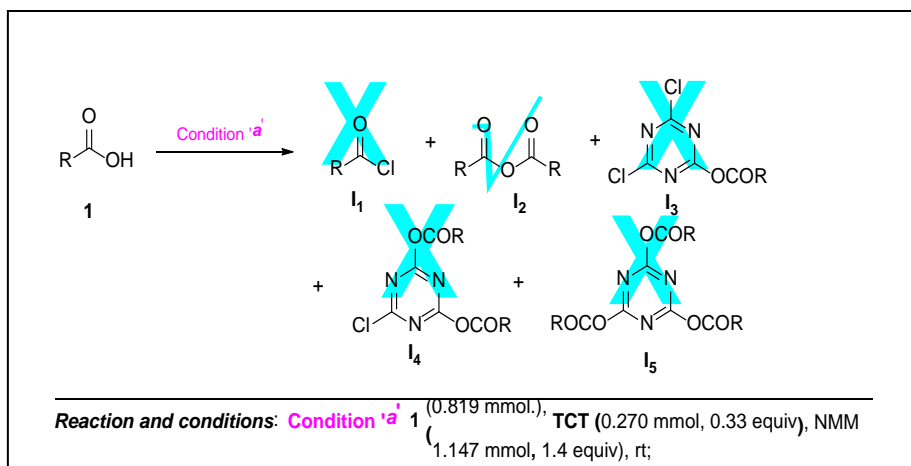

stirred for 30 minutes and monitored on TLC for the consumption of TCT. Reaction mixture was subjected to rota vapour to evaporate CH<sub>3</sub>CN and then extraction with ethyl acetate. The organic layer was washed with water and dried over anhydrous Na<sub>2</sub>SO<sub>4</sub>. The organic layer was evaporated under pressure to obtain the crude product which was then purified by flash column chromatography using ethyl acetate and hexane to purify the intermediate. The intermediate was monitored subjected to GC-MS study, where the peak having at *t<sub>R</sub>* of 9.790 min, correspond to benzoic anhydride <sup>26</sup>(**I<sub>2</sub>**). The intermediate was also analysed by <sup>1</sup>H NMR, <sup>13</sup>C NMR and HMRS

### Spectral data of benzoic anhydride (**I<sub>2</sub>**):

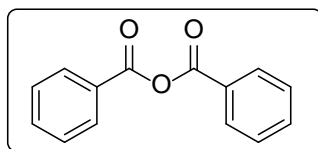

(100 mg, 0.819 mmol of benzoic acid); TLC (Hexane/EtOAc, 7:3) *R<sub>f</sub>* = 0.4; viscous, colourless : <sup>1</sup>H NMR (400 MHz, CDCl<sub>3</sub>) δ 8.15 (d, *J* = 7.2 Hz, 2H), 7.66 (t, *J* = 7.4 Hz, 1H), 7.52 (t, *J* = 7.8 Hz, 2H). <sup>13</sup>C NMR (101 MHz, CDCl<sub>3</sub>) δ <sup>13</sup>C NMR (101 MHz, CDCl<sub>3</sub>) δ 162.4, 134.6, 130.5, 128.9, 128.8; HRMS (ESI+TOF) calcd. for: C<sub>14</sub>H<sub>10</sub>O<sub>3</sub>Na 249.0528 [M+H]<sup>+</sup>, found 249.0535

### GCMS report of intermediate ( I<sub>2</sub>):

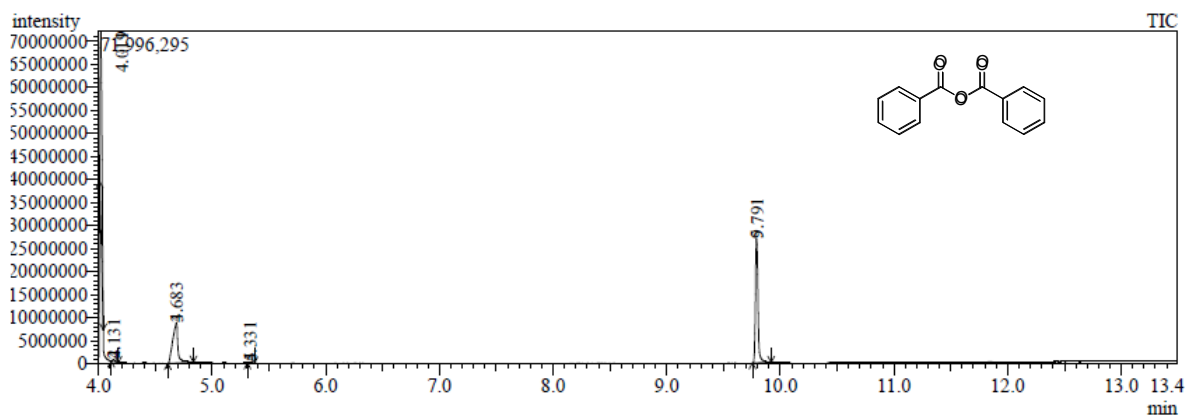

<< Target >>

Line#:5 R.Time:9.790(Scan#:1159) MassPeaks:286  
RawMode:Averaged 9.785-9.795(1158-1160) BasePeak:105.15(8251846)  
BG Mode:Calc. from Peak Group 1 - Event 1 Q3 Scan

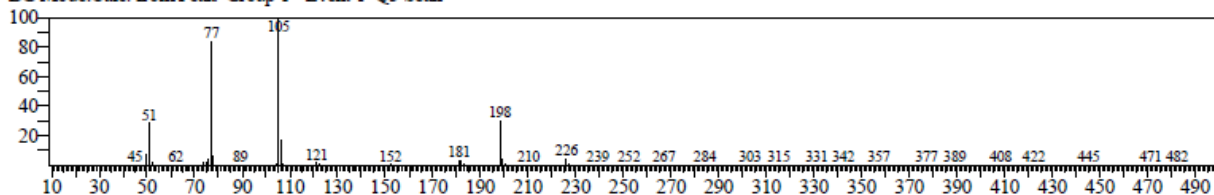

### <sup>1</sup>H-NMR of benzoic anhydride ( I<sub>2</sub>):

8.16  
8.14  
7.68  
7.66  
7.65  
7.54  
7.52  
7.50  
7.25

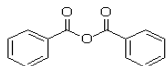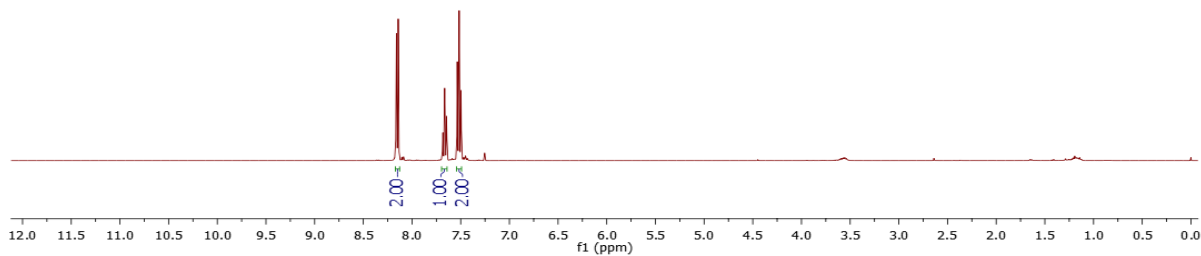

### <sup>13</sup>C-NMR of benzoic anhydride ( I<sub>2</sub>):

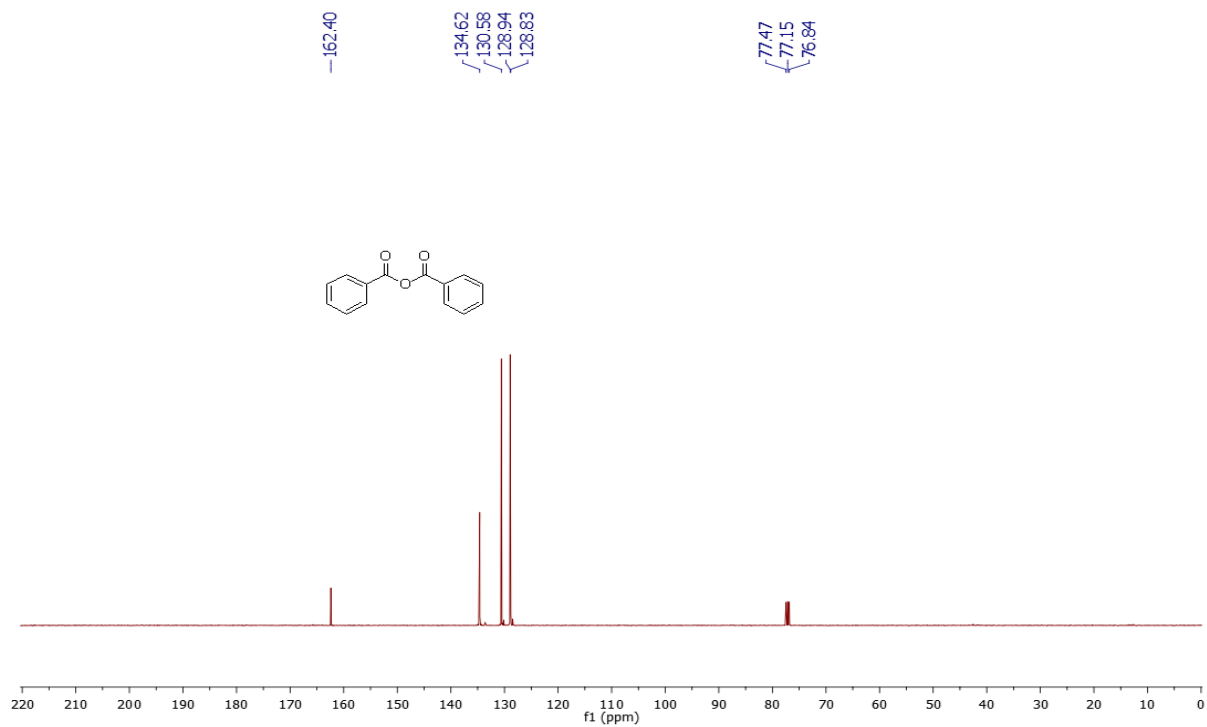

### DEPT of benzoic anhydride ( I<sub>2</sub>):

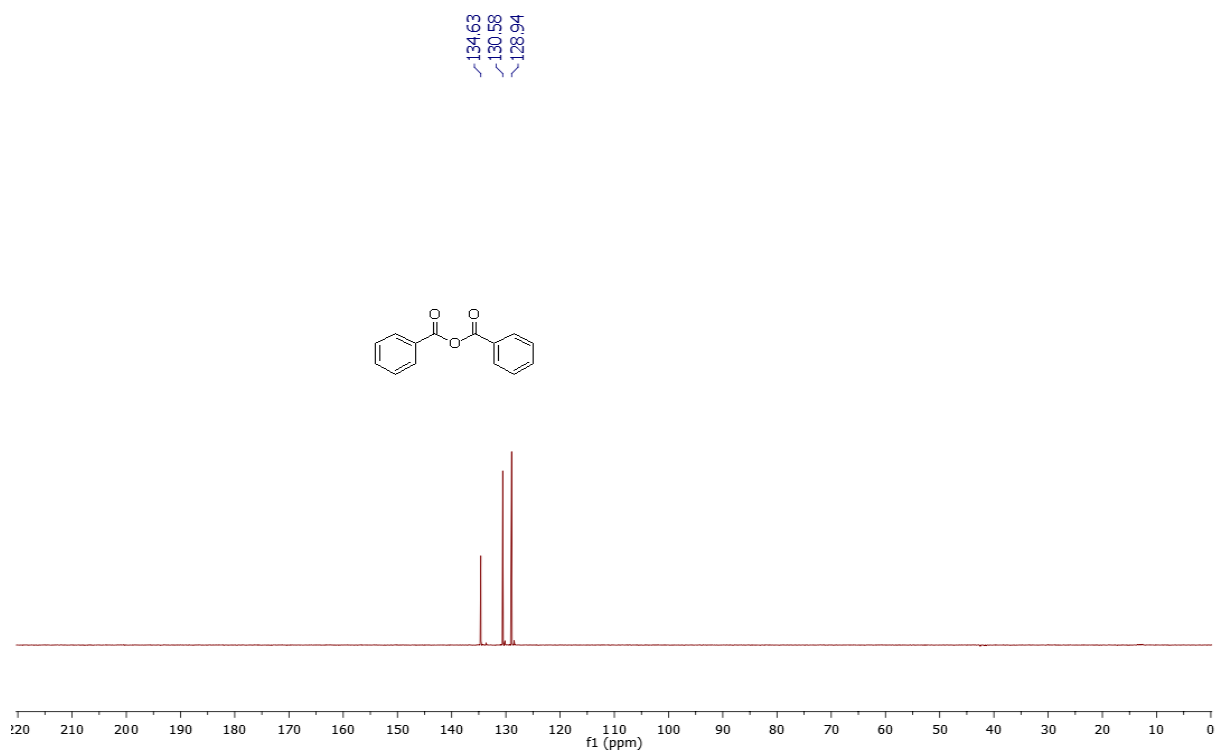

## HRMS REPORT of benzoic anhydride ( I<sub>2</sub>):

### Elemental Composition Report

Page 1

#### Single Mass Analysis

Tolerance = 10.0 PPM / DBE: min = -1.5, max = 50.0

Element prediction: Off

Number of isotope peaks used for i-FIT = 3

Monoisotopic Mass, Even Electron Ions

10 formula(e) evaluated with 1 results within limits (up to 3 closest results for each mass)

Elements Used:

C: 0-14 H: 0-200 O: 0-3 Na: 0-1

F-int

QMI DIVISION, CSIR-IIIM JAMMU  
Xevo G2-XS QTOF YFC2015

02-Dec-2021  
12:29:09  
1: TOF MS ES+  
2.69e+006

021222 25 (0.519) Cm (25:27)

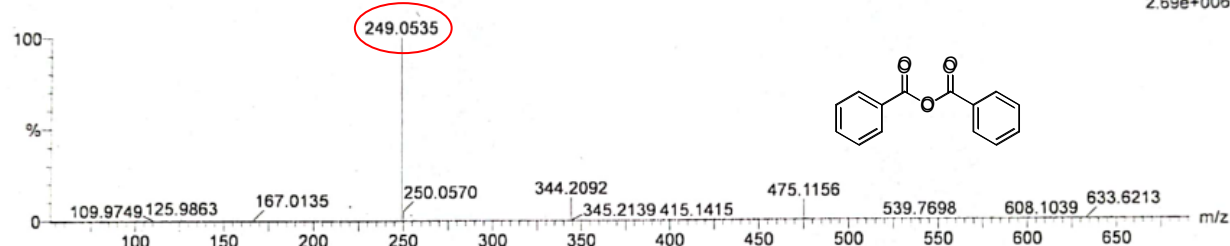

Minimum: -1.5  
Maximum: 2.0 10.0 50.0

| Mass     | Calc. Mass | mDa | PPM | DBE | i-FIT | Norm | Conf (%) | Formula       |
|----------|------------|-----|-----|-----|-------|------|----------|---------------|
| 249.0535 | 249.0528   | 0.7 | 2.8 | 9.5 | 43.9  | n/a  | n/a      | C14 H10 O3 Na |

**Exp 2:** In the next controlled experiment, to the isolated benzoic anhydride, NaN<sub>3</sub> (1.4 equiv.) and DMAP (10 mol%) were added and reaction mixture stirred for 4-5 hrs at room temperature and observed for the

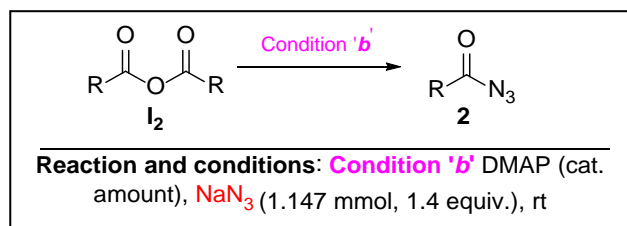

formation of acyl azide **2** and consumption of benzoic acid by TLC. Reaction mixture was subjected to rota vapour to evaporate CH<sub>3</sub>CN and then extraction with ethyl acetate. The organic layer was washed with water and dried over anhydrous Na<sub>2</sub>SO<sub>4</sub>. The organic layer was evaporated under pressure to obtain the crude product which was then purified by flash column chromatography using ethyl acetate and hexane to purify the intermediate. The intermediate was monitored subjected to GC-MS study, where the peak having at t<sub>R</sub> of 6.027 min the mass peak indicating the formation of benzoyl azide<sup>27</sup>. The intermediate was also analysed by <sup>1</sup>H NMR, <sup>13</sup>C NMR.



## GCMS report of intermediate (2):

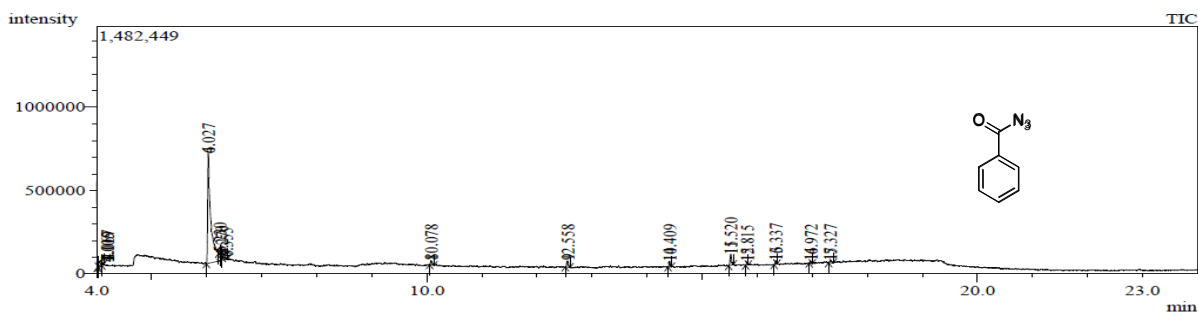

<< Target >>

Line# 4 RTime: 6.025 (Scan#: 406) MassPeaks: 267

RawMode: Averaged 6.020-6.030 (405-407) BasePeak: 119.05 (229756)

BG Mode: Calc. from Peak Group 1 - Event 1 Q3 Scan

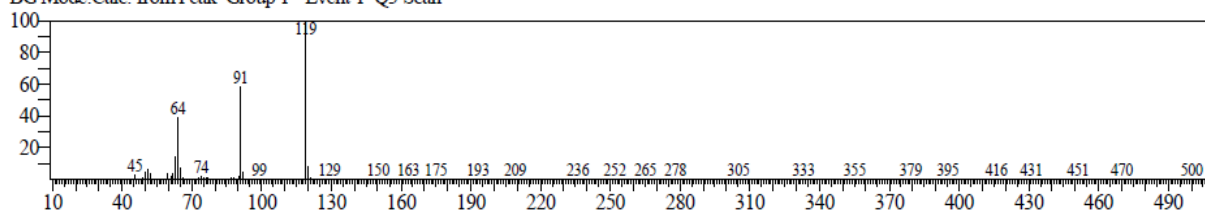

## Spectral data of benzoyl azide (2):

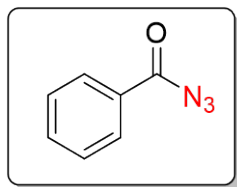

(100 mg of benzoic acid); TLC (Hexane/EtOAc, 9:1)  $R_f = 0.6$ ; colourless oil;  $^1\text{H NMR}$  (400 MHz,  $\text{DMSO-d}_6$ )  $\delta$  7.97-7.95 (m, 2H), 7.76 – 7.70 (m, 1H), 7.59 – 7.52 (m, 2H).  $^{13}\text{C NMR}$  (101 MHz,  $\text{DMSO}$ )  $\delta$  153.00, 140.17, 129.24, 122.27, 118.66.

## $^1\text{H-NMR}$ of benzoyl azide (2):

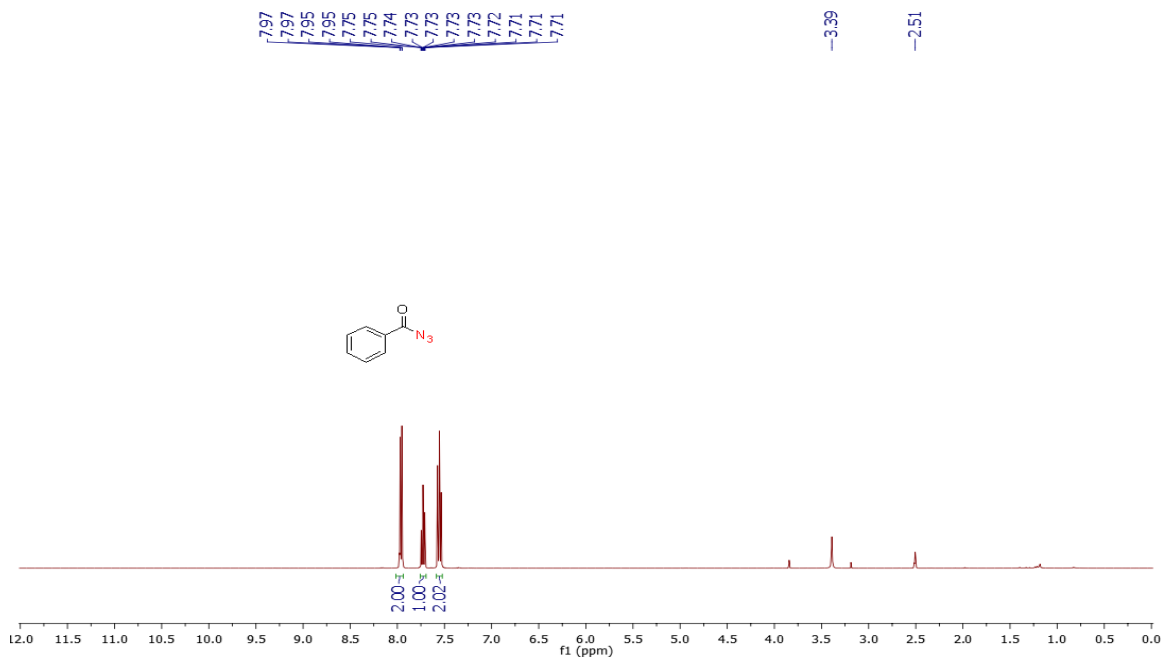

### <sup>13</sup>C-NMR of benzoyl azide (2):

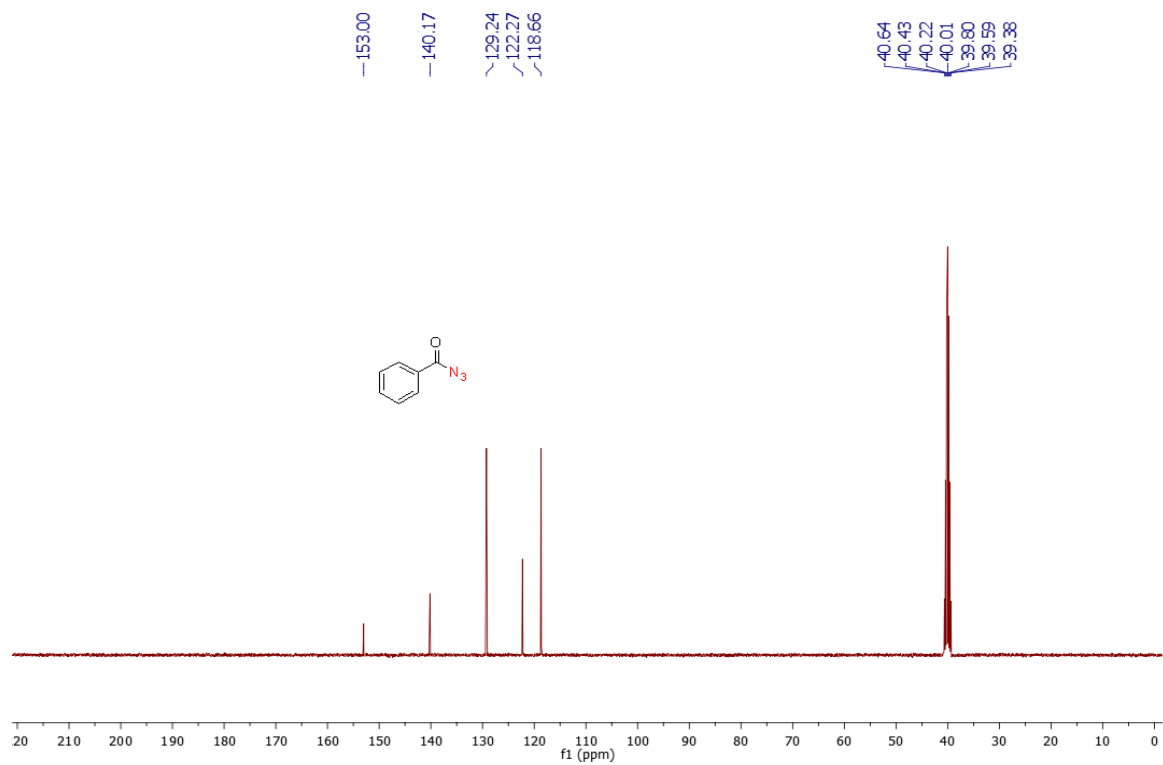

### DEPT of benzoyl azide (2):

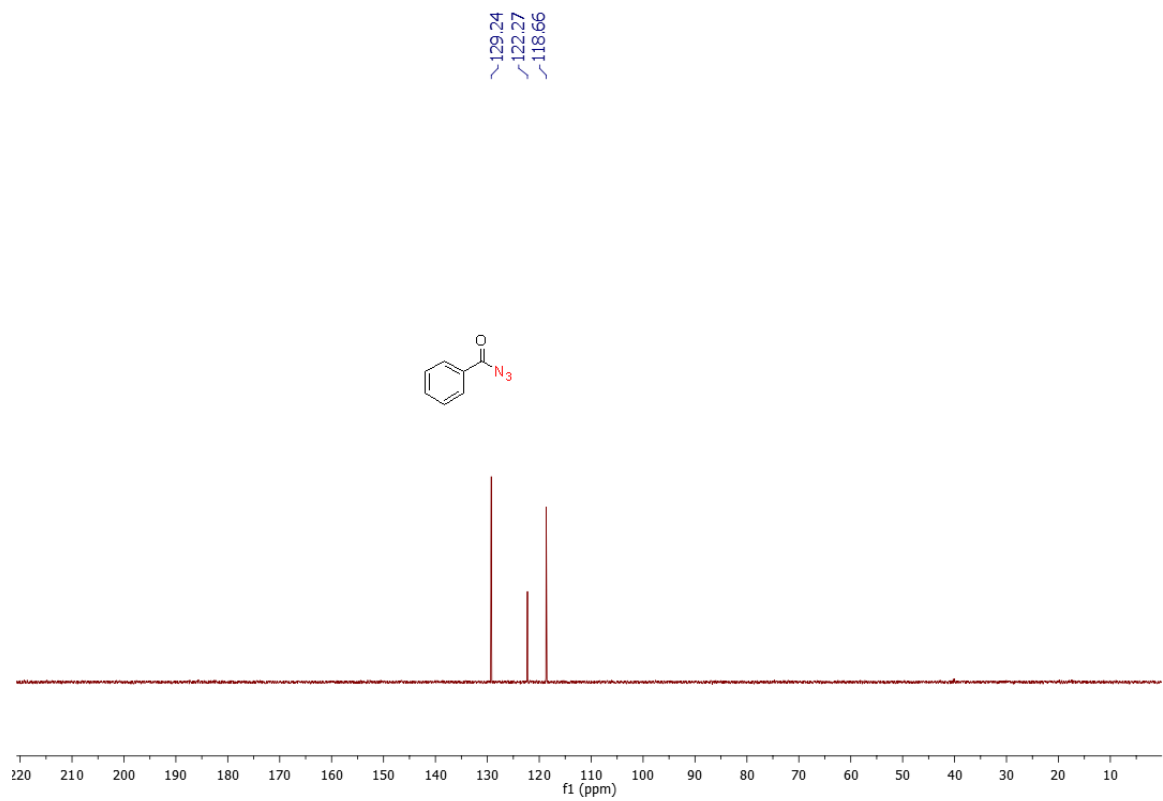

## References:

1. Bao, J.; Kuik, D.; Tranmer, G. K., An efficient one-pot synthesis of N,N'-disubstituted phenylureas and N-aryl carbamates using hydroxylamine-O-sulfonic acid. *Tetrahedron* **2018**, *74*, 5546-5553.
2. Kumar, A.; Kumar, N.; Sharma, R.; Bhargava, G.; Mahajan, D., Direct Conversion of Carboxylic Acids to Various Nitrogen-Containing Compounds in the One-Pot Exploiting Curtius Rearrangement. *The Journal of Organic Chemistry* **2019**, *84*, 11323-11334.
3. Kotecki, B. J.; Fernando, D. P.; Haight, A. R.; Lukin, K. A., A General Method for the Synthesis of Unsymmetrically Substituted Ureas via Palladium-Catalyzed Amidation. *Organic Letters* **2009**, *11*, 947-950.
4. Kulkarni, A. R.; Garai, S.; Thakur, G. A., Scalable, One-Pot, Microwave-Accelerated Tandem Synthesis of Unsymmetrical Urea Derivatives. *The Journal of Organic Chemistry* **2017**, *82*, 992-999.
5. Linclau, B.; Sing, A. K.; Curran, D. P., Organic-Fluorous Phase Switches: A Fluorous Amine Scavenger for Purification in Solution Phase Parallel Synthesis. *The Journal of Organic Chemistry* **1999**, *64*, 2835-2842.
6. Zhang, W.; Lu, Y., 96-Well Plate-to-Plate Gravity Fluorous Solid-Phase Extraction (F-SPE) for Solution-Phase Library Purification. *Journal of Combinatorial Chemistry* **2007**, *9*, 836-843.
7. Qin, C.; Su, Y.; Shen, T.; Shi, X.; Jiao, N., Splitting a Substrate into Three Parts: Gold-Catalyzed Nitrogenation of Alkynes by C≡C and C=C Bond Cleavage. *Angewandte Chemie International Edition* **2016**, *55*, 350-354.
8. Groszek, G., A Convenient Method of Synthesis of Unsymmetrical Urea Derivatives. *Organic Process Research & Development* **2002**, *6*, 759-761.
9. McCreanor, N. G.; Stanton, S.; Bower, J. F., Capture–Collapse Heterocyclization: 1,3-Diazepanes by C–N Reductive Elimination from Rhodacyclopentanones. *Journal of the American Chemical Society* **2016**, *138*, 11465-11468.
10. Zhang, Y.; Xie, C.; Liu, Y.; Shang, F.; Shao, R.; Yu, J.; Wu, C.; Yao, X.; Liu, D.; Wang, Z., Synthesis, biological activities and docking studies of pleuromutilin derivatives with piperazinyl urea linkage. *Journal of Enzyme Inhibition and Medicinal Chemistry* **2021**, *36*, 764-775.
11. Dong, X.-W.; Zhang, J.-K.; Xu, L.; Che, J.-X.; Cheng, G.; Hu, X.-B.; Sheng, L.; Gao, A.-H.; Li, J.; Liu, T.; Hu, Y.-Z.; Zhou, Y.-B., Covalent docking modelling-based discovery of tripeptidyl epoxyketone proteasome inhibitors composed of aliphatic-heterocycles. *European Journal of Medicinal Chemistry* **2019**, *164*, 602-614.
12. Piana, F.; Case, D. H.; Ramalheite, S. M.; Pileio, G.; Facciotti, M.; Day, G. M.; Khimyak, Y. Z.; Angulo, J.; Brown, R. C. D.; Gale, P. A., Substituent interference on supramolecular assembly in urea gelators: synthesis, structure prediction and NMR. *Soft Matter* **2016**, *12*, 4034-4043.
13. Chamni, S.; Zhang, J.; Zou, H., Benign synthesis of unsymmetrical arylurea derivatives using 3-substituted dioxazolones as isocyanate surrogates. *Green Chemistry Letters and Reviews* **2020**, *13*, 246-257.
14. Reuther, J. F.; Novak, B. M., Evidence of Entropy-Driven Bistability through 15N NMR Analysis of a Temperature- and Solvent-Induced, Chiroptical Switching Polycarbodiimide. *Journal of the American Chemical Society* **2013**, *135*, 19292-19303.
15. Okazaki, S.; Noguchi-Yachide, T.; Sakai, T.; Ishikawa, M.; Makishima, M.; Hashimoto, Y.; Yamaguchi, T., Discovery of N-(1-(3-(4-phenoxyphenyl)-1,2,4-oxadiazol-5-yl)ethyl)acetamides as novel acetyl-CoA carboxylase 2 (ACC2) inhibitors with peroxisome proliferator-activated receptor  $\alpha/\delta$  (PPAR $\alpha/\delta$ ) dual agonistic activity. *Bioorganic & Medicinal Chemistry* **2016**, *24*, 5258-5269.

16. Biswas, I. H.; Biswas, S.; Islam, M. S.; Riyajuddin, S.; Sarkar, P.; Ghosh, K.; Islam, S. M., Catalytic synthesis of benzimidazoles and organic carbamates using a polymer supported zinc catalyst through CO<sub>2</sub> fixation. *New Journal of Chemistry* **2019**, *43*, 14643-14652.
17. Kumar, S. V.; Ma, D., Synthesis of N-(Hetero)aryl Carbamates via CuI/MNAO Catalyzed Cross-Coupling of (Hetero)aryl Halides with Potassium Cyanate in Alcohols. *The Journal of Organic Chemistry* **2018**, *83*, 2706-2713.
18. Hou, F.; Du, X.-P.; Alduma, A. I.; Li, Z.-F.; Huo, C.-D.; Wang, X.-C.; Wu, X.-F.; Quan, Z.-J., Disulfide Promoted C–P Bond Cleavage of Phosphoramidate: “P” Surrogates to Synthesize Phosphonates and Phosphinates. *Advanced Synthesis & Catalysis* **2020**, *362*, 4755-4760.
19. Yan, Z.; Tian, W.; Zeng, F.; Dai, Y., 5H-3-oxa-Octafluoropentanesulfonyl fluoride: a novel and efficient condensing agent for esterification, amidation and anhydridization. *Tetrahedron Letters* **2009**, *50*, 2727-2729.
20. Boiocchi, M.; Fabbrizzi, L.; Garolfi, M.; Licchelli, M.; Mosca, L.; Zanini, C., Templated Synthesis of Copper(II) Azacyclam Complexes Using Urea as a Locking Fragment and Their Metal-Enhanced Binding Tendencies towards Anions. *Chemistry – A European Journal* **2009**, *15*, 11288-11297.
21. Krishnan, S.; Patel, P. N.; Balasubramanian, K. K.; Chadha, A., Yeast supported gold nanoparticles: an efficient catalyst for the synthesis of commercially important aryl amines. *New Journal of Chemistry* **2021**, *45*, 1915-1923.
22. Abdullah, F. O.; Behrouzi, L.; Kaboudin, B., A novel synthesis of highly stable palladium nanoparticles and their application in the reduction of nitroaromatic compounds. *Materials Research Express* **2021**, *8*, 095002.
23. Gaikwad, N. B.; Bansod, S.; Mara, A.; Garise, R.; Srinivas, N.; Godugu, C.; Yaddanapudi, V. M., Design, synthesis, and biological evaluation of N-(4-substituted)-3-phenylisoxazolo[5,4-d]pyrimidin-4-amine derivatives as apoptosis-inducing cytotoxic agents. *Bioorganic & Medicinal Chemistry Letters* **2021**, *49*, 128294.
24. Haddenham, D.; Pasumansky, L.; DeSoto, J.; Eagon, S.; Singaram, B., Reductions of Aliphatic and Aromatic Nitriles to Primary Amines with Diisopropylaminoborane. *The Journal of Organic Chemistry* **2009**, *74*, 1964-1970.
25. Stock, C.; Brückner, R., Mild and High-Yielding Molybdenum(VI) Dichloride Dioxide-Catalyzed Formation of Mono-, Di-, Tri-, and Tetracarbamates from Alcohols and Aromatic or Aliphatic Isocyanates. *Advanced Synthesis & Catalysis* **2012**, *354*, 2309-2330.
26. Deng, X.-Z.; Chen, Z.-Y.; Song, Y.; Xue, F.; Yamane, M.; Yue, Y.-N., Direct Access to  $\alpha,\beta$ -Unsaturated Ketones via Rh/MgCl<sub>2</sub>-Mediated Acylation of Vinylsilanes. *The Journal of Organic Chemistry* **2021**, *86*, 12693-12704.
27. Basavaprabhu; Narendra, N.; Lamani, R. S.; Sureshbabu, V. V., T3P® (propylphosphonic anhydride) mediated conversion of carboxylic acids into acid azides and one-pot synthesis of ureidopeptides. *Tetrahedron Letters* **2010**, *51*, 3002-3005.
